# Supplementary material
Source: publisher figshare collection journal article supplement (https://acs.figshare.com/ndownloader/files/3746047)
Supplement: Supplementary file 1 [file 3746047]

## Sheet: summary
Table S1. List of N-terminal peptides identified by ChaFRADIC of wild-type (L, light) and mas1 (H, heavy) mitochondria isolated after growth at non-permissive temperature.
Dataset	Confidence	Annotated Sequence	start	end	Modifications	# Protein Groups	# Proteins	ORF	Gene	# Missed Cleavages	Charge	Search Engine Rank	m/z [Da]	MH+ [Da]	DeltaM [ppm]	Activation Type	Isolation Interference [%]	Ion Inject Time [ms]	RT [min]	First Scan	Spectrum File	Ions Score	Identity Strict	Identity Relaxed	Area	Percolator q-Value	Percolator PEP	Area Light	Area Heavy	H	L	Area H / summed	Area L / summed	Final H /L ratios
qe_Acetyl	High	sHTETQTQQSHFGVDFLMGGVSAAIAkTGAAPIER	2	36	N-Term(Acetyl); K27(Dimethyl)	1	1	YMR056C	AAC1	1	4	1	928.962	3712.83	-3.55543	HCD	2.20858	250	66.0401	16480	qExPlus02_00984.raw	47.3	35	28	3.04464e+06	0	3.563e-05	3.04464e+06	5.50429e+06	3.04464e+06	5.50429e+06	3.04464e+06	5.50429e+06	1.80786
qe	High	yYTSSLSR	15	22	N-Term(Dimethyl:2H(6))	1	1	YKL106W	AAT1	0	1	1	1010.54	1010.54	-3.72308	HCD	0	250	18.5272	4554	qExPlus02_00983.raw	42.23	32	25	1251178	0	0.002458	921916		921916	0	921916	0
qe	High	yYTSSLSR	15	22	N-Term(Dimethyl:2H(6))	1	1	YKL106W	AAT1	0	2	1	505.775	1010.54	0.491507	HCD	6.85331	250	18.3954	4522	qExPlus02_00983.raw	10.55	33	26	4.8007e+07	0.009045	0.2142	6.17373e+07	4.8007e+07	6.17373e+07	4.8007e+07
qe	Medium	yYTSSLSR	15	22	N-Term(Dimethyl)	1	1	YKL106W	AAT1	0	2	1	502.755	1004.5	-1.1438	HCD	13.2695	172.411	18.5073	4549	qExPlus02_00983.raw	7.77	34	27	9.54646e+06	0.02958	0.3145	8307058	2.44509e+06	7.00444e+07	5.04521e+07	7.00444e+07	5.04521e+07	0.720287
qe_Acetyl	High	mNSYSLLTR	1	9	N-Term(Acetyl); M1(Oxidation)	1	1	YMR072W	ABF2	0	1	1	1142.55	1142.55	-2.25261	HCD	0	250	49.5846	12935	qExPlus02_00982.raw	38.88	34	27	1.09563e+07	0	0.05171			0	0
qe_Acetyl	High	mNSYSLLTR	1	9	N-Term(Acetyl)	1	1	YMR072W	ABF2	0	1	1	1126.55	1126.55	-2.46407	HCD	0	250	60.7219	15779	qExPlus02_00982.raw	52.57	33	26	8.87959e+06	0	0.001849			0	0
qe_Acetyl	Medium	mNSYSLLTR	1	9	N-Term(Acetyl); M1(Oxidation)	1	1	YMR072W	ABF2	0	1	1	1142.55	1142.55	-3.42786	HCD	0	250	60.7707	15791	qExPlus02_00982.raw	34.87	33	26	1.13052e+06	0.03468	0.2302			0	0	0	0
qe_Acetyl	High	mNSYSLLTR	1	9	N-Term(Acetyl); M1(Oxidation)	1	1	YMR072W	ABF2	0	2	1	571.777	1142.55	-3.06568	HCD	13.6603	106.95	49.5392	12924	qExPlus02_00982.raw	61.95	34	27	3.86438e+07	0	0.04226			0	0
qe_Acetyl	High	mNSYSLLTR	1	9	N-Term(Acetyl)	1	1	YMR072W	ABF2	0	2	1	563.781	1126.55	-1.77169	HCD	0	142.82	60.9299	15830	qExPlus02_00982.raw	62.8	33	26	4.944e+07	0	0.008035			0	0
qe_Acetyl	Medium	mNSYSLLTR	1	9	N-Term(Acetyl)	1	1	YMR072W	ABF2	0	2	1	563.787	1126.57	9.06402	HCD	0	250	61.2355	15902	qExPlus02_00982.raw	12.71	34	27	3.24946e+06	0.01654	0.187			0	0	0	0
qe_Acetyl	Medium	sTLLkASk	23	30	N-Term(Acetyl); K5(Dimethyl:2H(6)); K8(Dimethyl:2H(6))	1	1	YMR072W	ABF2	1	2	2	479.34	957.672	-1.49363	HCD	21.3634	18.6573	26.8744	6981	qExPlus02_00983.raw	41.9	26	19	1009509727	0.02012	0.1486	1055436864	1009509727	1055436864	1009509727	1055436864	1009509727	0.956485
qe	High	dkLEESPLR	39	47	N-Term(Dimethyl); K2(Dimethyl)	1	1	YNR016C	ACC1	1	2	1	571.823	1142.64	-1.74179	HCD	28.6818	250	22.4644	5499	qExPlus02_00984.raw	37.84	35	28	1.07489e+06	0.005141	0.04756	1.07489e+06	672697	1.07489e+06	672697	1.07489e+06	672697	0.62583
qe	High	tISNLLkQR	2	10	N-Term(Dimethyl:2H(6)); K7(Dimethyl:2H(6))	1	1	YBL015W	ACH1	1	1	1	1140.78	1140.78	-0.929967	HCD	0	195.489	23.2768	5698	qExPlus02_00984.raw	22.93	32	25	2918735	0	0.00261			0	0
qe	High	tISNLLkQR	2	10	N-Term(Dimethyl); K7(Dimethyl)	1	1	YBL015W	ACH1	1	1	1	1128.7	1128.7	-6.34334	HCD		156.97	23.3912	5735	qExPlus02_00984.raw	31.3	34	27	6.82976e+07	0.0008655	0.02676	41761732		41761732	0	41761732	0
qe	High	tISNLLkQR	2	10	N-Term(Dimethyl); K7(Dimethyl)	1	1	YBL015W	ACH1	1	2	1	564.858	1128.71	-1.65072	HCD	11.404	250	56.2672	14146	qExPlus02_00984.raw	19.36	34	27		0.007065	0.09376			0	0
qe	High	tISNLLkQR	2	10	N-Term(Dimethyl:2H(6)); K7(Dimethyl:2H(6))	1	1	YBL015W	ACH1	1	2	1	570.895	1140.78	-1.7443	HCD	13.5184	0.542168	23.3613	5724	qExPlus02_00984.raw	32.43	33	26	8.80109e+08	0	0.002138	1318444984	8.80109e+08	1318444984	8.80109e+08
qe	High	tISNLLkQR	2	10	N-Term(Dimethyl:2H(6)); K7(Dimethyl:2H(6))	1	1	YBL015W	ACH1	1	2	1	570.895	1140.78	-2.17232	HCD	16.9125	4.40931	23.6287	5812	qExPlus02_00984.raw	36.85	33	26	4.34585e+07	0	0.015	1.48384e+08	4.34585e+07	1.46683e+09	9.23568e+08
qe	High	tISNLLkQR	2	10	N-Term(Dimethyl); K7(Dimethyl)	1	1	YBL015W	ACH1	1	2	1	564.857	1128.71	-2.51592	HCD	0	250	24.6455	6061	qExPlus02_00984.raw	33.57	34	27	8.43479e+07	0.0008655	0.01606	83479572	47241953	1.55031e+09	9.7081e+08
qe	High	tISNLLkQR	2	10	N-Term(Dimethyl); K7(Dimethyl)	1	1	YBL015W	ACH1	1	2	1	564.858	1128.71	-1.86702	HCD	10.1681	48.1421	24.9147	6147	qExPlus02_00984.raw	45.89	34	27	6.35082e+06	0.0008655	0.01978	3850610		1.55416e+09	9.7081e+08
qe	High	tISNLLkQR	2	10	N-Term(Dimethyl:2H(6)); K7(Dimethyl:2H(6))	1	1	YBL015W	ACH1	1	2	1	570.895	1140.78	-1.63729	HCD	47.9012	250	25.0473	6184	qExPlus02_00984.raw	29.78	33	26	3.36253e+06	0	0.01011	3.86829e+06	2.72508e+06	1558027218	9.73535e+08
qe	Medium	tISNLLkQR	2	10	N-Term(Dimethyl:2H(6)); K7(Dimethyl:2H(6))	1	1	YBL015W	ACH1	1	2	1	570.897	1140.79	2.1079	HCD	31.4217	250	25.3341	6252	qExPlus02_00984.raw	4.95	31	24	689547	0.03142	0.33	1.26893e+06	689547	1.5593e+09	9.74224e+08
qe	High	tISNLLkQR	2	10	N-Term(Dimethyl); K7(Dimethyl)	1	1	YBL015W	ACH1	1	2	1	564.855	1128.7	-5.54413	HCD	0	17.6422	25.4661	6293	qExPlus02_00984.raw	50.17	34	27	913118	0.004135	0.03851	432334	9102.34	1.55973e+09	9.74233e+08
qe	High	tISNLLkQR	2	10	N-Term(Dimethyl); K7(Dimethyl)	1	1	YBL015W	ACH1	1	2	1	564.858	1128.71	-1.00181	HCD	0	250	26.0378	6441	qExPlus02_00984.raw	46.55	34	27	554094	0	0.006833	554094	729844	1.56028e+09	9.74963e+08
qe	High	tISNLLkQR	2	10	N-Term(Dimethyl); K7(Dimethyl)	1	1	YBL015W	ACH1	1	2	1	564.858	1128.71	-0.569212	HCD	0	250	26.8741	6641	qExPlus02_00984.raw	26.88	34	27	1.40526e+06	0.004844	0.04072	1.40526e+06	845948	1.56169e+09	9.75809e+08
qe	High	tISNLLkQR	2	10	N-Term(Dimethyl:2H(6)); K7(Dimethyl:2H(6))	1	1	YBL015W	ACH1	1	2	1	570.894	1140.78	-3.24237	HCD	22.9739	36.898	27.7029	6860	qExPlus02_00984.raw	18.82	33	26	5.58613e+06	0	0.06557	10559862		1.57225e+09	9.75809e+08
qe	High	tISNLLkQR	2	10	N-Term(Dimethyl:2H(6)); K7(Dimethyl:2H(6))	1	1	YBL015W	ACH1	1	2	1	570.895	1140.78	-2.17232	HCD	18.9428	235.922	28.9274	7173	qExPlus02_00984.raw	24.99	33	26	4184011	0	0.02658		3.11345e+06	1.57225e+09	9.78923e+08
qe	High	tISNLLkQR	2	10	N-Term(Dimethyl); K7(Dimethyl)	1	1	YBL015W	ACH1	1	2	1	564.858	1128.71	-1.71382	HCD		250	29.6079	7356	qExPlus02_00984.raw	43.37	34	27	6.63135e+06	0	0.00134	3534004	9102.34	1.57578e+09	9.78932e+08
qe	High	tISNLLkQR	2	10	N-Term(Dimethyl); K7(Dimethyl)	1	1	YBL015W	ACH1	1	2	1	564.857	1128.71	-2.19147	HCD	40.4366	112.631	29.8744	7426	qExPlus02_00984.raw	35.07	34	27	6645983	0.0008655	0.01992	6645983	3.79299e+06	1.58243e+09	9.82725e+08
qe	High	tISNLLkQR	2	10	N-Term(Dimethyl); K7(Dimethyl)	1	1	YBL015W	ACH1	1	2	1	564.861	1128.71	4.08125	HCD	50.4147	250	30.3413	7544	qExPlus02_00984.raw	33.87	33	26	3.50959e+06	0	0.004085	2.57729e+06	9102.34	1.585e+09	9.82734e+08
qe	High	tISNLLkQR	2	10	N-Term(Dimethyl); K7(Dimethyl)	1	1	YBL015W	ACH1	1	2	1	564.859	1128.71	-0.0284609	HCD		250	31.162	7776	qExPlus02_00984.raw	30.45	34	27	2.09494e+06	0.004135	0.03691	2.09494e+06	2.15301e+06	1.5871e+09	9.84887e+08
qe	High	tISNLLkQR	2	10	N-Term(Dimethyl); K7(Dimethyl)	1	1	YBL015W	ACH1	1	2	1	564.859	1128.71	1.48564	HCD	90.1076	250	31.5617	7890	qExPlus02_00984.raw	19.18	32	25	5.16046e+06	0.004844	0.04022	5.16046e+06	4.38364e+06	1.59226e+09	9.89271e+08
qe	High	tISNLLkQR	2	10	N-Term(Dimethyl); K7(Dimethyl)	1	1	YBL015W	ACH1	1	2	1	564.86	1128.71	2.2427	HCD	0	250	35.8608	9107	qExPlus02_00984.raw	11.37	32	25	1.58255e+06	0.007065	0.117	1.58255e+06	1.11438e+06	1.59384e+09	9.90385e+08
qe	Medium	tISNLLkQR	2	10	N-Term(Dimethyl:2H(6)); K7(Dimethyl:2H(6))	1	1	YBL015W	ACH1	1	2	1	570.895	1140.78	-2.06531	HCD	17.5673	250	37.6332	9572	qExPlus02_00984.raw	10.31	33	26	2.02514e+06	0.01812	0.2572	3.22524e+06	2.02514e+06	1.59707e+09	9.9241e+08
qe	High	tISNLLkQR	2	10	N-Term(Dimethyl); K7(Dimethyl)	1	1	YBL015W	ACH1	1	2	1	564.858	1128.71	-0.569212	HCD	0	250	38.6423	9819	qExPlus02_00984.raw	18.37	34	27	2.41985e+06	0.007065	0.09015	1.66538e+06		1.59873e+09	9.9241e+08
qe	Medium	tISNLLkQR	2	10	N-Term(Dimethyl); K7(Dimethyl)	1	1	YBL015W	ACH1	1	2	1	564.857	1128.71	-1.97517	HCD	10.1413	250	39.5065	10059	qExPlus02_00984.raw	3.52	34	27	2.96368e+06	0.01252	0.1693	2.0991e+06		1.60083e+09	9.9241e+08
qe	High	tISNLLkQR	2	10	N-Term(Dimethyl); K7(Dimethyl)	1	1	YBL015W	ACH1	1	2	1	564.859	1128.71	0.836742	HCD	11.5491	250	42.6849	10855	qExPlus02_00984.raw	20.87	32	25	786509	0.0008655	0.01538	586182		1.60142e+09	9.9241e+08
qe	High	tISNLLkQR	2	10	N-Term(Dimethyl); K7(Dimethyl)	1	1	YBL015W	ACH1	1	2	1	564.858	1128.71	-0.785513	HCD	0	250	43.1172	10955	qExPlus02_00984.raw	17.17	34	27	1.84621e+06	0.007065	0.1163	1.84621e+06	690338	1.60327e+09	9.931e+08
qe	High	tISNLLkQR	2	10	N-Term(Dimethyl); K7(Dimethyl)	1	1	YBL015W	ACH1	1	2	1	564.857	1128.71	-3.48927	HCD	0	250	43.9007	11142	qExPlus02_00984.raw	31.74	34	27	1.33629e+06	0	0.002286	1.33629e+06	788721	1.6046e+09	9.93889e+08
qe	High	tISNLLkQR	2	10	N-Term(Dimethyl:2H(6)); K7(Dimethyl:2H(6))	1	1	YBL015W	ACH1	1	2	1	570.896	1140.78	-0.781246	HCD	11.6964	250	44.3336	11245	qExPlus02_00984.raw	23.27	32	25	618260	0	0.03534	1.80969e+06	618260	1.60641e+09	9.94507e+08
qe	High	tISNLLkQR	2	10	N-Term(Dimethyl:2H(6)); K7(Dimethyl:2H(6))	1	1	YBL015W	ACH1	1	2	1	570.895	1140.78	-1.42328	HCD	9.19517	250	46.2587	11705	qExPlus02_00984.raw	24.82	32	25	695306	0.001946	0.07402	1.00926e+06	695306	1.60742e+09	9.95203e+08
qe	High	tISNLLkQR	2	10	N-Term(Dimethyl); K7(Dimethyl)	1	1	YBL015W	ACH1	1	2	1	564.858	1128.71	-0.569212	HCD	0	250	47.2103	11930	qExPlus02_00984.raw	31.69	34	27	1.46313e+06	0	0.001442	864273		1.60828e+09	9.95203e+08
qe	High	tISNLLkQR	2	10	N-Term(Dimethyl); K7(Dimethyl)	1	1	YBL015W	ACH1	1	2	1	564.858	1128.71	-0.244761	HCD	0	250	50.8524	12816	qExPlus02_00984.raw	35.74	34	27	476551	0.0008655	0.01592	373063		1.60866e+09	9.95203e+08
qe	High	tISNLLkQR	2	10	N-Term(Dimethyl); K7(Dimethyl)	1	1	YBL015W	ACH1	1	2	1	564.858	1128.71	-0.785513	HCD	4.68743	250	51.3935	12973	qExPlus02_00984.raw	12.56	34	27	595670	0.008862	0.1483	595670	436753	1.60925e+09	9.95639e+08
qe	Medium	tISNLLkQR	2	10	N-Term(Dimethyl); K7(Dimethyl)	1	1	YBL015W	ACH1	1	2	1	564.857	1128.71	-1.97517	HCD	23.7064	250	51.883	13098	qExPlus02_00984.raw	8.07	34	27	1.45063e+06	0.0414	0.3816	1.35494e+06	767894	1.61061e+09	9.96407e+08
qe	High	tISNLLkQR	2	10	N-Term(Dimethyl); K7(Dimethyl)	1	1	YBL015W	ACH1	1	2	1	564.858	1128.71	-1.65072	HCD	20.3976	250	52.2482	13186	qExPlus02_00984.raw	33.47	34	27	660995	0.0008655	0.02445			1.61061e+09	9.96407e+08
qe	High	tISNLLkQR	2	10	N-Term(Dimethyl); K7(Dimethyl)	1	1	YBL015W	ACH1	1	2	1	564.857	1128.71	-2.19147	HCD	16.3269	250	52.7291	13302	qExPlus02_00984.raw	24.19	34	27	844512	0	0.004181	551467		1.61116e+09	9.96407e+08
qe	Medium	tISNLLkQR	2	10	N-Term(Dimethyl:2H(6)); K7(Dimethyl:2H(6))	1	1	YBL015W	ACH1	1	2	1	570.895	1140.78	-1.7443	HCD	5.60051	250	53.1458	13405	qExPlus02_00984.raw	3.19	33	26	808051	0.02386	0.2897	1.5331e+06	808051	1612692791	9.97215e+08	1612692791	9.97215e+08	0.618354
qe_Acetyl	High	tISNLLkQR	2	10	N-Term(Acetyl); K7(Dimethyl:2H(6))	1	1	YBL015W	ACH1	1	2	1	574.866	1148.72	-1.79812	HCD	17.0577	250	45.3226	12071	qExPlus02_00983.raw	34.1	33	26	3.01662e+06	0	0.001245	2.76527e+06	2.89217e+06	2.76527e+06	2.89217e+06	2.76527e+06	2.89217e+06	1.04589
qe	High	tISNLLkQR	2	10	N-Term(Dimethyl:2H(6)); K7(Dimethyl:2H(6))	1	1	YBL015W	ACH1	1	3	1	380.932	1140.78	-2.34461	HCD	31.5636	250	23.7279	5838	qExPlus02_00984.raw	21.32	33	26	1.37073e+06	0	0.02392	16569050	1.37073e+06	16569050	1.37073e+06	16569050	1.37073e+06	0.0827282
Fusion	Medium	tISNLLkQR	2	10	N-Term(Dimethyl:2H(6)); K7(Dimethyl:2H(6))	1	1	YBL015W	ACH1	1	3	1	380.933	1140.79	0.384028	ETD	30.019	50	5.57982	3234	Fusion002161.raw	26.21	20	13	2.42744e+06	0.02782	0.3622	3532.53	2.0621e+06	3532.53	2.0621e+06
Fusion	Medium	tISNLLkQR	2	10	N-Term(Dimethyl); K7(Dimethyl)	1	1	YBL015W	ACH1	1	3	1	376.908	1128.71	-0.608163	HCD	2.1789	27.808	72.9404	30657	Fusion002161.raw	15.2	24	17	9.03313e+06	0.02961	0.345	9.03313e+06	5.65459e+06	9.03667e+06	7.71668e+06
Fusion	Medium	tISNLLkQR	2	10	N-Term(Dimethyl:2H(6)); K7(Dimethyl:2H(6))	1	1	YBL015W	ACH1	1	3	1	380.934	1140.79	2.22987	HCD	15.4433	37.7388	13.3534	7671	Fusion002161.raw	16.59	20	13	1.35128e+06	0.04396	0.3613			9.03667e+06	7.71668e+06
Fusion	Medium	tISNLLkQR	2	10	N-Term(Dimethyl:2H(6)); K7(Dimethyl:2H(6))	1	1	YBL015W	ACH1	1	3	1	380.932	1140.78	-3.78919	HCD	61.139	27.988	0.926225	526	Fusion002161.raw	18.86	24	17	3.36974e+06	0.02958	0.2992	3532.53	1.97715e+06	9.0402e+06	9.69383e+06
Fusion	Medium	tISNLLkQR	2	10	N-Term(Dimethyl:2H(6)); K7(Dimethyl:2H(6))	1	1	YBL015W	ACH1	1	3	1	380.934	1140.79	3.11267	HCD	44.9663	62.5613	14.3765	8242	Fusion002161.raw	23.44	20	13	839892	0.02617	0.2297		601780	9.0402e+06	1.02956e+07
Fusion	High	tISNLLkQR	2	10	N-Term(Dimethyl:2H(6)); K7(Dimethyl:2H(6))	1	1	YBL015W	ACH1	1	3	1	380.935	1140.79	4.15597	HCD	21.8089	68.6205	21.939	12415	Fusion002161.raw	28.21	20	13	804107	0	0.05856	814209	715232	9.85441e+06	1.10108e+07
Fusion	High	tISNLLkQR	2	10	N-Term(Dimethyl:2H(6)); K7(Dimethyl:2H(6))	1	1	YBL015W	ACH1	1	3	1	380.933	1140.79	0.464282	ETD	47.0562	50	16.534	9455	Fusion002161.raw	38.09	20	13	1.82849e+06	0	0.1137	3532.53	1.01361e+06	9.85794e+06	1.20245e+07
Fusion	High	tISNLLkQR	2	10	N-Term(Dimethyl:2H(6)); K7(Dimethyl:2H(6))	1	1	YBL015W	ACH1	1	3	1	380.933	1140.78	-0.579022	ETD	50.6586	50	18.9086	10794	Fusion002161.raw	30.27	21	14	1.22476e+06	0	0.06301	2.0181e+06	1.1565e+06	1.1876e+07	1.3181e+07
Fusion	High	tISNLLkQR	2	10	N-Term(Dimethyl:2H(6)); K7(Dimethyl:2H(6))	1	1	YBL015W	ACH1	1	3	1	380.933	1140.78	-0.418513	ETD	68.2125	50	17.9015	10218	Fusion002161.raw	26.05	21	14	1.13262e+06	0	0.06372	2.64249e+06	1.13262e+06	1.45185e+07	1.43136e+07
Fusion	High	tISNLLkQR	2	10	N-Term(Dimethyl); K7(Dimethyl)	1	1	YBL015W	ACH1	1	3	1	376.909	1128.71	2.71746	HCD	1.65873	27.808	58.934	27139	Fusion002161.raw	41.55	23	16	2.6362e+07	0	0.05039	2.62823e+07	1.90166e+07	4.08008e+07	3.33302e+07
Fusion	High	tISNLLkQR	2	10	N-Term(Dimethyl:2H(6)); K7(Dimethyl:2H(6))	1	1	YBL015W	ACH1	1	3	1	380.933	1140.79	0.303774	ETD	48.9556	50	31.7385	8227	Fusion002163.raw	27.35	20	13	61525.9	0	0.2274	1.43323e+06	61525.9	4.2234e+07	3.33917e+07
Fusion	High	tISNLLkQR	2	10	N-Term(Dimethyl:2H(6)); K7(Dimethyl:2H(6))	1	1	YBL015W	ACH1	1	3	1	380.933	1140.78	-0.258005	HCD	13.8015	29.9265	4.33988	2518	Fusion002161.raw	24.09	21	14	3.10486e+06	0	0.1429	3532.53	2.12155e+06	4.22376e+07	3.55133e+07
Fusion	High	tISNLLkQR	2	10	N-Term(Dimethyl); K7(Dimethyl)	1	1	YBL015W	ACH1	1	3	1	376.908	1128.71	0.527415	HCD	11.8943	27.8229	2.89897	1677	Fusion002161.raw	24.48	21	14	7.29851e+06	0	0.1679	4235386	3532.53	4.64729e+07	3.55168e+07
Fusion	High	tISNLLkQR	2	10	N-Term(Dimethyl:2H(6)); K7(Dimethyl:2H(6))	1	1	YBL015W	ACH1	1	3	1	380.932	1140.78	-2.66563	ETD	69.2369	50	4.9509	2871	Fusion002161.raw	28.51	24	17	2.38766e+06	0	0.2646			4.64729e+07	3.55168e+07
Fusion	High	tISNLLkQR	2	10	N-Term(Dimethyl:2H(6)); K7(Dimethyl:2H(6))	1	1	YBL015W	ACH1	1	3	1	380.933	1140.78	-1.62233	HCD	18.6822	34.8665	12.6965	7307	Fusion002161.raw	25.03	24	17	1.92126e+06	0	0.1889			4.64729e+07	3.55168e+07
Fusion	High	tISNLLkQR	2	10	N-Term(Dimethyl:2H(6)); K7(Dimethyl:2H(6))	1	1	YBL015W	ACH1	1	3	1	380.933	1140.78	-1.62233	ETD	32.8561	50	6.59329	3823	Fusion002161.raw	34.16	24	17	2.29083e+06	0	0.1601	3.05773e+06	2.29083e+06	4.95307e+07	3.78076e+07
Fusion	High	tISNLLkQR	2	10	N-Term(Dimethyl:2H(6)); K7(Dimethyl:2H(6))	1	1	YBL015W	ACH1	1	3	1	380.934	1140.79	0.865553	HCD	6.2723	29.9302	7.19685	4170	Fusion002161.raw	20.52	20	13	1.71545e+06	0	0.1378			4.95307e+07	3.78076e+07	4.95307e+07	3.78076e+07	0.763318
qe	High	mNNkLIYR	1	8	N-Term(Dimethyl:2H(6)); K4(Dimethyl:2H(6))	1	1	YDR511W	ACN9	1	2	1	560.358	1119.71	-1.40882	HCD	8.93437	250	18.1515	4426	qExPlus02_00984.raw	24.46	34	27	3.22341e+06	0	0.01369	9102.34	2.02171e+06	9102.34	2.02171e+06
qe	High	mNNkLIYR	1	8	N-Term(Dimethyl:2H(6)); M1(Oxidation); K4(Dimethyl:2H(6))	1	1	YDR511W	ACN9	1	2	1	568.356	1135.7	-0.673529	HCD	0	250	18.1656	4429	qExPlus02_00984.raw	29.16	34	27	2.49541e+06	0	0.02484	9102.34	1320132	18204.7	3.34185e+06	18204.7	3.34185e+06	183.571
qe_Acetyl	High	mNNkLIYR	1	8	N-Term(Acetyl); M1(Oxidation); K4(Dimethyl:2H(6))	1	1	YDR511W	ACN9	1	2	1	572.325	1143.64	-3.08326	HCD	7.71655	134.459	34.0308	9318	qExPlus02_00983.raw	22.09	34	27	2.24525e+07	0.001447	0.03007	19568.4	12140544	19568.4	12140544
qe_Acetyl	Medium	mNNkLIYR	1	8	N-Term(Acetyl); M1(Oxidation); K4(Dimethyl:2H(6))	1	1	YDR511W	ACN9	1	2	1	572.328	1143.65	1.71994	HCD	39.8146	120.806	24.1073	6035	qExPlus02_00983.raw	15.33	33	26	2.46504e+08	0.01213	0.1124	3.89147e+06	209653296	3.91103e+06	221793840	3.91103e+06	221793840	56.7098
qe	High	aTHNSQLLLPPLVLYR	13	28	N-Term(Dimethyl:2H(6))	1	1	YDR511W	ACN9	0	2	1	935.065	1869.12	0.124333	HCD	0	250	58.8884	14779	qExPlus02_00984.raw	70.32	34	27	1.58641e+06	0	6.035e-07	1.93519e+07	1.58641e+06	1.93519e+07	1.58641e+06	1.93519e+07	1.58641e+06	0.0819766
qe	High	aTHNSQLLLPPLVLYR	13	28	N-Term(Dimethyl)	1	1	YDR511W	ACN9	0	3	1	621.7	1863.09	0.217038	HCD	0	250	58.8104	14761	qExPlus02_00984.raw	51.81	32	25	2.5706e+07	0	2.549e-05	2.56039e+07	3.22297e+06	2.56039e+07	3.22297e+06
qe	High	aTHNSQLLLPPLVLYR	13	28	N-Term(Dimethyl)	1	1	YDR511W	ACN9	0	3	1	621.699	1863.08	-1.74858	HCD	0	250	59.3273	14886	qExPlus02_00984.raw	44.37	33	26	71315.6	0	0.0002572			2.56039e+07	3.22297e+06	2.56039e+07	3.22297e+06	0.125878
qe	High	gLATVSNLTR	15	24	N-Term(Dimethyl:2H(6))	1	1	YLR304C	ACO1	0	2	1	533.329	1065.65	-2.15493	HCD	0	73.3544	26.1015	6705	qExPlus02_00983.raw	32.41	33	26	2.68216e+07	0	0.007548	15288853	24947104	15288853	24947104	15288853	24947104	1.63172
qe	High	lATVSNLTR	16	24	N-Term(Dimethyl:2H(6))	1	1	YLR304C	ACO1	0	1	1	1008.63	1008.63	-2.40495	HCD	5.9318	89.6426	26.3954	6803	qExPlus02_00983.raw	56.08	34	27	386487856	0	0.011	723270522	386487856	723270522	386487856	723270522	386487856	0.534361
qe_Acetyl	Medium	lATVSNLTR	16	24	N-Term(Acetyl)	1	1	YLR304C	ACO1	0	1	1	1016.58	1016.58	1.68215	HCD	12.4121	102.429	26.7301	6934	qExPlus02_00983.raw	6.39	33	26	13951392	0.04774	0.2909			0	0	0	0
qe	High	lATVSNLTR	16	24	N-Term(Dimethyl:2H(6))	1	1	YLR304C	ACO1	0	2	1	504.818	1008.63	-2.53931	HCD	5.21521	0.355827	26.61	6891	qExPlus02_00983.raw	26.18	34	27	5201463808	0.004334	0.1441	10863688809	5201463808	10863688809	5201463808
qe	High	lATVSNLTR	16	24	N-Term(Dimethyl:2H(6))	1	1	YLR304C	ACO1	0	2	1	504.819	1008.63	-1.57111	HCD	8.50152	27.307	26.8685	6979	qExPlus02_00983.raw	40.78	34	27	1.20721e+08	0	0.01307	4.05004e+08	1.20721e+08	1.12687e+10	5.32218e+09
qe	High	lATVSNLTR	16	24	N-Term(Dimethyl:2H(6))	1	1	YLR304C	ACO1	0	2	1	504.819	1008.63	-1.75264	HCD	8.90425	34.5771	27.1288	7071	qExPlus02_00983.raw	24.41	34	27	3.94313e+07	0	0.04983	108897115	3.94313e+07	1.13776e+10	5361615904
qe	High	lATVSNLTR	16	24	N-Term(Dimethyl)	1	1	YLR304C	ACO1	0	2	1	501.8	1002.59	-0.543352	HCD	4.50265	56.0473	27.2874	7129	qExPlus02_00983.raw	13.75	35	28	88893005	0.008407	0.1297	88893005	3.11931e+07	1.14665e+10	5.39281e+09
qe	Medium	lATVSNLTR	16	24	N-Term(Dimethyl)	1	1	YLR304C	ACO1	0	2	1	501.8	1002.59	-1.7609	HCD	10.7618	250	28.6239	7635	qExPlus02_00983.raw	5.79	36	29	2.83196e+06	0.04741	0.4325	2.83196e+06	1.46751e+06	11469314924	5.39428e+09
qe	High	lATVSNLTR	16	24	N-Term(Dimethyl)	1	1	YLR304C	ACO1	0	2	1	501.8	1002.59	-1.57826	HCD	0	63.9538	29.2072	7811	qExPlus02_00983.raw	19.26	36	29	1.50927e+07	0.0008655	0.02245	1.50927e+07	1.10321e+07	1.14844e+10	5.40531e+09	1.14844e+10	5.40531e+09	0.470665
qe_Acetyl	High	lATVSNLTR	16	24	N-Term(Acetyl)	1	1	YLR304C	ACO1	0	2	1	508.79	1016.57	-1.33308	HCD	13.605	20.4169	26.4744	6835	qExPlus02_00983.raw	50.74	34	27	28621710	0.001447	0.03121			0	0
qe_Acetyl	Medium	lATVSNLTR	16	24	N-Term(Acetyl)	1	1	YLR304C	ACO1	0	2	1	508.79	1016.57	-0.0121961	HCD	45.8178	4.65158	26.739	6937	qExPlus02_00983.raw	38.66	34	27	217865752	0.04505	0.2766			0	0	0	0
qe	High	aTVSNLTR	17	24	N-Term(Dimethyl:2H(6))	1	1	YLR304C	ACO1	0	1	1	895.544	895.544	-3.91473	HCD	0	250	53.2212	13895	qExPlus02_00982.raw	45.92	34	27	1.96415e+06	0.004334	0.1482	9102.34	1.43506e+06	9102.34	1.43506e+06
qe	High	aTVSNLTR	17	24	N-Term(Dimethyl)	1	1	YLR304C	ACO1	0	1	1	889.508	889.508	-2.77222	HCD	17.4145	250	15.7069	3830	qExPlus02_00983.raw	42.92	37	30	6.31425e+08	0.004844	0.04196	6.31425e+08	6.41567e+08	6.31434e+08	6.43002e+08
qe	Medium	aTVSNLTR	17	24	N-Term(Dimethyl)	1	1	YLR304C	ACO1	0	1	1	889.51	889.51	0.38414	HCD	0	250	16.2289	3985	qExPlus02_00983.raw	36.42	36	29	25364.3	0.04605	0.4229		9102.34	6.31434e+08	6.43011e+08	6.31434e+08	6.43011e+08	1.01833
qe	Medium	aTVSNLTR	17	24	N-Term(Dimethyl)	1	1	YLR304C	ACO1	0	2	1	445.258	889.509	-1.62086	HCD	62.5436	180.657	14.652	3548	qExPlus02_00983.raw	15.75	37	30	1.47997e+07	0.02986	0.3268	1.47997e+07	1.73623e+07	1.47997e+07	1.73623e+07
qe	High	aTVSNLTR	17	24	N-Term(Dimethyl:2H(6))	1	1	YLR304C	ACO1	0	2	1	448.277	895.547	-1.40805	HCD	4.67879	10.8155	15.6678	3816	qExPlus02_00983.raw	51.22	34	27	3.33558e+09	0	0.01371	3386430854	3328504788	3.40123e+09	3.34587e+09	3.40123e+09	3.34587e+09	0.983723
qe_Acetyl	High	aTVSNLTR	17	24	N-Term(Acetyl)	1	1	YLR304C	ACO1	0	2	1	452.248	903.489	-0.330999	HCD	38.9889	170.617	16.0891	3952	qExPlus02_00983.raw	4.47	34	27	131183472	0.001447	0.05772			0	0	0	0
qe	High	sFINYkQNVETLDIVR	37	52	N-Term(Dimethyl); K6(Dimethyl)	1	1	YLR304C	ACO1	1	3	1	665.7	1995.09	-2.37394	HCD	0	250	48.4694	12243	qExPlus02_00984.raw	12.73	36	29	209966	0.004844	0.04426	142306	9102.34	142306	9102.34	142306	9102.34	0.0639631
qe_Acetyl	Medium	mLSSANR	1	7	N-Term(Acetyl)	1	1	YJL200C	ACO2	0	1	1	820.398	820.398	-0.410083	HCD	0	250	31.655	7967	qExPlus02_00982.raw	23.62	33	26	6.51569e+06	0.01408	0.1292			0	0	0	0
qe_Acetyl	High	mLSSANR	1	7	N-Term(Acetyl)	1	1	YJL200C	ACO2	0	2	1	410.702	820.396	-2.80718	HCD	0	107.067	31.8585	8029	qExPlus02_00982.raw	40.55	32	25	8.1637e+07	0.003945	0.08364			0	0
qe_Acetyl	Medium	mLSSANR	1	7	N-Term(Acetyl); M1(Oxidation)	1	1	YJL200C	ACO2	0	2	1	418.699	836.391	-2.58473	HCD	20.8552	58.5424	31.7036	7983	qExPlus02_00982.raw	40.76	31	24	3.55049e+07	0.02204	0.1596			0	0	0	0
qe	High	sANLSkDQVSQR	37	48	N-Term(Dimethyl:2H(6)); K6(Dimethyl:2H(6))	1	1	YKL192C	ACP1	1	2	1	700.912	1400.82	-5.33602	HCD	0	250	11.5895	2794	qExPlus02_00984.raw	51.04	35	28	5.47156e+06	0	3.952e-05	1.36514e+07	5.47156e+06	1.36514e+07	5.47156e+06
qe	High	sANLSkDQVSQR	37	48	N-Term(Dimethyl); K6(Dimethyl)	1	1	YKL192C	ACP1	1	2	1	694.875	1388.74	-4.0606	HCD	0	250	11.9113	2871	qExPlus02_00984.raw	37.04	36	29	236470	0	0.008947		9102.34	1.36514e+07	5.48066e+06	1.36514e+07	5.48066e+06	0.401473
qe	High	lDGLQDYQR	70	78	N-Term(Dimethyl:2H(6))	1	1	YAL054C	ACS1	0	2	1	571.31	1141.61	0.311976	HCD	79.5291	250	31.0383	8421	qExPlus02_00983.raw	7.2	33	26	6.24408e+06	0.001946	0.08726	7.95425e+06	6.24408e+06	7.95425e+06	6.24408e+06	7.95425e+06	6.24408e+06	0.784998
qe	Medium	gLQDYQR	72	78	N-Term(Dimethyl:2H(6))	1	1	YAL054C	ACS1	0	2	1	457.258	913.508	8.32322	HCD	48.8223	250	16.1145	3958	qExPlus02_00983.raw	6.03	34	27	2.20774e+06	0.01602	0.2429	9102.34	1.4333e+06	9102.34	1.4333e+06	9102.34	1.4333e+06	157.465
qe	High	rTSTLFTR	3	10	N-Term(Dimethyl:2H(6))	1	1	YMR083W	ADH3	1	2	1	508.311	1015.61	-2.16534	HCD	32.6958	250	15.6394	3800	qExPlus02_00984.raw	12.7	34	27	4.323e+06	0.005861	0.1772	9102.34	2799828	9102.34	2799828	9102.34	2799828	307.594
qe	High	tSTLFTR	4	10	N-Term(Dimethyl:2H(6))	1	1	YMR083W	ADH3	0	1	1	859.513	859.513	-2.35818	HCD	0	101.437	24.8075	6251	qExPlus02_00983.raw	27.35	33	26	5.36873e+07	0	0.03406	9102.34	35742432	9102.34	35742432	9102.34	35742432	3926.73
qe_Acetyl	Medium	tSTLFTR	4	10	N-Term(Acetyl)	1	1	YMR083W	ADH3	0	1	1	867.454	867.454	-3.61998	HCD	0	250	48.4945	12651	qExPlus02_00982.raw	30.31	33	26	9.19702e+06	0.03309	0.2201			0	0	0	0
qe	High	tSTLFTR	4	10	N-Term(Dimethyl:2H(6))	1	1	YMR083W	ADH3	0	2	1	430.261	859.514	-1.59271	HCD	41.1528	32.3246	24.7976	6247	qExPlus02_00983.raw	20.23	33	26	148567109	0.005861	0.1844	9102.34	100194736	9102.34	100194736
qe	Medium	tSTLFTR	4	10	N-Term(Dimethyl:2H(6))	1	1	YMR083W	ADH3	0	2	1	430.261	859.514	-1.73473	HCD	38.809	250	25.1569	6393	qExPlus02_00983.raw	4.68	33	26	5.8242e+06	0.02733	0.3007	9102.34	5467314	18204.7	105662050	18204.7	105662050	5804.11
qe_Acetyl	High	tSTLFTR	4	10	N-Term(Acetyl)	1	1	YMR083W	ADH3	0	2	1	434.232	867.456	-1.52465	HCD	0	250	48.5552	12667	qExPlus02_00982.raw	34.31	33	26	1.85565e+06	0.002723	0.07677			0	0	0	0
qe	High	tGGDNNEYIYIGR	47	59	N-Term(Dimethyl:2H(6))	1	1	YCR010C	ADY2	0	2	1	753.377	1505.75	-2.74878	HCD	3.88319	250	37.6066	10230	qExPlus02_00983.raw	76.6	32	25	2.37045e+07	0	0.0002242	3.73115e+07	2.37045e+07	3.73115e+07	2.37045e+07	3.73115e+07	2.37045e+07	0.635314
qe_Acetyl	High	mEQINSNSR	1	9	N-Term(Acetyl)	1	1	YPR021C	AGC1	0	1	1	1120.5	1120.5	-1.97944	HCD	0	250	31.5717	7946	qExPlus02_00982.raw	43.43	32	25	2.13022e+06	0.001447	0.03994			0	0	0	0
qe_Acetyl	High	mEQINSNSR	1	9	N-Term(Acetyl)	1	1	YPR021C	AGC1	0	2	1	560.755	1120.5	-2.48168	HCD	4.33714	144.201	31.4741	7919	qExPlus02_00982.raw	42.33	33	26	9.7139e+07	0	0.02615			0	0
qe_Acetyl	High	mEQINSNSR	1	9	N-Term(Acetyl); M1(Oxidation)	1	1	YPR021C	AGC1	0	2	1	568.752	1136.5	-2.26885	HCD	0	250	17.8797	4355	qExPlus02_00982.raw	57.26	31	24	3.67523e+06	0	0.01421			0	0	0	0
qe	Medium	mkLPQTMLR	1	9	N-Term(Dimethyl:2H(6)); K2(Dimethyl:2H(6))	1	1	YAL046C	AIM1	1	2	1	593.382	1185.76	-2.79524	HCD	54.7614	250	31.6583	7917	qExPlus02_00984.raw	24.92	34	27	3.48983e+06	0.02674	0.2983	9102.34	1.9849e+06	9102.34	1.9849e+06	9102.34	1.9849e+06	218.065
qe_Acetyl	High	tYTSAATAAAANR	22	34	N-Term(Acetyl)	1	1	YHL021C	AIM17	0	2	1	655.819	1310.63	-2.45879	HCD	0	250	34.822	8832	qExPlus02_00982.raw	81.32	34	27	9.04853e+06	0	0.0001907			0	0	0	0
qe	High	yTSAATAAAANR	23	34	N-Term(Dimethyl:2H(6))	1	1	YHL021C	AIM17	0	2	1	601.326	1201.64	0.487839	HCD	63.3889	250	13.6915	3314	qExPlus02_00983.raw	56.92	33	26	5.71847e+06	0	0.003152	1.72179e+07	5.71847e+06	1.72179e+07	5.71847e+06	1.72179e+07	5.71847e+06	0.332123
qe	High	fNNVFLR	64	70	N-Term(Dimethyl)	1	1	YHL021C	AIM17	0	2	1	469.265	937.523	-2.31631	HCD	5.57139	250	39.9427	10786	qExPlus02_00983.raw	30.96	34	27	3.44552e+06	0.006573	0.08367	3.44552e+06	3.82634e+06	3.44552e+06	3.82634e+06	3.44552e+06	3.82634e+06	1.11053
qe_Acetyl	High	sAkPATDDAkDELLSPFR	2	19	N-Term(Acetyl); K3(Dimethyl); K10(Dimethyl)	1	1	YIL087C	AIM19	1	2	1	1030.04	2059.07	-2.13739	HCD	0	250	47.1412	12510	qExPlus02_00983.raw	81.44	36	29	14339643	0	0.002317	14339643	25054267	14339643	25054267	14339643	25054267	1.7472
qe_Acetyl	High	sAkPATDDAkDELLSPFR	2	19	N-Term(Acetyl); K3(Dimethyl); K10(Dimethyl)	1	1	YIL087C	AIM19	1	3	1	687.027	2059.07	-1.78822	HCD	0	104.896	47.3264	12556	qExPlus02_00983.raw	49.18	36	29	91848790	0	0.0001824	91848790	1.66548e+08	91848790	1.66548e+08	91848790	1.66548e+08	1.81329
qe_Acetyl	High	sAkPATDDAkDELLSPFRR	2	20	N-Term(Acetyl); K3(Dimethyl); K10(Dimethyl)	1	1	YIL087C	AIM19	2	3	1	739.062	2215.17	0.222384	HCD	0	250	40.2062	10231	qExPlus02_00984.raw	25.69	36	29	4.30905e+07	0	0.0003192	4.29153e+07	2.91028e+07	4.29153e+07	2.91028e+07
qe_Acetyl	High	sAkPATDDAkDELLSPFRR	2	20	N-Term(Acetyl); K3(Dimethyl); K10(Dimethyl)	1	1	YIL087C	AIM19	2	3	1	739.062	2215.17	0.305043	HCD	2.10857	250	39.952	10170	qExPlus02_00984.raw	18.89	36	29	3.32217e+07	0	0.001164	3.32217e+07	9.37891e+07	7.6137e+07	1.22892e+08
qe_Acetyl	Medium	sAkPATDDAkDELLSPFRR	2	20	N-Term(Acetyl); K3(Dimethyl:2H(6)); K10(Dimethyl:2H(6))	1	1	YIL087C	AIM19	2	3	1	743.089	2227.25	2.24699	HCD	21.4401	250	40.4153	10284	qExPlus02_00984.raw	8.29	34	27	4.57102e+06	0.02106	0.1582	19568.4	1.53565e+06	7.61565e+07	1.24428e+08	7.61565e+07	1.24428e+08	1.63384
Fusion_Acetyl	High	sAkPATDDAkDELLSPFRR	2	20	N-Term(Acetyl); K3(Dimethyl:2H(6)); K10(Dimethyl:2H(6))	1	1	YIL087C	AIM19	2	4	1	557.568	2227.25	1.72028	ETD	33.8341	50	4.36708	2534	Fusion002161.raw	29.31	34	27	1657433531	0	0.006573			0	0
Fusion_Acetyl	High	sAkPATDDAkDELLSPFRR	2	20	N-Term(Acetyl); K3(Dimethyl:2H(6)); K10(Dimethyl:2H(6))	1	1	YIL087C	AIM19	2	4	1	557.567	2227.24	-1.23934	ETD	46.1834	50	5.10436	2961	Fusion002161.raw	29.74	34	27	24799629	0	0.04352	1.27823e+07	24799629	1.27823e+07	24799629	1.27823e+07	24799629	1.94016
qe	High	tDDAkDELLSPFR	7	19	N-Term(Dimethyl:2H(6)); K5(Dimethyl:2H(6))	1	1	YIL087C	AIM19	1	2	1	787.943	1574.88	-1.46628	HCD	37.8971	250	45.1835	11450	qExPlus02_00984.raw	53.36	35	28	2.51169e+06	0	0.001079	4.91287e+06	2.51169e+06	4.91287e+06	2.51169e+06	4.91287e+06	2.51169e+06	0.511247
qe	High	rDNASSTTDIFR	31	42	N-Term(Dimethyl)	1	1	YJL131C	AIM23	1	2	1	705.851	1410.7	-1.29119	HCD	7.98925	250	22.1381	5417	qExPlus02_00984.raw	50.05	34	27	9.84814e+07	0	4.148e-06	9.84814e+07	8.12415e+07	9.84814e+07	8.12415e+07	9.84814e+07	8.12415e+07	0.824942
qe	High	iSLLSPQAAkTESNVVTkER	15	34	N-Term(Dimethyl:2H(6)); K10(Dimethyl:2H(6)); K18(Dimethyl:2H(6))	1	1	YJR080C	AIM24	2	3	1	758.474	2273.41	-0.760306	HCD	0	50.2693	33.1714	8339	qExPlus02_00984.raw	50.94	31	24	3.35133e+07	0	2.339e-07	132369322	3.35133e+07	132369322	3.35133e+07
qe	High	iSLLSPQAAkTESNVVTkER	15	34	N-Term(Dimethyl); K10(Dimethyl); K18(Dimethyl)	1	1	YJR080C	AIM24	2	3	1	752.434	2255.29	-3.76734	HCD	0	86.1399	33.498	8465	qExPlus02_00984.raw	47.12	33	26	20967879	0	3.07e-06	8.11531e+06		1.40485e+08	3.35133e+07	1.40485e+08	3.35133e+07	0.238555
qe	High	iENLSkDIATSR	37	48	N-Term(Dimethyl); K6(Dimethyl)	1	1	YJR080C	AIM24	1	2	1	701.898	1402.79	-1.34423	HCD	0	250	24.0314	5911	qExPlus02_00984.raw	18.93	36	29	472039	0.005141	0.0608	398162	9102.34	398162	9102.34	398162	9102.34	0.0228609
qe	High	sFDVTER	7	13	N-Term(Dimethyl)	1	1	YML030W	AIM31	0	2	1	441.222	881.436	0.0047373	HCD	18.11	250	23.3627	5830	qExPlus02_00983.raw	30.04	33	26	3.52963e+06	0.005141	0.06362	3.52963e+06	2.72834e+06	3.52963e+06	2.72834e+06	3.52963e+06	2.72834e+06	0.772983
qe_Acetyl	Medium	sISLLGR	2	8	N-Term(Acetyl)	1	1	YMR003W	AIM34	0	2	1	394.237	787.466	-1.65149	HCD	40.0282	250	59.5554	15504	qExPlus02_00982.raw	15.91	29	22	835839	0.0284	0.1871			0	0	0	0
qe	High	vNFYDDVDESkSHGEFPLIPVVLQNSSELSVR	2	33	N-Term(Dimethyl:2H(6)); K11(Dimethyl:2H(6))	1	1	YNL100W	AIM37	1	3	1	1229.98	3687.91	-4.36566	HCD	0	250	71.5474	17797	qExPlus02_00984.raw	52.26	34	27	1.61603e+06	0	6.957e-07	777635	753876	777635	753876	777635	753876	0.969446
Fusion	High	vNFYDDVDESkSHGEFPLIPVVLQNSSELSVR	2	33	N-Term(Dimethyl:2H(6)); K11(Dimethyl:2H(6))	1	1	YNL100W	AIM37	1	3	1	1229.99	3687.94	4.17413	HCD	0	139.997	41.1033	21450	Fusion002161.raw	35.89	21	14	3.30235e+06	0	0.001636	2.47805e+06	3.20565e+06	2.47805e+06	3.20565e+06	2.47805e+06	3.20565e+06	1.29362
qe	High	vNFYDDVDESkSHGEFPLIPVVLQNSSELSVR	2	33	N-Term(Dimethyl); K11(Dimethyl)	1	1	YNL100W	AIM37	1	4	1	919.722	3675.87	3.2722	HCD	7.68041	250	71.5765	17805	qExPlus02_00984.raw	31.55	34	27	114554	0	0.0003626	114554	154136	114554	154136	114554	154136	1.34552
Fusion	High	vNFYDDVDESkSHGEFPLIPVVLQNSSELSVR	2	33	N-Term(Dimethyl:2H(6)); K11(Dimethyl:2H(6))	1	1	YNL100W	AIM37	1	4	1	922.739	3687.93	0.976335	ETD	27.0163	50	42.4439	21960	Fusion002161.raw	17.33	21	14	5.8244e+06	0	0.2715	1.81387e+06	3.11712e+06	1.81387e+06	3.11712e+06	1.81387e+06	3.11712e+06	1.7185
Fusion	High	vNFYDDVDESkSHGEFPLIPVVLQNSSELSVR	2	33	N-Term(Dimethyl:2H(6)); K11(Dimethyl:2H(6))	1	1	YNL100W	AIM37	1	5	1	738.392	3687.93	0.774089	ETD	6.71622	50	41.0965	21447	Fusion002161.raw	17.79	21	14	5.03495e+06	0	0.1871	3.81884e+06	5.03495e+06	3.81884e+06	5.03495e+06	3.81884e+06	5.03495e+06	1.31845
Fusion	High	sHGEFPLIPVVLQNSSELSVR	13	33	N-Term(Dimethyl)	1	1	YNL100W	AIM37	0	3	1	779.425	2336.26	0.194686	HCD	23.5432	52.3652	36.4814	19549	Fusion002161.raw	38.27	24	17	3.28531e+06	0	0.01261	2.74758e+06	611357	2.74758e+06	611357	2.74758e+06	611357	0.222507
qe	High	vLQNSSELSVR	23	33	N-Term(Dimethyl)	1	1	YNL100W	AIM37	0	2	1	630.351	1259.7	-0.218134	HCD	0	111.032	25.8734	6617	qExPlus02_00983.raw	53.16	36	29	1.20928e+08	0	0.0001046	1.20928e+08	1.93154e+07	1.20928e+08	1.93154e+07
qe	High	vLQNSSELSVR	23	33	N-Term(Dimethyl)	1	1	YNL100W	AIM37	0	2	1	630.351	1259.69	-1.09028	HCD	49.4883	250	26.2055	6737	qExPlus02_00983.raw	15.41	36	29	1.05811e+06	0.005141	0.07256	564067	9102.34	1.21492e+08	1.93245e+07	1.21492e+08	1.93245e+07	0.15906
qe	High	qNSSELSVR	25	33	N-Term(Dimethyl)	1	1	YNL100W	AIM37	0	2	1	524.275	1047.54	0.215246	HCD	0	250	14.8226	3590	qExPlus02_00983.raw	43	34	27	2.86459e+06	0.0008655	0.01934	2.0268e+06		2.0268e+06	0	2.0268e+06	0
qe_Acetyl	High	mFkSLAAVLPR	1	11	N-Term(Acetyl); K3(Dimethyl:2H(6))	1	1	YPR004C	AIM45	1	2	1	654.902	1308.8	-0.934133	HCD	0	250	70.4376	18204	qExPlus02_00983.raw	50.55	32	25	396057	0	0.00137	19568.4	163700	19568.4	163700
qe_Acetyl	High	mFkSLAAVLPR	1	11	N-Term(Acetyl); K3(Dimethyl:2H(6))	1	1	YPR004C	AIM45	1	2	1	654.902	1308.8	-0.934133	HCD	3.62811	63.55	70.1549	18137	qExPlus02_00983.raw	63.49	32	25	90746478	0	0.0005588	3.14425e+06	85586679	3.16381e+06	8.57504e+07	3.16381e+06	8.57504e+07	27.1035
qe_Acetyl	High	mFkSLAAVLPR	1	11	N-Term(Acetyl); K3(Dimethyl:2H(6))	1	1	YPR004C	AIM45	1	3	1	436.937	1308.8	-1.15426	HCD	18.742	250	70.229	18155	qExPlus02_00983.raw	37.51	32	25	2.07251e+07	0.002723	0.07434	19568.4	10781108	19568.4	10781108
qe_Acetyl	High	mFkSLAAVLPR	1	11	N-Term(Acetyl); M1(Oxidation); K3(Dimethyl:2H(6))	1	1	YPR004C	AIM45	1	3	1	442.268	1324.79	-1.49449	HCD	31.2942	250	70.03	18108	qExPlus02_00983.raw	60.94	32	25	4.08742e+06	0	0.005396	19568.4	2655106	39136.7	13436214
qe_Acetyl	High	mFkSLAAVLPR	1	11	N-Term(Acetyl); M1(Oxidation); K3(Dimethyl:2H(6))	1	1	YPR004C	AIM45	1	3	1	442.269	1324.79	-0.941637	HCD	32.4319	190.18	58.7826	15382	qExPlus02_00983.raw	65.08	32	25	7.93828e+06	0	0.0009353			39136.7	13436214	39136.7	13436214	343.315
qe	High	aSTLAFIESSkDGSVSR	23	39	N-Term(Dimethyl:2H(6)); K11(Dimethyl:2H(6))	1	1	YPR004C	AIM45	1	2	1	912.018	1823.03	-1.00845	HCD	0	250	35.6502	9054	qExPlus02_00984.raw	46.07	35	28	2.30723e+06	0	1.687e-05	1.25433e+06	2.10165e+06	1.25433e+06	2.10165e+06
qe	High	aSTLAFIESSkDGSVSR	23	39	N-Term(Dimethyl:2H(6)); K11(Dimethyl:2H(6))	1	1	YPR004C	AIM45	1	2	1	912.02	1823.03	1.53604	HCD	4.19315	59.0986	35.9311	9126	qExPlus02_00984.raw	99.57	35	28	1.37912e+08	0	2.589e-06	1.50562e+08	1.37272e+08	1.51817e+08	1.39374e+08
qe	High	aSTLAFIESSkDGSVSR	23	39	N-Term(Dimethyl:2H(6)); K11(Dimethyl:2H(6))	1	1	YPR004C	AIM45	1	2	1	912.019	1823.03	0.933396	HCD	21.348	143.179	36.212	9198	qExPlus02_00984.raw	99.64	35	28	1.04437e+07	0	6.261e-08			1.51817e+08	1.39374e+08	1.51817e+08	1.39374e+08	0.918042
qe	High	aSTLAFIESSkDGSVSR	23	39	N-Term(Dimethyl:2H(6)); K11(Dimethyl:2H(6))	1	1	YPR004C	AIM45	1	3	1	608.349	1823.03	2.1313	HCD	11.6791	147.239	35.9546	9133	qExPlus02_00984.raw	65.12	35	28	2.92591e+07	0	1.492e-06	4.25013e+07	2.92591e+07	4.25013e+07	2.92591e+07
qe	High	aSTLAFIESSkDGSVSR	23	39	N-Term(Dimethyl:2H(6)); K11(Dimethyl:2H(6))	1	1	YPR004C	AIM45	1	3	1	608.348	1823.03	-0.279262	HCD	10.3626	239.397	36.2443	9206	qExPlus02_00984.raw	46.22	35	28	2.55499e+06	0	2.949e-05	1.87097e+07	2.07874e+06	6.1211e+07	3.13378e+07	6.1211e+07	3.13378e+07	0.511964
qe	Medium	skLGPLAR	2	9	N-Term(Dimethyl:2H(6)); K2(Dimethyl:2H(6))	1	1	YBR262C	AIM5	1	2	1	455.334	909.661	-2.30111	HCD	10.0306	250	16.1554	3929	qExPlus02_00984.raw	22.56	29	22	1.20541e+07	0.03266	0.3441	1.41683e+07	1.20541e+07	1.41683e+07	1.20541e+07	1.41683e+07	1.20541e+07	0.850783
qe_Acetyl	Medium	skLGPLAR	2	9	N-Term(Acetyl); K2(Dimethyl:2H(6))	1	1	YBR262C	AIM5	1	2	1	459.305	917.602	-2.69625	HCD	0	59.5442	27.6874	7286	qExPlus02_00983.raw	25.59	31	24	1138225617	0.02654	0.1796	1287998804	1138225617	1287998804	1138225617
qe_Acetyl	Medium	skLGPLAR	2	9	N-Term(Acetyl); K2(Dimethyl:2H(6))	1	1	YBR262C	AIM5	1	2	1	459.305	917.603	-2.23064	HCD	27.8613	127.389	28.4684	7585	qExPlus02_00983.raw	13.24	30	23	5.40841e+06	0.03233	0.2139	4.96185e+06	5.0373e+06	1.29296e+09	1.14326e+09
qe_Acetyl	Medium	skLGPLAR	2	9	N-Term(Acetyl); K2(Dimethyl:2H(6))	1	1	YBR262C	AIM5	1	2	1	459.305	917.603	-1.63199	HCD	31.7989	22.2934	28.2083	7489	qExPlus02_00983.raw	21.72	29	22	2.07779e+07	0.01487	0.1304	1.9231e+07	2.07779e+07	1.31219e+09	1.16404e+09	1.31219e+09	1.16404e+09	0.887097
qe_Acetyl	High	mFSRSTLcLkTSASSIGR	1	18	N-Term(Acetyl); C8(Carbamidomethyl); K10(Dimethyl:2H(6))	1	1	YOR374W	ALD4	2	3	1	693.37	2078.1	-2.02221	HCD	27.245	250	44.7977	11943	qExPlus02_00983.raw	17.17	35	28	2.21434e+06	0	0.01595	19568.4	927694	19568.4	927694
qe_Acetyl	High	mFSRSTLcLkTSASSIGR	1	18	N-Term(Acetyl); C8(Carbamidomethyl); K10(Dimethyl:2H(6))	1	1	YOR374W	ALD4	2	3	1	693.371	2078.1	-1.05297	HCD	1.46482	60.3433	44.8364	11369	qExPlus02_00984.raw	44.93	35	28	1.28009e+07	0	2.166e-06	19568.4	4094690	39136.7	5.02238e+06	39136.7	5.02238e+06	128.329
qe_Acetyl	High	sTLcLkTSASSIGR	5	18	N-Term(Acetyl); C4(Carbamidomethyl); K6(Dimethyl:2H(6))	1	1	YOR374W	ALD4	1	2	1	778.931	1556.85	-2.35555	HCD	3.98453	145.047	38.7163	10490	qExPlus02_00983.raw	76.98	35	28	23227213	0	2.714e-05	19568.4	10536864	19568.4	10536864	19568.4	10536864	538.464
qe	High	tSASSIGRLQLR	11	22	N-Term(Dimethyl:2H(6))	1	1	YOR374W	ALD4	1	2	1	661.904	1322.8	-0.894639	HCD	2.86786	250	26.6492	6589	qExPlus02_00984.raw	18.46	34	27	7.10286e+06	0.00358	0.1378	9102.34	3841123	9102.34	3841123	9102.34	3841123	421.993
qe	High	eGREDDVEEAVQAADR	78	93	N-Term(Dimethyl:2H(6))	1	1	YOR374W	ALD4	1	2	1	911.938	1822.87	-0.0556806	HCD	0	250	30.0469	7475	qExPlus02_00984.raw	75.13	31	24	3.79636e+06	0	1.767e-08	9102.34	1.53061e+06	9102.34	1.53061e+06	9102.34	1.53061e+06	168.156
qe_Acetyl	High	eDDVEEAVQAADR	81	93	N-Term(Acetyl)	1	1	YOR374W	ALD4	0	2	1	744.823	1488.64	-4.78869	HCD	0	250	52.5417	13718	qExPlus02_00982.raw	83.05	30	23	1.32507e+06	0	0.002696			0	0	0	0
qe_Acetyl	High	aFSNGSWNGIDPIDR	94	108	N-Term(Acetyl)	1	1	YOR374W	ALD4	0	2	1	845.894	1690.78	-1.19434	HCD	12.4548	250	65.9501	17147	qExPlus02_00983.raw	87.1	32	25	4.70177e+06	0	7.662e-05			0	0
qe_Acetyl	High	aFSNGSWNGIDPIDR	94	108	N-Term(Acetyl)	1	1	YOR374W	ALD4	0	2	1	845.895	1690.78	-0.039177	HCD	0	50.6579	58.1261	15221	qExPlus02_00983.raw	52.59	32	25	208293461	0	0.002836			0	0
qe_Acetyl	High	aFSNGSWNGIDPIDR	94	108	N-Term(Acetyl)	1	1	YOR374W	ALD4	0	2	1	845.894	1690.78	-0.688955	HCD	12.4516	250	58.4143	15288	qExPlus02_00983.raw	42.71	33	26	718208	0.006948	0.1104			0	0
qe_Acetyl	Medium	aFSNGSWNGIDPIDR	94	108	N-Term(Acetyl)	1	1	YOR374W	ALD4	0	2	1	845.894	1690.78	-1.19434	HCD	0	29.6641	54.7328	14384	qExPlus02_00983.raw	14.66	33	26	8.72813e+07	0.03047	0.2551			0	0	0	0
qe_Acetyl	High	aFSNGSWNGIDPIDR	94	108	N-Term(Acetyl)	1	1	YOR374W	ALD4	0	3	1	564.266	1690.78	0.205562	HCD	13.0643	250	58.0025	15191	qExPlus02_00983.raw	37.83	32	25	5.78547e+06	0	0.01157			0	0	0	0
qe	High	sNGSWNGIDPIDR	96	108	N-Term(Dimethyl)	1	1	YOR374W	ALD4	0	2	1	729.85	1458.69	-2.75502	HCD	44.6614	250	41.9452	11265	qExPlus02_00983.raw	45.42	33	26	9.81675e+06	0	0.000129	9.81675e+06	1.39505e+07	9.81675e+06	1.39505e+07	9.81675e+06	1.39505e+07	1.42109
qe	High	gSWNGIDPIDR	98	108	N-Term(Dimethyl)	1	1	YOR374W	ALD4	0	2	1	629.313	1257.62	-2.3183	HCD	0	250	42.8068	11468	qExPlus02_00983.raw	63.3	33	26	8.82255e+06	0	0.0003459	8.82255e+06	1.03485e+07	8.82255e+06	1.03485e+07	8.82255e+06	1.03485e+07	1.17296
qe	High	sWNGIDPIDR	99	108	N-Term(Dimethyl)	1	1	YOR374W	ALD4	0	2	1	600.804	1200.6	0.197899	HCD	15.8389	195.06	43.9223	11733	qExPlus02_00983.raw	42.36	33	27	1.00501e+07	0	0.005742	9.94313e+06	1.05304e+07	9.94313e+06	1.05304e+07	9.94313e+06	1.05304e+07	1.05906
qe	High	sSSWIVAQNHR	65	75	N-Term(Dimethyl:2H(6))	1	1	YLR089C	ALT1	0	2	1	659.859	1318.71	-2.04783	HCD	0	250	20.168	4922	qExPlus02_00984.raw	68.31	34	27	1.39259e+07	0	0.0004079	9102.34	7.22449e+06	9102.34	7.22449e+06	9102.34	7.22449e+06	793.696
qe	High	lSGQSSLNDLR	78	88	N-Term(Dimethyl)	1	1	YLR089C	ALT1	0	1	1	1217.65	1217.65	-2.30827	HCD	0	230.87	28.2584	7508	qExPlus02_00983.raw	66.15	36	29	10493536	0	0.000855	5.78791e+06		5.78791e+06	0	5.78791e+06	0
qe	High	lSGQSSLNDLR	78	88	N-Term(Dimethyl:2H(6))	1	1	YLR089C	ALT1	0	2	1	612.345	1223.68	-2.30976	HCD	8.83915	122.603	28.1163	7454	qExPlus02_00983.raw	20.84	35	28	1.0674e+08	0	0.01086	396372230	1.0674e+08	396372230	1.0674e+08	396372230	1.0674e+08	0.269293
qe	High	sGQSSLNDLR	79	88	N-Term(Dimethyl:2H(6))	1	1	YLR089C	ALT1	0	2	1	555.805	1110.6	1.37366	HCD	10.943	250	19.208	4730	qExPlus02_00983.raw	42.76	34	27	7.70919e+06	0	0.06227	5.50283e+06	7.70919e+06	5.50283e+06	7.70919e+06	5.50283e+06	7.70919e+06	1.40095
qe	High	lSNVYSPPAGVSR	36	48	N-Term(Dimethyl:2H(6))	1	1	YKL157W	APE2	0	2	1	690.89	1380.77	-2.25132	HCD	0	176.612	32.9213	9003	qExPlus02_00983.raw	23.8	35	28	2.00211e+07	0	0.03065	9102.34	11072816	9102.34	11072816	9102.34	11072816	1216.48
qe	High	sNVYSPPAGVSR	37	48	N-Term(Dimethyl:2H(6))	1	1	YKL157W	APE2	0	2	1	634.35	1267.69	0.788292	HCD	73.6377	250	25.5539	6525	qExPlus02_00983.raw	25.93	35	28	3.76256e+06	0.001946	0.09104	9102.34	2.3307e+06	9102.34	2.3307e+06	9102.34	2.3307e+06	256.055
qe	High	fASVPLR	33	39	N-Term(Dimethyl:2H(6))	1	1	YER069W	ARG5.6	0	2	1	412.269	823.53	-1.14036	HCD	4.67078	75.2001	31.2767	8506	qExPlus02_00983.raw	28.89	32	25	2.98414e+07	0.005861	0.1854	9102.34	19941274	9102.34	19941274	9102.34	19941274	2190.79
qe	High	vSSTNGFSATR	58	68	N-Term(Dimethyl:2H(6))	1	1	YER069W	ARG5.6	0	2	1	580.813	1160.62	0.977344	HCD	7.30047	250	17.1541	4207	qExPlus02_00983.raw	53.35	33	26	2.38885e+07	0	0.001874	2.56479e+07	2.38885e+07	2.56479e+07	2.38885e+07	2.56479e+07	2.38885e+07	0.9314
qe	High	mRISSTLLQR	1	10	N-Term(Dimethyl:2H(6)); M1(Oxidation)	1	1	YMR062C	ARG7	1	2	1	627.876	1254.74	-2.47549	HCD	0	250	22.2907	5458	qExPlus02_00984.raw	10.94	34	27	3.03232e+06	0.005861	0.1837	9102.34	1.63735e+06	9102.34	1.63735e+06	9102.34	1.63735e+06	179.883
qe	High	fTSILEEkAFQVTTYSRPEDLcITR	14	38	N-Term(Dimethyl); K8(Dimethyl); C22(Carbamidomethyl)	1	1	YOL140W	ARG8	1	3	1	1020.86	3060.57	1.08712	HCD	0	250	57.8206	14528	qExPlus02_00984.raw	21.79	36	29	814864	0	0.0009772	147030	9102.34	147030	9102.34	147030	9102.34	0.0619081
Fusion	High	fTSILEEkAFQVTTYSRPEDLcITR	14	38	N-Term(Dimethyl); K8(Dimethyl); C22(Carbamidomethyl)	1	1	YOL140W	ARG8	1	4	1	765.897	3060.57	-1.07105	ETD	1.07077	50	25.4147	14293	Fusion002161.raw	28.23	22	15	2.64169e+07	0	0.1317	2.64169e+07	3.29876e+07	2.64169e+07	3.29876e+07	2.64169e+07	3.29876e+07	1.24873
qe_Acetyl	Medium	sFVQIR	2	7	N-Term(Acetyl)	1	1	YDR376W	ARH1	0	1	1	791.439	791.439	-2.35869	HCD	0	250	51.273	13379	qExPlus02_00982.raw	25.59	35	28	2.43959e+07	0.03726	0.301			0	0	0	0
qe_Acetyl	Medium	sFVQIR	2	7	N-Term(Acetyl)	1	1	YDR376W	ARH1	0	2	1	396.223	791.438	-3.76382	HCD		250	51.5265	13449	qExPlus02_00982.raw	30.84	34	27	22496472	0.01294	0.1284			0	0	0	0
qe	High	dSSEGEFISENNDQSR	20	35	N-Term(Dimethyl)	1	1	YNR002C	ATO2	0	2	1	921.391	1841.77	-2.27322	HCD	0	250	32.2139	8789	qExPlus02_00983.raw	113.27	25	18	1.00028e+07	0	3.944e-08	9.82321e+06	2.80338e+06	9.82321e+06	2.80338e+06	9.82321e+06	2.80338e+06	0.285383
qe	High	iYTAGkNNEYIYIGR	44	58	N-Term(Dimethyl); K6(Dimethyl)	1	1	YNR002C	ATO2	1	2	1	915.993	1830.98	2.48938	HCD	0	247.095	34.1521	8652	qExPlus02_00984.raw	89.24	36	29	8.51962e+06	0	3.204e-09	8.51962e+06	1.82554e+06	8.51962e+06	1.82554e+06	8.51962e+06	1.82554e+06	0.214274
qe	High	tAGkNNEYIYIGR	46	58	N-Term(Dimethyl:2H(6)); K4(Dimethyl:2H(6))	1	1	YNR002C	ATO2	1	2	1	783.951	1566.9	-4.6946	HCD	0	250	25.0172	6177	qExPlus02_00984.raw	37.57	35	28	1.91034e+07	0	0.0004776	32460344	1.78481e+07	32460344	1.78481e+07
qe	High	tAGkNNEYIYIGR	46	58	N-Term(Dimethyl); K4(Dimethyl)	1	1	YNR002C	ATO2	1	2	1	777.917	1554.83	-0.488527	HCD	10.5749	250	25.3294	6251	qExPlus02_00984.raw	50.47	36	29	636249	0	0.000418		9102.34	32460344	1.78572e+07	32460344	1.78572e+07	0.550125
qe	High	gkNNEYIYIGR	48	58	N-Term(Dimethyl); K2(Dimethyl)	1	1	YNR002C	ATO2	1	2	1	691.874	1382.74	-1.37764	HCD	0	250	24.212	5954	qExPlus02_00984.raw	53.65	35	28	1.69264e+06	0	0.0002463	1.56099e+06	264091	1.56099e+06	264091	1.56099e+06	264091	0.169182
qe	High	gVSQGFPNIQEIYSDR	32	47	N-Term(Dimethyl:2H(6))	1	1	YDR384C	ATO3	0	2	1	922.475	1843.94	-1.16948	HCD	25.6418	250	55.8155	14661	qExPlus02_00983.raw	90.43	34	27	4.41031e+06	0	2.51e-06	1.29028e+07	4.41031e+06	1.29028e+07	4.41031e+06	1.29028e+07	4.41031e+06	0.34181
qe	High	gVSQGFPNIQEIYSDRDFITLGSSTYR	32	58	N-Term(Dimethyl)	1	1	YDR384C	ATO3	1	3	1	1026.84	3078.51	-0.716019	HCD	0	250	67.9692	17624	qExPlus02_00983.raw	61.68	35	28	2.98223e+07	0	2.473e-06	2.89919e+07	9.33514e+06	2.89919e+07	9.33514e+06	2.89919e+07	9.33514e+06	0.321992
qe	High	sQGFPNIQEIYSDR	34	47	N-Term(Dimethyl)	1	1	YDR384C	ATO3	0	2	1	841.412	1681.82	-0.280886	HCD	6.69973	197.184	53.0464	13990	qExPlus02_00983.raw	107.52	34	28	2.27626e+07	0	5.688e-08	2.10878e+07	6.36157e+06	2.10878e+07	6.36157e+06	2.10878e+07	6.36157e+06	0.30167
qe	High	sQGFPNIQEIYSDRDFITLGSSTYR	34	58	N-Term(Dimethyl)	1	1	YDR384C	ATO3	1	3	1	974.814	2922.43	-0.0743699	HCD	11.8026	250	66.868	17363	qExPlus02_00983.raw	23.93	35	28	3.64972e+07	0	0.0009865	3.64972e+07	1.34046e+07	3.64972e+07	1.34046e+07	3.64972e+07	1.34046e+07	0.367276
qe_Acetyl	High	tLINSTkAAR	14	23	N-Term(Acetyl); K7(Dimethyl:2H(6))	1	1	YBL099W	ATP1	1	2	1	575.856	1150.71	-0.536362	HCD	3.10847	105.677	25.8582	6612	qExPlus02_00983.raw	44.75	33	26	3.38699e+07	0	0.007896	19568.4	20190886	19568.4	20190886	19568.4	20190886	1031.81
qe	High	lASTkAQPTEVSSILEER	35	52	N-Term(Dimethyl); K5(Dimethyl)	1	1	YBL099W	ATP1	1	3	1	672.377	2015.12	7.77992	HCD	60.732	250	38.6841	9218	qExPlus02_00989.raw	63.17	35	28	1.17666e+06	0	0.0006124			0	0
qe	High	lASTkAQPTEVSSILEER	35	52	N-Term(Dimethyl); K5(Dimethyl)	1	1	YBL099W	ATP1	1	3	1	672.366	2015.08	-9.5756	HCD	88.6107	250	39.1446	9362	qExPlus02_00989.raw	8.33	36	29	4.19229e+06	0.0008655	0.02066	1.66399e+06	9102.34	1.66399e+06	9102.34	1.66399e+06	9102.34	0.0054702
qe_Acetyl	High	lASTkAQPTEVSSILEER	35	52	N-Term(Acetyl); K5(Dimethyl:2H(6))	1	1	YBL099W	ATP1	1	3	1	679.047	2035.13	4.18499	HCD	33.1559	250	39.1541	9364	qExPlus02_00989.raw	48.42	35	28	1.9203e+06	0	0.01579	19568.4	1.50505e+06	19568.4	1.50505e+06	19568.4	1.50505e+06	76.9123
qe	High	aSTkAQPTEVSSILEER	36	52	N-Term(Dimethyl); K4(Dimethyl)	1	1	YBL099W	ATP1	1	2	1	951.511	1902.02	-1.27136	HCD	1.70911	0.548797	33.2398	8365	qExPlus02_00984.raw	86.69	36	29	11896831032	0	2.155e-06	11879923552	2796321800	11879923552	2796321800
qe	High	aSTkAQPTEVSSILEER	36	52	N-Term(Dimethyl); K4(Dimethyl)	1	1	YBL099W	ATP1	1	2	1	951.512	1902.02	-1.01464	HCD	0.900456	0.808941	33.496	8464	qExPlus02_00984.raw	105	36	29	751029692	0	1.936e-11	745024816	197473884	12624948368	2993795684
qe	High	aSTkAQPTEVSSILEER	36	52	N-Term(Dimethyl); K4(Dimethyl)	1	1	YBL099W	ATP1	1	2	1	951.512	1902.02	-0.116127	HCD	11.9601	95.2722	34.0372	8619	qExPlus02_00984.raw	89.08	36	29	4.27796e+07	0	3.336e-09	4.14007e+07	1.91008e+07	1.26663e+10	3.0129e+09
qe	High	aSTkAQPTEVSSILEER	36	52	N-Term(Dimethyl); K4(Dimethyl)	1	1	YBL099W	ATP1	1	2	1	951.511	1902.02	-1.143	HCD	13.2195	154.75	34.3054	8690	qExPlus02_00984.raw	89.06	36	29	2.30303e+07	0	1.505e-10	22499400	1.05882e+07	1.26888e+10	3.02348e+09
qe	High	aSTkAQPTEVSSILEER	36	52	N-Term(Dimethyl); K4(Dimethyl)	1	1	YBL099W	ATP1	1	2	1	951.512	1902.02	-0.565383	HCD	0	250	34.5842	8761	qExPlus02_00984.raw	43.28	36	29	4.23395e+06	0	1.451e-06	4.23395e+06	2.21179e+06	1.26931e+10	3.0257e+09
qe	High	aSTkAQPTEVSSILEER	36	52	N-Term(Dimethyl:2H(6)); K4(Dimethyl:2H(6))	1	1	YBL099W	ATP1	1	2	1	957.548	1914.09	-2.15859	HCD	0	250	34.8409	8839	qExPlus02_00984.raw	88.79	35	28	6.1996e+06	0	3.14e-09	9.85002e+06	6.1996e+06	1.27029e+10	3.0319e+09
qe	High	aSTkAQPTEVSSILEER	36	52	N-Term(Dimethyl:2H(6)); K4(Dimethyl:2H(6))	1	1	YBL099W	ATP1	1	2	1	957.549	1914.09	-0.819326	HCD	17.959	250	35.2318	8939	qExPlus02_00984.raw	46.17	36	29	5.67998e+06	0	1.316e-05	9102.34	2.44034e+06	1.27029e+10	3.03434e+09
qe	High	aSTkAQPTEVSSILEER	36	52	N-Term(Dimethyl); K4(Dimethyl)	1	1	YBL099W	ATP1	1	2	1	951.512	1902.02	-0.629562	HCD	7.261	250	35.855	9105	qExPlus02_00984.raw	64.37	36	29	990346	0	1.521e-07			1.27029e+10	3.03434e+09
qe	High	aSTkAQPTEVSSILEER	36	52	N-Term(Dimethyl); K4(Dimethyl)	1	1	YBL099W	ATP1	1	2	1	951.512	1902.02	-0.372845	HCD	0	250	37.1384	9450	qExPlus02_00984.raw	66.67	36	29	3.77873e+06	0	2.82e-08	1.95062e+06		1.27049e+10	3.03434e+09
qe	High	aSTkAQPTEVSSILEER	36	52	N-Term(Dimethyl); K4(Dimethyl)	1	1	YBL099W	ATP1	1	2	1	951.511	1902.01	-1.78479	HCD	0	137.873	38.3181	9128	qExPlus02_00989.raw	88.68	36	29	4.25715e+06	0	8.974e-11	3.98916e+06	2.77504e+06	1.27089e+10	3.03711e+09
qe	High	aSTkAQPTEVSSILEER	36	52	N-Term(Dimethyl); K4(Dimethyl)	1	1	YBL099W	ATP1	1	2	1	951.51	1902.01	-2.55494	HCD	12.244	33.6558	38.5976	9196	qExPlus02_00989.raw	98.52	36	29	2.12775e+08	0	1.811e-09	2.11749e+08	1.11045e+08	1.29206e+10	3.14816e+09
qe	High	aSTkAQPTEVSSILEER	36	52	N-Term(Dimethyl:2H(6)); K4(Dimethyl:2H(6))	1	1	YBL099W	ATP1	1	2	1	957.547	1914.09	-3.68918	HCD	0	42.2602	38.8207	9266	qExPlus02_00989.raw	71.25	35	28	2.48809e+08	0	8.205e-08	474687197	2.48809e+08	1.33953e+10	3.39697e+09
qe	High	aSTkAQPTEVSSILEER	36	52	N-Term(Dimethyl:2H(6)); K4(Dimethyl:2H(6))	1	1	YBL099W	ATP1	1	2	1	957.548	1914.09	-2.28614	HCD	14.2488	250	39.0867	9347	qExPlus02_00989.raw	51.36	35	28	1.22297e+07	0	1.567e-06	1.49898e+07	10739066	1.34103e+10	3.40771e+09
qe	High	aSTkAQPTEVSSILEER	36	52	N-Term(Dimethyl); K4(Dimethyl)	1	1	YBL099W	ATP1	1	2	1	951.511	1902.02	-1.20718	HCD	33.0968	250	39.406	9439	qExPlus02_00989.raw	50.71	36	29	3.68989e+06	0	9.433e-06	3.68989e+06	6.07723e+06	1.3414e+10	3.41378e+09
qe	High	aSTkAQPTEVSSILEER	36	52	N-Term(Dimethyl:2H(6)); K4(Dimethyl:2H(6))	1	1	YBL099W	ATP1	1	2	1	957.549	1914.09	-1.1382	HCD	0	182.84	39.6102	9501	qExPlus02_00989.raw	11.46	36	29	6.97572e+06	0.00358	0.1398			1.3414e+10	3.41378e+09	1.3414e+10	3.41378e+09	0.254494
qe	High	aSTkAQPTEVSSILEER	36	52	N-Term(Dimethyl:2H(6)); K4(Dimethyl:2H(6))	1	1	YBL099W	ATP1	1	3	1	638.701	1914.09	-3.05846	HCD	5.64893	0.333305	33.213	8353	qExPlus02_00984.raw	98.25	35	28	2.43489e+09	0	1.901e-05	6.50615e+09	2.43489e+09	6.50615e+09	2.43489e+09
qe	High	aSTkAQPTEVSSILEER	36	52	N-Term(Dimethyl); K4(Dimethyl)	1	1	YBL099W	ATP1	1	3	1	634.677	1902.02	-0.444094	HCD	2.20604	0.236682	33.2316	8361	qExPlus02_00984.raw	97.73	36	29	20348029906	0	2.76e-06	20348029906	5.59242e+09	2.68542e+10	8.02731e+09
qe	High	aSTkAQPTEVSSILEER	36	52	N-Term(Dimethyl); K4(Dimethyl)	1	1	YBL099W	ATP1	1	3	1	634.677	1902.02	-0.251556	HCD	0.735026	0.325435	33.4948	8463	qExPlus02_00984.raw	98.54	36	29	4546993194	0	5.059e-05	4419500448	242676690	3.12737e+10	8.26999e+09
qe	High	aSTkAQPTEVSSILEER	36	52	N-Term(Dimethyl:2H(6)); K4(Dimethyl:2H(6))	1	1	YBL099W	ATP1	1	3	1	638.702	1914.09	-0.37993	HCD	31.7743	21.1516	34.0351	8618	qExPlus02_00984.raw	97.37	35	28	5.81053e+07	0	5.612e-06		21109332	3.12737e+10	8.2911e+09
qe	High	aSTkAQPTEVSSILEER	36	52	N-Term(Dimethyl); K4(Dimethyl)	1	1	YBL099W	ATP1	1	3	1	634.677	1902.02	-0.251556	HCD	3.22614	27.6279	34.3003	8688	qExPlus02_00984.raw	100.57	36	29	7.49481e+07	0	2.358e-09	7.418e+07	3.44585e+07	3.13479e+10	8.32555e+09
qe	High	aSTkAQPTEVSSILEER	36	52	N-Term(Dimethyl); K4(Dimethyl)	1	1	YBL099W	ATP1	1	3	1	634.677	1902.02	-0.0590175	HCD	10.8085	57.2108	34.5685	8757	qExPlus02_00984.raw	85	36	29	1.28964e+07	0	2.337e-08	1.2418e+07	6.79756e+06	3.13603e+10	8.33235e+09
qe	High	aSTkAQPTEVSSILEER	36	52	N-Term(Dimethyl:2H(6)); K4(Dimethyl:2H(6))	1	1	YBL099W	ATP1	1	3	1	638.702	1914.09	-1.43221	HCD	0	65.3287	34.8526	8843	qExPlus02_00984.raw	84.88	36	29	1.94768e+07	0	4.092e-06			3.13603e+10	8.33235e+09
qe	High	aSTkAQPTEVSSILEER	36	52	N-Term(Dimethyl); K4(Dimethyl)	1	1	YBL099W	ATP1	1	3	1	634.677	1902.02	-0.925439	HCD	28.973	130.383	35.1057	8909	qExPlus02_00984.raw	69.22	36	29	3.76305e+07	0	6.159e-05			3.13603e+10	8.33235e+09
qe	High	aSTkAQPTEVSSILEER	36	52	N-Term(Dimethyl:2H(6)); K4(Dimethyl:2H(6))	1	1	YBL099W	ATP1	1	3	1	638.701	1914.09	-2.77147	HCD	37.8449	92.5121	35.8306	9098	qExPlus02_00984.raw	45.49	35	28	9.52735e+06	0	0.006648		3.30708e+06	3.13603e+10	8.33566e+09
qe	High	aSTkAQPTEVSSILEER	36	52	N-Term(Dimethyl); K4(Dimethyl)	1	1	YBL099W	ATP1	1	3	1	634.679	1902.02	2.44398	HCD	69.3799	250	36.2198	9200	qExPlus02_00984.raw	27.98	36	29	2199919	0	0.0004628	2199919	1504672	3.13625e+10	8.33716e+09
qe	High	aSTkAQPTEVSSILEER	36	52	N-Term(Dimethyl); K4(Dimethyl)	1	1	YBL099W	ATP1	1	3	1	634.677	1902.02	-1.31052	HCD	27.831	250	36.8837	9385	qExPlus02_00984.raw	43.94	36	29	3.07163e+06	0	0.0002079	3.07163e+06	1.64154e+06	3.13655e+10	8.33881e+09
qe	High	aSTkAQPTEVSSILEER	36	52	N-Term(Dimethyl); K4(Dimethyl)	1	1	YBL099W	ATP1	1	3	1	634.677	1902.02	-1.31052	HCD	31.1515	199.409	37.2051	9468	qExPlus02_00984.raw	96.08	36	29	9.35754e+06	0	2.767e-07	8.59249e+06	4.48754e+06	3.13741e+10	8.34329e+09
qe	High	aSTkAQPTEVSSILEER	36	52	N-Term(Dimethyl:2H(6)); K4(Dimethyl:2H(6))	1	1	YBL099W	ATP1	1	3	1	638.701	1914.09	-2.67581	HCD	74.6982	250	37.3477	9503	qExPlus02_00984.raw	90	35	28	647143	0	3.296e-05			3.13741e+10	8.34329e+09
qe	High	aSTkAQPTEVSSILEER	36	52	N-Term(Dimethyl); K4(Dimethyl)	1	1	YBL099W	ATP1	1	3	1	634.676	1902.01	-2.65828	HCD	10.1987	250	38.7019	9833	qExPlus02_00984.raw	67.23	36	29	7.14409e+06	0	0.000175	6736787	1.56274e+06	3.13809e+10	8.34486e+09
qe	High	aSTkAQPTEVSSILEER	36	52	N-Term(Dimethyl); K4(Dimethyl)	1	1	YBL099W	ATP1	1	3	1	634.676	1902.01	-2.46574	HCD	17.996	250	44.4728	11279	qExPlus02_00984.raw	32.85	36	29	634334	0	0.0002393	505173	581249	3.13814e+10	8.34544e+09
qe	High	aSTkAQPTEVSSILEER	36	52	N-Term(Dimethyl); K4(Dimethyl)	1	1	YBL099W	ATP1	1	3	1	634.676	1902.01	-2.94709	HCD	8.72671	250	51.8499	13089	qExPlus02_00984.raw	16.52	36	29	417075	0	0.004452	417075	354408	3.13818e+10	8.34579e+09
qe	High	aSTkAQPTEVSSILEER	36	52	N-Term(Dimethyl); K4(Dimethyl)	1	1	YBL099W	ATP1	1	3	1	634.677	1902.02	-0.82917	HCD	7.35173	250	52.1753	13168	qExPlus02_00984.raw	8.99	36	29	53525.4	0.0008655	0.0186		9102.34	3.13818e+10	8.3458e+09
qe	High	aSTkAQPTEVSSILEER	36	52	N-Term(Dimethyl); K4(Dimethyl)	1	1	YBL099W	ATP1	1	3	1	634.676	1902.01	-2.27321	HCD	9.76194	250	53.1892	13415	qExPlus02_00984.raw	48.18	36	29	343126	0	0.005547	294000	136156	3.13821e+10	8.34594e+09
qe	High	aSTkAQPTEVSSILEER	36	52	N-Term(Dimethyl); K4(Dimethyl)	1	1	YBL099W	ATP1	1	3	1	634.677	1902.02	-0.251556	HCD	26.2431	250	53.4914	13488	qExPlus02_00984.raw	45.27	36	29	1.076e+06	0	0.003119	925376	725499	3.1383e+10	8.34666e+09
qe	High	aSTkAQPTEVSSILEER	36	52	N-Term(Dimethyl); K4(Dimethyl)	1	1	YBL099W	ATP1	1	3	1	634.676	1902.01	-2.08067	HCD	0	250	53.8884	13583	qExPlus02_00984.raw	24.86	36	29	455912	0.005141	0.0572	131622	9102.34	3.13832e+10	8.34667e+09
qe	High	aSTkAQPTEVSSILEER	36	52	N-Term(Dimethyl); K4(Dimethyl)	1	1	YBL099W	ATP1	1	3	1	634.677	1902.02	-0.731672	HCD		250	54.5486	13740	qExPlus02_00984.raw	20.95	36	29	1.40258e+06	0.004135	0.03446	1.03342e+06	270318	3.13842e+10	8.34694e+09
qe	High	aSTkAQPTEVSSILEER	36	52	N-Term(Dimethyl); K4(Dimethyl)	1	1	YBL099W	ATP1	1	3	1	634.676	1902.01	-1.79186	HCD	27.5724	250	55.0715	13864	qExPlus02_00984.raw	56.28	36	29	2.28e+06	0	3.423e-06	1.91992e+06	1.18614e+06	3.13861e+10	8.34813e+09
qe	High	aSTkAQPTEVSSILEER	36	52	N-Term(Dimethyl); K4(Dimethyl)	1	1	YBL099W	ATP1	1	3	1	634.678	1902.02	1.09621	HCD	39.1746	250	55.3459	13929	qExPlus02_00984.raw	4.74	36	29	794258	0.0008655	0.01965	644779	241399	3.13867e+10	8.34837e+09
qe	High	aSTkAQPTEVSSILEER	36	52	N-Term(Dimethyl); K4(Dimethyl)	1	1	YBL099W	ATP1	1	3	1	634.676	1902.01	-2.56201	HCD	0	250	56.3134	14158	qExPlus02_00984.raw	56.33	36	29	437276	0	0.002028	437276	481102	3.13872e+10	8.34885e+09
qe	High	aSTkAQPTEVSSILEER	36	52	N-Term(Dimethyl); K4(Dimethyl)	1	1	YBL099W	ATP1	1	3	1	634.681	1902.03	5.8134	HCD		250	59.1373	14839	qExPlus02_00984.raw	23.16	36	29	99095.8	0.008862	0.1328	37345.6	9102.34	3.13872e+10	8.34886e+09
qe	Medium	aSTkAQPTEVSSILEER	36	52	N-Term(Dimethyl); K4(Dimethyl)	1	1	YBL099W	ATP1	1	3	1	634.676	1902.01	-1.59932	HCD	0	250	64.1987	16042	qExPlus02_00984.raw	28.21	36	29	52870.3	0.03217	0.3354	19568.4		3.13872e+10	8.34886e+09
qe	High	aSTkAQPTEVSSILEER	36	52	N-Term(Dimethyl); K4(Dimethyl)	1	1	YBL099W	ATP1	1	3	1	634.677	1902.02	-1.02171	HCD	26.499	250	64.5679	16129	qExPlus02_00984.raw	48.97	36	29	74563.1	0	0.0008298	74563.1	64489.5	3.13873e+10	8.34892e+09
qe	High	aSTkAQPTEVSSILEER	36	52	N-Term(Dimethyl); K4(Dimethyl)	1	1	YBL099W	ATP1	1	3	1	634.678	1902.02	0.133521	HCD		250	65.8371	16432	qExPlus02_00984.raw	55.07	36	29	69990.9	0	0.0002548	35264.2	9102.34	3.13874e+10	8.34893e+09
qe	High	aSTkAQPTEVSSILEER	36	52	N-Term(Dimethyl); K4(Dimethyl)	1	1	YBL099W	ATP1	1	3	1	634.678	1902.02	0.133521	HCD	0	250	66.1018	16494	qExPlus02_00984.raw	55.98	36	29	163552	0	0.00772	106083	9102.34	3.13875e+10	8.34894e+09
qe	High	aSTkAQPTEVSSILEER	36	52	N-Term(Dimethyl); K4(Dimethyl)	1	1	YBL099W	ATP1	1	3	1	634.676	1902.01	-2.36947	HCD	0	250	66.7524	16649	qExPlus02_00984.raw	35.9	36	29	80442.1	0.005141	0.0708	80442.1	79938.5	3.13875e+10	8.34902e+09
qe	Medium	aSTkAQPTEVSSILEER	36	52	N-Term(Dimethyl); K4(Dimethyl)	1	1	YBL099W	ATP1	1	3	1	634.676	1902.01	-2.27321	HCD	20.5065	250	67.5238	16835	qExPlus02_00984.raw	25.96	36	29	112790	0.01487	0.221	102965	30173.3	3.13876e+10	8.34905e+09
qe	High	aSTkAQPTEVSSILEER	36	52	N-Term(Dimethyl); K4(Dimethyl)	1	1	YBL099W	ATP1	1	3	1	634.676	1902.01	-2.27321	HCD	54.9406	250	68.4592	17056	qExPlus02_00984.raw	31.68	36	29	49242.2	0.007065	0.117	35690.5		3.13877e+10	8.34905e+09
qe	High	aSTkAQPTEVSSILEER	36	52	N-Term(Dimethyl); K4(Dimethyl)	1	1	YBL099W	ATP1	1	3	1	634.677	1902.02	-1.02171	HCD	60.3588	250	74.2238	18443	qExPlus02_00984.raw	34.95	36	29	178378	0	0.001581	103724	9102.34	3.13878e+10	8.34906e+09
qe	High	aSTkAQPTEVSSILEER	36	52	N-Term(Dimethyl); K4(Dimethyl)	1	1	YBL099W	ATP1	1	3	1	634.675	1902.01	-3.42843	HCD		250	75.2425	18686	qExPlus02_00984.raw	40.64	36	29	83087	0	0.0009946	39713.6	9102.34	3.13878e+10	8.34907e+09
qe	High	aSTkAQPTEVSSILEER	36	52	N-Term(Dimethyl); K4(Dimethyl)	1	1	YBL099W	ATP1	1	3	1	634.677	1902.02	-0.82917	HCD	0	250	80.4386	19927	qExPlus02_00984.raw	20.51	36	29	64901.5	0.0008655	0.02419	44674.9	9102.34	3.13879e+10	8.34908e+09
qe	High	aSTkAQPTEVSSILEER	36	52	N-Term(Dimethyl); K4(Dimethyl)	1	1	YBL099W	ATP1	1	3	1	634.677	1902.02	-1.02171	HCD	58.9212	250	93.9472	23184	qExPlus02_00984.raw	31.67	36	29	35573.2	0	0.006934			3.13879e+10	8.34908e+09
qe	High	aSTkAQPTEVSSILEER	36	52	N-Term(Dimethyl:2H(6)); K4(Dimethyl:2H(6))	1	1	YBL099W	ATP1	1	3	1	638.702	1914.09	-1.62353	HCD	24.6068	250	38.2193	9104	qExPlus02_00989.raw	83.56	36	29	1.22818e+07	0	0.000262	1.90512e+07	1.22818e+07	3.14069e+10	8.36136e+09
qe	High	aSTkAQPTEVSSILEER	36	52	N-Term(Dimethyl); K4(Dimethyl)	1	1	YBL099W	ATP1	1	3	1	634.676	1902.01	-2.08067	HCD	2.08443	6.33668	38.4767	9166	qExPlus02_00989.raw	91.66	36	29	314653709	0	1.903e-05	3.13991e+08	1.80607e+08	3.17209e+10	8.54197e+09
qe	High	aSTkAQPTEVSSILEER	36	52	N-Term(Dimethyl); K4(Dimethyl)	1	1	YBL099W	ATP1	1	3	1	634.675	1902.01	-3.13963	HCD	27.7663	3.38374	38.7319	9236	qExPlus02_00989.raw	86.11	36	29	8.73758e+08	0	1.686e-06			3.17209e+10	8.54197e+09
qe	High	aSTkAQPTEVSSILEER	36	52	N-Term(Dimethyl:2H(6)); K4(Dimethyl:2H(6))	1	1	YBL099W	ATP1	1	3	1	638.701	1914.09	-1.91052	HCD	23.9166	6.40047	38.7637	9248	qExPlus02_00989.raw	97.5	35	29	4.55681e+08	0	0.0001128			3.17209e+10	8.54197e+09
qe	High	aSTkAQPTEVSSILEER	36	52	N-Term(Dimethyl); K4(Dimethyl)	1	1	YBL099W	ATP1	1	3	1	634.676	1902.01	-1.79186	HCD	17.9103	16.756	38.9889	9320	qExPlus02_00989.raw	97.77	36	29	1.16077e+07	0	4.144e-07	1.16077e+07	7.75207e+06	3.17325e+10	8.54972e+09
qe	High	aSTkAQPTEVSSILEER	36	52	N-Term(Dimethyl); K4(Dimethyl)	1	1	YBL099W	ATP1	1	3	1	634.677	1902.02	-1.40678	HCD	8.74959	84.9487	39.2662	9402	qExPlus02_00989.raw	99.74	36	29	2.16073e+07	0	4.765e-08	2.16073e+07	24405938	3.17541e+10	8.57413e+09	3.17541e+10	8.57413e+09	0.270016
qe	High	sTkAQPTEVSSILEER	37	52	N-Term(Dimethyl); K3(Dimethyl)	1	1	YBL099W	ATP1	1	2	1	915.993	1830.98	-1.18495	HCD	0	14.9887	32.9675	8271	qExPlus02_00984.raw	93.67	36	29	2.49311e+08	0	8.785e-09	248797019	2.4445e+08	248797019	2.4445e+08
qe	High	sTkAQPTEVSSILEER	37	52	N-Term(Dimethyl:2H(6)); K3(Dimethyl:2H(6))	1	1	YBL099W	ATP1	1	2	1	922.031	1843.05	-1.11346	HCD	0	93.133	33.0166	8290	qExPlus02_00984.raw	72.52	35	28	1.57473e+07	0	1.882e-08			248797019	2.4445e+08	248797019	2.4445e+08	0.982527
qe	High	sTkAQPTEVSSILEER	37	52	N-Term(Dimethyl); K3(Dimethyl)	1	1	YBL099W	ATP1	1	3	1	610.998	1830.98	-1.42564	HCD	68.2481	70.2976	32.716	8184	qExPlus02_00984.raw	41.51	36	29	4.35228e+08	0	0.000816	434218650	446657658	434218650	446657658
qe	High	sTkAQPTEVSSILEER	37	52	N-Term(Dimethyl); K3(Dimethyl)	1	1	YBL099W	ATP1	1	3	1	610.997	1830.98	-1.52564	HCD	8.14572	14.449	32.9799	8278	qExPlus02_00984.raw	81.18	36	29	73835572	0	1.577e-05	73835572	2.04744e+07	508054222	4.67132e+08	508054222	4.67132e+08	0.919453
qe	High	tkAQPTEVSSILEER	38	52	N-Term(Dimethyl); K2(Dimethyl)	1	1	YBL099W	ATP1	1	2	1	872.477	1743.95	-0.86777	HCD		173.438	33.0789	8308	qExPlus02_00984.raw	72.27	36	29	1.67395e+07	0	9.958e-07	1.67395e+07	1.6414e+07	1.67395e+07	1.6414e+07	1.67395e+07	1.6414e+07	0.980557
qe	High	tkAQPTEVSSILEER	38	52	N-Term(Dimethyl); K2(Dimethyl)	1	1	YBL099W	ATP1	1	3	1	581.986	1743.94	-2.5554	HCD	0	247.964	33.0646	8304	qExPlus02_00984.raw	92.84	36	29	2.59065e+07	0	0.0002041	2.59065e+07	3.31312e+07	2.59065e+07	3.31312e+07	2.59065e+07	3.31312e+07	1.27888
qe	High	aQPTEVSSILEER	40	52	N-Term(Dimethyl)	1	1	YBL099W	ATP1	0	2	1	743.889	1486.77	-2.17327	HCD	2.35955	66.6811	42.6478	11430	qExPlus02_00983.raw	85.71	35	29	1.50309e+08	0	0.0002618	1.50054e+08	5.30361e+07	1.50054e+08	5.30361e+07
qe	High	aQPTEVSSILEER	40	52	N-Term(Dimethyl)	1	1	YBL099W	ATP1	0	2	1	743.889	1486.77	-2.8301	HCD	18.2984	250	42.921	11495	qExPlus02_00983.raw	38.14	35	28	176216	0.004135	0.03575			1.50054e+08	5.30361e+07	1.50054e+08	5.30361e+07	0.353448
qe	Medium	aQPTEVSSILEER	40	52	N-Term(Dimethyl:2H(6))	1	1	YBL099W	ATP1	0	3	1	498.274	1492.81	-2.80876	HCD	11.9928	250	42.4826	11390	qExPlus02_00983.raw	49.08	34	27	3.47886e+06	0.02246	0.2774	9.69391e+06	3.47886e+06	9.69391e+06	3.47886e+06	9.69391e+06	3.47886e+06	0.358871
qe	High	eVSSILEER	44	52	N-Term(Dimethyl)	1	1	YBL099W	ATP1	0	1	1	1089.57	1089.57	-3.60018	HCD	0	162.384	33.2825	9130	qExPlus02_00983.raw	71.1	35	28	1.04416e+07	0	0.0005033	6592940		6592940	0	6592940	0
qe	High	eVSSILEER	44	52	N-Term(Dimethyl)	1	1	YBL099W	ATP1	0	2	1	545.293	1089.58	-0.419539	HCD	81.3026	250	33.4658	9180	qExPlus02_00983.raw	13.98	36	29	1.64303e+08	0.005141	0.07437	1.63558e+08	2.49136e+07	1.63558e+08	2.49136e+07	1.63558e+08	2.49136e+07	0.152323
qe	High	sSILEER	46	52	N-Term(Dimethyl:2H(6))	1	1	YBL099W	ATP1	0	2	1	434.256	867.504	-1.67384	HCD	7.89887	250	20.2199	4987	qExPlus02_00983.raw	53.09	34	27	1.49266e+07	0	0.06222	3.56637e+07	1.49266e+07	3.56637e+07	1.49266e+07	3.56637e+07	1.49266e+07	0.418537
qe	Medium	sILEER	47	52	N-Term(Dimethyl)	1	1	YBL099W	ATP1	0	2	1	387.721	774.434	-1.49746	HCD	35.2699	112.796	18.8601	4635	qExPlus02_00983.raw	30.04	36	29	9.49049e+06	0.01674	0.2315	9.49049e+06	3.03207e+06	9.49049e+06	3.03207e+06	9.49049e+06	3.03207e+06	0.319485
qe	High	ikGVSDEANLNETGR	53	67	N-Term(Dimethyl); K2(Dimethyl)	1	1	YBL099W	ATP1	1	2	1	829.933	1658.86	-6.77805	HCD	0	250	37.2438	9478	qExPlus02_00984.raw	69.12	36	29	7.46016e+06	0	3.062e-06	3.30096e+06	9102.34	3.30096e+06	9102.34
qe	High	ikGVSDEANLNETGR	53	67	N-Term(Dimethyl); K2(Dimethyl)	1	1	YBL099W	ATP1	1	2	1	829.934	1658.86	-5.60066	HCD	0	250	46.4132	11742	qExPlus02_00984.raw	56.33	36	29	347645	0	0.0003387	254001	9102.34	3.55496e+06	18204.7	3.55496e+06	18204.7	0.00512092
qe_Acetyl	High	ikGVSDEANLNETGR	53	67	N-Term(Acetyl); K2(Dimethyl)	1	1	YBL099W	ATP1	1	2	1	836.926	1672.84	-3.15594	HCD	0	250	36.0128	9824	qExPlus02_00983.raw	80.9	36	29	1.26164e+07	0	3.323e-05	1.22714e+07	6.38781e+06	1.22714e+07	6.38781e+06	1.22714e+07	6.38781e+06	0.520543
Fusion	High	ikGVSDEANLNETGR	53	67	N-Term(Dimethyl); K2(Dimethyl)	1	1	YBL099W	ATP1	1	2	1	829.939	1658.87	0.433421	HCD	32.2243	46.311	9.07097	5250	Fusion002161.raw	69.9	24	17	3.17307e+06	0	0.001482		3532.53	0	3532.53	0	3532.53
qe	High	gVSDEANLNETGR	55	67	N-Term(Dimethyl)	1	1	YBL099W	ATP1	0	2	1	695.335	1389.66	1.39562	HCD	29.3665	250	21.5845	5355	qExPlus02_00983.raw	74.29	33	26	4.9333e+06	0	5.666e-05	4.9333e+06	3.41475e+06	4.9333e+06	3.41475e+06	4.9333e+06	3.41475e+06	0.692183
qe	High	sDEANLNETGR	57	67	N-Term(Dimethyl)	1	1	YBL099W	ATP1	0	2	1	617.288	1233.57	-0.973259	HCD		250	14.3164	3466	qExPlus02_00983.raw	71.37	30	23	104229	0	2.579e-05	88921.4		88921.4	0	88921.4	0
qe_Acetyl	High	vLAVGDGIAR	68	77	N-Term(Acetyl)	1	1	YBL099W	ATP1	0	2	1	506.793	1012.58	0.149347	HCD	0	250	52.6559	13899	qExPlus02_00983.raw	47.17	34	27	3.00268e+06	0.001447	0.04725			0	0
qe_Acetyl	High	vLAVGDGIAR	68	77	N-Term(Acetyl)	1	1	YBL099W	ATP1	0	2	1	506.792	1012.58	-2.62339	HCD	6.54056	90.554	68.6544	17715	qExPlus02_00982.raw	40.27	34	27	5.17069e+07	0.001447	0.03881			0	0	0	0
qe	High	sLNAQPLGTDNTIENNTPTETNR	24	46	N-Term(Dimethyl:2H(6))	1	1	YJL180C	ATP12	0	2	1	1267.63	2534.25	-2.95345	HCD	0	250	40.0553	10813	qExPlus02_00983.raw	131.51	33	26	6.66578e+06	0	1.731e-08	2.26254e+06	6.66578e+06	2.26254e+06	6.66578e+06	2.26254e+06	6.66578e+06	2.94615
qe	High	sLNAQPLGTDNTIENNTPTETNR	24	46	N-Term(Dimethyl:2H(6))	1	1	YJL180C	ATP12	0	3	1	845.422	2534.25	-3.00693	HCD	3.91685	250	39.9729	10793	qExPlus02_00983.raw	77.98	33	26	3.45742e+07	0	0.001035	9.75761e+06	21547255	9.75761e+06	21547255
qe	High	sLNAQPLGTDNTIENNTPTETNR	24	46	N-Term(Dimethyl)	1	1	YJL180C	ATP12	0	3	1	843.41	2528.22	-2.24066	HCD	1.16203	51.3583	40.1476	10837	qExPlus02_00983.raw	89.15	34	27	7.98708e+07	0	3.503e-08	78692204	4.20607e+07	8.84498e+07	6.3608e+07	8.84498e+07	6.3608e+07	0.719142
qe_Acetyl	Medium	mFPIASR	1	7	N-Term(Acetyl); M1(Oxidation)	1	1	YLR295C	ATP14	0	2	1	440.223	879.439	-0.813409	HCD	0	250	50.3867	12706	qExPlus02_00984.raw	29.62	34	27	661688	0.04362	0.2687			0	0
qe_Acetyl	Medium	mFPIASR	1	7	N-Term(Acetyl)	1	1	YLR295C	ATP14	0	2	1	432.225	863.442	-2.4764	HCD	1.80687	2.43923	65.1459	16861	qExPlus02_00982.raw	29.9	32	25	653710439	0.04293	0.2663			0	0
qe_Acetyl	Medium	mFPIASR	1	7	N-Term(Acetyl); M1(Oxidation)	1	1	YLR295C	ATP14	0	2	1	440.223	879.438	-1.43803	HCD	27.9775	250	64.897	16799	qExPlus02_00982.raw	26.48	33	26	5.92655e+07	0.0159	0.1413			0	0
qe_Acetyl	Medium	mFPIASR	1	7	N-Term(Acetyl); M1(Oxidation)	1	1	YLR295C	ATP14	0	2	1	440.222	879.437	-2.82608	HCD	37.5908	11.6062	65.1471	16862	qExPlus02_00982.raw	32.82	33	26	5.0844e+07	0.01654	0.1757			0	0
qe_Acetyl	Medium	mFPIASR	1	7	N-Term(Acetyl); M1(Oxidation)	1	1	YLR295C	ATP14	0	2	1	440.222	879.437	-2.34026	HCD	37.8332	64.5597	49.9415	13031	qExPlus02_00982.raw	35.7	34	27	2.07772e+08	0.01294	0.1236			0	0
qe_Acetyl	Medium	mFPIASR	1	7	N-Term(Acetyl); M1(Oxidation)	1	1	YLR295C	ATP14	0	2	1	440.222	879.437	-2.96488	HCD	0.486978	6.78936	50.2087	13111	qExPlus02_00982.raw	31.84	33	26	2.37645e+08	0.02819	0.2512			0	0
qe_Acetyl	Medium	mFPIASR	1	7	N-Term(Acetyl); M1(Oxidation)	1	1	YLR295C	ATP14	0	2	1	440.222	879.437	-2.40966	HCD	0	250	54.267	14146	qExPlus02_00982.raw	34.03	34	27	1.2748e+06	0.02106	0.1572			0	0
qe_Acetyl	Medium	mFPIASR	1	7	N-Term(Acetyl); M1(Oxidation)	1	1	YLR295C	ATP14	0	2	1	440.222	879.436	-3.93651	HCD	62.5291	250	52.8856	13805	qExPlus02_00982.raw	14.12	33	26	590158	0.01654	0.1654			0	0
qe_Acetyl	Medium	mFPIASR	1	7	N-Term(Acetyl); M1(Oxidation)	1	1	YLR295C	ATP14	0	2	1	440.222	879.437	-2.27086	HCD	0	250	50.7464	13249	qExPlus02_00982.raw	34.63	34	27	1.07383e+06	0.02012	0.1498			0	0
qe_Acetyl	Medium	mFPIASR	1	7	N-Term(Acetyl); M1(Oxidation)	1	1	YLR295C	ATP14	0	2	1	440.223	879.438	-1.36863	HCD	0	250	53.1505	13876	qExPlus02_00982.raw	30.98	35	28	4.57299e+06	0.01654	0.1799			0	0	0	0
qe	High	vIQDLYLR	34	41	N-Term(Dimethyl:2H(6))	1	1	YLR295C	ATP14	0	2	1	527.333	1053.66	0.490418	HCD	27.316	243.969	39.6101	10709	qExPlus02_00983.raw	12.42	33	26	17344718	0.00358	0.1278	8.93139e+06	17344718	8.93139e+06	17344718	8.93139e+06	17344718	1.942
qe	High	sQTDAFYTQYkNGTAASEPTPITk	39	62	N-Term(Dimethyl); K11(Dimethyl); K24(Dimethyl)	1	1	YPL271W	ATP15	1	3	1	901.78	2703.33	-9.49446	HCD	13.2949	250	49.1366	13013	qExPlus02_00983.raw	4.67	35	28	773455	0.008407	0.127		9102.34	0	9102.34	0	9102.34
Fusion_Acetyl	High	mLRSIIGkSASR	1	12	N-Term(Acetyl); K8(Dimethyl:2H(6))	1	1	YDL004W	ATP16	2	3	1	465.619	1394.84	1.22596	ETD	10.8471	50	5.76665	3340	Fusion002161.raw	48.97	32	26	1.39677e+07	0	0.001611	2297.14	7019457	2297.14	7019457	2297.14	7019457	3055.74
qe_Acetyl	High	sIIGkSASR	4	12	N-Term(Acetyl); K5(Dimethyl:2H(6))	1	1	YDL004W	ATP16	1	2	1	497.811	994.615	-0.77064	HCD	0	250	22.0681	5485	qExPlus02_00983.raw	37.02	32	25	2.94325e+06	0.001447	0.02094	19568.4	2.24762e+06	19568.4	2.24762e+06	19568.4	2.24762e+06	114.86
qe_Acetyl	Medium	sLNFVAkR	13	20	N-Term(Acetyl); K7(Dimethyl:2H(6))	1	1	YDL004W	ATP16	1	2	1	505.816	1010.62	-1.40092	HCD	14.2069	250	37.531	10211	qExPlus02_00983.raw	21.9	33	26	7.61708e+06	0.01294	0.123	19568.4	4.20619e+06	19568.4	4.20619e+06	19568.4	4.20619e+06	214.948
qe_Acetyl	Medium	lYTATSR	6	12	N-Term(Acetyl)	1	1	YJR121W	ATP2	0	2	1	427.223	853.439	-2.80762	HCD	29.7348	230.791	40.88	10619	qExPlus02_00982.raw	8.68	33	26	4506961	0.02012	0.1512			0	0	0	0
qe_Acetyl	High	tIAMDGTEGLVR	94	105	N-Term(Acetyl)	1	1	YJR121W	ATP2	0	1	1	1304.65	1304.65	0.102608	HCD	0	250	62.4615	16206	qExPlus02_00982.raw	92.07	36	29	1.31851e+07	0	0.03349			0	0	0	0
qe	High	tIAmDGTEGLVR	94	105	N-Term(Dimethyl); M4(Oxidation)	1	1	YJR121W	ATP2	0	2	1	653.836	1306.67	-1.375	HCD	0	54.8257	30.9788	8398	qExPlus02_00983.raw	43.22	35	28	1.91331e+07	0	0.002886	1.71691e+07	9.83993e+06	1.71691e+07	9.83993e+06
qe	High	tIAmDGTEGLVR	94	105	N-Term(Dimethyl:2H(6)); M4(Oxidation)	1	1	YJR121W	ATP2	0	2	1	656.855	1312.7	-1.69591	HCD	5.63798	250	41.2392	11095	qExPlus02_00983.raw	34.79	34	27	1.01697e+06	0	0.02142	3.06748e+06	965223	2.02366e+07	1.08052e+07
qe	High	tIAMDGTEGLVR	94	105	N-Term(Dimethyl:2H(6))	1	1	YJR121W	ATP2	0	2	1	648.857	1296.71	-1.68447	HCD	19.7915	250	41.2505	11098	qExPlus02_00983.raw	38.56	34	27	2.7393e+06	0	0.00801	3.83548e+06	2.7393e+06	2.4072e+07	1.35445e+07	2.4072e+07	1.35445e+07	0.562664
qe_Acetyl	High	tIAmDGTEGLVR	94	105	N-Term(Acetyl); M4(Oxidation)	1	1	YJR121W	ATP2	0	2	1	660.824	1320.64	-3.77652	HCD	9.96608	99.5353	51.443	13425	qExPlus02_00982.raw	81.1	35	28	3.33533e+07	0	0.02905			0	0
qe_Acetyl	High	tIAMDGTEGLVR	94	105	N-Term(Acetyl)	1	1	YJR121W	ATP2	0	2	1	652.828	1304.65	-2.29362	HCD	0.528801	15.4272	62.5023	16218	qExPlus02_00982.raw	84.96	34	27	253081504	0	0.0002738			0	0	0	0
qe	High	gLTIAEYFR	#N/A	#N/A	N-Term(Dimethyl)	1	1	YJR121W	ATP2	0	2	2	549.303	1097.6	0.513469	HCD	26.4915	250	53.1424	14013	qExPlus02_00983.raw	47.76	34	27	5.91565e+06	0	0.004941	3517294		3517294	0	3517294	0
qe_Acetyl	High	mNSSGDNAGFEWWR	44	57	N-Term(Acetyl)	1	1	YNR020C	ATP23	0	2	1	849.853	1698.7	0.748489	HCD	14.0438	250	75.0461	19273	qExPlus02_00982.raw	100.69	27	20	924913	0	0.006651			0	0	0	0
qe	High	yATLkEVEmR	33	42	N-Term(Dimethyl); K5(Dimethyl); M9(Oxidation)	1	1	YBR039W	ATP3	1	2	1	656.351	1311.7	-1.96942	HCD	0	250	19.9474	4868	qExPlus02_00984.raw	44.75	35	28	3.76705e+06	0.005141	0.08233	3.76705e+06	1.26718e+06	3.76705e+06	1.26718e+06
qe	High	yATLkEVEmR	33	42	N-Term(Dimethyl); K5(Dimethyl); M9(Oxidation)	1	1	YBR039W	ATP3	1	2	1	656.351	1311.69	-2.5278	HCD	0	250	20.2289	4939	qExPlus02_00984.raw	30.84	35	28	1.17911e+07	0.0008655	0.01211	5364996	9102.34	9.13205e+06	1.27628e+06
qe	High	yATLkEVEmR	33	42	N-Term(Dimethyl); K5(Dimethyl); M9(Oxidation)	1	1	YBR039W	ATP3	1	2	1	656.351	1311.7	-1.59717	HCD	51.7645	250	20.8539	5098	qExPlus02_00984.raw	36.92	35	28	2.20314e+06	0.004135	0.03466	1.64602e+06	9102.34	1.07781e+07	1.28539e+06
qe	High	yATLkEVEMR	33	42	N-Term(Dimethyl:2H(6)); K5(Dimethyl:2H(6))	1	1	YBR039W	ATP3	1	2	1	654.393	1307.78	0.573455	HCD	0	250	25.3021	6244	qExPlus02_00984.raw	55.6	34	27	1.50887e+07	0	0.002053	171841576	1.50887e+07	1.8262e+08	1.63741e+07
qe	High	yATLkEVEmR	33	42	N-Term(Dimethyl:2H(6)); K5(Dimethyl:2H(6)); M9(Oxidation)	1	1	YBR039W	ATP3	1	2	1	662.391	1323.77	0.90369	HCD	0	250	25.3228	6249	qExPlus02_00984.raw	26.71	34	27	4.04287e+06	0.001946	0.08749	47287016	4.04287e+06	2.29907e+08	2.0417e+07
qe	High	yATLkEVEMR	33	42	N-Term(Dimethyl); K5(Dimethyl)	1	1	YBR039W	ATP3	1	2	1	648.353	1295.7	-2.71504	HCD	20.2384	173.917	25.5983	6329	qExPlus02_00984.raw	60.1	35	28	1.53721e+06	0	0.006185	920389	9102.34	2.30827e+08	2.04261e+07	2.30827e+08	2.04261e+07	0.0884909
qe	High	aTLkEVEMR	34	42	N-Term(Dimethyl); K4(Dimethyl)	1	1	YBR039W	ATP3	1	1	1	1132.64	1132.64	0.170114	HCD	0	250	19.6664	4797	qExPlus02_00984.raw	52.49	36	29	648148	0	0.003894			0	0	0	0
qe	High	aTLkEVEmR	34	42	N-Term(Dimethyl); K4(Dimethyl); M8(Oxidation)	1	1	YBR039W	ATP3	1	2	1	574.82	1148.63	-2.05911	HCD	18.0107	163.787	14.3069	3446	qExPlus02_00984.raw	50.85	36	29	451622224	0.0008655	0.01426	451622224	3.74874e+08	451622224	3.74874e+08
qe	Medium	aTLkEVEmR	34	42	N-Term(Dimethyl); K4(Dimethyl); M8(Oxidation)	1	1	YBR039W	ATP3	1	2	1	574.82	1148.63	-1.74029	HCD	7.05094	1.63727	14.5649	3525	qExPlus02_00984.raw	43.81	36	29	796235770	0.01151	0.1608	796235770	1.60924e+08	1247857994	5.35798e+08
qe	High	aTLkEVEmR	34	42	N-Term(Dimethyl); K4(Dimethyl); M8(Oxidation)	1	1	YBR039W	ATP3	1	2	1	574.82	1148.63	-1.42146	HCD	1.35016	41.1147	14.8333	3598	qExPlus02_00984.raw	54.72	36	29	1.08e+08	0.005141	0.06095	1.08e+08	7.41811e+07	1.35586e+09	6.09979e+08
qe	High	aTLkEVEmR	34	42	N-Term(Dimethyl); K4(Dimethyl); M8(Oxidation)	1	1	YBR039W	ATP3	1	2	1	574.819	1148.63	-3.7595	HCD	1.65735	39.7293	15.1058	3671	qExPlus02_00984.raw	48.11	36	29	3.19598e+07	0.0008655	0.0244	3.17277e+07	1.27126e+07	1.38759e+09	6.22691e+08
qe	Medium	aTLkEVEmR	34	42	N-Term(Dimethyl:2H(6)); K4(Dimethyl:2H(6)); M8(Oxidation)	1	1	YBR039W	ATP3	1	2	1	580.859	1160.71	1.53407	HCD	0	207.342	15.5862	3787	qExPlus02_00984.raw	41.19	34	27	8.66885e+06	0.04937	0.416	1.90822e+07	8.66885e+06	1.40667e+09	6.3136e+08
qe	High	aTLkEVEmR	34	42	N-Term(Dimethyl:2H(6)); K4(Dimethyl:2H(6)); M8(Oxidation)	1	1	YBR039W	ATP3	1	2	1	580.857	1160.71	-3.19852	HCD	11.091	250	16.2932	3962	qExPlus02_00984.raw	29.73	35	28	3.01248e+06	0	0.05498	5.07189e+06	3.01248e+06	1.41174e+09	6.34373e+08
qe	High	aTLkEVEmR	34	42	N-Term(Dimethyl); K4(Dimethyl); M8(Oxidation)	1	1	YBR039W	ATP3	1	2	1	574.821	1148.63	0.172651	HCD	0	130.551	16.722	4075	qExPlus02_00984.raw	42.41	36	29	6.52705e+06	0.001683	0.03023	6.12832e+06	3.12674e+06	1.41787e+09	6.37499e+08
qe	High	aTLkEVEmR	34	42	N-Term(Dimethyl:2H(6)); K4(Dimethyl:2H(6)); M8(Oxidation)	1	1	YBR039W	ATP3	1	2	1	580.858	1160.71	-0.779641	HCD	0	250	16.9768	4141	qExPlus02_00984.raw	47.68	34	27	7.10031e+06	0	0.0125	9.41823e+06	7.10031e+06	1.42729e+09	6.446e+08
qe	Medium	aTLkEVEmR	34	42	N-Term(Dimethyl); K4(Dimethyl); M8(Oxidation)	1	1	YBR039W	ATP3	1	2	1	574.82	1148.63	-1.10264	HCD	0	250	18.0503	4402	qExPlus02_00984.raw	45.88	36	29	2.36164e+06	0.01252	0.1641	925707	9102.34	1.42821e+09	6.44609e+08
qe	High	aTLkEVEmR	34	42	N-Term(Dimethyl:2H(6)); K4(Dimethyl:2H(6)); M8(Oxidation)	1	1	YBR039W	ATP3	1	2	1	580.858	1160.71	-1.30548	HCD	16.4244	250	19.408	4730	qExPlus02_00984.raw	48.25	34	27	80974.6	0	0.02361			1.42821e+09	6.44609e+08
qe	High	aTLkEVEMR	34	42	N-Term(Dimethyl); K4(Dimethyl)	1	1	YBR039W	ATP3	1	2	1	566.824	1132.64	0.85878	HCD	36.3952	26.3207	19.5804	4772	qExPlus02_00984.raw	37.8	36	29	4.02239e+08	0.0008655	0.01299	4.02239e+08	7.13116e+07	1.83045e+09	7.1592e+08
qe	High	aTLkEVEmR	34	42	N-Term(Dimethyl:2H(6)); K4(Dimethyl:2H(6)); M8(Oxidation)	1	1	YBR039W	ATP3	1	2	1	580.857	1160.71	-1.72616	HCD	16.5315	4.85323	19.6799	4801	qExPlus02_00984.raw	40.86	34	27	1.0428e+08	0	0.01724			1.83045e+09	7.1592e+08
qe	High	aTLkEVEmR	34	42	N-Term(Dimethyl); K4(Dimethyl); M8(Oxidation)	1	1	YBR039W	ATP3	1	2	1	574.821	1148.64	0.916571	HCD	34.2647	250	19.5043	4753	qExPlus02_00984.raw	47.98	36	29	339822388	0.007766	0.1238			1.83045e+09	7.1592e+08
qe	High	aTLkEVEmR	34	42	N-Term(Dimethyl:2H(6)); K4(Dimethyl:2H(6)); M8(Oxidation)	1	1	YBR039W	ATP3	1	2	1	580.857	1160.71	-2.04167	HCD	10.8526	250	20.3459	4969	qExPlus02_00984.raw	32.41	34	27	4.62069e+06	0.005154	0.1675	16466308	4.62069e+06	1.84692e+09	7.20541e+08
qe	Medium	aTLkEVEmR	34	42	N-Term(Dimethyl); K4(Dimethyl); M8(Oxidation)	1	1	YBR039W	ATP3	1	2	1	574.821	1148.63	-0.0398974	HCD	42.8246	250	20.5749	5030	qExPlus02_00984.raw	44.41	36	29	614516	0.03702	0.3528		9102.34	1.84692e+09	7.2055e+08
qe	High	aTLkEVEmR	34	42	N-Term(Dimethyl); K4(Dimethyl); M8(Oxidation)	1	1	YBR039W	ATP3	1	2	1	574.821	1148.63	0.172651	HCD	28.4311	250	20.8586	5099	qExPlus02_00984.raw	31.24	36	29	3.8372e+06	0.005141	0.07196	3.69329e+06	1.55267e+06	1.85061e+09	7.22103e+08	1.85061e+09	7.22103e+08	0.390197
qe_Acetyl	High	smSMGVR	2	8	N-Term(Acetyl); M2(Oxidation)	1	1	YPL078C	ATP4	0	2	1	413.182	825.356	-3.74006	HCD	29.7746	250	33.503	8474	qExPlus02_00982.raw	22.08	30	23	4.09848e+06	0.002723	0.07802			0	0
qe_Acetyl	High	sMSmGVR	2	8	N-Term(Acetyl); M4(Oxidation)	1	1	YPL078C	ATP4	0	2	1	413.182	825.356	-3.88795	HCD	11.1487	41.8759	35.2018	8935	qExPlus02_00982.raw	18.79	30	23	123927232	0.001447	0.06275			0	0
qe_Acetyl	Medium	smSMGVR	2	8	N-Term(Acetyl); M2(Oxidation)	1	1	YPL078C	ATP4	0	2	1	413.183	825.358	-1.81736	HCD	17.8813	250	24.9018	6137	qExPlus02_00982.raw	11.53	30	23	2.3362e+06	0.02487	0.1702			0	0
qe_Acetyl	Medium	sMSmGVR	2	8	N-Term(Acetyl); M4(Oxidation)	1	1	YPL078C	ATP4	0	2	1	413.182	825.356	-4.33165	HCD	15.6647	250	21.0918	5133	qExPlus02_00982.raw	24.55	30	23	4.28188e+06	0.0386	0.2487			0	0
qe_Acetyl	Medium	sMSmGVR	2	8	N-Term(Acetyl); M4(Oxidation)	1	1	YPL078C	ATP4	0	2	1	413.182	825.356	-4.33165	HCD	5.59157	147.236	21.3575	5200	qExPlus02_00982.raw	34.87	31	24	13169802	0.04069	0.3132			0	0
qe_Acetyl	Medium	smSmGVR	2	8	N-Term(Acetyl); M2(Oxidation); M4(Oxidation)	1	1	YPL078C	ATP4	0	2	1	421.18	841.352	-2.99338	HCD	49.2525	250	21.4616	5226	qExPlus02_00982.raw	15.45	29	22	4.49099e+06	0.03047	0.2623			0	0
qe_Acetyl	Medium	smSMGVR	2	8	N-Term(Acetyl); M2(Oxidation)	1	1	YPL078C	ATP4	0	2	1	413.182	825.357	-3.22241	HCD	0	250	22.0264	5368	qExPlus02_00982.raw	28.86	31	24	1.80385e+07	0.02819	0.2447			0	0
qe_Acetyl	Medium	sMSMGVR	2	8	N-Term(Acetyl)	1	1	YPL078C	ATP4	0	2	1	405.185	809.362	-3.23425	HCD	3.50067	9.85787	35.1582	8922	qExPlus02_00982.raw	31.18	31	24	2.6003e+08	0.0386	0.2471			0	0
qe_Acetyl	Medium	sMSmGVR	2	8	N-Term(Acetyl); M4(Oxidation)	1	1	YPL078C	ATP4	0	2	1	413.182	825.358	-2.03921	HCD	10.408	250	34.1097	8646	qExPlus02_00982.raw	27.26	31	24	3.61175e+06	0.02352	0.2222			0	0
qe_Acetyl	Medium	smSmGVR	2	8	N-Term(Acetyl); M2(Oxidation); M4(Oxidation)	1	1	YPL078C	ATP4	0	2	1	421.18	841.352	-2.77575	HCD	25.3403	177.41	34.9352	8862	qExPlus02_00982.raw	19.81	28	21	75853384	0.03398	0.2243			0	0
qe_Acetyl	Medium	smSmGVR	2	8	N-Term(Acetyl); M2(Oxidation); M4(Oxidation)	1	1	YPL078C	ATP4	0	2	1	421.18	841.352	-2.45224	HCD		83.8171	12.9252	3143	qExPlus02_00982.raw	11.12	28	21	6.02696e+06	0.01487	0.1352			0	0	0	0
qe	High	aSkAAAPPPVR	18	28	N-Term(Dimethyl); K3(Dimethyl)	1	1	YDR298C	ATP5	1	2	1	560.842	1120.68	-6.37343	HCD	0	250	11.7239	2826	qExPlus02_00984.raw	46.06	33	26	340129	0	0.00469	203420	9102.34	203420	9102.34	203420	9102.34	0.0447465
qe	High	sPLDQFEIR	11	19	N-Term(Dimethyl)	1	1	Q0085	ATP6	0	1	1	1132.6	1132.6	-2.88186	HCD	0	250	47.4096	12578	qExPlus02_00983.raw	42.31	35	28	1.30043e+08	0.0008655	0.01685			0	0	0	0
qe	Medium	sPLDQFEIR	11	19	N-Term(Dimethyl)	1	1	Q0085	ATP6	0	2	1	566.803	1132.6	-1.65427	HCD	0	250	42.4249	11377	qExPlus02_00983.raw	30.89	35	28	2.02631e+06	0.02523	0.2941	2.02631e+06	782425	2.02631e+06	782425
qe	High	sPLDQFEIR	11	19	N-Term(Dimethyl:2H(6))	1	1	Q0085	ATP6	0	2	1	569.821	1138.64	-1.59393	HCD	5.54951	5.50992	47.5967	12630	qExPlus02_00983.raw	34.14	34	27	5.81156e+08	0.001946	0.07198	1374415113	5.81156e+08	1.37644e+09	5.81938e+08	1.37644e+09	5.81938e+08	0.422785
qe	High	lATGAPLDASkLkITR	17	32	N-Term(Dimethyl:2H(6)); K11(Dimethyl:2H(6)); K13(Dimethyl:2H(6))	1	1	YHR208W	BAT1	2	2	1	879.099	1757.19	-0.774137	HCD		250	35.4666	9002	qExPlus02_00984.raw	67.06	28	21	7.78835e+06	0	8.58e-06			0	0
qe	High	lATGAPLDASkLkITR	17	32	N-Term(Dimethyl); K11(Dimethyl); K13(Dimethyl)	1	1	YHR208W	BAT1	2	2	1	870.043	1739.08	-0.295576	HCD	0	250	35.7275	9073	qExPlus02_00984.raw	94.59	29	22	2.93472e+07	0	3.653e-09			0	0	0	0
qe	High	lATGAPLDASkLkITR	17	32	N-Term(Dimethyl:2H(6)); K11(Dimethyl:2H(6)); K13(Dimethyl:2H(6))	1	1	YHR208W	BAT1	2	3	1	586.402	1757.19	-0.82514	HCD	4.43013	183.441	35.401	8985	qExPlus02_00984.raw	53.66	28	21	92599726	0	0.0001333			0	0
qe	High	lATGAPLDASkLkITR	17	32	N-Term(Dimethyl); K11(Dimethyl); K13(Dimethyl)	1	1	YHR208W	BAT1	2	3	1	580.365	1739.08	0.223136	HCD	4.73414	8.39241	35.6223	9047	qExPlus02_00984.raw	66.64	28	21	2.26655e+08	0	0.0001998			0	0
qe	High	lATGAPLDASkLkITR	17	32	N-Term(Dimethyl); K11(Dimethyl); K13(Dimethyl)	1	1	YHR208W	BAT1	2	3	1	580.366	1739.08	2.32891	HCD	6.99752	154.791	35.9044	9119	qExPlus02_00984.raw	53.2	28	21	2.50154e+07	0	0.001377	22606982	2.43555e+06	22606982	2.43555e+06
qe	High	lATGAPLDASkLkITR	17	32	N-Term(Dimethyl); K11(Dimethyl); K13(Dimethyl)	1	1	YHR208W	BAT1	2	3	1	580.364	1739.08	-0.0927308	HCD	15.0638	250	37.7916	9613	qExPlus02_00984.raw	36.38	28	21	4.54541e+06	0	4.838e-05	2.11792e+06	9102.34	2.47249e+07	2.44466e+06	2.47249e+07	2.44466e+06	0.0988742
qe	High	aTGAPLDASkLkITR	18	32	N-Term(Dimethyl); K10(Dimethyl); K12(Dimethyl)	1	1	YHR208W	BAT1	2	3	1	542.669	1625.99	-1.92711	HCD	24.3426	187.439	29.3487	7285	qExPlus02_00984.raw	31	31	24	1.08207e+07	0	0.005263	8.93632e+06	3.97933e+06	8.93632e+06	3.97933e+06
qe	High	aTGAPLDASkLkITR	18	32	N-Term(Dimethyl); K10(Dimethyl); K12(Dimethyl)	1	1	YHR208W	BAT1	2	3	1	542.669	1625.99	-1.58927	HCD	4.34636	133.337	29.6263	7361	qExPlus02_00984.raw	47.85	31	24	7.77932e+06	0	0.00125	3145530	9102.34	1.20818e+07	3.98843e+06	1.20818e+07	3.98843e+06	0.330118
qe_Acetyl	High	mMSTIYR	1	7	N-Term(Acetyl)	1	1	YGR286C	BIO2	0	1	1	943.436	943.436	-1.90212	HCD	0	250	54.3652	14170	qExPlus02_00982.raw	30.9	31	24	1.17363e+07	0.005022	0.08108			0	0	0	0
qe_Acetyl	High	mMSTIYR	1	7	N-Term(Acetyl)	1	1	YGR286C	BIO2	0	2	1	472.222	943.436	-1.91638	HCD	0	74.3634	54.5515	14215	qExPlus02_00982.raw	57.7	31	24	9.09201e+07	0.00508	0.09812			0	0
qe_Acetyl	High	mMSTIYR	1	7	N-Term(Acetyl); M1(Oxidation)	1	1	YGR286C	BIO2	0	2	1	480.219	959.43	-2.24623	HCD	31.4334	33.9282	40.7452	10581	qExPlus02_00982.raw	36.81	30	23	64265057	0.00508	0.09432			0	0
qe_Acetyl	Medium	mMSTIYR	1	7	N-Term(Acetyl); M1(Oxidation)	1	1	YGR286C	BIO2	0	2	1	480.219	959.43	-2.81878	HCD	12.8345	30.5215	40.4848	10498	qExPlus02_00982.raw	41.08	30	23	56137566	0.02487	0.1662			0	0
qe_Acetyl	Medium	mmSTIYR	1	7	N-Term(Acetyl); M1(Oxidation); M2(Oxidation)	1	1	YGR286C	BIO2	0	2	1	488.216	975.424	-3.25357	HCD	0	183.016	27.6783	6887	qExPlus02_00982.raw	42.42	31	24	2.30621e+07	0.02352	0.224			0	0
qe_Acetyl	Medium	mmSTIYR	1	7	N-Term(Acetyl); M1(Oxidation); M2(Oxidation)	1	1	YGR286C	BIO2	0	2	1	488.216	975.426	-1.87697	HCD	20.5529	250	54.4924	14200	qExPlus02_00982.raw	26.73	31	24	3.01151e+06	0.01487	0.1337			0	0
qe_Acetyl	Medium	mMSTIYR	1	7	N-Term(Acetyl); M1(Oxidation)	1	1	YGR286C	BIO2	0	2	1	480.219	959.43	-2.5007	HCD	18.9221	186.658	54.3353	14163	qExPlus02_00982.raw	40.45	30	23	2.00646e+07	0.02487	0.1728			0	0	0	0
qe	High	tVVIScEPIIR	37	47	N-Term(Dimethyl); C6(Carbamidomethyl)	1	1	YNL305C	BXI1	0	2	1	657.875	1314.74	-1.06937	HCD	0	250	45.5472	12126	qExPlus02_00983.raw	45.68	36	29	1.29782e+06	0	0.004875	786422	9102.34	786422	9102.34	786422	9102.34	0.0115744
qe_Acetyl	High	tLSNLkDLPITSR	8	20	N-Term(Acetyl); K6(Dimethyl:2H(6))	1	1	YML042W	CAT2	1	2	1	767.458	1533.91	-1.32278	HCD	0	250	56.3162	14777	qExPlus02_00983.raw	68.19	33	26	3.49396e+06	0	0.001178	19568.4	1.96759e+06	19568.4	1.96759e+06	19568.4	1.96759e+06	100.549
Fusion	High	tLSNLkDLPITSR	8	20	N-Term(Dimethyl:2H(6)); K6(Dimethyl:2H(6))	1	1	YML042W	CAT2	1	3	1	509.329	1525.97	0.870986	ETD	24.6992	50	3.12389	1809	Fusion002161.raw	19.45	23	16	6.79607e+06	0	0.3112	3532.53	3.80916e+06	3532.53	3.80916e+06	3532.53	3.80916e+06	1078.31
qe	High	sNLkDLPITSR	10	20	N-Term(Dimethyl:2H(6)); K4(Dimethyl:2H(6))	1	1	YML042W	CAT2	1	2	1	656.42	1311.83	-3.88669	HCD	14.1158	250	27.9951	6938	qExPlus02_00984.raw	53.02	34	27	3.33706e+07	0	3.501e-05	9102.34	16692202	9102.34	16692202	9102.34	16692202	1833.84
qe	High	mERPLWVR	24	31	N-Term(Dimethyl:2H(6))	1	1	YGR174C	CBP4	0	2	1	560.832	1120.66	-0.429018	HCD	0	126.718	28.6899	7109	qExPlus02_00984.raw	19.86	35	28	2.60997e+07	0	0.03583	1.16179e+07	2.60997e+07	1.16179e+07	2.60997e+07	1.16179e+07	2.60997e+07	2.24651
qe	High	aAATFAYSQSQkR	31	43	N-Term(Dimethyl:2H(6)); K12(Dimethyl:2H(6))	1	1	YKR066C	CCP1	1	2	1	748.933	1496.86	-1.65581	HCD	0	250	16.6702	4060	qExPlus02_00984.raw	43.55	35	28	404672	0	0.01031	2.63513e+06		2.63513e+06	0	2.63513e+06	0
qe	High	aALASTTPLVHVASVEkGR	63	81	N-Term(Dimethyl:2H(6)); K17(Dimethyl:2H(6))	1	1	YKR066C	CCP1	1	3	1	659.074	1975.21	-0.820195	HCD	15.6767	250	32.3616	8092	qExPlus02_00984.raw	73.74	34	27	2.49586e+07	0	3.101e-07	3.54857e+06	24362057	3.54857e+06	24362057
qe	High	aALASTTPLVHVASVEkGR	63	81	N-Term(Dimethyl:2H(6)); K17(Dimethyl:2H(6))	1	1	YKR066C	CCP1	1	3	1	659.074	1975.21	-1.0056	HCD	27.3212	250	32.6298	8159	qExPlus02_00984.raw	42.66	34	27	4.633e+06	0	8.395e-05	6.92571e+06	4.633e+06	1.04743e+07	2.89951e+07
qe	High	aALASTTPLVHVASVEkGR	63	81	N-Term(Dimethyl:2H(6)); K17(Dimethyl:2H(6))	1	1	YKR066C	CCP1	1	3	1	659.073	1975.21	-1.65451	HCD	22.6836	45.0121	32.8835	8241	qExPlus02_00984.raw	62.04	34	27	2.27512e+07	0	2.523e-08	1.49433e+07	2.12873e+07	2.54176e+07	5.02824e+07	2.54176e+07	5.02824e+07	1.97825
qe	High	tTPLVHVASVEkGR	68	81	N-Term(Dimethyl:2H(6)); K12(Dimethyl:2H(6))	1	1	YKR066C	CCP1	1	3	1	521.331	1561.98	-2.47239	HCD	9.18941	250	40.1618	10221	qExPlus02_00984.raw	44.75	34	27	3406782	0	1.47e-05	9102.34	1.27976e+06	9102.34	1.27976e+06
qe	High	tTPLVHVASVEkGR	68	81	N-Term(Dimethyl); K12(Dimethyl)	1	1	YKR066C	CCP1	1	3	1	517.307	1549.91	0.504204	HCD	23.2812	250	40.3389	10265	qExPlus02_00984.raw	24.05	33	26	254922	0	0.002105	203048		212150	1.27976e+06	212150	1.27976e+06	6.03235
qe_Acetyl	High	sIVYNkTPL	2	10	N-Term(Acetyl); K6(Dimethyl:2H(6))	1	1	YCL064C	CHA1	1	2	1	555.836	1110.66	-3.22977	HCD		77.2922	56.0431	14587	qExPlus02_00982.raw	23.1	33	26	8.90226e+06	0.002723	0.06753		5867020	0	5867020	0	5867020
qe_Acetyl	High	sIVYNkTPLLR	2	12	N-Term(Acetyl); K6(Dimethyl)	1	1	YCL064C	CHA1	1	1	1	1373.81	1373.81	-1.81263	HCD	0	250	48.5801	12875	qExPlus02_00983.raw	46.99	33	26	1.17462e+07	0	0.04792	1.07166e+07	26435958	1.07166e+07	26435958	1.07166e+07	26435958	2.46682
qe	High	sIVYNkTPLLR	2	12	N-Term(Dimethyl:2H(6)); K6(Dimethyl:2H(6))	1	1	YCL064C	CHA1	1	2	1	686.458	1371.91	-2.48329	HCD	16.0628	250	31.1395	7770	qExPlus02_00984.raw	39.01	31	24	3.40613e+06	0	0.002865	9102.34	1.77915e+06	9102.34	1.77915e+06
qe	High	sIVYNkTPLLR	2	12	N-Term(Dimethyl:2H(6)); K6(Dimethyl:2H(6))	1	1	YCL064C	CHA1	1	2	1	686.459	1371.91	0.275034	HCD	22.7108	250	31.8336	7960	qExPlus02_00984.raw	52.06	32	25	1.05225e+08	0	0.00153		50303352	9102.34	5.20825e+07
qe	High	sIVYNkTPLLR	2	12	N-Term(Dimethyl); K6(Dimethyl)	1	1	YCL064C	CHA1	1	2	1	680.421	1359.84	-0.257739	HCD	7.85997	250	32.0799	8022	qExPlus02_00984.raw	60.39	33	26	4839993	0	0.0003453	4839993	64885032	4.8491e+06	1.16968e+08
qe	High	sIVYNkTPLLR	2	12	N-Term(Dimethyl:2H(6)); K6(Dimethyl:2H(6))	1	1	YCL064C	CHA1	1	2	1	686.458	1371.91	-2.39431	HCD	0	250	32.382	8097	qExPlus02_00984.raw	34.84	31	24	4.97259e+06	0	0.004372	9102.34	2520224	4.8582e+06	1.19488e+08	4.8582e+06	1.19488e+08	24.5951
qe_Acetyl	High	sIVYNkTPLLR	2	12	N-Term(Acetyl); K6(Dimethyl:2H(6))	1	1	YCL064C	CHA1	1	2	1	690.429	1379.85	-1.72765	HCD	3.95033	0.552734	48.6481	12892	qExPlus02_00983.raw	42.17	32	25	7150888769	0	0.003035	2932047728	7134945840	2932047728	7134945840
qe_Acetyl	High	sIVYNkTPLLR	2	12	N-Term(Acetyl); K6(Dimethyl)	1	1	YCL064C	CHA1	1	2	1	687.409	1373.81	-2.93311	HCD	8.75661	250	50.1883	13271	qExPlus02_00983.raw	47.74	33	26	6.4254e+06	0.005022	0.07196	4762082	19568.4	2936809810	7.13497e+09
qe_Acetyl	High	sIVYNkTPLLR	2	12	N-Term(Acetyl); K6(Dimethyl:2H(6))	1	1	YCL064C	CHA1	1	2	1	690.428	1379.85	-2.43538	HCD	17.9266	250	51.5824	13613	qExPlus02_00983.raw	38.43	31	24	1.97663e+06	0.001447	0.0305	387000	1.97663e+06	2.9372e+09	7.13694e+09	2.9372e+09	7.13694e+09	2.42985
qe	High	sPQVFASSGGNAGFAAATAcQR	59	80	N-Term(Dimethyl:2H(6)); C20(Carbamidomethyl)	1	1	YCL064C	CHA1	0	3	1	730.358	2189.06	-3.37754	HCD	8.55603	250	41.0757	11057	qExPlus02_00983.raw	92.18	31	24	3.12998e+06	0	0.0003489	524557	2.91399e+06	524557	2.91399e+06	524557	2.91399e+06	5.55514
qe	High	aSSGGNAGFAAATAcQR	64	80	N-Term(Dimethyl); C15(Carbamidomethyl)	1	1	YCL064C	CHA1	0	2	1	812.877	1624.75	-2.37141	HCD	0	250	21.5732	5352	qExPlus02_00983.raw	125.52	32	25	3.32494e+06	0	1.746e-10	3.32494e+06	2.41174e+06	3.32494e+06	2.41174e+06	3.32494e+06	2.41174e+06	0.725349
qe	High	sSGGNAGFAAATAcQR	65	80	N-Term(Dimethyl:2H(6)); C14(Carbamidomethyl)	1	1	YCL064C	CHA1	0	2	1	780.377	1559.75	-2.11672	HCD	0	250	21.1542	5243	qExPlus02_00983.raw	128.13	30	23	4.21769e+06	0	1.285e-05	1.87599e+06	4.21769e+06	1.87599e+06	4.21769e+06	1.87599e+06	4.21769e+06	2.24825
Fusion_Acetyl	High	gIGNLIMkSAIR	81	96	N-Term(Acetyl); K8(Dimethyl:2H(6))	1	1	YCL064C	CHA1	1	3	1	450.279	1348.82	-1.22914	ETD	35.6906	50	7.2466	4199	Fusion002161.raw	52.44	33	26	4.34716e+06	0	0.0008154	1.36504e+06	4.34716e+06	1.36504e+06	4.34716e+06	1.36504e+06	4.34716e+06	3.18464
Fusion_Acetyl	High	lSLPcTVVVPTATkkR	81	96	N-Term(Acetyl); C5(Carbamidomethyl); K14(Dimethyl:2H(6)); K15(Dimethyl:2H(6))	1	1	YCL064C	CHA1	2	3	1	627.398	1880.18	0.694077	HCD	32.3369	39.1029	16.4494	9406	Fusion002161.raw	25.36	29	22	1.13272e+07	0	0.1345	2343584	8.85017e+06	2343584	8.85017e+06	2343584	8.85017e+06	3.77634
qe	High	mIkFTNENLIR	1	11	N-Term(Dimethyl:2H(6)); M1(Oxidation); K3(Dimethyl:2H(6))	1	1	YOR356W	CIR2	1	2	1	731.944	1462.88	-1.926	HCD	0	250	36.9214	9397	qExPlus02_00984.raw	22.44	35	28	1.73677e+06	0	0.01556	9102.34	1.11551e+06	9102.34	1.11551e+06	9102.34	1.11551e+06	122.552
qe_Acetyl	High	mIkFTNENLIR	1	11	N-Term(Acetyl); M1(Oxidation); K3(Dimethyl:2H(6))	1	1	YOR356W	CIR2	1	2	1	735.916	1470.82	-0.888128	HCD	0	250	47.5418	12616	qExPlus02_00983.raw	48.46	35	28	63462337	0.001447	0.01798	19568.4	29159492	19568.4	29159492
qe_Acetyl	High	mIkFTNENLIR	1	11	N-Term(Acetyl); K3(Dimethyl:2H(6))	1	1	YOR356W	CIR2	1	2	1	727.918	1454.83	-1.70812	HCD	18.1695	169.817	56.42	14803	qExPlus02_00983.raw	42.65	34	27	8.25473e+07	0	0.0005804	19568.4	35946216	39136.7	65105708
qe_Acetyl	High	mIkFTNENLIR	1	11	N-Term(Acetyl); M1(Oxidation); K3(Dimethyl:2H(6))	1	1	YOR356W	CIR2	1	2	1	735.916	1470.83	-0.0581837	HCD	39.2611	250	56.182	14746	qExPlus02_00983.raw	24.45	35	28	22714515	0.001447	0.01932	19568.4	9642013	58705.1	74747721	58705.1	74747721	1273.28
Fusion	High	mIkFTNENLIR	1	11	N-Term(Dimethyl:2H(6)); K3(Dimethyl:2H(6))	1	1	YOR356W	CIR2	1	3	1	482.968	1446.89	-0.00823097	HCD	26.5241	32.578	1.68538	965	Fusion002161.raw	34.01	23	16	7.50401e+07	0	0.07908	3532.53	35690852	3532.53	35690852	3532.53	35690852	10103.5
Fusion_Acetyl	High	mIkFTNENLIRGIR	1	14	N-Term(Acetyl); K3(Dimethyl:2H(6))	1	1	YOR356W	CIR2	2	3	1	594.351	1781.04	1.07943	ETD	15.9386	50	21.5495	12206	Fusion002161.raw	39.9	34	27	6.6228e+06	0	0.0584	2297.14	2756900	2297.14	2756900	2297.14	2756900	1200.15
qe	High	ikFTNENLIR	2	11	N-Term(Dimethyl:2H(6)); K2(Dimethyl:2H(6))	1	1	YOR356W	CIR2	1	2	1	658.428	1315.85	-0.379223	HCD	61.9631	250	31.855	7965	qExPlus02_00984.raw	16.37	33	26	2.45368e+06	0	0.04837	9102.34	1.4488e+06	9102.34	1.4488e+06	9102.34	1.4488e+06	159.168
qe_Acetyl	High	sAILSTTSkSFL	2	13	N-Term(Acetyl); K9(Dimethyl:2H(6))	1	1	YNR001C	CIT1	1	2	1	665.89	1330.77	-1.12689	HCD	18.1974	250	74.194	19066	qExPlus02_00982.raw	38.38	35	28	1.45187e+06	0.001447	0.04535	19568.4	863207	19568.4	863207	19568.4	863207	44.1124
qe	High	sAILSTTSkSFLSR	2	15	N-Term(Dimethyl:2H(6)); K9(Dimethyl:2H(6))	1	1	YNR001C	CIT1	1	2	1	783.486	1565.96	-0.806202	HCD	8.06188	250	35.6851	9062	qExPlus02_00984.raw	77.82	34	27	1.71613e+07	0	1.935e-05	9102.34	8559676	9102.34	8559676	9102.34	8559676	940.382
qe_Acetyl	High	sAILSTTSkSFLSR	2	15	N-Term(Acetyl); K9(Dimethyl:2H(6))	1	1	YNR001C	CIT1	1	2	1	787.457	1573.91	-0.07463	HCD	48.5063	250	54.0735	14232	qExPlus02_00983.raw	29.51	34	27	1.29653e+06	0.001447	0.05472	19568.4	544495	19568.4	544495
qe_Acetyl	High	sAILSTTSkSFLSR	2	15	N-Term(Acetyl); K9(Dimethyl:2H(6))	1	1	YNR001C	CIT1	1	2	1	787.456	1573.9	-1.31557	HCD	4.17396	1.6585	57.4575	15050	qExPlus02_00983.raw	75.71	34	27	2.89754e+09	0	4.698e-05		1216840192	19568.4	1.21738e+09
qe_Acetyl	High	sAILSTTSkSFLSR	2	15	N-Term(Acetyl); K9(Dimethyl:2H(6))	1	1	YNR001C	CIT1	1	2	1	787.457	1573.91	-0.152189	HCD	44.7915	250	58.4381	15293	qExPlus02_00983.raw	43.62	34	27	4.10147e+06	0	0.003982	19568.4	1.85279e+06	39136.7	1219237478	39136.7	1219237478	31153.3
Fusion_Acetyl	High	sAILSTTSkSFLSR	2	19	N-Term(Acetyl); K9(Dimethyl:2H(6))	1	1	YNR001C	CIT1	1	2	1	787.458	1573.91	1.47655	HCD	4.54791	34.4829	23.656	13352	Fusion002161.raw	24.49	34	27	6.934e+06	0	0.1892	2297.14	2.59365e+06	2297.14	2.59365e+06	2297.14	2.59365e+06	1129.08
Fusion_Acetyl	High	gIkGLVWEGSVLDPEEGIR	86	104	N-Term(Acetyl); K3(Dimethyl:2H(6))	1	1	YNR001C	CIT1	1	3	1	710.735	2130.19	9.6993	HCD	49.3208	250	44.7857	22846	Fusion002161.raw	29.6	35	28	110588	0	0.08419	173233		173233	0	173233	0
Fusion_Acetyl	High	sAILSTTSkSFLSRGSTR	2	19	N-Term(Acetyl); K9(Dimethyl:2H(6))	1	1	YNR001C	CIT1	2	3	1	659.042	1975.11	0.700756	ETD	13.8218	50	12.8332	7386	Fusion002161.raw	36.19	34	27	6.75758e+07	0	0.03632	2297.14	26471878	2297.14	26471878	2297.14	26471878	11523.9
qe	High	aILSTTSkSFLSR	3	15	N-Term(Dimethyl:2H(6)); K8(Dimethyl:2H(6))	1	1	YNR001C	CIT1	1	2	1	739.971	1478.94	1.40597	HCD	26.1069	154.431	33.5787	8492	qExPlus02_00984.raw	41.48	34	27	6.72154e+06	0	0.001181	9102.34	3.74113e+06	9102.34	3.74113e+06	9102.34	3.74113e+06	411.007
qe	High	sTTSkSFLSR	6	15	N-Term(Dimethyl:2H(6)); K5(Dimethyl:2H(6))	1	1	YNR001C	CIT1	1	2	1	591.367	1181.73	-0.477936	HCD	48.7776	250	15.292	3716	qExPlus02_00984.raw	26.53	34	27	9.53576e+06	0	0.02862	9102.34	5.56259e+06	9102.34	5.56259e+06	9102.34	5.56259e+06	611.116
qe	High	fALLNAR	29	35	N-Term(Dimethyl:2H(6))	1	1	YNR001C	CIT1	0	2	1	419.773	838.539	-2.98109	HCD	42.3002	106.455	38.9873	10557	qExPlus02_00983.raw	25.42	31	24	1.28325e+07	0.001946	0.08552	9102.34	8499691	9102.34	8499691	9102.34	8499691	933.792
qe	Medium	aLLNAR	30	35	N-Term(Dimethyl:2H(6))	1	1	YNR001C	CIT1	0	2	1	346.24	691.473	-0.800011	HCD	20.3329	250	16.7682	4113	qExPlus02_00983.raw	18.3	37	30	1.09365e+07	0.03079	0.3245	9102.34	8446392	9102.34	8446392	9102.34	8446392	927.936
qe	High	ySSASEQTLkER	37	48	N-Term(Dimethyl:2H(6)); K10(Dimethyl:2H(6))	1	1	YNR001C	CIT1	1	2	1	733.912	1466.82	-4.9729	HCD	0	250	13.1363	3166	qExPlus02_00984.raw	41.5	35	28	5.12618e+07	0	0.001956	2.82558e+07	5.09156e+07	2.82558e+07	5.09156e+07
qe	High	ySSASEQTLkER	37	48	N-Term(Dimethyl); K10(Dimethyl)	1	1	YNR001C	CIT1	1	2	1	727.875	1454.74	-4.08798	HCD	0	250	13.5003	3253	qExPlus02_00984.raw	30.43	36	29	178812	0.0008655	0.01099	80715.9		2.83365e+07	5.09156e+07	2.83365e+07	5.09156e+07	1.79682
qe	High	ySSASEQTLkER	37	48	N-Term(Dimethyl:2H(6)); K10(Dimethyl:2H(6))	1	1	YNR001C	CIT1	1	3	1	489.611	1466.82	-4.14986	HCD	0	250	13.1985	3180	qExPlus02_00984.raw	38.48	35	28	3.54364e+06	0	0.0004264	1.42902e+06	3.54364e+06	1.42902e+06	3.54364e+06	1.42902e+06	3.54364e+06	2.47978
qe	High	sSASEQTLkER	38	48	N-Term(Dimethyl); K9(Dimethyl)	1	1	YNR001C	CIT1	1	2	1	646.344	1291.68	-3.39563	HCD	0	250	8.92264	2153	qExPlus02_00983.raw	61.59	36	29	6.99231e+06	0	0.0008355	6.99231e+06	4.86393e+06	6.99231e+06	4.86393e+06
qe	High	sSASEQTLkER	38	48	N-Term(Dimethyl:2H(6)); K9(Dimethyl:2H(6))	1	1	YNR001C	CIT1	1	2	1	652.385	1303.76	1.68826	HCD	21.1313	250	25.8052	6598	qExPlus02_00983.raw	56.45	35	28	1.04293e+06	0	0.0001306	28675268		3.56676e+07	4.86393e+06
qe	High	sSASEQTLkER	38	48	N-Term(Dimethyl:2H(6)); K9(Dimethyl:2H(6))	1	1	YNR001C	CIT1	1	2	1	652.381	1303.76	-3.83587	HCD	0	250	9.11149	2185	qExPlus02_00984.raw	32.46	36	29	7.37541e+07	0	0.011	151913715	7.37541e+07	1.87581e+08	7.8618e+07
qe	High	sSASEQTLkER	38	48	N-Term(Dimethyl); K9(Dimethyl)	1	1	YNR001C	CIT1	1	2	1	646.343	1291.68	-4.52969	HCD	0	250	9.63985	2309	qExPlus02_00984.raw	38.18	36	29	362883	0	0.01037	170499	9102.34	1.87752e+08	7.86271e+07
qe	High	sSASEQTLkER	38	48	N-Term(Dimethyl); K9(Dimethyl)	1	1	YNR001C	CIT1	1	2	1	646.345	1291.68	-2.35608	HCD	0	250	9.94398	2380	qExPlus02_00984.raw	34.79	36	29	349007	0.007065	0.1042	288074	9102.34	1.8804e+08	7.86362e+07	1.8804e+08	7.86362e+07	0.418189
qe	High	sSASEQTLkER	38	48	N-Term(Dimethyl); K9(Dimethyl)	1	1	YNR001C	CIT1	1	3	1	431.232	1291.68	-3.57143	HCD	22.024	169.26	9.20672	2207	qExPlus02_00984.raw	28.32	36	29	2.71505e+07	0	0.001202	2.64803e+07	1.30743e+07	2.64803e+07	1.30743e+07	2.64803e+07	1.30743e+07	0.493738
qe	High	tVIGEVLLEQAYGGmR	70	85	N-Term(Dimethyl); M15(Oxidation)	1	1	YNR001C	CIT1	0	2	1	890.47	1779.93	1.1711	HCD	0	250	63.173	16425	qExPlus02_00983.raw	36.71	36	29	699081	0	0.01006		264968	0	264968
qe	High	tVIGEVLLEQAYGGMR	70	85	N-Term(Dimethyl:2H(6))	1	1	YNR001C	CIT1	0	2	1	885.489	1769.97	-1.38619	HCD	15.338	250	68.4038	17724	qExPlus02_00983.raw	65.82	35	28	1.51349e+06	0	3.707e-05	3.69045e+06	1.51349e+06	3.69045e+06	1.77846e+06	3.69045e+06	1.77846e+06	0.481907
qe	High	iGEVLLEQAYGGMR	72	85	N-Term(Dimethyl)	1	1	YNR001C	CIT1	0	2	1	782.413	1563.82	-0.199232	HCD	20.2289	250	53.8869	14189	qExPlus02_00983.raw	54.44	36	29	1.4936e+06	0	0.00182	737616	9102.34	737616	9102.34	737616	9102.34	0.0123402
qe	High	sVLDPEEGIR	95	104	N-Term(Dimethyl:2H(6))	1	1	YNR001C	CIT1	0	2	1	574.822	1148.64	-4.5436	HCD	14.6921	250	36.266	9894	qExPlus02_00983.raw	37.83	33	26	1.19436e+07	0	0.022	1.4339e+07	1.19436e+07	1.4339e+07	1.19436e+07	1.4339e+07	1.19436e+07	0.832946
qe	High	tVPYLNSNR	2	10	N-Term(Dimethyl:2H(6))	1	1	YCR005C	CIT2	0	1	1	1097.62	1097.62	-1.31136	HCD	0	92.1474	30.9574	8390	qExPlus02_00983.raw	34.24	34	27	107325623	0	0.0148	11720557	100167320	11720557	100167320	11720557	100167320	8.54629
qe	High	tVPYLNSNR	2	10	N-Term(Dimethyl)	1	1	YCR005C	CIT2	0	2	1	546.295	1091.58	-1.88796	HCD	0	136.856	30.7447	8312	qExPlus02_00983.raw	22.02	36	29	2.43843e+08	0.007065	0.1145	2.43843e+08	1196082458	2.43843e+08	1196082458
qe	Medium	tVPYLNSNR	2	10	N-Term(Dimethyl)	1	1	YCR005C	CIT2	0	2	1	546.297	1091.59	1.24324	HCD	59.545	55.951	31.3022	8516	qExPlus02_00983.raw	3.97	36	29	1431973	0.02167	0.2833			2.43843e+08	1196082458
qe	High	tVPYLNSNR	2	10	N-Term(Dimethyl:2H(6))	1	1	YCR005C	CIT2	0	2	1	549.315	1097.62	-0.0446593	HCD	17.86	134.139	31.4008	8549	qExPlus02_00983.raw	23.13	33	26	6.69097e+06	0	0.02617		4.08467e+06	2.43843e+08	1.20017e+09	2.43843e+08	1.20017e+09	4.92188
qe_Acetyl	High	mFkSTLNSIIR	1	11	N-Term(Acetyl); M1(Oxidation); K3(Dimethyl)	1	1	YGR110W	CLD1	1	2	1	698.386	1395.76	-1.7799	HCD	7.30622	250	50.9981	13466	qExPlus02_00983.raw	40.59	35	28	4.32858e+06	0.005022	0.08128			0	0
qe_Acetyl	High	mFkSTLNSIIR	1	11	N-Term(Acetyl); K3(Dimethyl:2H(6))	1	1	YGR110W	CLD1	1	2	1	693.408	1385.81	-0.39875	HCD	41.7442	250	60.1683	15705	qExPlus02_00983.raw	27.83	33	26	3.06557e+07	0.001447	0.03597	2.25099e+07	3.06557e+07	2.25099e+07	3.06557e+07
qe_Acetyl	High	mFkSTLNSIIR	1	11	N-Term(Acetyl); M1(Oxidation); K3(Dimethyl:2H(6))	1	1	YGR110W	CLD1	1	2	1	701.404	1401.8	-1.9045	HCD	19.9768	250	59.912	15646	qExPlus02_00983.raw	26.87	34	27	9.75372e+06	0	0.01055	7.18651e+06	9.75372e+06	2.96964e+07	4.04095e+07	2.96964e+07	4.04095e+07	1.36075
qe	High	mHPQLEAER	1	9	N-Term(Dimethyl); M1(Oxidation)	1	1	YBL059C-A	CMC2	0	2	1	577.785	1154.56	0.770301	HCD	77.9513	250	14.97	3635	qExPlus02_00984.raw	27.73	34	27	1.15022e+06	0.008862	0.1314	1.15022e+06	491879	1.15022e+06	491879
qe	Medium	mHPQLEAER	1	9	N-Term(Dimethyl)	1	1	YBL059C-A	CMC2	0	2	1	569.79	1138.57	4.03439	HCD	31.1252	250	14.9747	3636	qExPlus02_00984.raw	13.8	34	27	6.53437e+06	0.01714	0.2454	6.53437e+06	2.61144e+06	7.68459e+06	3.10332e+06	7.68459e+06	3.10332e+06	0.403836
qe	High	vLNPSkYQDTR	2	12	N-Term(Dimethyl:2H(6)); K6(Dimethyl:2H(6))	1	1	YJL062W-A	COA3	1	2	1	694.921	1388.84	5.0813	HCD	11.4316	250	16.4716	4008	qExPlus02_00984.raw	43.36	34	27	1.05801e+06	0	0.001263			0	0
qe	High	vLNPSkYQDTR	2	12	N-Term(Dimethyl); K6(Dimethyl)	1	1	YJL062W-A	COA3	1	2	1	688.88	1376.75	-0.013367	HCD	6.81666	250	16.5658	4032	qExPlus02_00984.raw	32.74	36	29	3.87863e+08	0	9.699e-05	3.87502e+08	1.32254e+08	3.87502e+08	1.32254e+08
qe	High	vLNPSkYQDTR	2	12	N-Term(Dimethyl:2H(6)); K6(Dimethyl:2H(6))	1	1	YJL062W-A	COA3	1	2	1	694.917	1388.83	-1.07131	HCD	13.6703	13.448	16.7424	4080	qExPlus02_00984.raw	54.75	35	28	3.89217e+08	0	0.0003207			3.87502e+08	1.32254e+08
qe	High	vLNPSkYQDTR	2	12	N-Term(Dimethyl:2H(6)); K6(Dimethyl:2H(6))	1	1	YJL062W-A	COA3	1	2	1	694.917	1388.83	-1.51078	HCD	12.1202	41.5036	17.0002	4148	qExPlus02_00984.raw	30.41	35	28	1.39029e+07	0	0.02013	6.5345e+06	1.39029e+07	3.94036e+08	1.46157e+08
qe	High	vLNPSkYQDTR	2	12	N-Term(Dimethyl); K6(Dimethyl)	1	1	YJL062W-A	COA3	1	2	1	688.881	1376.76	1.75994	HCD	0	250	17.3946	4244	qExPlus02_00984.raw	29.86	37	30	631412	0.008407	0.1295		886046	3.94036e+08	1.47043e+08
qe	Medium	vLNPSkYQDTR	2	12	N-Term(Dimethyl); K6(Dimethyl)	1	1	YJL062W-A	COA3	1	2	1	688.881	1376.75	1.13928	HCD	9.02004	250	17.6542	4306	qExPlus02_00984.raw	23.88	37	30	478690	0.01934	0.2695	478690	580660	3.94515e+08	1.47623e+08	3.94515e+08	1.47623e+08	0.37419
qe	High	vLNPSkYQDTR	2	12	N-Term(Dimethyl); K6(Dimethyl)	1	1	YJL062W-A	COA3	1	3	1	459.589	1376.75	-1.59694	HCD	0	250	16.5932	4040	qExPlus02_00984.raw	14.96	36	29	7.4948e+07	0.005141	0.04889	61081396	33532668	61081396	33532668
qe	Medium	vLNPSkYQDTR	2	12	N-Term(Dimethyl); K6(Dimethyl)	1	1	YJL062W-A	COA3	1	3	1	459.589	1376.75	-0.000967459	HCD	0	142.211	16.8565	4111	qExPlus02_00984.raw	17.48	36	29	3.44955e+06	0.01216	0.1624	2756209	1.34444e+06	63837605	3.48771e+07	63837605	3.48771e+07	0.546341
qe	High	vLIIRPSQTLILFR	2	15	N-Term(Dimethyl:2H(6))	1	1	YOL008W	COQ10	0	2	1	852.062	1703.12	-2.5921	HCD	0	250	62.0051	15520	qExPlus02_00984.raw	22.53	31	24	524270	0.002744	0.11	9102.34	302980	9102.34	302980	9102.34	302980	33.286
Fusion	High	vLIIRPSQTLILFR	2	15	N-Term(Dimethyl:2H(6))	1	1	YOL008W	COQ10	0	3	1	568.379	1703.12	0.94789	HCD	11.6087	72.247	31.7653	17418	Fusion002161.raw	12.74	21	14	1.76449e+07	0	0.164	3532.53	6571291	3532.53	6571291	3532.53	6571291	1860.22
qe	High	fFGLSGTNHTIR	31	42	N-Term(Dimethyl)	1	1	YOL008W	COQ10	0	2	1	689.367	1377.73	-0.189602	HCD	13.9119	250	31.1003	7757	qExPlus02_00984.raw	37.68	36	29	5.44405e+06	0	0.003137	2.58182e+06	9102.34	2.58182e+06	9102.34	2.58182e+06	9102.34	0.00352555
qe	High	tSSSSSSSSPSSkESAPVFTSkELEVAR	35	62	N-Term(Dimethyl:2H(6)); K13(Dimethyl:2H(6)); K22(Dimethyl:2H(6))	1	1	YNR041C	COQ2	2	3	1	987.869	2961.59	-0.425555	HCD	0	250	29.8183	7409	qExPlus02_00984.raw	69.93	35	28	1.64767e+08	0	3.724e-13	138145174	1.64767e+08	138145174	1.64767e+08
qe	High	tSSSSSSSSPSSkESAPVFTSkELEVAR	35	62	N-Term(Dimethyl:2H(6)); K13(Dimethyl:2H(6)); K22(Dimethyl:2H(6))	1	1	YNR041C	COQ2	2	3	1	987.869	2961.59	0.0690588	HCD	0	250	30.0881	7485	qExPlus02_00984.raw	44.69	35	28	63899.8	0	2.183e-05			138145174	1.64767e+08	138145174	1.64767e+08	1.19271
qe	High	tSSSSSSSSPSSkESAPVFTSkELEVAR	35	62	N-Term(Dimethyl:2H(6)); K13(Dimethyl:2H(6)); K22(Dimethyl:2H(6))	1	1	YNR041C	COQ2	2	4	1	741.152	2961.59	-1.43993	HCD	26.9749	220.841	29.9109	7438	qExPlus02_00984.raw	28.03	35	28	14193456	0	0.0001486	1.40397e+07	1.37992e+07	1.40397e+07	1.37992e+07	1.40397e+07	1.37992e+07	0.982871
qe	Medium	mLISSR	1	6	N-Term(Dimethyl:2H(6)); M1(Oxidation)	1	1	YML110C	COQ5	0	2	1	378.731	756.455	-0.652697	HCD	44.2922	250	13.1317	3181	qExPlus02_00983.raw	2.26	32	25	457711	0.0294	0.316	9102.34	406620	9102.34	406620	9102.34	406620	44.6721
Fusion	High	mFFSkVmLTR	1	10	N-Term(Dimethyl:2H(6)); K5(Dimethyl:2H(6)); M7(Oxidation)	1	1	YGR255C	COQ6	1	3	1	448.605	1343.8	1.9701	ETD	59.95	50	2.23205	1288	Fusion002161.raw	41.32	23	16	2.9934e+07	0	0.001495	3532.53	15555828	3532.53	15555828
Fusion	High	mFFSkVMLTR	1	10	N-Term(Dimethyl:2H(6)); K5(Dimethyl:2H(6))	1	1	YGR255C	COQ6	1	3	1	443.272	1327.8	-0.341874	HCD	15.7424	30.793	8.70312	5039	Fusion002161.raw	30.99	23	16	2.01471e+07	0	0.06717	3532.53	10357584	7065.07	25913412	7065.07	25913412	3667.82
qe	Medium	aDQENSPLHTVGFD	2	15	N-Term(Dimethyl)	1	1	YLR038C	COX12	0	2	1	779.363	1557.72	0.213644	HCD	71.8339	250	46.9365	11865	qExPlus02_00984.raw	24.02	32	25	627447	0.01252	0.1921	361366	9102.34	361366	9102.34	361366	9102.34	0.0251887
qe	High	aDQENSPLHTVGFDAR	2	17	N-Term(Dimethyl)	1	1	YLR038C	COX12	0	2	1	892.931	1784.85	-1.20442	HCD	0.720361	0.507	34.7636	8814	qExPlus02_00984.raw	120.04	34	27	1172497102	0	5.282e-09	1172497102	4.59273e+08	1172497102	4.59273e+08
qe	High	aDQENSPLHTVGFDAR	2	17	N-Term(Dimethyl)	1	1	YLR038C	COX12	0	2	1	892.93	1784.85	-1.61478	HCD	0	250	35.586	9037	qExPlus02_00984.raw	110.68	33	27	611427	0	8.911e-08		482499	1172497102	4.59755e+08
qe	High	aDQENSPLHTVGFDAR	2	17	N-Term(Dimethyl:2H(6))	1	1	YLR038C	COX12	0	2	1	895.948	1790.89	-3.34875	HCD	0	250	35.655	9055	qExPlus02_00984.raw	114.95	32	25	2.62603e+06	0	2.119e-08	3634482	2.09924e+06	1176131584	4.61854e+08
qe	High	aDQENSPLHTVGFDAR	2	17	N-Term(Dimethyl)	1	1	YLR038C	COX12	0	2	1	892.93	1784.85	-1.4096	HCD	0	250	37.2579	9481	qExPlus02_00984.raw	92.68	34	27	2.48647e+06	0	1.288e-08	1.98752e+06	422066	1.17812e+09	4.62276e+08	1.17812e+09	4.62276e+08	0.392385
qe_Acetyl	High	aDQENSPLHTVGFDAR	2	17	N-Term(Acetyl)	1	1	YLR038C	COX12	0	2	1	899.92	1798.83	-1.00091	HCD	1.79067	6.97913	47.7806	12681	qExPlus02_00983.raw	105.96	34	27	1.0018e+09	0	0.003145			0	0
qe_Acetyl	High	aDQENSPLHTVGFDAR	2	17	N-Term(Acetyl)	1	1	YLR038C	COX12	0	2	1	899.92	1798.83	-2.01882	HCD	7.32992	250	48.3691	12822	qExPlus02_00983.raw	113.07	32	25	1.46655e+06	0	3.037e-05			0	0
qe_Acetyl	High	aDQENSPLHTVGFDAR	2	17	N-Term(Acetyl)	1	1	YLR038C	COX12	0	2	1	899.921	1798.83	-0.797325	HCD	1.6988	217.991	48.0494	12747	qExPlus02_00983.raw	119.49	32	25		0	8.119e-05			0	0	0	0
qe	High	aDQENSPLHTVGFDAR	2	17	N-Term(Dimethyl:2H(6))	1	1	YLR038C	COX12	0	3	1	597.636	1790.89	-0.766111	HCD	11.5812	105.9	34.5262	8745	qExPlus02_00984.raw	75.78	32	25	1.83509e+07	0	8.61e-06	8.67472e+06	1.78466e+07	8.67472e+06	1.78466e+07
qe	High	aDQENSPLHTVGFDAR	2	17	N-Term(Dimethyl:2H(6))	1	1	YLR038C	COX12	0	3	1	597.635	1790.89	-1.48181	HCD	7.61378	3.00041	34.7927	8824	qExPlus02_00984.raw	78.62	32	25	6.30067e+08	0	1.321e-05	1037917640	629631637	1.04659e+09	6.47478e+08
qe	High	aDQENSPLHTVGFDAR	2	17	N-Term(Dimethyl)	1	1	YLR038C	COX12	0	3	1	595.623	1784.85	-0.904193	HCD	22.0252	128.762	35.3193	8963	qExPlus02_00984.raw	70.81	34	27	6.19988e+06	0	2.722e-07	1.81284e+06		1.04841e+09	6.47478e+08	1.04841e+09	6.47478e+08	0.617584
qe_Acetyl	High	aDQENSPLHTVGFDAR	2	17	N-Term(Acetyl)	1	1	YLR038C	COX12	0	3	1	600.283	1798.83	-1.24589	HCD	1.51044	67.2756	47.6722	12653	qExPlus02_00983.raw	68.48	32	25	5.27725e+07	0	0.0009351			0	0	0	0
Fusion	Medium	aDQENSPLHTVGFDAR	2	17	N-Term(Dimethyl)	1	1	YLR038C	COX12	0	3	1	595.625	1784.86	1.96828	HCD	68.3123	250	34.8526	18832	Fusion002161.raw	9.63	19	13	546717	0.01954	0.2644	221316		221316	0
Fusion	Medium	aDQENSPLHTVGFDAR	2	17	N-Term(Dimethyl)	1	1	YLR038C	COX12	0	3	1	595.624	1784.86	0.326867	ETD	6.97832	50	73.1648	30753	Fusion002161.raw	20.9	19	13	2.59988e+06	0.04857	0.4141	2.59988e+06	1.63849e+06	2.8212e+06	1.63849e+06
Fusion	High	aDQENSPLHTVGFDAR	2	17	N-Term(Dimethyl)	1	1	YLR038C	COX12	0	3	1	595.624	1784.86	0.429455	HCD	4.66485	37.648	59.192	27267	Fusion002161.raw	24.66	19	13	2.73701e+06	0.00693	0.2551	2.55123e+06	1.6169e+06	5.37242e+06	3.25539e+06	5.37242e+06	3.25539e+06	0.605945
qe	Medium	skYAWYTR	2	9	N-Term(Dimethyl); K2(Dimethyl)	1	1	YML129C	COX14	1	2	1	565.802	1130.6	-2.28046	HCD	6.90169	11.8204	20.3339	4965	qExPlus02_00984.raw	41.2	35	28	6.41929e+07	0.01252	0.1894			0	0
qe	High	skYAWYTR	2	9	N-Term(Dimethyl); K2(Dimethyl)	1	1	YML129C	COX14	1	2	1	565.803	1130.6	-0.552945	HCD	0	191.285	20.6133	5039	qExPlus02_00984.raw	39.6	36	29	1.10827e+07	0.0008655	0.01778	1.10827e+07	8.62213e+06	1.10827e+07	8.62213e+06
qe	High	skYAWYTR	2	9	N-Term(Dimethyl); K2(Dimethyl)	1	1	YML129C	COX14	1	2	1	565.803	1130.6	-1.30873	HCD	0	250	21.2535	5199	qExPlus02_00984.raw	34.65	35	28	1.61062e+06	0.004844	0.04071	1.61062e+06	2.66985e+06	1.26933e+07	1.1292e+07	1.26933e+07	1.1292e+07	0.889601
qe_Acetyl	High	skYAWYTR	2	9	N-Term(Acetyl); K2(Dimethyl:2H(6))	1	1	YML129C	COX14	1	2	1	575.81	1150.61	-2.94712	HCD	18.7899	13.9161	32.864	8984	qExPlus02_00983.raw	29.4	34	27	1.87557e+08	0.001447	0.0267	1.65755e+08	1.87557e+08	1.65755e+08	1.87557e+08	1.65755e+08	1.87557e+08	1.13153
qe_Acetyl	High	kTVSIRP	51	57	N-Term(Acetyl); K1(Dimethyl)	1	1	YER141W	COX15	1	1	1	870.541	870.541	0.119397	HCD	2.13433	41.0485	29.6963	8002	qExPlus02_00983.raw	34.27	33	26	2.30158e+09	0.005022	0.07445	1465957632	19568.4	1465957632	19568.4	1465957632	19568.4	1.33485e-05
qe_Acetyl	Medium	kTVSIRP	51	57	N-Term(Acetyl); K1(Dimethyl)	1	1	YER141W	COX15	1	2	1	435.772	870.538	-3.61197	HCD	0	48.9762	30.6698	8285	qExPlus02_00983.raw	17.77	35	28	3.65498e+07	0.01654	0.1948	32738948	19568.4	32738948	19568.4	32738948	19568.4	0.000597709
qe	High	sESNPIESR	71	79	N-Term(Dimethyl)	1	1	YER141W	COX15	0	2	1	523.759	1046.51	-1.40011	HCD	0	250	14.5033	3512	qExPlus02_00983.raw	29.56	34	27	225419	0.005141	0.06622		143967	0	143967	0	143967
qe_Acetyl	High	sFSGkkFR	2	9	N-Term(Acetyl); K5(Dimethyl:2H(6)); K6(Dimethyl:2H(6))	1	1	YJL003W	COX16	2	2	1	533.844	1066.68	0.592624	HCD	14.5384	250	17.0309	4156	qExPlus02_00984.raw	29.04	31	24	6.93016e+07	0	0.01315	6.38566e+07	6.93016e+07	6.38566e+07	6.93016e+07
qe_Acetyl	Medium	sFSGkkFR	2	9	N-Term(Acetyl); K5(Dimethyl); K6(Dimethyl)	1	1	YJL003W	COX16	2	2	1	527.805	1054.6	-0.66946	HCD	12.9974	250	17.1082	4175	qExPlus02_00984.raw	23.37	31	24	1.69679e+07	0.02352	0.2299	1.68729e+07	2.0379e+07	8.07295e+07	8.96806e+07	8.07295e+07	8.96806e+07	1.11088
qe_Acetyl	High	sGNPGSSLSALRPTPPER	2	19	N-Term(Acetyl)	1	1	YLL018C-A	COX19	0	2	1	932.977	1864.95	-2.19607	HCD	1.53516	250	42.041	11288	qExPlus02_00983.raw	27.97	35	28	2.43565e+07	0.001447	0.03746			0	0	0	0
qe	High	tVPTDLDQETGLAR	55	68	N-Term(Dimethyl:2H(6))	1	1	YGL187C	COX4	0	2	1	775.419	1549.83	-2.50618	HCD	0	250	43.0188	11518	qExPlus02_00983.raw	48.47	34	27	464109	0	0.003158	723220		723220	0	723220	0
qe_Acetyl	High	mLRNTFTR	1	8	N-Term(Acetyl)	1	1	YNL052W	COX5A	1	2	1	540.783	1080.56	-2.31455	HCD	24.7683	250	37.1765	10126	qExPlus02_00983.raw	17.99	34	27	1.96973e+06	0.001447	0.01982			0	0	0	0
qe	High	aQTHALSNAAVmDLQSR	21	37	N-Term(Dimethyl:2H(6)); M12(Oxidation)	1	1	YNL052W	COX5A	0	2	1	931.986	1862.96	-0.912895	HCD	0	250	25.3542	6257	qExPlus02_00984.raw	95.98	33	26	1.46952e+08	0	9.432e-08	208566800	1.46952e+08	208566800	1.46952e+08
qe	High	aQTHALSNAAVmDLQSR	21	37	N-Term(Dimethyl); M12(Oxidation)	1	1	YNL052W	COX5A	0	2	1	928.966	1856.93	-1.53913	HCD	0	65.0036	25.6456	6341	qExPlus02_00984.raw	97.34	35	28	5.42667e+07	0	4.884e-10	52166432	3.19714e+07	260733232	1.78924e+08
qe	High	aQTHALSNAAVmDLQSR	21	37	N-Term(Dimethyl); M12(Oxidation)	1	1	YNL052W	COX5A	0	2	1	928.965	1856.92	-2.59093	HCD	0	250	25.9183	6414	qExPlus02_00984.raw	98.58	35	28	1.65303e+07	0	2.752e-07	1.36343e+07	3.07848e+06	2.74368e+08	1.82002e+08
qe	High	aQTHALSNAAVmDLQSR	21	37	N-Term(Dimethyl); M12(Oxidation)	1	1	YNL052W	COX5A	0	2	1	928.965	1856.92	-3.11684	HCD	0	250	26.2482	6492	qExPlus02_00984.raw	101.38	35	28	2.23608e+06	0	5.991e-07	1.02139e+06		2.75389e+08	1.82002e+08
qe	High	aQTHALSNAAVmDLQSR	21	37	N-Term(Dimethyl); M12(Oxidation)	1	1	YNL052W	COX5A	0	2	1	928.968	1856.93	0.0385773	HCD	0	250	26.5316	6560	qExPlus02_00984.raw	117.65	35	28	850139	0	8.178e-11	850139	487167	2.76239e+08	1.82489e+08
qe	High	aQTHALSNAAVmDLQSR	21	37	N-Term(Dimethyl:2H(6)); M12(Oxidation)	1	1	YNL052W	COX5A	0	2	1	931.989	1862.97	3.01859	HCD		250	26.5469	6564	qExPlus02_00984.raw	98.03	34	27	81400.1	0	7.742e-05	264503		2.76504e+08	1.82489e+08
qe	High	aQTHALSNAAVmDLQSR	21	37	N-Term(Dimethyl); M12(Oxidation)	1	1	YNL052W	COX5A	0	2	1	928.968	1856.93	0.695955	HCD		250	26.9211	6652	qExPlus02_00984.raw	58.2	35	28	494179	0	0.0009613	181820	9102.34	2.76685e+08	1.82498e+08
qe	High	aQTHALSNAAVmDLQSR	21	37	N-Term(Dimethyl); M12(Oxidation)	1	1	YNL052W	COX5A	0	2	1	928.967	1856.93	-1.21044	HCD	0	250	28.1606	6982	qExPlus02_00984.raw	108.36	35	28	808607	0	6.372e-08			2.76685e+08	1.82498e+08
qe	High	aQTHALSNAAVmDLQSR	21	37	N-Term(Dimethyl); M12(Oxidation)	1	1	YNL052W	COX5A	0	2	1	928.968	1856.93	0.235791	HCD	0	250	28.7578	7130	qExPlus02_00984.raw	89.94	35	28	4.28641e+06	0	7.902e-09	1.78011e+06		2.78465e+08	1.82498e+08
qe	High	aQTHALSNAAVmDLQSR	21	37	N-Term(Dimethyl); M12(Oxidation)	1	1	YNL052W	COX5A	0	2	1	928.969	1856.93	0.761693	HCD	0	250	29.6423	7365	qExPlus02_00984.raw	60.68	35	28	7058949	0	8.517e-06	7058949	3.76002e+06	2.85524e+08	1.86258e+08
qe	High	aQTHALSNAAVmDLQSR	21	37	N-Term(Dimethyl); M12(Oxidation)	1	1	YNL052W	COX5A	0	2	1	928.967	1856.93	-0.881751	HCD	0	250	30.3743	7552	qExPlus02_00984.raw	42.55	35	28	3.53623e+06	0	0.002574	3.06242e+06	931383	2.88587e+08	1.8719e+08
qe	High	aQTHALSNAAVMDLQSR	21	37	N-Term(Dimethyl:2H(6))	1	1	YNL052W	COX5A	0	2	1	923.989	1846.97	0.291572	HCD	0	250	30.5916	7603	qExPlus02_00984.raw	114.88	34	27	1.07565e+09	0	1.402e-09	9102.34	401339904	2.88596e+08	5.8853e+08
qe	High	aQTHALSNAAVmDLQSR	21	37	N-Term(Dimethyl); M12(Oxidation)	1	1	YNL052W	COX5A	0	2	1	928.961	1856.91	-7.38979	HCD	9.59557	42.2025	30.7229	7641	qExPlus02_00984.raw	73.71	35	28	1.69153e+07	0	4.569e-05	9290955	9102.34	2.97887e+08	5.88539e+08
qe	High	aQTHALSNAAVmDLQSR	21	37	N-Term(Dimethyl:2H(6)); M12(Oxidation)	1	1	YNL052W	COX5A	0	2	1	931.984	1862.96	-2.48549	HCD	6.03969	61.2785	30.8133	7674	qExPlus02_00984.raw	95.63	33	26	2.55812e+07	0	8.595e-07	87769954	2.55812e+07	3.85657e+08	6.1412e+08
qe	High	aQTHALSNAAVMDLQSR	21	37	N-Term(Dimethyl)	1	1	YNL052W	COX5A	0	2	1	920.97	1840.93	-0.269843	HCD	0	11.0018	30.842	7687	qExPlus02_00984.raw	128.29	35	28	2.39296e+08	0	9.069e-10	233658864	9.37742e+07	6.19316e+08	7.07894e+08
qe	High	aQTHALSNAAVMDLQSR	21	37	N-Term(Dimethyl)	1	1	YNL052W	COX5A	0	2	1	920.969	1840.93	-1.19817	HCD	0	23.9824	31.1078	7760	qExPlus02_00984.raw	126.55	35	28	6.31231e+07	0	8.448e-08	6.31231e+07	3.19041e+07	6.82439e+08	7.39798e+08
qe	High	aQTHALSNAAVmDLQSR	21	37	N-Term(Dimethyl:2H(6)); M12(Oxidation)	1	1	YNL052W	COX5A	0	2	1	931.987	1862.97	0.0699754	HCD	0	250	31.1667	7777	qExPlus02_00984.raw	95.66	34	27	5.96207e+06	0	3.096e-05	1.76755e+07	5.96207e+06	7.00114e+08	7.4576e+08
qe	High	aQTHALSNAAVmDLQSR	21	37	N-Term(Dimethyl); M12(Oxidation)	1	1	YNL052W	COX5A	0	2	1	928.971	1856.94	3.91711	HCD	0	250	31.3019	7813	qExPlus02_00984.raw	86.95	35	28	888745	0	8.921e-07			7.00114e+08	7.4576e+08
qe	High	aQTHALSNAAVMDLQSR	21	37	N-Term(Dimethyl)	1	1	YNL052W	COX5A	0	2	1	920.971	1840.94	1.18895	HCD	0	250	31.4336	7849	qExPlus02_00984.raw	120.51	35	28	2.40289e+07	0	9.286e-08	2.40289e+07	1.25005e+07	7.24143e+08	7.58261e+08	7.24143e+08	7.58261e+08	1.04711
qe	High	aQTHALSNAAVmDLQSR	21	37	N-Term(Dimethyl:2H(6)); M12(Oxidation)	1	1	YNL052W	COX5A	0	3	1	621.659	1862.96	-2.59099	HCD	51.9116	250	25.2151	6224	qExPlus02_00984.raw	48.91	33	26	530179	0	0.0008313	9102.34	307936	9102.34	307936
qe	High	aQTHALSNAAVmDLQSR	21	37	N-Term(Dimethyl); M12(Oxidation)	1	1	YNL052W	COX5A	0	3	1	619.645	1856.92	-4.11014	HCD	0.70966	44.2431	25.3845	6265	qExPlus02_00984.raw	69.21	35	28	816690098	0	5.615e-07	816690098	589888317	8.16699e+08	5.90196e+08
qe	High	aQTHALSNAAVmDLQSR	21	37	N-Term(Dimethyl:2H(6)); M12(Oxidation)	1	1	YNL052W	COX5A	0	3	1	621.659	1862.96	-1.8047	HCD	8.91316	26.5514	25.7437	6368	qExPlus02_00984.raw	81.57	34	27	90057548	0	0.0006432	1.71955e+08	90057548	9.88655e+08	6.80254e+08
qe	High	aQTHALSNAAVmDLQSR	21	37	N-Term(Dimethyl); M12(Oxidation)	1	1	YNL052W	COX5A	0	3	1	619.647	1856.93	-1.74358	HCD	1.30785	55.2506	25.9136	6413	qExPlus02_00984.raw	71.19	35	28	7.03363e+07	0	4.094e-05	7.03363e+07	1.84433e+07	1.05899e+09	6.98697e+08
qe	High	aQTHALSNAAVmDLQSR	21	37	N-Term(Dimethyl); M12(Oxidation)	1	1	YNL052W	COX5A	0	3	1	619.648	1856.93	0.425763	HCD	10.1346	75.8769	26.2228	6486	qExPlus02_00984.raw	75.47	35	28	1.73039e+07	0	2.663e-05	1.67324e+07	1.0916e+07	1.07572e+09	7.09613e+08
qe	High	aQTHALSNAAVmDLQSR	21	37	N-Term(Dimethyl:2H(6)); M12(Oxidation)	1	1	YNL052W	COX5A	0	3	1	621.66	1862.97	-0.428678	HCD	5.25621	183.062	26.7212	6606	qExPlus02_00984.raw	68.73	33	26	1.67043e+06	0	0.0006787			1.07572e+09	7.09613e+08
qe	High	aQTHALSNAAVmDLQSR	21	37	N-Term(Dimethyl); M12(Oxidation)	1	1	YNL052W	COX5A	0	3	1	619.647	1856.93	-0.65891	HCD	14.2418	250	28.2507	7004	qExPlus02_00984.raw	55.16	35	28	3.28788e+07	0	0.0005667	3.28788e+07	2.02893e+07	1.1086e+09	7.29902e+08
qe	High	aQTHALSNAAVmDLQSR	21	37	N-Term(Dimethyl); M12(Oxidation)	1	1	YNL052W	COX5A	0	3	1	619.646	1856.92	-2.72965	HCD	2.07736	35.4993	28.7764	7135	qExPlus02_00984.raw	67.51	35	28	4.15798e+07	0	6.651e-07	40681453	2.34732e+07	1.14928e+09	7.53376e+08
qe	High	aQTHALSNAAVmDLQSR	21	37	N-Term(Dimethyl:2H(6)); M12(Oxidation)	1	1	YNL052W	COX5A	0	3	1	621.659	1862.96	-2.09956	HCD	10.8681	41.2893	28.9376	7176	qExPlus02_00984.raw	76.14	33	27	2.5939e+07	0	1.912e-05	4.10389e+07	2.5939e+07	1.19032e+09	7.79315e+08
qe	High	aQTHALSNAAVmDLQSR	21	37	N-Term(Dimethyl); M12(Oxidation)	1	1	YNL052W	COX5A	0	3	1	619.647	1856.93	-0.264484	HCD	12.2875	250	29.0489	7206	qExPlus02_00984.raw	67.31	35	28	3.89978e+06	0	4.754e-05	1.23708e+06		1.19156e+09	7.79315e+08
qe	High	aQTHALSNAAVmDLQSR	21	37	N-Term(Dimethyl:2H(6)); M12(Oxidation)	1	1	YNL052W	COX5A	0	3	1	621.66	1862.96	-0.625252	HCD	0	130.007	29.3012	7268	qExPlus02_00984.raw	76.81	33	26	14112432	0	0.0008333	20023473	14112432	1.21158e+09	7.93427e+08
qe	High	aQTHALSNAAVmDLQSR	21	37	N-Term(Dimethyl:2H(6)); M12(Oxidation)	1	1	YNL052W	COX5A	0	3	1	621.659	1862.96	-1.90298	HCD	11.3847	134.624	29.5704	7343	qExPlus02_00984.raw	86.78	33	26	18270100	0	5.146e-06	29789395	18270100	1.24137e+09	8.11697e+08
qe	High	aQTHALSNAAVmDLQSR	21	37	N-Term(Dimethyl); M12(Oxidation)	1	1	YNL052W	COX5A	0	3	1	619.647	1856.93	-1.05334	HCD	9.09342	33.4603	29.8568	7419	qExPlus02_00984.raw	57.97	35	28	3.21123e+07	0	3.892e-06	3.12647e+07	16938655	1.27264e+09	8.28636e+08
qe	High	aQTHALSNAAVmDLQSR	21	37	N-Term(Dimethyl); M12(Oxidation)	1	1	YNL052W	COX5A	0	3	1	619.648	1856.93	0.918796	HCD	57.0951	250	30.1334	7496	qExPlus02_00984.raw	69.59	35	28	800470	0	0.0002719		386773	1.27264e+09	8.29023e+08
qe	High	aQTHALSNAAVmDLQSR	21	37	N-Term(Dimethyl); M12(Oxidation)	1	1	YNL052W	COX5A	0	3	1	619.648	1856.93	1.41183	HCD	27.101	250	30.4107	7561	qExPlus02_00984.raw	51.83	35	28	1.63308e+07	0	0.000127	1.63308e+07	8.9458e+06	1.28897e+09	8.37968e+08
qe	High	aQTHALSNAAVmDLQSR	21	37	N-Term(Dimethyl:2H(6)); M12(Oxidation)	1	1	YNL052W	COX5A	0	3	1	621.662	1862.97	2.22507	HCD	39.2396	250	30.4439	7568	qExPlus02_00984.raw	66.31	34	27	37979564	0	4.46e-05	9102.34	12932034	1.28898e+09	8.509e+08
qe	High	aQTHALSNAAVMDLQSR	21	37	N-Term(Dimethyl:2H(6))	1	1	YNL052W	COX5A	0	3	1	616.326	1846.96	-4.54044	HCD	44.5768	250	30.4694	7574	qExPlus02_00984.raw	34.21	33	26	1.94343e+06	0.002744	0.09466	9102.34	745036	1.28899e+09	8.51645e+08
qe	High	aQTHALSNAAVMDLQSR	21	37	N-Term(Dimethyl)	1	1	YNL052W	COX5A	0	3	1	614.316	1840.93	-0.409765	HCD	22.774	250	30.5869	7602	qExPlus02_00984.raw	84.78	35	28	190093	0	4.939e-08			1.28899e+09	8.51645e+08
qe	High	aQTHALSNAAVmDLQSR	21	37	N-Term(Dimethyl); M12(Oxidation)	1	1	YNL052W	COX5A	0	3	1	619.648	1856.93	0.327156	HCD	5.53867	5.42279	30.8077	7672	qExPlus02_00984.raw	73.19	35	28	163325360	0	4.397e-05			1.28899e+09	8.51645e+08
qe	High	aQTHALSNAAVMDLQSR	21	37	N-Term(Dimethyl)	1	1	YNL052W	COX5A	0	3	1	614.315	1840.93	-0.907082	HCD	0.485858	2.77864	30.8408	7686	qExPlus02_00984.raw	75.68	35	28	4.85012e+08	0	3.745e-07	4.85012e+08	1.87737e+08	1.774e+09	1.03938e+09
qe	High	aQTHALSNAAVMDLQSR	21	37	N-Term(Dimethyl)	1	1	YNL052W	COX5A	0	3	1	614.315	1840.93	-1.00655	HCD	0.28924	10.4138	31.1065	7759	qExPlus02_00984.raw	97.54	35	28	1.70432e+08	0	4.488e-07	1.70432e+08	8.15393e+07	1.94443e+09	1.12092e+09
qe	High	aQTHALSNAAVMDLQSR	21	37	N-Term(Dimethyl:2H(6))	1	1	YNL052W	COX5A	0	3	1	616.328	1846.97	-0.254008	HCD		250	31.3754	7834	qExPlus02_00984.raw	71.81	34	27	1.92921e+07	0	5.572e-05	3.48757e+07	1.92921e+07	1.97931e+09	1.14021e+09
qe	High	aQTHALSNAAVMDLQSR	21	37	N-Term(Dimethyl)	1	1	YNL052W	COX5A	0	3	1	614.315	1840.93	-1.20547	HCD	6.75797	60.8624	31.6442	7914	qExPlus02_00984.raw	75.15	35	28	4.78564e+07	0	1.627e-07	4.74142e+07	1.90598e+07	2.02672e+09	1.15927e+09	2.02672e+09	1.15927e+09	0.571995
qe	High	aLSNAAVmDLQSR	25	37	N-Term(Dimethyl); M8(Oxidation)	1	1	YNL052W	COX5A	0	2	1	710.364	1419.72	-3.44921	HCD		250	31.9576	8713	qExPlus02_00983.raw	74.46	35	28	2.56849e+06	0	3.665e-06	1.23455e+06		1.23455e+06	0
qe	High	aLSNAAVMDLQSR	25	37	N-Term(Dimethyl)	1	1	YNL052W	COX5A	0	2	1	702.367	1403.73	-3.65065	HCD	0	250	39.2946	10634	qExPlus02_00983.raw	52.69	36	29	1.73883e+06	0	4.071e-05	1240665		2.47522e+06	0	2.47522e+06	0
qe	High	nAAVMDLQSR	28	37	N-Term(Dimethyl)	1	1	YNL052W	COX5A	0	2	1	566.792	1132.58	-0.206549	HCD	0	66.1613	28.4316	7569	qExPlus02_00983.raw	49.78	35	28	1.55403e+06	0	0.01049		9102.34	0	9102.34	0	9102.34
qe_Acetyl	High	wENMPSTEQQDIVSkLSER	38	56	N-Term(Acetyl); K15(Dimethyl)	1	1	YNL052W	COX5A	1	3	1	783.052	2347.14	7.8257	HCD		250	49.1024	12397	qExPlus02_00984.raw	35.73	36	29	1.28136e+06	0	0.001563	692504	19568.4	692504	19568.4	692504	19568.4	0.0282574
qe	High	tEQQDIVSkLSER	44	56	N-Term(Dimethyl:2H(6)); K9(Dimethyl:2H(6))	1	1	YNL052W	COX5A	1	2	1	800.967	1600.93	-1.77187	HCD	0	250	30.3206	7539	qExPlus02_00984.raw	56.68	35	28	3.0484e+06	0	0.0003335	2.34712e+06	3.0484e+06	2.34712e+06	3.0484e+06	2.34712e+06	3.0484e+06	1.29878
qe	High	aIFRNPVINR	5	14	N-Term(Dimethyl:2H(6))	1	1	YHR051W	COX6	1	2	1	617.387	1233.77	-1.98791	HCD	7.44182	90.2517	29.8894	7432	qExPlus02_00984.raw	27.29	34	27	2.28926e+07	0	0.01472	9102.34	11957790	9102.34	11957790	9102.34	11957790	1313.71
qe	High	fRNPVINR	7	14	N-Term(Dimethyl:2H(6))	1	1	YHR051W	COX6	1	2	1	525.327	1049.65	-1.55888	HCD	46.5514	91.2525	20.4664	5001	qExPlus02_00984.raw	8.32	35	28	1.19605e+07	0.002744	0.1119	9102.34	7848527	9102.34	7848527	9102.34	7848527	862.254
qe	High	ySDAHDEETFEEFTAR	40	55	N-Term(Dimethyl:2H(6))	1	1	YHR051W	COX6	0	2	1	990.94	1980.87	0.430586	HCD	0	250	39.3106	10010	qExPlus02_00984.raw	90.11	26	19	4.02337e+06	0	1.291e-08	9102.34	1.06038e+06	9102.34	1.06038e+06
qe	High	ySDAHDEETFEEFTAR	40	55	N-Term(Dimethyl)	1	1	YHR051W	COX6	0	2	1	987.919	1974.83	-2.37942	HCD	0	250	39.4703	10047	qExPlus02_00984.raw	98.29	25	18	1.77944e+06	0	1.745e-10	1.77944e+06	1.29743e+07	1.78854e+06	1.40347e+07	1.78854e+06	1.40347e+07	7.84699
Fusion	High	ySDAHDEETFEEFTAR	40	55	N-Term(Dimethyl:2H(6))	1	1	YHR051W	COX6	0	2	1	990.938	1980.87	-2.15764	HCD	0	40.5729	1.71285	981	Fusion002161.raw	86.93	13	13	6.82333e+06	0	1.484e-05	3532.53	2.8672e+06	3532.53	2.8672e+06	3532.53	2.8672e+06	811.655
qe	High	ySDAHDEETFEEFTAR	40	55	N-Term(Dimethyl:2H(6))	1	1	YHR051W	COX6	0	3	1	660.962	1980.87	-0.562195	HCD	0	250	39.3153	10011	qExPlus02_00984.raw	66.79	25	18	3.18667e+06	0	0.0004706	9102.34	1.6238e+06	9102.34	1.6238e+06	9102.34	1.6238e+06	178.394
Fusion	High	ySDAHDEETFEEFTAR	40	55	N-Term(Dimethyl:2H(6))	1	1	YHR051W	COX6	0	3	1	660.963	1980.87	0.177299	HCD	0	40.5879	1.63608	935	Fusion002161.raw	59.96	13	13	2.54728e+08	0	0.0001789	1.74064e+07	2.53947e+08	1.74064e+07	2.53947e+08	1.74064e+07	2.53947e+08	14.5893
qe	High	sDAHDEETFEEFTAR	41	55	N-Term(Dimethyl:2H(6))	1	1	YHR051W	COX6	0	2	1	909.406	1817.81	-2.16405	HCD	0	250	36.319	9224	qExPlus02_00984.raw	96.17	25	18	6.99644e+07	0	2.512e-07	9102.34	25914860	9102.34	25914860
qe	High	sDAHDEETFEEFTAR	41	55	N-Term(Dimethyl)	1	1	YHR051W	COX6	0	2	1	906.389	1811.77	-0.451893	HCD	2.04497	2.56795	36.6063	9305	qExPlus02_00984.raw	89.07	26	19	1175911364	0	4.103e-06	1165189472	2.03913e+08	1.1652e+09	2.29828e+08
qe	High	sDAHDEETFEEFTAR	41	55	N-Term(Dimethyl:2H(6))	1	1	YHR051W	COX6	0	2	1	909.41	1817.81	1.32788	HCD	40.5003	250	38.0475	9676	qExPlus02_00984.raw	63.77	25	18	2.56657e+06	0	3.751e-06	9102.34	1072714	1.16521e+09	2.30901e+08
qe	High	sDAHDEETFEEFTAR	41	55	N-Term(Dimethyl)	1	1	YHR051W	COX6	0	2	1	906.393	1811.78	3.86018	HCD	0	250	38.2384	9721	qExPlus02_00984.raw	83.35	27	20	723526	0	1.31e-07	638405	336754	1.16585e+09	2.31238e+08
qe	High	sDAHDEETFEEFTAR	41	55	N-Term(Dimethyl)	1	1	YHR051W	COX6	0	2	1	906.389	1811.77	-0.249765	HCD	0	250	38.5723	9802	qExPlus02_00984.raw	66.53	26	19	1.89689e+06	0	5.168e-07		627596	1.16585e+09	2.31865e+08
qe	High	sDAHDEETFEEFTAR	41	55	N-Term(Dimethyl)	1	1	YHR051W	COX6	0	2	1	906.388	1811.77	-1.26041	HCD	14.9822	250	41.0671	10444	qExPlus02_00984.raw	47.44	26	19	653276	0	8.703e-06	416887	9102.34	1.16626e+09	2.31875e+08
qe	High	sDAHDEETFEEFTAR	41	55	N-Term(Dimethyl)	1	1	YHR051W	COX6	0	2	1	906.388	1811.77	-1.39516	HCD	37.3026	250	36.866	8885	qExPlus02_00986.raw	53.92	26	19	1.25064e+06	0	0.0001253	1.21381e+06	191782	1.16748e+09	2.32066e+08
qe	High	sDAHDEETFEEFTAR	41	55	N-Term(Dimethyl)	1	1	YHR051W	COX6	0	2	1	906.39	1811.77	0.154493	HCD	26.0207	250	38.365	9139	qExPlus02_00989.raw	63.83	26	19	7832865	0	9.18e-08	6.71948e+06	1.61954e+06	1.1742e+09	2.33686e+08	1.1742e+09	2.33686e+08	0.199018
qe	High	sDAHDEETFEEFTAR	41	55	N-Term(Dimethyl:2H(6))	1	1	YHR051W	COX6	0	3	1	606.609	1817.81	1.32048	HCD	27.9202	207.535	36.3696	9236	qExPlus02_00984.raw	71.89	25	18	2.215e+07	0	4.842e-05	1.08883e+07	2.215e+07	1.08883e+07	2.215e+07
qe	High	sDAHDEETFEEFTAR	41	55	N-Term(Dimethyl:2H(6))	1	1	YHR051W	COX6	0	3	1	606.608	1817.81	-0.794821	HCD	21.1243	14.7576	36.6443	9315	qExPlus02_00984.raw	78.21	25	18	4.4763e+07	0	0.0002638	2.04027e+08	4.4763e+07	2.14915e+08	6.6913e+07
qe	High	sDAHDEETFEEFTAR	41	55	N-Term(Dimethyl:2H(6))	1	1	YHR051W	COX6	0	3	1	606.608	1817.81	0.615379	HCD	36.8777	81.8803	36.9119	9395	qExPlus02_00984.raw	76.89	25	18	5.5927e+06	0	0.0007292			2.14915e+08	6.6913e+07
qe	High	sDAHDEETFEEFTAR	41	55	N-Term(Dimethyl)	1	1	YHR051W	COX6	0	3	1	604.596	1811.77	0.180759	HCD	0.784396	46.3998	36.9559	9406	qExPlus02_00984.raw	84.85	26	19	1.46887e+07	0	3.019e-05			2.14915e+08	6.6913e+07	2.14915e+08	6.6913e+07	0.311346
qe	High	dAHDEETFEEFTAR	42	55	N-Term(Dimethyl)	1	1	YHR051W	COX6	0	2	1	862.872	1724.74	-1.50971	HCD	0	250	38.4361	9156	qExPlus02_00989.raw	75.54	27	20	3.02755e+06	0	3.549e-05	2.39438e+06	9102.34	2.39438e+06	9102.34	2.39438e+06	9102.34	0.00380155
qe	High	tFEEFTAR	48	55	N-Term(Dimethyl)	1	1	YHR051W	COX6	0	2	1	514.755	1028.5	-2.77873	HCD	15.6785	250	31.9312	8705	qExPlus02_00983.raw	15.58	33	26	8.09209e+06	0.005141	0.05933	4880871	9102.34	4880871	9102.34	4880871	9102.34	0.0018649
qe_Acetyl	High	vNDLPTAIR	98	106	N-Term(Acetyl)	1	1	YHR051W	COX6	0	2	1	520.79	1040.57	-1.00906	HCD	12.8585	250	55.8361	14534	qExPlus02_00982.raw	28.81	35	28	2147438	0.001447	0.06089			0	0	0	0
Fusion	High	aNkVIQLQkIFQSSTkPLWWR	2	22	N-Term(Dimethyl:2H(6)); K3(Dimethyl:2H(6)); K9(Dimethyl:2H(6)); K16(Dimethyl:2H(6))	1	1	YMR256C	COX7	2	4	1	677.688	2707.73	-1.11103	ETD	39.2533	50	69.61	35613	Fusion002162.raw	21.66	15	13	6.7387e+07	0	0.02405	1.08584e+08	6.7387e+07	1.08584e+08	6.7387e+07	1.08584e+08	6.7387e+07	0.620595
Fusion	High	aNkVIQLQkIFQSSTkPLWWR	2	22	N-Term(Dimethyl:2H(6)); K3(Dimethyl:2H(6)); K9(Dimethyl:2H(6)); K16(Dimethyl:2H(6))	1	1	YMR256C	COX7	2	5	1	542.351	2707.73	-2.1078	ETD	35.5212	50	69.6022	35608	Fusion002162.raw	38.93	17	13	3.25633e+07	0	0.005671	5.45669e+07	3.25633e+07	5.45669e+07	3.25633e+07	5.45669e+07	3.25633e+07	0.596759
qe	High	mTIAPITGTIkR	1	12	N-Term(Dimethyl); M1(Oxidation); K11(Dimethyl)	1	1	YDL067C	COX9	1	2	1	687.412	1373.82	-1.29935	HCD	0	250	28.021	6944	qExPlus02_00984.raw	48.36	34	27	8.63217e+07	0	0.008326	85410845	6.26129e+06	85410845	6.26129e+06
qe	High	mTIAPITGTIkR	1	12	N-Term(Dimethyl); M1(Oxidation); K11(Dimethyl)	1	1	YDL067C	COX9	1	2	1	687.414	1373.82	1.98828	HCD	0	250	28.2922	7014	qExPlus02_00984.raw	47.25	33	26	1.16431e+07	0.0008655	0.02812	1.13795e+07	1.74825e+06	9.67904e+07	8.00954e+06
qe	High	mTIAPITGTIkR	1	12	N-Term(Dimethyl); M1(Oxidation); K11(Dimethyl)	1	1	YDL067C	COX9	1	2	1	687.412	1373.82	-1.56591	HCD	6.18808	250	28.5472	7075	qExPlus02_00984.raw	40.66	34	27	828089	0	0.003196	357586		9.7148e+07	8.00954e+06
qe	High	mTIAPITGTIkR	1	12	N-Term(Dimethyl); M1(Oxidation); K11(Dimethyl)	1	1	YDL067C	COX9	1	2	1	687.412	1373.82	-1.21049	HCD	9.51766	250	29.8505	7417	qExPlus02_00984.raw	25.14	34	27	2.83943e+06	0.005141	0.06682		9102.34	9.7148e+07	8.01864e+06
qe	High	mTIAPITGTIkR	1	12	N-Term(Dimethyl:2H(6)); M1(Oxidation); K11(Dimethyl:2H(6))	1	1	YDL067C	COX9	1	2	1	693.45	1385.89	-1.29136	HCD	0	250	35.6804	9061	qExPlus02_00984.raw	16.82	33	26	1.51576e+07	0.001946	0.08445	9102.34	8.00041e+06	9.71571e+07	1.6019e+07
qe	High	mTIAPITGTIkR	1	12	N-Term(Dimethyl); M1(Oxidation); K11(Dimethyl)	1	1	YDL067C	COX9	1	2	1	687.412	1373.82	-1.56591	HCD	45.4189	250	35.7369	9075	qExPlus02_00984.raw	33.62	34	27	77920748	0.0008655	0.01185	72979118	1.30148e+07	1.70136e+08	2.90338e+07
qe	High	mTIAPITGTIkR	1	12	N-Term(Dimethyl); K11(Dimethyl)	1	1	YDL067C	COX9	1	2	1	679.416	1357.83	1.14358	HCD	17.2827	250	35.781	9085	qExPlus02_00984.raw	41.08	33	26	9.81194e+07	0	0.006482	9.81194e+07	2.29261e+07	2.68256e+08	5.19599e+07
qe	High	mTIAPITGTIkR	1	12	N-Term(Dimethyl); M1(Oxidation); K11(Dimethyl)	1	1	YDL067C	COX9	1	2	1	687.415	1373.82	3.05453	HCD	0	250	36.2786	9214	qExPlus02_00984.raw	26.26	33	26	1.76579e+06	0.001683	0.03198	778874	9102.34	2.69034e+08	5.1969e+07	2.69034e+08	5.1969e+07	0.193169
Fusion	High	mTIAPITGTIkR	1	12	N-Term(Dimethyl:2H(6)); K11(Dimethyl:2H(6))	1	1	YDL067C	COX9	1	2	1	685.454	1369.9	1.57567	HCD	33.9567	31.4079	0.300855	161	Fusion002161.raw	31.26	21	14	3.67525e+06	0	0.1716	27993904	3310774	27993904	3310774	27993904	3310774	0.118268
Fusion	Medium	mTIAPITGTIkR	1	12	N-Term(Dimethyl); K11(Dimethyl)	1	1	YDL067C	COX9	1	3	1	453.281	1357.83	2.99913	ETD	53.3997	20.9688	0.405374	222	Fusion002161.raw	41.05	22	15	1.03691e+09	0.01014	0.2411	1032638162	1.41507e+08	1032638162	1.41507e+08	1032638162	1.41507e+08	0.137034
qe	High	tIAPITGTIkR	2	12	N-Term(Dimethyl:2H(6)); K10(Dimethyl:2H(6))	1	1	YDL067C	COX9	1	2	1	619.932	1238.86	-1.34675	HCD	33.7767	60.4044	27.2845	6746	qExPlus02_00984.raw	33.79	31	24	1.82315e+08	0	0.03437	155598336	182095070	155598336	182095070
qe	High	tIAPITGTIkR	2	12	N-Term(Dimethyl); K10(Dimethyl)	1	1	YDL067C	COX9	1	2	1	613.895	1226.78	-1.05773	HCD	31.8033	65.6907	27.4565	6787	qExPlus02_00984.raw	23.02	33	26	1.40625e+07	0.004844	0.04076	1.15744e+07	7.11591e+06	1.67173e+08	1.89211e+08
qe	Medium	tIAPITGTIkR	2	12	N-Term(Dimethyl); K10(Dimethyl)	1	1	YDL067C	COX9	1	2	1	613.894	1226.78	-2.05278	HCD	4.17393	39.9949	27.9561	6928	qExPlus02_00984.raw	15.75	33	26	8.09986e+06	0.01252	0.181	7003174	4244453	1.74176e+08	1.93455e+08
qe	Medium	tIAPITGTIkR	2	12	N-Term(Dimethyl); K10(Dimethyl)	1	1	YDL067C	COX9	1	2	1	613.896	1226.78	0.932354	HCD	47.5084	250	28.2461	7003	qExPlus02_00984.raw	5.55	32	25	279755	0.0414	0.3831			1.74176e+08	1.93455e+08	1.74176e+08	1.93455e+08	1.11069
qe	High	tIAPITGTIkR	2	12	N-Term(Dimethyl:2H(6)); K10(Dimethyl:2H(6))	1	1	YDL067C	COX9	1	3	1	413.623	1238.86	-2.04735	HCD	5.83506	47.2182	27.0372	6683	qExPlus02_00984.raw	32.47	31	24	1.83012e+07	0	0.0004595	4.51615e+06	1.60376e+07	4.51615e+06	1.60376e+07
qe	High	tIAPITGTIkR	2	12	N-Term(Dimethyl:2H(6)); K10(Dimethyl:2H(6))	1	1	YDL067C	COX9	1	3	1	413.624	1238.86	-1.67785	HCD	14.1269	140.74	27.3061	6751	qExPlus02_00984.raw	32.25	31	24	3.23545e+06	0	3.215e-05	1.537e+07	3.23545e+06	1.98861e+07	1.9273e+07
qe	High	tIAPITGTIkR	2	12	N-Term(Dimethyl); K10(Dimethyl)	1	1	YDL067C	COX9	1	3	1	409.598	1226.78	-2.61101	HCD	6.33134	212.52	27.3928	6772	qExPlus02_00984.raw	31.55	33	26	7.29406e+07	0	0.0003474	71679391	494110	9.15655e+07	1.97671e+07	9.15655e+07	1.97671e+07	0.21588
Fusion	High	tIAPITGTIkRR	2	13	N-Term(Dimethyl:2H(6)); K10(Dimethyl:2H(6))	1	1	YDL067C	COX9	2	4	1	349.496	1394.96	2.25866	ETD	9.31087	50	28.0607	13212	Fusion002162.raw	45.21	21	14	1.27727e+07	0	0.004262	1.5259e+07	1.27727e+07	1.5259e+07	1.27727e+07	1.5259e+07	1.27727e+07	0.837058
qe_Acetyl	High	sQVYFDVEADGQPIGR	2	17	N-Term(Acetyl)	1	1	YDR155C	CPR1	0	2	1	911.933	1822.86	-1.19171	HCD	0	250	68.2201	17612	qExPlus02_00982.raw	87.69	33	26	2.67457e+07	0	2.521e-05			0	0	0	0
qe_Acetyl	High	mEAISQLR	1	8	N-Term(Acetyl)	1	1	YLR087C	CSF1	0	2	1	495.258	989.509	0.768697	HCD	23.7137	250	59.3947	15467	qExPlus02_00982.raw	57.28	33	26	2.10109e+06	0.001447	0.04006			0	0	0	0
qe_Acetyl	Medium	skLGQEkNEVNYSDVR	2	17	N-Term(Acetyl); K2(Dimethyl); K7(Dimethyl)	1	1	YDR256C	CTA1	2	2	1	982.504	1964	-4.03821	HCD	79.7615	250	24.2231	5957	qExPlus02_00984.raw	78.46	36	29	827772	0.0206	0.2066	309576	19568.4	309576	19568.4	309576	19568.4	0.0632103
qe_Acetyl	High	skLGQEkNEVNYSDVR	2	17	N-Term(Acetyl); K2(Dimethyl); K7(Dimethyl)	1	1	YDR256C	CTA1	2	3	1	655.34	1964.01	-0.781985	HCD	0	250	24.168	5944	qExPlus02_00984.raw	34.61	36	29	5.84758e+06	0	0.02272	2304731	19568.4	2304731	19568.4	2304731	19568.4	0.00849052
qe	High	sTGNPINEPFVTQR	25	38	N-Term(Dimethyl:2H(6))	1	1	YDR256C	CTA1	0	2	1	797.427	1593.85	-2.71909	HCD	13.6354	250	38.6258	10469	qExPlus02_00983.raw	73.12	34	27	5906903	0	4.555e-06	4.33833e+06	5906903	4.33833e+06	5906903	4.33833e+06	5906903	1.36156
Fusion	High	mLWkNYVLSSSR	1	12	N-Term(Dimethyl:2H(6)); K4(Dimethyl:2H(6))	1	1	YOR037W	CYC2	1	3	1	517.974	1551.91	-1.03656	HCD	12.5558	34.1529	5.11662	2968	Fusion002161.raw	57.28	22	15	5.15817e+07	0	0.0003726	3.4092e+07	5.09755e+07	3.4092e+07	5.09755e+07	3.4092e+07	5.09755e+07	1.49523
qe	High	aSSYAQAQAVR	8	18	N-Term(Dimethyl:2H(6))	1	1	YDR430C	CYM1	0	2	1	593.329	1185.65	0.73538	HCD	0	250	14.7906	3582	qExPlus02_00983.raw	70.79	33	26	1.1521e+08	0	0.000192	119238882	1.1521e+08	119238882	1.1521e+08	119238882	1.1521e+08	0.966208
qe_Acetyl	High	mFSNLSkR	1	8	N-Term(Acetyl); K7(Dimethyl:2H(6))	1	1	YOR065W	CYT1	1	2	1	529.799	1058.59	-1.57309	HCD	2.87209	250	37.8237	10282	qExPlus02_00983.raw	31.25	34	27	3.41803e+07	0.006155	0.1082	19568.4	19600702	19568.4	19600702	19568.4	19600702	1001.65
qe_Acetyl	High	sQLPTDFASLIkR	2	14	N-Term(Acetyl); K12(Dimethyl)	1	1	YLR270W	DCS1	1	2	1	773.435	1545.86	0.0349639	HCD	0	250	67.5207	17516	qExPlus02_00983.raw	51.11	35	28	1.43024e+07	0	0.0079	1.43024e+07	8.83131e+06	1.43024e+07	8.83131e+06	1.43024e+07	8.83131e+06	0.617472
qe	Medium	fSISNR	7	12	N-Term(Dimethyl:2H(6))	1	1	YHR011W	DIA4	0	2	1	379.227	757.447	-0.645804	HCD	13.1793	250	21.0364	5213	qExPlus02_00983.raw	17.64	32	26	4.99451e+06	0.02733	0.3041	9102.34	3.84982e+06	9102.34	3.84982e+06	9102.34	3.84982e+06	422.948
Fusion	High	gIPGLLPQLkR	2	12	N-Term(Dimethyl:2H(6)); K10(Dimethyl:2H(6))	1	1	YDR263C	DIN7	1	3	1	420.637	1259.9	0.306428	HCD	13.3459	29.773	9.91557	5727	Fusion002161.raw	32.77	21	14	3.56719e+07	0	0.07461	2.30819e+06	3.46289e+07	2.30819e+06	3.46289e+07	2.30819e+06	3.46289e+07	15.0026
qe_Acetyl	High	sVPAIAPR	2	9	N-Term(Acetyl)	1	1	YOL021C	DIS3	0	2	1	426.75	852.492	-2.02528	HCD	9.07575	250	45.6841	11919	qExPlus02_00982.raw	26.06	34	27	20601249	0.003945	0.08542			0	0	0	0
qe_Acetyl	High	sIEYSVIVPAYHEkLNIkPLTTR	2	24	N-Term(Acetyl); K14(Dimethyl); K18(Dimethyl)	1	1	YPR183W	DPM1	1	3	1	923.856	2769.55	-0.64735	HCD	35.7905	250	57.2337	14388	qExPlus02_00984.raw	8.58	31	24	426490	0	0.06046	426490	55573.2	426490	55573.2
qe_Acetyl	High	sIEYSVIVPAYHEkLNIkPLTTR	2	24	N-Term(Acetyl); K14(Dimethyl:2H(6)); K18(Dimethyl:2H(6))	1	1	YPR183W	DPM1	1	3	1	927.879	2781.62	-2.64294	HCD	7.86686	250	57.0217	14338	qExPlus02_00984.raw	18.67	30	23	2.3139e+06	0	0.003779	1.66683e+06	2.01654e+06	2.09332e+06	2.07211e+06	2.09332e+06	2.07211e+06	0.98987
Fusion_Acetyl	High	sIEYSVIVPAYHEkLNIkPLTTR	2	24	N-Term(Acetyl); K14(Dimethyl:2H(6)); K18(Dimethyl:2H(6))	1	1	YPR183W	DPM1	1	3	1	927.883	2781.63	1.37248	HCD	0	40.693	25.051	14105	Fusion002161.raw	22.98	29	22	3.96349e+06	0	0.1462	6.39928e+06	3.96349e+06	6.39928e+06	3.96349e+06	6.39928e+06	3.96349e+06	0.619365
qe	High	fMTTQPQLNVTDAPPVLFTVQDTAR	24	48	N-Term(Dimethyl:2H(6))	1	1	YDR036C	EHD3	0	3	1	942.164	2824.48	-1.82327	HCD	0	250	74.4944	19199	qExPlus02_00983.raw	73.18	34	27	1.6754e+07	0	7.189e-06	9102.34	3850707	9102.34	3850707	9102.34	3850707	423.046
qe	High	mTTQPQLNVTDAPPVLFTVQDTAR	25	48	N-Term(Dimethyl:2H(6))	1	1	YDR036C	EHD3	0	3	1	893.142	2677.41	-0.307325	HCD	18.7656	250	69.5155	17985	qExPlus02_00983.raw	71.65	35	28	9.13162e+06	0	8.587e-07	9102.34	2.44464e+06	9102.34	2.44464e+06	9102.34	2.44464e+06	268.573
qe	High	nVTDAPPVLFTVQDTAR	32	48	N-Term(Dimethyl:2H(6))	1	1	YDR036C	EHD3	0	2	1	939.515	1878.02	-0.109994	HCD	0	250	59.5292	15558	qExPlus02_00983.raw	80.39	35	28	3.9522e+06	0	7.431e-06	2.76347e+07	3.9522e+06	2.76347e+07	3.9522e+06	2.76347e+07	3.9522e+06	0.143016
qe_Acetyl	High	sLISAVEDR	2	10	N-Term(Acetyl)	1	1	YMR031C	EIS1	0	2	1	516.272	1031.54	-0.685442	HCD	24.5346	250	60.4783	15722	qExPlus02_00982.raw	47.31	36	29	1.46033e+06	0.006948	0.1031			0	0	0	0
qe	High	sLDGTANkSkLGANAILGVSMAAAR	96	120	N-Term(Dimethyl); K8(Dimethyl); K10(Dimethyl)	1	1	YHR174W	ENO2	2	3	1	834.137	2500.4	2.34642	HCD	11.1202	250	44.9766	11401	qExPlus02_00984.raw	21.06	33	26	638026	0.004844	0.04399	182923	9102.34	182923	9102.34	182923	9102.34	0.0497605
qe	High	fYYYTSGAER	23	32	N-Term(Dimethyl:2H(6))	1	1	YAR002C-A	ERP1	0	2	1	645.818	1290.63	0.988525	HCD	0	250	30.2982	8167	qExPlus02_00983.raw	24.42	30	23	1.0103e+08	0	0.05007	231016215	1.0103e+08	231016215	1.0103e+08
qe	High	fYYYTSGAER	23	32	N-Term(Dimethyl)	1	1	YAR002C-A	ERP1	0	2	1	642.796	1284.59	-3.42377	HCD	24.2343	91.8706	30.6731	8286	qExPlus02_00983.raw	20.23	31	24	9.27759e+06	0	0.005235	7.02882e+06	9102.34	2.38045e+08	1.01039e+08	2.38045e+08	1.01039e+08	0.424453
qe	High	mTDNPPQEGLSGR	7	19	N-Term(Dimethyl)	1	1	YGR029W	ERV1	0	2	1	715.338	1429.67	-3.16303	HCD	9.46497	123.773	23.0437	5751	qExPlus02_00983.raw	48.57	32	25	21341687	0	0.00019	21341687	9.96096e+06	21341687	9.96096e+06
qe	High	mTDNPPQEGLSGR	7	19	N-Term(Dimethyl); M1(Oxidation)	1	1	YGR029W	ERV1	0	2	1	723.34	1445.67	2.41589	HCD		250	23.1645	5783	qExPlus02_00983.raw	20.73	31	24	827514	0.005141	0.05459	560682	9102.34	2.19024e+07	9.97006e+06	2.19024e+07	9.97006e+06	0.455205
qe	High	tDNPPQEGLSGR	8	19	N-Term(Dimethyl:2H(6))	1	1	YGR029W	ERV1	0	2	1	652.838	1304.67	-1.58258	HCD	0	250	18.5814	4568	qExPlus02_00983.raw	35.42	32	25	970573	0	0.006131		678009	0	678009	0	678009
qe_Acetyl	High	tDNPPQEGLSGR	8	19	N-Term(Acetyl)	1	1	YGR029W	ERV1	0	2	1	656.808	1312.61	-2.65364	HCD	0.924375	59.0848	31.4688	7917	qExPlus02_00982.raw	70.74	32	25	1.91531e+07	0	0.006793			0	0
qe_Acetyl	High	tDNPPQEGLSGR	8	19	N-Term(Acetyl)	1	1	YGR029W	ERV1	0	2	1	656.808	1312.61	-3.30463	HCD	10.748	250	31.2068	7845	qExPlus02_00982.raw	58.42	32	25	5.36343e+07	0	0.002634			0	0
qe_Acetyl	High	tDNPPQEGLSGR	8	19	N-Term(Acetyl)	1	1	YGR029W	ERV1	0	2	1	656.808	1312.61	-2.74664	HCD	0	250	31.8514	8027	qExPlus02_00982.raw	61.86	32	25	1.87335e+06	0	0.001537			0	0	0	0
qe_Acetyl	High	mLPTFkR	1	7	N-Term(Acetyl); M1(Oxidation); K6(Dimethyl:2H(6))	1	1	YBR026C	ETR1	1	2	1	492.793	984.579	-3.08648	HCD	42.7175	35.8608	36.5461	9967	qExPlus02_00983.raw	29.42	34	27	1.39248e+08	0.006155	0.1056	19568.4	81555400	19568.4	81555400
qe_Acetyl	High	mLPTFkR	1	7	N-Term(Acetyl); M1(Oxidation); K6(Dimethyl:2H(6))	1	1	YBR026C	ETR1	1	2	1	492.793	984.579	-2.40458	HCD	6.81603	188.621	38.3001	10392	qExPlus02_00983.raw	21.96	34	27	5.86078e+06	0.002723	0.06765	19568.4	2.95656e+06	39136.7	8.4512e+07
qe_Acetyl	High	mLPTFkR	1	7	N-Term(Acetyl); M1(Oxidation); K6(Dimethyl:2H(6))	1	1	YBR026C	ETR1	1	2	1	492.794	984.58	-1.78467	HCD	6.14481	250	37.1049	10108	qExPlus02_00983.raw	29.25	34	27	379087	0.00508	0.09532			39136.7	8.4512e+07
qe_Acetyl	High	mLPTFkR	1	7	N-Term(Acetyl); K6(Dimethyl:2H(6))	1	1	YBR026C	ETR1	1	2	1	484.797	968.586	-0.95164	HCD	16.0269	250	45.0146	11995	qExPlus02_00983.raw	23.81	33	26	2.71472e+08	0.001447	0.04457	19568.4	153172016	58705.1	2.37684e+08
qe_Acetyl	High	mLPTFkR	1	7	N-Term(Acetyl); K6(Dimethyl:2H(6))	1	1	YBR026C	ETR1	1	2	1	484.796	968.585	-2.27495	HCD	7.11185	250	45.8316	12196	qExPlus02_00983.raw	38.79	34	27	1.26067e+06	0.003945	0.08563	19568.4	711612	78273.4	2.38396e+08
qe_Acetyl	Medium	mLPTFkR	1	7	N-Term(Acetyl); M1(Oxidation); K6(Dimethyl:2H(6))	1	1	YBR026C	ETR1	1	2	1	492.796	984.584	2.4927	HCD	4.28285	67.8245	45.307	12067	qExPlus02_00983.raw	29.41	32	25	6.72401e+07	0.01294	0.1285	19568.4	37750320	97841.8	2.76146e+08	97841.8	2.76146e+08	2822.37
qe	High	vAQYTVPVGkAANEHETAPR	2	21	N-Term(Dimethyl:2H(6)); K10(Dimethyl:2H(6))	1	1	YOR317W	FAA1	1	3	1	736.082	2206.23	-2.22386	HCD	8.46581	250	22.1246	5414	qExPlus02_00984.raw	66.81	35	28	1.66599e+08	0	3.196e-06	1.46484e+08	1.66599e+08	1.46484e+08	1.66599e+08	1.46484e+08	1.66599e+08	1.13732
qe	Medium	aAPDYALTDLIESD	2	15	N-Term(Dimethyl:2H(6))	1	1	YER015W	FAA2	0	2	1	764.387	1527.77	-1.50332	HCD	22.6253	250	76.7986	19753	qExPlus02_00983.raw	22.64	32	25	745046	0.03517	0.3597		572785	0	572785
qe	High	aAPDYALTDLIESD	2	15	N-Term(Dimethyl)	1	1	YER015W	FAA2	0	2	1	761.369	1521.73	-0.986351	HCD		250	77.0847	19822	qExPlus02_00983.raw	52.19	34	27	1.26482e+06	0.005141	0.07916		5157822	0	5.73061e+06	0	5.73061e+06
qe	High	aAPDYALTDLIESDPR	2	17	N-Term(Dimethyl:2H(6))	1	1	YER015W	FAA2	0	2	1	890.964	1780.92	-1.80659	HCD	4.50687	20.6752	62.4553	16245	qExPlus02_00983.raw	81.9	34	27	2.92246e+08	0	1.279e-06	1.5087e+08	291127615	1.5087e+08	291127615	1.5087e+08	291127615	1.92966
qe_Acetyl	High	aAPDYALTDLIESDPR	2	17	N-Term(Acetyl)	1	1	YER015W	FAA2	0	2	1	894.935	1788.86	-0.953767	HCD	0	250	83.5261	21333	qExPlus02_00982.raw	79.79	36	29	3.98754e+07	0	0.0002789			0	0	0	0
Fusion_Acetyl	High	aAPDYALTDLIESDPR	2	17	N-Term(Acetyl)	1	1	YER015W	FAA2	0	2	1	894.937	1788.87	0.752207	HCD	52.0469	250	47.2069	23689	Fusion002161.raw	23.19	34	27	421350	0	0.1563			0	0	0	0
qe	High	aAPDYALTDLIESDPR	2	17	N-Term(Dimethyl:2H(6))	1	1	YER015W	FAA2	0	3	1	594.312	1780.92	-1.40288	HCD	3.66989	18.8531	62.3794	16227	qExPlus02_00983.raw	66.54	34	27	1.23327e+08	0	0.004978	6.38799e+07	1.23327e+08	6.38799e+07	1.23327e+08	6.38799e+07	1.23327e+08	1.93061
qe_Acetyl	High	aAPDYALTDLIESDPR	2	17	N-Term(Acetyl)	1	1	YER015W	FAA2	0	3	1	596.959	1788.86	-0.756567	HCD	2.04424	236.662	83.2791	21272	qExPlus02_00982.raw	52.53	34	27	3.31351e+07	0	0.004137			0	0	0	0
qe	High	aAPDYALTDLIESDPRFESLkTR	2	24	N-Term(Dimethyl:2H(6)); K21(Dimethyl:2H(6))	1	1	YER015W	FAA2	2	3	1	892.827	2676.47	0.88431	HCD	0	250	59.4999	14926	qExPlus02_00984.raw	31.58	35	28	1.14064e+07	0	0.01522	4.46982e+06	1.14064e+07	4.46982e+06	1.14064e+07	4.46982e+06	1.14064e+07	2.55186
qe_Acetyl	High	aAPDYALTDLIESDPRFESLkTR	2	24	N-Term(Acetyl); K21(Dimethyl:2H(6))	1	1	YER015W	FAA2	2	3	1	895.472	2684.4	-0.874506	HCD	66.4557	250	71.566	18468	qExPlus02_00983.raw	49.33	35	28	1.45027e+07	0	0.0009989	8.01654e+06	1.45027e+07	8.01654e+06	1.45027e+07	8.01654e+06	1.45027e+07	1.8091
Fusion	High	aAPDYALTDLIESDPRFESLkTR	2	24	N-Term(Dimethyl); K21(Dimethyl)	1	1	YER015W	FAA2	2	3	1	888.802	2664.39	1.46275	HCD	2.4476	40.693	28.0097	15643	Fusion002161.raw	17.75	24	17	3.09813e+06	0	0.1782	3.09813e+06	6.16895e+06	3.09813e+06	6.16895e+06	3.09813e+06	6.16895e+06	1.99119
Fusion	High	aAPDYALTDLIESDPRFESLkTR	2	24	N-Term(Dimethyl:2H(6)); K21(Dimethyl:2H(6))	1	1	YER015W	FAA2	2	4	1	669.871	2676.46	-0.169716	ETD	46.7171	50	27.8862	15580	Fusion002161.raw	42.87	24	17	2.2231e+08	0	0.01957	1.13806e+08	2.22267e+08	1.13806e+08	2.22267e+08	1.13806e+08	2.22267e+08	1.95304
qe	High	dLIESDPR	10	17	N-Term(Dimethyl:2H(6))	1	1	YER015W	FAA2	0	2	1	489.772	978.536	-1.09423	HCD	16.302	63.9882	29.7979	8034	qExPlus02_00983.raw	28.63	32	25	4.78945e+06	0.005154	0.1664	9102.34	3.39515e+06	9102.34	3.39515e+06	9102.34	3.39515e+06	372.998
qe_Acetyl	High	lAGYTkGSDEYIEELYSQLPLTSYPR	25	50	N-Term(Acetyl); K6(Dimethyl:2H(6))	1	1	YER015W	FAA2	1	3	1	1023.85	3069.55	-3.77066	HCD	64.6162	250	85.8745	21897	qExPlus02_00983.raw	21.39	35	28	613938	0.001447	0.02104	19568.4	501506	19568.4	501506	19568.4	501506	25.6284
qe	High	sQLPLTSYPR	41	50	N-Term(Dimethyl)	1	1	YER015W	FAA2	0	2	1	595.33	1189.65	-4.12999	HCD	6.38246	250	36.9106	10060	qExPlus02_00983.raw	31.67	36	29	3.13948e+06	0.0008655	0.02421	2.88938e+06	478589	2.88938e+06	478589	2.88938e+06	478589	0.165637
Fusion	High	kQAVAISNPDNEAGFSSIYR	57	76	N-Term(Dimethyl); K1(Dimethyl)	1	1	YER015W	FAA2	1	3	1	741.718	2223.14	-0.00280607	HCD	16.9835	40.693	2.54559	1473	Fusion002161.raw	34.95	24	17	7.74281e+06	0	0.03271	7.07072e+06	2.56212e+06	7.07072e+06	2.56212e+06	7.07072e+06	2.56212e+06	0.362357
qe_Acetyl	High	aTkQLLR	2	8	N-Term(Acetyl); K3(Dimethyl:2H(6))	1	1	YER183C	FAU1	1	2	1	453.305	905.604	-1.58622	HCD	30.7549	250	23.7818	5942	qExPlus02_00983.raw	18.49	30	23	9.2454e+07	0.001447	0.01812	68476525	92157106	68476525	92157106	68476525	92157106	1.34582
qe	High	gVEQILkR	2	9	N-Term(Dimethyl); K7(Dimethyl)	1	1	YKL060C	FBA1	1	2	1	499.822	998.637	1.19896	HCD	24.5896	250	21.8937	5351	qExPlus02_00984.raw	34.85	32	25	1.72091e+08	0.0008655	0.01403	1.72091e+08	5.47433e+07	1.72091e+08	5.47433e+07
qe	High	gVEQILkR	2	9	N-Term(Dimethyl); K7(Dimethyl)	1	1	YKL060C	FBA1	1	2	1	499.821	998.634	-1.73473	HCD	10.5174	16.5626	22.173	5426	qExPlus02_00984.raw	41.94	35	28	1.0707e+08	0.004844	0.04476	104611283	3.01025e+07	2.76702e+08	8.48458e+07
qe	High	gVEQILkR	2	9	N-Term(Dimethyl); K7(Dimethyl)	1	1	YKL060C	FBA1	1	2	1	499.821	998.635	-1.12354	HCD	0	250	22.7389	5563	qExPlus02_00984.raw	54.1	32	25	594249	0	0.0008419	594249	521872	2.77296e+08	8.53677e+07
qe	High	gVEQILkR	2	9	N-Term(Dimethyl); K7(Dimethyl)	1	1	YKL060C	FBA1	1	2	1	499.821	998.635	-0.879066	HCD	18.7688	250	22.9999	5628	qExPlus02_00984.raw	41.07	32	25	108915	0.0008655	0.02481	108915	87588.3	2.77405e+08	8.54552e+07	2.77405e+08	8.54552e+07	0.308052
Fusion	High	gVEQILkR	2	9	N-Term(Dimethyl:2H(6)); K7(Dimethyl:2H(6))	1	1	YKL060C	FBA1	1	3	1	337.575	1010.71	-1.6111	HCD	31.9692	214.067	72.8845	30640	Fusion002161.raw	4.75	23	16	163747	0	0.1745	530455	163747	530455	163747	530455	163747	0.308692
qe	High	sSSTAVAALEAAR	40	52	N-Term(Dimethyl)	1	1	YKL060C	FBA1	0	2	1	631.341	1261.67	-0.134111	HCD	0	189.525	31.3192	8522	qExPlus02_00983.raw	57.27	36	29	9.37918e+06	0	0.0001293	9.37918e+06	2.64881e+06	9.37918e+06	2.64881e+06
qe	High	sSSTAVAALEAAR	40	52	N-Term(Dimethyl)	1	1	YKL060C	FBA1	0	2	1	631.34	1261.67	-2.06916	HCD	14.7171	164.976	32.0276	8734	qExPlus02_00983.raw	100.1	36	29	1.21451e+08	0	2.021e-05	1.21208e+08	5.12499e+07	1.30587e+08	53898746	1.30587e+08	53898746	0.412742
qe	High	sSTAVAALEAAR	41	52	N-Term(Dimethyl)	1	1	YKL060C	FBA1	0	2	1	587.824	1174.64	-0.936318	HCD	4.87965	47.0097	30.8905	8366	qExPlus02_00983.raw	66.68	36	29	66206803	0	0.0001108	66206803	1.68945e+07	66206803	1.68945e+07	66206803	1.68945e+07	0.255177
qe	High	sTAVAALEAAR	42	52	N-Term(Dimethyl)	1	1	YKL060C	FBA1	0	2	1	544.309	1087.61	0.377831	HCD	57.6622	96.9936	29.6366	7985	qExPlus02_00983.raw	40.76	36	29	8.08251e+06	0	0.001409	5.78098e+06		5.78098e+06	0	5.78098e+06	0
Fusion	High	gISNEGQNASIkGAIAAAHYIR	74	95	N-Term(Dimethyl:2H(6)); K12(Dimethyl:2H(6))	1	1	YKL060C	FBA1	1	4	1	578.084	2309.31	0.549006	ETD	43.7926	50	2.16247	1247	Fusion002161.raw	20.77	24	17	1.07651e+07	0	0.04267	2.56712e+07	1.07651e+07	2.56712e+07	1.07651e+07	2.56712e+07	1.07651e+07	0.419346
qe	High	gAIAAAHYIR	86	95	N-Term(Dimethyl)	1	1	YKL060C	FBA1	0	2	1	535.808	1070.61	-1.15687	HCD	17.3632	11.584	20.5297	5018	qExPlus02_00984.raw	55.18	33	26	5.57759e+07	0	0.00142	5.43784e+07	1.99147e+07	5.43784e+07	1.99147e+07	5.43784e+07	1.99147e+07	0.366224
qe_Acetyl	High	mLINHLSkIR	1	10	N-Term(Acetyl); K8(Dimethyl:2H(6))	1	1	YBR047W	FMP23	1	2	1	650.905	1300.8	-0.880229	HCD	30.898	138.49	41.523	10569	qExPlus02_00984.raw	39.79	32	25	3.99987e+07	0.001447	0.02094	19568.4	19599018	19568.4	19599018
qe_Acetyl	Medium	mLINHLSkIR	1	10	N-Term(Acetyl); K8(Dimethyl:2H(6))	1	1	YBR047W	FMP23	1	2	1	650.904	1300.8	-1.81865	HCD	4.8509	41.2091	41.7993	10642	qExPlus02_00984.raw	31.54	32	25	1.37375e+07	0.03153	0.2084	19568.4	6.83814e+06	39136.7	2.64372e+07	39136.7	2.64372e+07	675.508
Fusion_Acetyl	High	mLINHLSkIR	1	10	N-Term(Acetyl); K8(Dimethyl:2H(6))	1	1	YBR047W	FMP23	1	3	1	434.273	1300.8	0.68129	ETD	3.18955	50	7.90432	4578	Fusion002161.raw	40.85	32	25	1.90735e+08	0	0.004998		93070848	0	93070848	0	93070848
qe_Acetyl	High	sYNYLkAAR	2	10	N-Term(Acetyl); K6(Dimethyl)	1	1	YNL168C	FMP41	1	1	1	1155.61	1155.61	-1.5513	HCD	0	174.593	31.5197	8589	qExPlus02_00983.raw	48.14	34	27	1.32749e+07	0	0.01908	12733579	6.34459e+06	12733579	6.34459e+06	12733579	6.34459e+06	0.498256
qe	High	sYNYLkAAR	2	10	N-Term(Dimethyl); K6(Dimethyl)	1	1	YNL168C	FMP41	1	2	1	571.321	1141.63	-1.51376	HCD	11.5919	250	18.717	4565	qExPlus02_00984.raw	39.37	34	27	8.46515e+06	0.0008655	0.01154	7.66352e+06	8.79908e+06	7.66352e+06	8.79908e+06	7.66352e+06	8.79908e+06	1.14818
qe_Acetyl	High	sYNYLkAAR	2	10	N-Term(Acetyl); K6(Dimethyl:2H(6))	1	1	YNL168C	FMP41	1	2	1	581.33	1161.65	0.0194475	HCD	6.50821	128.434	31.3574	8535	qExPlus02_00983.raw	46.92	33	26	1.1042e+09	0	0.001007	1857507029	1.1042e+09	1857507029	1.1042e+09	1857507029	1.1042e+09	0.594453
qe_Acetyl	High	sASAFNFAFR	2	11	N-Term(Acetyl)	1	1	YGR243W	FMP43	0	1	1	1159.55	1159.55	-2.82825	HCD	0	250	71.1208	18321	qExPlus02_00982.raw	34.76	33	26	900073	0.001447	0.02862			0	0	0	0
qe	High	sASAFNFAFR	2	11	N-Term(Dimethyl:2H(6))	1	1	YGR243W	FMP43	0	2	1	576.31	1151.61	0.227277	HCD	16.3858	250	49.1318	13012	qExPlus02_00983.raw	51.85	33	26	1.67065e+07	0	0.004433	9033101	1.60503e+07	9033101	1.60503e+07	9033101	1.60503e+07	1.77683
qe_Acetyl	High	sASAFNFAFR	2	11	N-Term(Acetyl)	1	1	YGR243W	FMP43	0	2	1	580.278	1159.55	-3.2083	HCD	18.2788	250	71.7568	18476	qExPlus02_00982.raw	63.97	33	26	443366	0	0.007819			0	0
qe_Acetyl	High	sASAFNFAFR	2	11	N-Term(Acetyl)	1	1	YGR243W	FMP43	0	2	1	580.279	1159.55	-2.15556	HCD	0	128.34	71.4905	18411	qExPlus02_00982.raw	75.52	33	26	5.38184e+08	0	0.004842			0	0
qe_Acetyl	High	sASAFNFAFR	2	11	N-Term(Acetyl)	1	1	YGR243W	FMP43	0	2	1	580.279	1159.55	-1.31338	HCD	0	250	71.1461	18369	qExPlus02_00983.raw	59.66	33	26	4.58391e+06	0	0.002852			0	0
qe_Acetyl	Medium	sASAFNFAFR	2	11	N-Term(Acetyl)	1	1	YGR243W	FMP43	0	2	1	580.28	1159.55	-0.892282	HCD	0	250	71.3171	17742	qExPlus02_00984.raw	40.38	33	26	3.48529e+06	0.02654	0.1867			0	0	0	0
qe_Acetyl	High	sASAFNFAFRR	2	12	N-Term(Acetyl)	1	1	YGR243W	FMP43	1	2	1	658.331	1315.65	-0.350425	HCD	50.0154	93.213	53.2624	14042	qExPlus02_00983.raw	7.97	34	27	1.39991e+08	0.001447	0.02669			0	0	0	0
Fusion	High	sASAFNFAFRR	2	12	N-Term(Dimethyl:2H(6))	1	1	YGR243W	FMP43	1	3	1	436.576	1307.71	1.04856	HCD	35.1444	30.4929	2.09233	1205	Fusion002161.raw	26.94	20	13	2.48591e+07	0	0.06767	1.5572e+07	2.48591e+07	1.5572e+07	2.48591e+07	1.5572e+07	2.48591e+07	1.5964
qe_Acetyl	High	sAFNFAFR	4	11	N-Term(Acetyl)	1	1	YGR243W	FMP43	0	2	1	501.243	1001.48	-4.39579	HCD	10.2453	250	71.3109	18366	qExPlus02_00982.raw	34.07	32	25	3.03425e+06	0.005022	0.09277			0	0	0	0
qe	High	sFWkTLQR	2	9	N-Term(Dimethyl:2H(6)); K4(Dimethyl:2H(6))	1	1	YKR049C	FMP46	1	2	1	567.363	1133.72	-2.31648	HCD	0	113.891	27.6008	6831	qExPlus02_00984.raw	21.19	33	26	6.37814e+06	0	0.002983	9102.34	4.63505e+06	9102.34	4.63505e+06	9102.34	4.63505e+06	509.216
qe_Acetyl	High	sFWkTLQR	2	9	N-Term(Acetyl); K4(Dimethyl)	1	1	YKR049C	FMP46	1	2	1	568.316	1135.63	-0.388605	HCD	2.61551	69.8941	48.3044	12807	qExPlus02_00983.raw	32.73	35	28	143541954	0.006948	0.1081	143541954	226289022	143541954	226289022	143541954	226289022	1.57647
qe_Acetyl	High	tScPQGPVSLQR	61	72	N-Term(Acetyl); C3(Carbamidomethyl)	1	1	YKR049C	FMP46	0	2	1	686.336	1371.67	-2.41755	HCD	0	250	40.2897	10433	qExPlus02_00982.raw	29.33	34	27	4.80437e+06	0.002723	0.06709			0	0	0	0
qe	High	mNGLVLGATGLcGGGFLR	1	18	N-Term(Dimethyl:2H(6)); C12(Carbamidomethyl)	1	1	YER004W	FMP52	0	2	1	913.997	1826.99	-0.499687	HCD	6.12345	250	66.7425	17333	qExPlus02_00983.raw	74.89	35	28	4.2629e+06	0	0.0001093	9102.34	1.58125e+06	9102.34	1.58125e+06	9102.34	1.58125e+06	173.719
qe_Acetyl	High	mNGLVLGATGLcGGGFLR	1	18	N-Term(Acetyl); C12(Carbamidomethyl)	1	1	YER004W	FMP52	0	2	1	917.969	1834.93	0.791749	HCD	26.8078	250	90.2333	22968	qExPlus02_00982.raw	82.51	37	30	7.13152e+06	0	0.000355			0	0
qe_Acetyl	High	mNGLVLGATGLcGGGFLR	1	18	N-Term(Acetyl); M1(Oxidation); C12(Carbamidomethyl)	1	1	YER004W	FMP52	0	2	1	925.965	1850.92	-1.7439	HCD	0	250	80.3722	20564	qExPlus02_00982.raw	98.75	35	28	4.47381e+06	0	7.406e-06			0	0	0	0
qe_Acetyl	High	mNGLVLGATGLcGGGFLR	1	18	N-Term(Acetyl); C12(Carbamidomethyl)	1	1	YER004W	FMP52	0	3	1	612.314	1834.93	-1.9764	HCD	24.7203	250	90.2807	22979	qExPlus02_00982.raw	74.66	37	30	537085	0	0.0003155			0	0	0	0
qe_Acetyl	High	skLFSTVNSAR	2	12	N-Term(Acetyl); K2(Dimethyl)	1	1	YNL256W	FOL1	1	2	1	640.352	1279.7	-2.28109	HCD	18.6475	250	37.9218	10304	qExPlus02_00983.raw	39.77	34	27	4.85867e+06	0.006948	0.1137	4.85867e+06	2.21223e+07	4.85867e+06	2.21223e+07	4.85867e+06	2.21223e+07	4.55315
qe_Acetyl	High	sEVIEGNVkIDR	2	13	N-Term(Acetyl); K9(Dimethyl)	1	1	YNL135C	FPR1	1	2	1	714.887	1428.77	-1.92972	HCD	0	250	41.338	11118	qExPlus02_00983.raw	62.61	36	29	2.68928e+07	0	0.01478	2.65343e+07	2.52467e+07	2.65343e+07	2.52467e+07	2.65343e+07	2.52467e+07	0.951471
qe_Acetyl	High	aSSVPGPIDLPESR	2	15	N-Term(Acetyl)	1	1	YOR271C	FSF1	0	1	1	1466.75	1466.75	-2.08997	HCD	0	250	62.2717	16156	qExPlus02_00982.raw	62.64	34	27	8.36502e+07	0	0.006601			0	0	0	0
qe_Acetyl	High	aSSVPGPIDLPESR	2	15	N-Term(Acetyl)	1	1	YOR271C	FSF1	0	2	1	733.878	1466.75	-0.476249	HCD	0	250	62.6251	15666	qExPlus02_00984.raw	52.89	34	27	395646	0	0.01478			0	0
qe_Acetyl	High	aSSVPGPIDLPESR	2	15	N-Term(Acetyl)	1	1	YOR271C	FSF1	0	2	1	733.876	1466.74	-2.80655	HCD	4.07937	25.4539	62.5035	16219	qExPlus02_00982.raw	70.75	35	28	396302905	0	0.02637			0	0	0	0
qe_Acetyl	High	aSSVPGPIDLPESR	2	15	N-Term(Acetyl)	1	1	YOR271C	FSF1	0	3	1	489.586	1466.74	-3.7312	HCD	0	250	62.339	16173	qExPlus02_00982.raw	55.95	34	27	1.04185e+07	0	0.001805			0	0	0	0
qe	High	sFQNFkIGGAR	53	63	N-Term(Dimethyl); K6(Dimethyl)	1	1	YPL262W	FUM1	1	2	1	640.857	1280.71	-2.9517	HCD	10.4646	250	28.0793	6958	qExPlus02_00984.raw	52.54	35	28	2.20456e+06	0	0.001176	1.36686e+06	9102.34	1.36686e+06	9102.34	1.36686e+06	9102.34	0.00665929
qe_Acetyl	High	sFQNFkIGGAR	53	63	N-Term(Acetyl); K6(Dimethyl)	1	1	YPL262W	FUM1	1	2	1	647.851	1294.69	3.00706	HCD	2.70984	250	44.0589	11766	qExPlus02_00983.raw	51.32	35	28	1.67759e+07	0	0.00822	1.67759e+07	9.15278e+06	1.67759e+07	9.15278e+06	1.67759e+07	9.15278e+06	0.545593
qe	High	dSLGAAVkQQGPLEPTVGNSTAITEER	70	96	N-Term(Dimethyl); K8(Dimethyl)	1	1	YAL008W	FUN14	1	3	1	942.158	2824.46	-2.99229	HCD	15.2384	250	45.7855	12185	qExPlus02_00983.raw	86.65	35	28	8.74891e+07	0	1.342e-07	8.73349e+07	84544625	8.73349e+07	84544625
qe	High	dSLGAAVkQQGPLEPTVGNSTAITEER	70	96	N-Term(Dimethyl); K8(Dimethyl)	1	1	YAL008W	FUN14	1	3	1	942.161	2824.47	0.249124	HCD	0	250	46.1588	12273	qExPlus02_00983.raw	99.5	35	28	200635	0	4.482e-06	72062.4	9102.34	8.74069e+07	8.45537e+07	8.74069e+07	8.45537e+07	0.967357
qe	High	dSLGAAVkQQGPLEPTVGNSTAITEER	70	96	N-Term(Dimethyl); K8(Dimethyl)	1	1	YAL008W	FUN14	1	4	1	706.872	2824.47	-0.879327	HCD	0	250	45.8994	12212	qExPlus02_00983.raw	81.83	35	28	1.95576e+06	0	6.714e-05	491630		491630	0	491630	0
qe	High	dSLGAAVkQQGPLEPTVGNSTAITEERR	70	97	N-Term(Dimethyl); K8(Dimethyl)	1	1	YAL008W	FUN14	2	3	1	994.193	2980.56	-1.86497	HCD	0	250	39.5433	10068	qExPlus02_00984.raw	70.97	35	28	27828731	0	1.168e-07	27828731	2.8987e+07	27828731	2.8987e+07	27828731	2.8987e+07	1.04162
qe	High	qQGPLEPTVGNSTAITEER	78	96	N-Term(Dimethyl)	1	1	YAL008W	FUN14	0	2	1	1028.02	2055.03	-0.278361	HCD	16.8398	250	38.8699	10527	qExPlus02_00983.raw	131.25	36	29	5.95922e+06	0	5.265e-10	5.68134e+06	826232	5.68134e+06	826232	5.68134e+06	826232	0.145429
qe	High	qQGPLEPTVGNSTAITEERR	78	97	N-Term(Dimethyl)	1	1	YAL008W	FUN14	1	3	1	737.716	2211.13	-1.49596	HCD	4.50532	250	31.0757	7750	qExPlus02_00984.raw	30.3	36	29	8.29152e+06	0	3.566e-07	7.04665e+06	1.135e+06	7.04665e+06	1.135e+06	7.04665e+06	1.135e+06	0.16107
qe	High	vGNSTAITEERR	86	97	N-Term(Dimethyl)	1	1	YAL008W	FUN14	1	2	1	680.86	1360.71	-3.56925	HCD	0	250	12.5943	3037	qExPlus02_00984.raw	33.19	36	29	1.62204e+06	0.0008655	0.02803	1.03358e+06	9102.34	1.03358e+06	9102.34	1.03358e+06	9102.34	0.00880663
qe	High	kFPLFLR	9	15	N-Term(Dimethyl:2H(6)); K1(Dimethyl:2H(6))	1	1	YHR059W	FYV4	1	2	3	494.858	988.71	-0.0367904	HCD	0	74.1986	41.9399	10678	qExPlus02_00984.raw	16.7	28	21	3.08973e+06	0.005154	0.1691	9102.34	1.69607e+06	9102.34	1.69607e+06
qe	Medium	kFPLFLR	9	15	N-Term(Dimethyl:2H(6)); K1(Dimethyl:2H(6))	1	1	YHR059W	FYV4	1	2	2	494.858	988.709	-0.468915	HCD	7.86145	173.062	42.2065	10742	qExPlus02_00984.raw	9.49	28	21	4.07604e+06	0.01742	0.2566	9102.34	1828550	18204.7	3.52462e+06	18204.7	3.52462e+06	193.611
qe	High	sSTIPkPSDQVPDVDAFLNkIGR	28	50	N-Term(Dimethyl); K6(Dimethyl); K20(Dimethyl)	1	1	YHR059W	FYV4	1	3	1	856.805	2568.4	-1.28567	HCD	0	226.199	56.5431	14217	qExPlus02_00984.raw	50.41	34	27	1.13457e+07	0	9.863e-08	3.2983e+06	9102.34	3.2983e+06	9102.34	3.2983e+06	9102.34	0.00275971
qe	High	sSQLSQWNYNNNR	84	96	N-Term(Dimethyl)	1	1	YBR179C	FZO1	0	2	1	819.885	1638.76	0.65906	HCD	0	250	28.7698	7681	qExPlus02_00983.raw	97.59	32	25	2.7624e+07	0	3.895e-08	2.7624e+07	2.77837e+07	2.7624e+07	2.77837e+07	2.7624e+07	2.77837e+07	1.00578
qe	Medium	sIIkkIVF	2	9	N-Term(Dimethyl:2H(6)); K4(Dimethyl:2H(6)); K5(Dimethyl:2H(6))	1	1	YDR019C	GCV1	2	2	1	525.421	1049.83	-1.12193	HCD	10.2738	87.2176	36.8932	9389	qExPlus02_00984.raw	5.08	22	15	1.25004e+07	0.04554	0.4017	9102.34	5276039	9102.34	5276039
qe	Medium	sIIkkIVF	2	9	N-Term(Dimethyl:2H(6)); K4(Dimethyl:2H(6)); K5(Dimethyl:2H(6))	1	1	YDR019C	GCV1	2	2	1	525.421	1049.83	-0.773106	HCD	9.40039	42.8278	37.1898	9463	qExPlus02_00984.raw	9.26	22	15	9.49944e+06	0.01877	0.2608	9102.34	5.78021e+06	18204.7	1.10562e+07	18204.7	1.10562e+07	607.33
qe	High	kTAATDITSTQYSR	38	51	N-Term(Dimethyl); K1(Dimethyl)	1	1	YMR189W	GCV2	1	2	1	799.922	1598.84	-0.763084	HCD	0	222.924	17.7666	4332	qExPlus02_00984.raw	60.04	35	28	1.81951e+08	0	2.1e-05	1.81951e+08	231805427	1.81951e+08	231805427
qe	High	kTAATDITSTQYSR	38	51	N-Term(Dimethyl:2H(6)); K1(Dimethyl:2H(6))	1	1	YMR189W	GCV2	1	2	1	805.96	1610.91	-0.684453	HCD	15.8531	75.9422	17.9377	4375	qExPlus02_00984.raw	53.87	35	28	5.16868e+06	0	9.198e-06	6.87383e+07	5.16868e+06	2.50689e+08	2.36974e+08
qe	High	kTAATDITSTQYSR	38	51	N-Term(Dimethyl:2H(6)); K1(Dimethyl:2H(6))	1	1	YMR189W	GCV2	1	2	1	805.96	1610.91	-1.06334	HCD	0	250	18.4424	4494	qExPlus02_00984.raw	42.34	35	28	944805	0	0.007833	721396	925726	2.51411e+08	2.379e+08	2.51411e+08	2.379e+08	0.946259
qe	High	kTAATDITSTQYSR	38	51	N-Term(Dimethyl); K1(Dimethyl)	1	1	YMR189W	GCV2	1	3	1	533.617	1598.84	-1.80221	HCD	17.7706	250	17.792	4338	qExPlus02_00984.raw	35.33	36	29	2.34176e+07	0	0.01079	2.34176e+07	5.36829e+06	2.34176e+07	5.36829e+06	2.34176e+07	5.36829e+06	0.229242
Fusion_Acetyl	High	nSSGNALNkNkLPFLYSSQGPQAVR	22	46	N-Term(Acetyl); K9(Dimethyl:2H(6)); K11(Dimethyl:2H(6))	1	1	YAL044C	GCV3	2	4	1	700.892	2800.55	-1.27704	ETD	22.5354	50	10.9769	6329	Fusion002161.raw	22.03	34	27	3.62974e+06	0	0.1289	2297.14	685130	2297.14	685130	2297.14	685130	298.254
qe	High	sSGNALNkNkLPFLYSSQGPQAVR	23	46	N-Term(Dimethyl:2H(6)); K8(Dimethyl:2H(6)); K10(Dimethyl:2H(6))	1	1	YAL044C	GCV3	2	3	1	893.526	2678.56	-0.2464	HCD	0	250	37.9444	9652	qExPlus02_00984.raw	36.57	33	26	14333238	0	4.687e-08	2.04813e+07	14333238	2.04813e+07	14333238
qe	High	sSGNALNkNkLPFLYSSQGPQAVR	23	46	N-Term(Dimethyl); K8(Dimethyl); K10(Dimethyl)	1	1	YAL044C	GCV3	2	3	1	887.492	2660.46	3.47107	HCD	0	250	38.207	9713	qExPlus02_00984.raw	42.77	34	27	1.73317e+07	0	1.378e-09	3.78989e+06		2.42712e+07	14333238
qe	High	sSGNALNkNkLPFLYSSQGPQAVR	23	46	N-Term(Dimethyl); K8(Dimethyl); K10(Dimethyl)	1	1	YAL044C	GCV3	2	3	1	887.485	2660.44	-3.96202	HCD	0	250	38.6925	9831	qExPlus02_00984.raw	45.49	35	28	8.1422e+06	0	1.684e-10	2.04364e+06	9102.34	2.63149e+07	1.43423e+07	2.63149e+07	1.43423e+07	0.545028
qe	High	sSGNALNkNkLPFLYSSQGPQAVR	23	46	N-Term(Dimethyl); K8(Dimethyl); K10(Dimethyl)	1	1	YAL044C	GCV3	2	4	1	665.872	2660.47	5.76018	HCD	7.11583	250	38.1304	9695	qExPlus02_00984.raw	28.39	34	27	84402.3	0	0.003115		9102.34	0	9102.34	0	9102.34
qe	High	dFPGkDLQR	34	42	N-Term(Dimethyl:2H(6)); K5(Dimethyl:2H(6))	1	1	YDL215C	GDH2	1	2	1	572.349	1143.69	-0.0352302	HCD	8.07639	250	25.0677	6189	qExPlus02_00984.raw	25.89	35	28	4.23422e+06	0	0.06517	2.11093e+06	4.23422e+06	2.11093e+06	4.23422e+06	2.11093e+06	4.23422e+06	2.00586
qe_Acetyl	High	mNISGTLNTLR	1	11	N-Term(Acetyl); M1(Oxidation)	1	1	YHR100C	GEP4	0	2	1	639.329	1277.65	-1.55314	HCD	15.203	250	52.7165	13762	qExPlus02_00982.raw	50.82	35	28	5.31482e+07	0	0.01477			0	0
qe_Acetyl	High	mNISGTLNTLR	1	11	N-Term(Acetyl)	1	1	YHR100C	GEP4	0	2	1	631.33	1261.65	-2.89413	HCD	3.17616	250	65.2712	16893	qExPlus02_00982.raw	64.04	36	29	5.54853e+07	0	0.009101			0	0
qe_Acetyl	High	mNISGTLNTLR	1	11	N-Term(Acetyl); M1(Oxidation)	1	1	YHR100C	GEP4	0	2	1	639.329	1277.65	-1.55314	HCD	57.6919	250	65.5057	16950	qExPlus02_00982.raw	50.09	37	30	4.55115e+06	0	0.01205			0	0
qe_Acetyl	High	mNISGTLNTLR	1	11	N-Term(Acetyl)	1	1	YHR100C	GEP4	0	2	1	631.33	1261.65	-2.99088	HCD	18.921	250	65.8133	17025	qExPlus02_00982.raw	10.65	35	28	494737	0.001447	0.06043			0	0	0	0
qe_Acetyl	High	mIkAVAGNLLVkR	22	34	N-Term(Acetyl); M1(Oxidation); K3(Dimethyl:2H(6)); K12(Dimethyl:2H(6))	1	1	YGL057C	GEP7	2	3	1	513.679	1539.02	1.35946	HCD	45.3305	250	52.6459	13282	qExPlus02_00984.raw	9.84	26	19	1.9782e+06	0.002723	0.0807	19568.4	863252	19568.4	863252	19568.4	863252	44.1147
Fusion_Acetyl	High	mIkAVAGNLLVkR	22	34	N-Term(Acetyl); M1(Oxidation); K3(Dimethyl:2H(6)); K12(Dimethyl:2H(6))	1	1	YGL057C	GEP7	2	3	1	513.679	1539.02	1.12151	ETD	22.268	50	20.8947	11864	Fusion002161.raw	60.79	26	19	4.1414e+06	0	0.002097	986901	4.1414e+06	986901	4.1414e+06
Fusion_Acetyl	High	mIkAVAGNLLVkR	22	34	N-Term(Acetyl); K3(Dimethyl:2H(6)); K12(Dimethyl:2H(6))	1	1	YGL057C	GEP7	2	3	1	508.346	1523.02	-0.963136	ETD	33.4388	50	20.7819	11805	Fusion002161.raw	69.31	26	19	5.64444e+07	0	1.066e-05	2297.14	25081260	989198	2.92227e+07
Fusion_Acetyl	High	mIkAVAGNLLVkR	22	34	N-Term(Acetyl); M1(Oxidation); K3(Dimethyl:2H(6)); K12(Dimethyl:2H(6))	1	1	YGL057C	GEP7	2	3	1	513.678	1539.02	-1.49595	ETD	35.4802	50	8.36297	4843	Fusion002161.raw	55.85	27	20	5.47561e+07	0	0.002639	2297.14	23343096	991496	5.25658e+07	991496	5.25658e+07	53.0166
qe	High	mkFLLQQIR	1	9	N-Term(Dimethyl:2H(6)); M1(Oxidation); K2(Dimethyl:2H(6))	1	1	YOR040W	GLO4	1	2	1	630.915	1260.82	-2.32248	HCD	10.7295	250	40.4543	10293	qExPlus02_00984.raw	14.63	32	25	2.42821e+06	0.001025	0.07025	9102.34	1.50496e+06	9102.34	1.50496e+06
qe	High	mkFLLQQIR	1	9	N-Term(Dimethyl:2H(6)); K2(Dimethyl:2H(6))	1	1	YOR040W	GLO4	1	2	1	622.918	1244.83	-1.53413	HCD	3.02737	57.574	40.4817	10301	qExPlus02_00984.raw	40.77	32	25	4.39452e+07	0	0.002628	9102.34	23977198	18204.7	2.54822e+07	18204.7	2.54822e+07	1399.76
Fusion	High	mkFLLQQIR	1	9	N-Term(Dimethyl:2H(6)); K2(Dimethyl:2H(6))	1	1	YOR040W	GLO4	1	2	1	622.919	1244.83	0.721292	HCD	4.24892	29.5329	6.97155	4037	Fusion002161.raw	38.48	22	15	2.54015e+07	0	0.1041	3532.53	13966017	3532.53	13966017	3532.53	13966017	3953.54
Fusion	High	mkFLLQQIR	1	9	N-Term(Dimethyl:2H(6)); K2(Dimethyl:2H(6))	1	1	YOR040W	GLO4	1	3	1	415.615	1244.83	-0.245613	ETD	1.58697	50	6.85527	3971	Fusion002161.raw	55.22	22	15	2.01098e+08	0	0.04994	3532.53	102090176	3532.53	102090176	3532.53	102090176	28900
qe_Acetyl	High	mLSATkQTFR	1	10	N-Term(Acetyl); K6(Dimethyl:2H(6))	1	1	YPL091W	GLR1	1	2	1	629.857	1258.71	-1.81061	HCD	0	250	38.5715	10456	qExPlus02_00983.raw	55.73	34	27	3.31948e+07	0	0.0006816	258744	27094003	258744	27094003
qe_Acetyl	High	mLSATkQTFR	1	10	N-Term(Acetyl); M1(Oxidation); K6(Dimethyl:2H(6))	1	1	YPL091W	GLR1	1	2	1	637.855	1274.7	-1.8208	HCD	0	235.292	38.3632	10406	qExPlus02_00983.raw	46.3	34	27	1.86172e+07	0	0.001813	19568.4	9798540	278312	36892543
qe_Acetyl	High	mLSATkQTFR	1	10	N-Term(Acetyl); M1(Oxidation); K6(Dimethyl:2H(6))	1	1	YPL091W	GLR1	1	2	1	637.855	1274.7	-1.24622	HCD	0	117.724	28.1137	7453	qExPlus02_00983.raw	42.21	34	27	17453878	0	0.002656			278312	36892543	278312	36892543	132.558
qe	High	aDVITIPESTTR	27	38	N-Term(Dimethyl)	1	1	YNL274C	GOR1	0	2	1	665.863	1330.72	-2.59262	HCD	37.8426	250	40.7218	10976	qExPlus02_00983.raw	45.52	36	29	1.34884e+06	0	0.0007345	1.04665e+06		1.04665e+06	0	1.04665e+06	0
qe	Medium	ykILPSR	26	32	N-Term(Dimethyl:2H(6)); K2(Dimethyl:2H(6))	1	1	YOL059W	GPD2	1	2	1	472.837	944.666	-2.27017	HCD	35.8069	250	19.4883	4749	qExPlus02_00984.raw	9	32	25	1.5776e+06	0.02313	0.2822	9102.34	1.00566e+06	9102.34	1.00566e+06	9102.34	1.00566e+06	110.483
qe	High	mFLPkFNPIR	1	10	N-Term(Dimethyl:2H(6)); M1(Oxidation); K5(Dimethyl:2H(6))	1	1	YPL059W	GRX5	1	2	1	673.921	1346.84	-4.00546	HCD	12.4585	125.436	41.6118	10595	qExPlus02_00984.raw	2.64	34	27	1.61449e+07	0.00358	0.1284	9102.34	14234160	9102.34	14234160
qe	High	mFLPkFNPIR	1	10	N-Term(Dimethyl:2H(6)); M1(Oxidation); K5(Dimethyl:2H(6))	1	1	YPL059W	GRX5	1	2	1	673.922	1346.84	-2.2834	HCD	48.3831	250	41.8873	10664	qExPlus02_00984.raw	13.84	34	27	9.92522e+06	0	0.05772	9102.34	4109892	18204.7	18344052
qe	High	mFLPkFNPIR	1	10	N-Term(Dimethyl:2H(6)); M1(Oxidation); K5(Dimethyl:2H(6))	1	1	YPL059W	GRX5	1	2	1	673.923	1346.84	-1.92086	HCD	17.7715	250	43.158	10965	qExPlus02_00984.raw	19.88	34	27	2.29125e+06	0	0.0397	9102.34	1.20359e+06	27307	1.95476e+07
qe	High	mFLPkFNPIR	1	10	N-Term(Dimethyl:2H(6)); M1(Oxidation); K5(Dimethyl:2H(6))	1	1	YPL059W	GRX5	1	2	1	673.925	1346.84	2.24833	HCD	78.2619	250	47.0979	11903	qExPlus02_00984.raw	24.02	35	28	502071	0.004334	0.1547			27307	1.95476e+07
qe	High	mFLPkFNPIR	1	10	N-Term(Dimethyl:2H(6)); K5(Dimethyl:2H(6))	1	1	YPL059W	GRX5	1	2	1	665.924	1330.84	-3.56345	HCD	10.0364	121.703	47.3011	11952	qExPlus02_00984.raw	37.2	34	27	3.99585e+07	0	0.0008043	9102.34	18863102	36409.4	3.84107e+07
qe	High	mFLPkFNPIR	1	10	N-Term(Dimethyl:2H(6)); M1(Oxidation); K5(Dimethyl:2H(6))	1	1	YPL059W	GRX5	1	2	1	673.921	1346.83	-4.368	HCD	15.7877	219.04	47.3692	11968	qExPlus02_00984.raw	22.14	35	28	3.80383e+06	0.004334	0.1466	9102.34	1.22767e+06	45511.7	3.96384e+07
qe	High	mFLPkFNPIR	1	10	N-Term(Dimethyl:2H(6)); K5(Dimethyl:2H(6))	1	1	YPL059W	GRX5	1	2	1	665.924	1330.84	-3.28828	HCD	11.0701	250	47.5626	12014	qExPlus02_00984.raw	36.98	34	27	6.62306e+06	0	0.002037	9102.34	2.72636e+06	54614	4.23648e+07
qe	High	mFLPkFNPIR	1	10	N-Term(Dimethyl:2H(6)); M1(Oxidation); K5(Dimethyl:2H(6))	1	1	YPL059W	GRX5	1	2	1	673.924	1346.84	-0.198806	HCD	20.0662	250	47.6638	12039	qExPlus02_00984.raw	12.53	34	27	985107	0	0.03071	9102.34	529880	63716.4	4.28946e+07	63716.4	4.28946e+07	673.212
qe_Acetyl	High	mFLPkFNPIR	1	10	N-Term(Acetyl); K5(Dimethyl:2H(6))	1	1	YPL059W	GRX5	1	2	1	669.897	1338.79	-1.13699	HCD	7.2524	173.987	68.9168	17844	qExPlus02_00983.raw	27.19	34	27	8.15794e+07	0	0.01156	19568.4	35798196	19568.4	35798196
qe_Acetyl	High	mFLPkFNPIR	1	10	N-Term(Acetyl); M1(Oxidation); K5(Dimethyl:2H(6))	1	1	YPL059W	GRX5	1	2	1	677.893	1354.78	-2.32588	HCD	20.7215	250	68.8758	17834	qExPlus02_00983.raw	15.58	34	27	14341328	0.002723	0.07354	19568.4	5796038	39136.7	41594234
qe_Acetyl	Medium	mFLPkFNPIR	1	10	N-Term(Acetyl); M1(Oxidation); K5(Dimethyl:2H(6))	1	1	YPL059W	GRX5	1	2	1	677.893	1354.78	-1.96546	HCD	27.0764	250	60.4436	15768	qExPlus02_00983.raw	17.37	34	27	448972	0.03095	0.2056			39136.7	41594234
qe_Acetyl	Medium	mFLPkFNPIR	1	10	N-Term(Acetyl); K5(Dimethyl:2H(6))	1	1	YPL059W	GRX5	1	2	1	669.895	1338.78	-3.14295	HCD	24.316	250	69.2885	17931	qExPlus02_00983.raw	9.19	34	27	970234	0.02106	0.1536	19568.4	408610	58705.1	4.20028e+07	58705.1	4.20028e+07	715.489
qe	High	mFLPkFNPIR	1	10	N-Term(Dimethyl:2H(6)); K5(Dimethyl:2H(6))	1	1	YPL059W	GRX5	1	3	1	444.287	1330.85	-0.454947	HCD	18.9828	206.861	47.131	11911	qExPlus02_00984.raw	12.53	34	27	2.92188e+06	0.006652	0.2014	9102.34	1.45351e+06	9102.34	1.45351e+06	9102.34	1.45351e+06	159.686
Fusion	Medium	mFLPkFNPIR	1	10	N-Term(Dimethyl:2H(6)); K5(Dimethyl:2H(6))	1	1	YPL059W	GRX5	1	3	1	444.287	1330.85	-0.386154	HCD	4.56145	30.8379	15.2633	8740	Fusion002161.raw	11.24	23	16	5.26078e+08	0.03814	0.3287		248041856	0	248041856
Fusion	Medium	mFLPkFNPIR	1	10	N-Term(Dimethyl:2H(6)); M1(Oxidation); K5(Dimethyl:2H(6))	1	1	YPL059W	GRX5	1	3	1	449.618	1346.84	-0.0501792	HCD	5.68848	31.078	7.66079	4438	Fusion002161.raw	9.72	25	18	119239102	0.04396	0.3688	3532.53	56348936	3532.53	304390792
Fusion	High	mFLPkFNPIR	1	10	N-Term(Dimethyl:2H(6)); M1(Oxidation); K5(Dimethyl:2H(6))	1	1	YPL059W	GRX5	1	3	1	449.62	1346.85	3.41659	HCD	0	79.3546	14.3088	8205	Fusion002161.raw	29.39	25	18	1.88464e+06	0	0.2076	3532.53	874273	7065.07	3.05265e+08	7065.07	3.05265e+08	43207.7
Fusion	Medium	fLPkFNPIR	2	10	N-Term(Dimethyl:2H(6)); K4(Dimethyl:2H(6))	1	1	YPL059W	GRX5	1	3	1	400.607	1199.81	0.528003	HCD	6.12741	28.8729	5.94148	3442	Fusion002161.raw	18.16	21	14	4.60111e+06	0.02617	0.2463	3532.53	2.51771e+06	3532.53	2.51771e+06	3532.53	2.51771e+06	712.72
qe_Acetyl	Medium	mEIYIR	1	6	N-Term(Acetyl); M1(Oxidation)	1	1	YML048W	GSF2	0	1	1	882.437	882.437	-2.28398	HCD	0	250	45.1289	11776	qExPlus02_00982.raw	23.25	32	25	2.78544e+07	0.02654	0.1765			0	0	0	0
qe_Acetyl	Medium	mEIYIR	1	6	N-Term(Acetyl); M1(Oxidation)	1	1	YML048W	GSF2	0	2	1	441.722	882.437	-2.64505	HCD	44.5151	250	44.8766	11711	qExPlus02_00982.raw	26.2	33	26	8.54016e+06	0.02819	0.2466			0	0	0	0
qe_Acetyl	High	mFSVTR	1	6	N-Term(Acetyl)	1	1	YIL155C	GUT2	0	1	1	782.384	782.384	-3.19934	HCD	0	218.612	52.865	13800	qExPlus02_00982.raw	23.03	32	25	3.90438e+08	0.006155	0.1066			0	0
qe_Acetyl	Medium	mFSVTR	1	6	N-Term(Acetyl); M1(Oxidation)	1	1	YIL155C	GUT2	0	1	1	798.38	798.38	-2.19395	HCD	0	250	37.4883	9590	qExPlus02_00982.raw	18.11	31	24	5.68434e+07	0.01654	0.1879			0	0
qe_Acetyl	Medium	mFSVTR	1	6	N-Term(Acetyl); M1(Oxidation)	1	1	YIL155C	GUT2	0	1	1	798.38	798.38	-2.19395	HCD	0	33.6129	37.7488	9672	qExPlus02_00982.raw	20.79	31	24	8.84472e+07	0.0442	0.3216			0	0
qe_Acetyl	Medium	mFSVTR	1	6	N-Term(Acetyl); M1(Oxidation)	1	1	YIL155C	GUT2	0	1	1	798.38	798.38	-1.58237	HCD	0	64.4158	53.1758	13882	qExPlus02_00982.raw	20.89	32	25	9.06085e+07	0.01654	0.1866			0	0	0	0
qe_Acetyl	Medium	mFSVTR	1	6	N-Term(Acetyl); M1(Oxidation)	1	1	YIL155C	GUT2	0	2	1	399.694	798.38	-2.0579	HCD	11.3437	250	37.493	9591	qExPlus02_00982.raw	31.34	31	24	5.73402e+07	0.04505	0.2779			0	0
qe_Acetyl	Medium	mFSVTR	1	6	N-Term(Acetyl)	1	1	YIL155C	GUT2	0	2	1	391.696	782.385	-2.59243	HCD	37.5381	43.2132	52.9533	13824	qExPlus02_00982.raw	29.95	32	25	5.81507e+07	0.03815	0.2393			0	0	0	0
qe	Medium	tGTLYWMTSQGDRPLVHNDPSYMVQFPTAAPPQVSR	20	55	N-Term(Dimethyl)	1	1	YIL155C	GUT2	0	3	1	1359.34	4076.02	9.88986	HCD	43.0587	250	57.6377	15094	qExPlus02_00983.raw	17.64	34	27	25043069	0.0131	0.1979	25043069	24316320	25043069	24316320
qe	Medium	tGTLYWmTSQGDRPLVHNDPSYmVQFPTAAPPQVSR	20	55	N-Term(Dimethyl:2H(6)); M7(Oxidation); M23(Oxidation)	1	1	YIL155C	GUT2	0	3	1	1372	4113.99	-5.28099	HCD	0	250	57.7271	15116	qExPlus02_00983.raw	19.4	31	24	3.0804e+06	0.01602	0.2378	9102.34	2330770	2.50522e+07	26647090	2.50522e+07	26647090	1.06366
qe	High	dPSYMVQFPTAAPPQVSR	38	55	N-Term(Dimethyl:2H(6))	1	1	YIL155C	GUT2	0	2	1	1013.02	2025.03	-4.55665	HCD	0	250	63.7351	16515	qExPlus02_00982.raw	97.84	34	27	948630	0	1.903e-07		361182	0	361182
qe	High	dPSYmVQFPTAAPPQVSR	38	55	N-Term(Dimethyl:2H(6)); M5(Oxidation)	1	1	YIL155C	GUT2	0	2	1	1021.02	2041.03	-1.19225	HCD	5.22153	8.21802	57.7382	15119	qExPlus02_00983.raw	108.23	34	27	1.04543e+09	0	8.746e-07	569003620	1030929032	569003620	1.03129e+09
qe	High	dPSYmVQFPTAAPPQVSR	38	55	N-Term(Dimethyl); M5(Oxidation)	1	1	YIL155C	GUT2	0	2	1	1018	2035	0.274997	HCD	0	250	58.3589	15275	qExPlus02_00983.raw	83.68	35	28	2.16397e+06	0	1.202e-05	1159359	9102.34	570162979	1.0313e+09
qe	High	dPSYmVQFPTAAPPQVSR	38	55	N-Term(Dimethyl); M5(Oxidation)	1	1	YIL155C	GUT2	0	2	1	1018	2034.99	-1.46458	HCD	6.68264	250	58.9797	15429	qExPlus02_00983.raw	84.38	35	28	18481982	0	2.776e-09	6.26476e+06	9102.34	5.76428e+08	1.03131e+09
qe	High	dPSYmVQFPTAAPPQVSR	38	55	N-Term(Dimethyl); M5(Oxidation)	1	1	YIL155C	GUT2	0	2	1	1018	2034.99	-1.28463	HCD	0	250	60.0055	15667	qExPlus02_00983.raw	72.39	35	28	1.33367e+06	0	3.852e-07			5.76428e+08	1.03131e+09
qe	High	dPSYmVQFPTAAPPQVSR	38	55	N-Term(Dimethyl); M5(Oxidation)	1	1	YIL155C	GUT2	0	2	1	1018	2035	1.17478	HCD	0	250	60.274	15729	qExPlus02_00983.raw	83.82	35	28	1.84434e+06	0	1.912e-08	692519	9102.34	5.7712e+08	1.03132e+09
qe	High	dPSYmVQFPTAAPPQVSR	38	55	N-Term(Dimethyl); M5(Oxidation)	1	1	YIL155C	GUT2	0	2	1	1018	2034.99	-0.744757	HCD	0	250	61.1499	15942	qExPlus02_00983.raw	76.99	35	28	1.67717e+06	0	8.676e-08	849749		5.7797e+08	1.03132e+09
qe	High	dPSYmVQFPTAAPPQVSR	38	55	N-Term(Dimethyl); M5(Oxidation)	1	1	YIL155C	GUT2	0	2	1	1018	2034.99	-2.2444	HCD	0	250	62.6077	16282	qExPlus02_00983.raw	93.94	35	28	4.08013e+06	0	1.396e-07	1.29375e+06		5.79264e+08	1.03132e+09
qe	High	dPSYmVQFPTAAPPQVSR	38	55	N-Term(Dimethyl); M5(Oxidation)	1	1	YIL155C	GUT2	0	2	1	1018	2034.99	-2.60431	HCD	26.5282	250	63.0626	16398	qExPlus02_00983.raw	72.14	35	28	1.83605e+06	0	3.619e-07	1.83605e+06	4253615	5.811e+08	1.03557e+09
qe	High	dPSYmVQFPTAAPPQVSR	38	55	N-Term(Dimethyl); M5(Oxidation)	1	1	YIL155C	GUT2	0	2	1	1018	2034.98	-5.18369	HCD	72.1792	250	63.3323	16462	qExPlus02_00983.raw	60.33	34	27	3.44459e+06	0	4.477e-07	3.03812e+06	7.49854e+06	5.84138e+08	1.04307e+09
qe	High	dPSYMVQFPTAAPPQVSR	38	55	N-Term(Dimethyl:2H(6))	1	1	YIL155C	GUT2	0	2	1	1013.02	2025.03	-3.10992	HCD	0	9.77834	64.0107	16664	qExPlus02_00983.raw	88.73	34	27	1.42161e+09	0	7.446e-06	922504732	1.42161e+09	1.50664e+09	2.46468e+09
qe	High	dPSYMVQFPTAAPPQVSR	38	55	N-Term(Dimethyl)	1	1	YIL155C	GUT2	0	2	1	1010	2019	-1.1531	HCD	0	250	64.6762	16838	qExPlus02_00983.raw	76.53	35	28	1.9489e+06	0	2.598e-07	1.14489e+06	9102.34	1.50779e+09	2.46469e+09	1.50779e+09	2.46469e+09	1.63464
qe	High	dPSYMVQFPTAAPPQVSR	38	55	N-Term(Dimethyl:2H(6))	1	1	YIL155C	GUT2	0	3	1	675.68	2025.02	-6.79367	HCD	70.2873	250	63.6995	16507	qExPlus02_00982.raw	20.89	34	27	907345	0.00358	0.1257	9102.34	360991	9102.34	360991
qe	High	dPSYmVQFPTAAPPQVSR	38	55	N-Term(Dimethyl); M5(Oxidation)	1	1	YIL155C	GUT2	0	3	1	679.003	2034.99	-0.631394	HCD	0	23.1823	57.8499	15151	qExPlus02_00983.raw	43.62	35	28	2.32552e+08	0	0.001137	2.32552e+08	3.79865e+08	2.32561e+08	3.80226e+08
qe	High	dPSYmVQFPTAAPPQVSR	38	55	N-Term(Dimethyl); M5(Oxidation)	1	1	YIL155C	GUT2	0	3	1	679.003	2034.99	-0.361459	HCD	28.3472	250	58.3237	15267	qExPlus02_00983.raw	60.84	35	28	419259	0	2.324e-06			2.32561e+08	3.80226e+08
qe	High	dPSYmVQFPTAAPPQVSR	38	55	N-Term(Dimethyl); M5(Oxidation)	1	1	YIL155C	GUT2	0	3	1	679.003	2034.99	-0.721372	HCD	64.18	108.515	58.785	15383	qExPlus02_00983.raw	26.32	35	28	4163375	0	0.002098	2.94036e+06	5170903	2.35502e+08	3.85397e+08
qe	High	dPSYmVQFPTAAPPQVSR	38	55	N-Term(Dimethyl:2H(6)); M5(Oxidation)	1	1	YIL155C	GUT2	0	3	1	681.015	2041.03	-1.85672	HCD	36.7926	250	59.1296	15465	qExPlus02_00983.raw	41.16	33	26	1.27705e+07	0	0.0007888		4.32177e+06	2.35502e+08	3.89719e+08
qe	High	dPSYmVQFPTAAPPQVSR	38	55	N-Term(Dimethyl); M5(Oxidation)	1	1	YIL155C	GUT2	0	3	1	679.003	2034.99	-0.27148	HCD	15.3198	250	59.4548	15541	qExPlus02_00983.raw	50.33	35	28	2.80427e+06	0	4.942e-06	1240354	9102.34	2.36742e+08	3.89728e+08
qe	High	dPSYmVQFPTAAPPQVSR	38	55	N-Term(Dimethyl:2H(6)); M5(Oxidation)	1	1	YIL155C	GUT2	0	3	1	681.017	2041.04	2.09061	HCD	95.5196	250	60.0637	15681	qExPlus02_00983.raw	30.31	34	27	523172	0	0.006663	771665		2.37514e+08	3.89728e+08
qe	High	dPSYmVQFPTAAPPQVSR	38	55	N-Term(Dimethyl:2H(6)); M5(Oxidation)	1	1	YIL155C	GUT2	0	3	1	681.016	2041.03	-0.421329	HCD	42.5035	250	60.3293	15742	qExPlus02_00983.raw	42.23	34	27	3.25239e+06	0	0.001133	1511083	1.86395e+06	2.39025e+08	3.91592e+08
qe	High	dPSYmVQFPTAAPPQVSR	38	55	N-Term(Dimethyl:2H(6)); M5(Oxidation)	1	1	YIL155C	GUT2	0	3	1	681.014	2041.03	-2.75384	HCD	50.1168	250	61.0784	15925	qExPlus02_00983.raw	35.68	34	27	337523	0	0.009971	238263		2.39263e+08	3.91592e+08
qe	High	dPSYmVQFPTAAPPQVSR	38	55	N-Term(Dimethyl); M5(Oxidation)	1	1	YIL155C	GUT2	0	3	1	679.002	2034.99	-1.71113	HCD	9.65471	250	62.6125	16283	qExPlus02_00983.raw	55.57	35	28	3.37084e+06	0	0.000169	3.37084e+06	3.06932e+06	2.42634e+08	3.94662e+08	2.42634e+08	3.94662e+08	1.62657
qe	High	dPSYmVQFPTAAPPQVSRR	38	56	N-Term(Dimethyl); M5(Oxidation)	1	1	YIL155C	GUT2	1	2	1	1096.05	2191.09	-2.54696	HCD	0	250	46.9673	12468	qExPlus02_00983.raw	23.53	36	29	1.73316e+06	0.007065	0.1064	1.73316e+06	4.29838e+06	1.73316e+06	4.29838e+06
qe	High	dPSYMVQFPTAAPPQVSRR	38	56	N-Term(Dimethyl)	1	1	YIL155C	GUT2	1	2	1	1088.05	2175.09	-3.33211	HCD	0	139.101	52.2023	13779	qExPlus02_00983.raw	26.2	36	29	1.07671e+06	0.0008655	0.01308	364513		2.09767e+06	4.29838e+06	2.09767e+06	4.29838e+06	2.04912
qe	High	dPSYmVQFPTAAPPQVSRR	38	56	N-Term(Dimethyl); M5(Oxidation)	1	1	YIL155C	GUT2	1	3	1	731.037	2191.1	-0.436043	HCD	0	169.156	46.8975	12452	qExPlus02_00983.raw	38.34	36	29	3.29251e+07	0	0.0002243	3.29251e+07	4.41649e+07	3.29251e+07	4.41649e+07
qe	High	dPSYMVQFPTAAPPQVSRR	38	56	N-Term(Dimethyl:2H(6))	1	1	YIL155C	GUT2	1	3	1	727.715	2181.13	-4.30952	HCD	17.9038	250	52.2504	13797	qExPlus02_00983.raw	40.15	34	27	36924020	0	0.0002695	4.75249e+07	36924020	8.045e+07	8.1089e+07
qe	High	dPSYmVQFPTAAPPQVSRR	38	56	N-Term(Dimethyl); M5(Oxidation)	1	1	YIL155C	GUT2	1	3	1	731.035	2191.09	-2.69238	HCD	16.1604	250	52.2692	13801	qExPlus02_00983.raw	46.09	36	29	7.78438e+06	0	8.217e-05	2420030		8.287e+07	8.1089e+07	8.287e+07	8.1089e+07	0.978508
qe	High	sYmVQFPTAAPPQVSR	40	55	N-Term(Dimethyl:2H(6)); M3(Oxidation)	1	1	YIL155C	GUT2	0	2	1	914.979	1828.95	-1.66703	HCD	28.2349	250	49.3323	13059	qExPlus02_00983.raw	74.99	34	27	5.49856e+06	0	0.0001432	2.69572e+06	5.49856e+06	2.69572e+06	5.49856e+06
qe	High	sYMVQFPTAAPPQVSR	40	55	N-Term(Dimethyl)	1	1	YIL155C	GUT2	0	2	1	903.962	1806.92	-1.96687	HCD	9.50325	250	54.2023	14261	qExPlus02_00983.raw	74.32	36	29	9.45201e+06	0	5.561e-05	9.38543e+06	1.57798e+07	1.20811e+07	2.12783e+07
qe	High	sYmVQFPTAAPPQVSR	40	55	N-Term(Dimethyl:2H(6)); M3(Oxidation)	1	1	YIL155C	GUT2	0	2	1	914.985	1828.96	4.74032	HCD	0	250	54.1785	14256	qExPlus02_00983.raw	71.04	34	27	3.26449e+06	0	1.385e-05	2.03662e+06	3.26449e+06	1.41178e+07	2.45428e+07	1.41178e+07	2.45428e+07	1.73843
qe	High	sYMVQFPTAAPPQVSR	40	55	N-Term(Dimethyl:2H(6))	1	1	YIL155C	GUT2	0	3	1	604.99	1812.96	-1.22835	HCD	20.5159	250	54.207	14262	qExPlus02_00983.raw	45.65	35	28	3.88996e+06	0	0.002437	1.76972e+06	3.77841e+06	1.76972e+06	3.77841e+06	1.76972e+06	3.77841e+06	2.13503
qe	High	sYMVQFPTAAPPQVSRR	40	56	N-Term(Dimethyl:2H(6))	1	1	YIL155C	GUT2	1	3	1	657.025	1969.06	-0.0337372	HCD	9.63837	250	44.3933	11260	qExPlus02_00984.raw	14.82	35	28	1.51333e+06	0	0.005051	275670	1.01072e+06	275670	1.01072e+06	275670	1.01072e+06	3.66642
qe	High	aAPPQVSR	48	55	N-Term(Dimethyl)	1	1	YIL155C	GUT2	0	2	1	427.247	853.488	-1.60468	HCD	53.4924	250	13.2279	3205	qExPlus02_00983.raw	29.55	34	27	7.7686e+06	0.005141	0.048	7.7686e+06	4.27006e+06	7.7686e+06	4.27006e+06	7.7686e+06	4.27006e+06	0.549657
qe	High	iIGGGATGTGcALDAATR	72	89	N-Term(Dimethyl); C11(Carbamidomethyl)	1	1	YIL155C	GUT2	0	2	1	845.428	1689.85	-6.15901	HCD	0	250	35.0091	9569	qExPlus02_00983.raw	26.23	35	28	1.40644e+06	0.0008655	0.01269	1.29358e+06	822010	1.29358e+06	822010	1.29358e+06	822010	0.635451
qe	High	rFGNSSAAVSTLNR	8	21	N-Term(Dimethyl:2H(6))	1	1	YDR232W	HEM1	1	2	1	757.42	1513.83	-1.91719	HCD	8.23896	250	20.7279	5068	qExPlus02_00984.raw	54.88	35	28	2.92725e+06	0	9.325e-06	9102.34	2.02339e+06	9102.34	2.02339e+06	9102.34	2.02339e+06	222.294
qe	High	rFGNSSAAVSTLNR	8	21	N-Term(Dimethyl:2H(6))	1	1	YDR232W	HEM1	1	3	1	505.282	1513.83	-2.77276	HCD	6.59748	250	20.7455	5072	qExPlus02_00984.raw	39.7	34	27	4.06247e+06	0	0.02182	9102.34	1.77082e+06	9102.34	1.77082e+06	9102.34	1.77082e+06	194.545
qe	High	gNSSAAVSTLNR	10	21	N-Term(Dimethyl:2H(6))	1	1	YDR232W	HEM1	0	2	1	605.836	1210.66	-1.2128	HCD	8.29957	250	16.6964	4096	qExPlus02_00983.raw	76.1	34	27	2.4175e+06	0	0.0001002	9102.34	1.44276e+06	9102.34	1.44276e+06	9102.34	1.44276e+06	158.504
qe	High	fSVTFNmQNAQkR	24	36	N-Term(Dimethyl:2H(6)); M7(Oxidation); K12(Dimethyl:2H(6))	1	1	YOR176W	HEM15	1	2	1	827.96	1654.91	-0.165354	HCD	0	250	27.7879	6883	qExPlus02_00984.raw	42.91	35	28	3.88758e+06	0	0.001813	9102.34	2.24864e+06	9102.34	2.24864e+06
qe	High	fSVTFNmQNAQkR	24	36	N-Term(Dimethyl:2H(6)); M7(Oxidation); K12(Dimethyl:2H(6))	1	1	YOR176W	HEM15	1	2	1	827.962	1654.92	2.26881	HCD	0	250	36.1349	9180	qExPlus02_00984.raw	36.48	35	28	2.10978e+06	0	0.00674	9102.34	826953	18204.7	3.07559e+06	18204.7	3.07559e+06	168.945
qe	High	fSVTFNmQNAQkR	24	36	N-Term(Dimethyl:2H(6)); M7(Oxidation); K12(Dimethyl:2H(6))	1	1	YOR176W	HEM15	1	3	1	552.307	1654.91	-2.64452	HCD	33.6046	173.61	27.6904	6855	qExPlus02_00984.raw	13.12	35	28	11664515	0	0.002941	9102.34	5.74133e+06	9102.34	5.74133e+06	9102.34	5.74133e+06	630.753
qe	High	sVTFNmQNAQkR	25	36	N-Term(Dimethyl:2H(6)); M6(Oxidation); K11(Dimethyl:2H(6))	1	1	YOR176W	HEM15	1	2	1	754.425	1507.84	-0.712039	HCD	0	250	21.4102	5237	qExPlus02_00984.raw	48.44	35	28	4.23955e+06	0	7.192e-05	9102.34	1.60056e+06	9102.34	1.60056e+06
qe	High	sVTFNMQNAQkR	25	36	N-Term(Dimethyl:2H(6)); K11(Dimethyl:2H(6))	1	1	YOR176W	HEM15	1	2	1	746.427	1491.85	-1.10068	HCD	0	250	21.4215	5240	qExPlus02_00984.raw	58.09	35	28	6.84284e+06	0	0.001132	813713	5833455	822815	7.43402e+06	822815	7.43402e+06	9.03486
qe_Acetyl	High	sNDGSkILNYTPVSkIDEIVEISR	2	25	N-Term(Acetyl); K6(Dimethyl); K15(Dimethyl)	1	1	YMR110C	HFD1	2	3	1	925.829	2775.47	-1.6983	HCD	0	250	67.3016	17464	qExPlus02_00983.raw	58.82	35	28	6.84226e+07	0	0.0001097	6.79747e+07	7.87452e+07	6.79747e+07	7.87452e+07	6.79747e+07	7.87452e+07	1.15845
qe_Acetyl	High	sTLLkSA	2	8	N-Term(Acetyl); K5(Dimethyl:2H(6))	1	1	YOR020C	HSP10	1	2	1	398.257	795.507	-3.43003	HCD	13.0908	244.556	43.5491	11354	qExPlus02_00982.raw	12.63	32	25	9.6002e+06	0.001447	0.04134		7936924	0	7936924	0	7936924
qe_Acetyl	High	sTLLkSAkSIVPLMDR	2	17	N-Term(Acetyl); K5(Dimethyl:2H(6)); K8(Dimethyl:2H(6))	1	1	YOR020C	HSP10	2	2	1	935.085	1869.16	-0.440981	HCD	0	250	43.043	10446	qExPlus02_00989.raw	53.79	30	23	3.84515e+06	0	0.0001454	3.41023e+06	3.71441e+06	3.41023e+06	3.71441e+06
qe_Acetyl	High	sTLLkSAkSIVPLmDR	2	17	N-Term(Acetyl); K5(Dimethyl); K8(Dimethyl); M14(Oxidation)	1	1	YOR020C	HSP10	2	2	1	937.044	1873.08	-1.17687	HCD	0	202.771	42.9385	10416	qExPlus02_00989.raw	58.35	31	24	9777232	0	0.002232	9777232	8.71564e+06	1.31875e+07	1.243e+07
qe_Acetyl	High	sTLLkSAkSIVPLmDR	2	17	N-Term(Acetyl); K5(Dimethyl); K8(Dimethyl); M14(Oxidation)	1	1	YOR020C	HSP10	2	2	1	937.044	1873.08	-1.24204	HCD	0	21.4136	41.985	10175	qExPlus02_00989.raw	55.88	31	24	1.89447e+07	0	0.02372	1.89447e+07	1.64915e+07	3.21322e+07	2.89215e+07
qe_Acetyl	High	sTLLkSAkSIVPLmDR	2	17	N-Term(Acetyl); K5(Dimethyl:2H(6)); K8(Dimethyl:2H(6)); M14(Oxidation)	1	1	YOR020C	HSP10	2	2	1	943.083	1885.16	0.188039	HCD	0	250	41.6669	10089	qExPlus02_00989.raw	49.1	30	23	1.00194e+07	0	9.5e-05	1.08517e+07	1.00194e+07	4.29839e+07	3.89409e+07	4.29839e+07	3.89409e+07	0.905943
qe_Acetyl	High	sTLLkSAkSIVPLMDR	2	17	N-Term(Acetyl); K5(Dimethyl); K8(Dimethyl)	1	1	YOR020C	HSP10	2	3	1	619.701	1857.09	-0.448603	HCD	0	54.8647	42.9847	10433	qExPlus02_00989.raw	44.51	31	24	5.20531e+07	0	0.02087	45686393	3.43465e+07	45686393	3.43465e+07
qe_Acetyl	High	sTLLkSAkSIVPLmDR	2	17	N-Term(Acetyl); K5(Dimethyl); K8(Dimethyl); M14(Oxidation)	1	1	YOR020C	HSP10	2	3	1	625.032	1873.08	-0.793024	HCD	73.073	250	42.8497	10394	qExPlus02_00989.raw	14.37	31	24	1.02284e+08	0	0.05517	1.02284e+08	1.04214e+08	1.4797e+08	1.38561e+08
qe_Acetyl	High	sTLLkSAkSIVPLmDR	2	17	N-Term(Acetyl); K5(Dimethyl:2H(6)); K8(Dimethyl:2H(6)); M14(Oxidation)	1	1	YOR020C	HSP10	2	3	1	629.057	1885.16	-1.30842	HCD	7.66584	20.8638	42.1978	10232	qExPlus02_00989.raw	29.61	30	23	1.4549e+08	0	0.001285	1.46646e+08	1.4549e+08	2.94616e+08	2.84051e+08
qe_Acetyl	High	sTLLkSAkSIVPLmDR	2	17	N-Term(Acetyl); K5(Dimethyl:2H(6)); K8(Dimethyl:2H(6)); M14(Oxidation)	1	1	YOR020C	HSP10	2	3	1	629.057	1885.16	-1.11416	HCD	3.83374	250	41.9316	10160	qExPlus02_00989.raw	28	30	23	314448802	0	0.0006929			2.94616e+08	2.84051e+08
qe_Acetyl	High	sTLLkSAkSIVPLmDR	2	17	N-Term(Acetyl); K5(Dimethyl:2H(6)); K8(Dimethyl:2H(6)); M14(Oxidation)	1	1	YOR020C	HSP10	2	3	1	629.057	1885.16	-1.01703	HCD	8.87323	250	51.3655	13557	qExPlus02_00983.raw	23.34	30	23	1.44931e+07	0	0.0004715	1.13914e+07	1.35695e+07	3.06007e+08	2.9762e+08
qe_Acetyl	High	sTLLkSAkSIVPLMDR	2	17	N-Term(Acetyl); K5(Dimethyl:2H(6)); K8(Dimethyl:2H(6))	1	1	YOR020C	HSP10	2	3	1	623.725	1869.16	-1.65636	HCD	6.9456	250	59.1343	15466	qExPlus02_00983.raw	26.37	30	23	5.97843e+06	0	0.000219	4.74008e+06	5.69333e+06	3.10747e+08	3.03314e+08	3.10747e+08	3.03314e+08	0.976078
Fusion	High	sTLLkSAkSIVPLMDR	2	17	N-Term(Dimethyl); K5(Dimethyl); K8(Dimethyl)	1	1	YOR020C	HSP10	2	3	1	615.04	1843.11	-1.20446	HCD	34.3884	38.5329	8.59238	4976	Fusion002161.raw	18.84	21	14	5.18798e+06	0	0.08836	5.18798e+06	6.75047e+06	5.18798e+06	6.75047e+06	5.18798e+06	6.75047e+06	1.30118
Fusion	High	sTLLkSAkSIVPLMDR	2	17	N-Term(Dimethyl); K5(Dimethyl); K8(Dimethyl)	1	1	YOR020C	HSP10	2	4	1	461.532	1843.11	-1.24487	ETD	29.1278	50	8.58386	4971	Fusion002161.raw	61.36	21	14	9.79293e+06	0	0.01808	3.72369e+06		3.72369e+06	0	3.72369e+06	0
qe	High	tLAEAVAATLGPkGR	43	57	N-Term(Dimethyl:2H(6)); K13(Dimethyl:2H(6))	1	1	YLR259C	HSP60	1	2	1	761.986	1522.96	-4.38765	HCD	65.4189	250	35.762	9081	qExPlus02_00984.raw	60.34	34	27	1.38254e+06	0	1.28e-05	9102.34	586209	9102.34	586209
qe	High	tLAEAVAATLGPkGR	43	57	N-Term(Dimethyl); K13(Dimethyl)	1	1	YLR259C	HSP60	1	2	1	755.952	1510.9	1.55905	HCD	0	250	35.8793	9113	qExPlus02_00984.raw	64.65	33	26	2.64387e+06	0	5.104e-07	2.64387e+06	5.14342e+06	2.65298e+06	5.72963e+06	2.65298e+06	5.72963e+06	2.1597
qe	High	dAGSSATYPmQcSALR	12	27	N-Term(Dimethyl); M10(Oxidation); C12(Carbamidomethyl)	1	1	YEL034W	HYP2	0	2	1	879.89	1758.77	-3.29354	HCD	6.27454	178.575	31.0211	8416	qExPlus02_00983.raw	69.46	29	22	1.57784e+07	0	3.086e-06	6.97982e+06	9102.34	6.97982e+06	9102.34
qe	High	dAGSSATYPMQcSALR	12	27	N-Term(Dimethyl); C12(Carbamidomethyl)	1	1	YEL034W	HYP2	0	2	1	871.894	1742.78	-1.19839	HCD	17.08	250	39.9933	10798	qExPlus02_00983.raw	77.17	30	23	3.5942e+06	0	1.864e-08	1673625		8.65344e+06	9102.34	8.65344e+06	9102.34	0.00105188
qe	High	vSTESPDASAITkPDGIFNYSLLENR	28	53	N-Term(Dimethyl); K13(Dimethyl)	1	1	YJR122W	IBA57	0	3	1	960.832	2880.48	6.40464	HCD	28.9852	250	61.2691	15970	qExPlus02_00983.raw	18.66	35	28	674393	0	5.233e-06		1.36619e+06	0	1.36619e+06	0	1.36619e+06
qe	High	mITmINNkTFNR	1	12	N-Term(Dimethyl:2H(6)); M1(Oxidation); M4(Oxidation); K8(Dimethyl:2H(6))	1	1	YPR006C	ICL2	1	2	1	791.946	1582.88	0.790983	HCD	0	250	21.653	5295	qExPlus02_00984.raw	49.68	35	28	82266.2	0	0.01841			0	0
qe	High	mITmINNkTFNR	1	12	N-Term(Dimethyl:2H(6)); M1(Oxidation); M4(Oxidation); K8(Dimethyl:2H(6))	1	1	YPR006C	ICL2	1	2	1	791.944	1582.88	-2.13954	HCD	6.85246	250	21.9105	5355	qExPlus02_00984.raw	54.67	34	27	2.40398e+06	0	0.001414	9102.34	1.02097e+06	9102.34	1.02097e+06
qe	High	mITmINNkTFNR	1	12	N-Term(Dimethyl:2H(6)); M4(Oxidation); K8(Dimethyl:2H(6))	1	1	YPR006C	ICL2	1	2	1	783.948	1566.89	0.202582	HCD	17.7138	250	25.288	6241	qExPlus02_00984.raw	45.37	35	28	8.11905e+06	0	0.000252	8.97212e+06	6.05928e+06	8.98122e+06	7.08025e+06
qe	High	mITmINNkTFNR	1	12	N-Term(Dimethyl:2H(6)); M1(Oxidation); M4(Oxidation); K8(Dimethyl:2H(6))	1	1	YPR006C	ICL2	1	2	1	791.942	1582.88	-3.6048	HCD	42.3834	250	25.3732	6261	qExPlus02_00984.raw	32.51	34	27	1.11416e+07	0	0.02114	9102.34	6963954	8.99032e+06	1.40442e+07
qe	High	mITMINNkTFNR	1	12	N-Term(Dimethyl:2H(6)); M1(Oxidation); K8(Dimethyl:2H(6))	1	1	YPR006C	ICL2	1	2	1	783.947	1566.89	-0.57648	HCD	15.5159	250	28.4695	7056	qExPlus02_00984.raw	63.95	35	28	3.95518e+06	0	0.0008763	9102.34	1.72393e+06	8.99943e+06	1.57681e+07
qe	High	mITmINNkTFNR	1	12	N-Term(Dimethyl:2H(6)); M1(Oxidation); M4(Oxidation); K8(Dimethyl:2H(6))	1	1	YPR006C	ICL2	1	2	1	791.943	1582.88	-2.37089	HCD	24.748	250	28.4946	7062	qExPlus02_00984.raw	30.69	34	27	1.16933e+06	0	0.01193	9102.34	723510	9.00853e+06	1.64916e+07
qe	High	mITMINNkTFNR	1	12	N-Term(Dimethyl:2H(6)); M1(Oxidation); K8(Dimethyl:2H(6))	1	1	YPR006C	ICL2	1	2	1	783.945	1566.88	-3.45901	HCD	19.3349	15.0007	28.744	7125	qExPlus02_00984.raw	64.35	35	28	48773630	0	0.001055	9102.34	19194882	9.01763e+06	3.56865e+07
qe	High	mITmINNkTFNR	1	12	N-Term(Dimethyl:2H(6)); M1(Oxidation); M4(Oxidation); K8(Dimethyl:2H(6))	1	1	YPR006C	ICL2	1	2	1	791.941	1582.87	-5.30142	HCD	0	250	28.7877	7138	qExPlus02_00984.raw	26.03	35	28	4.8207e+06	0	0.01305	9102.34	3.08962e+06	9.02673e+06	3.87761e+07
qe	High	mITMINNkTFNR	1	12	N-Term(Dimethyl:2H(6)); M1(Oxidation); K8(Dimethyl:2H(6))	1	1	YPR006C	ICL2	1	2	1	783.946	1566.88	-2.42393	HCD		250	29.6127	7357	qExPlus02_00984.raw	43.34	35	28	5.18483e+06	0	0.001504	9102.34	2.38567e+06	9.03583e+06	4.11618e+07
qe	High	mITMINNkTFNR	1	12	N-Term(Dimethyl:2H(6)); M1(Oxidation); K8(Dimethyl:2H(6))	1	1	YPR006C	ICL2	1	2	1	783.944	1566.88	-4.78341	HCD	0	250	31.0956	7756	qExPlus02_00984.raw	35.44	35	28	3.58697e+06	0	0.001907	9102.34	2.453e+06	9.04494e+06	4.36148e+07
qe	High	mITmINNkTFNR	1	12	N-Term(Dimethyl:2H(6)); M1(Oxidation); M4(Oxidation); K8(Dimethyl:2H(6))	1	1	YPR006C	ICL2	1	2	1	791.946	1582.88	0.94522	HCD	41.502	250	32.2313	8061	qExPlus02_00984.raw	40.94	35	28	3.14206e+07	0	0.001807	9102.34	12162768	9.05404e+06	5.57776e+07
qe	High	mITmINNkTFNR	1	12	N-Term(Dimethyl:2H(6)); M4(Oxidation); K8(Dimethyl:2H(6))	1	1	YPR006C	ICL2	1	2	1	783.954	1566.9	7.36995	HCD	5.19701	250	32.2475	8065	qExPlus02_00984.raw	52.72	35	28	1.91898e+07	0	0.007978	9102.34	7.0133e+06	9.06314e+06	6.27909e+07
qe	High	mITMINNkTFNR	1	12	N-Term(Dimethyl:2H(6)); K8(Dimethyl:2H(6))	1	1	YPR006C	ICL2	1	2	1	775.953	1550.9	2.75043	HCD	0	250	32.4886	8126	qExPlus02_00984.raw	61.85	35	28	6.87315e+07	0	0.0002746	9102.34	27642630	9.07224e+06	9.04335e+07
qe	High	mITmINNkTFNR	1	12	N-Term(Dimethyl:2H(6)); M1(Oxidation); M4(Oxidation); K8(Dimethyl:2H(6))	1	1	YPR006C	ICL2	1	2	1	791.944	1582.88	-1.29123	HCD	11.187	250	32.4933	8127	qExPlus02_00984.raw	69.9	34	27	1.43556e+07	0	0.001377	9102.34	6.27588e+06	9.08135e+06	9.67094e+07
qe	High	mITmINNkTFNR	1	12	N-Term(Dimethyl:2H(6)); M4(Oxidation); K8(Dimethyl:2H(6))	1	1	YPR006C	ICL2	1	2	1	783.946	1566.88	-2.29042	HCD	0	250	32.5276	8135	qExPlus02_00984.raw	43.21	35	28	9.0855e+06	0	0.01198	9102.34	3.66637e+06	9.09045e+06	1.00376e+08	9.09045e+06	1.00376e+08	11.0419
qe_Acetyl	High	mITmINNkTFNR	1	12	N-Term(Acetyl); M1(Oxidation); M4(Oxidation); K8(Dimethyl:2H(6))	1	1	YPR006C	ICL2	1	2	1	795.914	1590.82	-2.48337	HCD	0	250	36.7236	10015	qExPlus02_00983.raw	49.42	34	27	1.34062e+07	0	0.005677	19568.4	5.93797e+06	19568.4	5.93797e+06
qe_Acetyl	High	mITmINNkTFNR	1	12	N-Term(Acetyl); M1(Oxidation); M4(Oxidation); K8(Dimethyl:2H(6))	1	1	YPR006C	ICL2	1	2	1	795.914	1590.82	-2.40663	HCD	0	71.0865	36.4506	9943	qExPlus02_00983.raw	60.02	34	27	4.1233e+07	0	0.002653	19568.4	20346138	39136.7	2.62841e+07
qe_Acetyl	High	mITmINNkTFNR	1	12	N-Term(Acetyl); M1(Oxidation); M4(Oxidation); K8(Dimethyl:2H(6))	1	1	YPR006C	ICL2	1	2	1	795.915	1590.82	-1.40909	HCD	0	250	38.4801	10434	qExPlus02_00983.raw	60.02	34	27	2.38664e+06	0	0.000359	19568.4	1.50865e+06	58705.1	2.77928e+07
qe_Acetyl	High	mITmINNkTFNR	1	12	N-Term(Acetyl); M1(Oxidation); M4(Oxidation); K8(Dimethyl:2H(6))	1	1	YPR006C	ICL2	1	2	1	795.915	1590.82	-1.94623	HCD	7.16019	250	38.075	10339	qExPlus02_00983.raw	39.41	35	28	3.69221e+06	0.001447	0.03891	19568.4	1.51565e+06	78273.4	2.93084e+07
qe_Acetyl	High	mITMINNkTFNR	1	12	N-Term(Acetyl); M1(Oxidation); K8(Dimethyl:2H(6))	1	1	YPR006C	ICL2	1	2	1	787.918	1574.83	-1.16422	HCD	0	93.5691	43.903	11728	qExPlus02_00983.raw	65.84	35	28	3.91457e+07	0	0.0001449	19568.4	17057586	97841.8	4.6366e+07
qe_Acetyl	High	mITMINNkTFNR	1	12	N-Term(Acetyl); M1(Oxidation); K8(Dimethyl:2H(6))	1	1	YPR006C	ICL2	1	2	1	787.919	1574.83	0.153505	HCD	25.9631	250	46.6746	12399	qExPlus02_00983.raw	55.94	35	28	2.01498e+06	0	0.0003088	19568.4	796984	117410	4.7163e+07
qe_Acetyl	High	mITmINNkTFNR	1	12	N-Term(Acetyl); M4(Oxidation); K8(Dimethyl:2H(6))	1	1	YPR006C	ICL2	1	2	1	787.917	1574.83	-2.63697	HCD	0	250	47.9292	12718	qExPlus02_00983.raw	60.04	35	28	2.0229e+06	0	0.01518	19568.4	704247	136979	4.78672e+07
qe_Acetyl	High	mITMINNkTFNR	1	12	N-Term(Acetyl); M1(Oxidation); K8(Dimethyl:2H(6))	1	1	YPR006C	ICL2	1	2	1	787.917	1574.83	-2.48195	HCD	14.4954	250	46.3943	12330	qExPlus02_00983.raw	56.41	35	28	1.01285e+06	0	0.0009408	19568.4	406174	156547	4.82734e+07
qe_Acetyl	High	mITmINNkTFNR	1	12	N-Term(Acetyl); M1(Oxidation); M4(Oxidation); K8(Dimethyl:2H(6))	1	1	YPR006C	ICL2	1	2	1	795.915	1590.82	-1.56256	HCD	5.03993	135.606	44.1756	11794	qExPlus02_00983.raw	58.09	34	27	1.87726e+07	0	0.007794	19568.4	7486808	176115	5.57602e+07
qe_Acetyl	High	mITMINNkTFNR	1	12	N-Term(Acetyl); M1(Oxidation); K8(Dimethyl:2H(6))	1	1	YPR006C	ICL2	1	2	1	787.918	1574.83	-0.544115	HCD	3.82452	94.1445	44.1727	11793	qExPlus02_00983.raw	63.3	35	28	3.45813e+07	0	0.009774	19568.4	13402922	195684	6.91631e+07
qe_Acetyl	High	mITmINNkTFNR	1	12	N-Term(Acetyl); M1(Oxidation); M4(Oxidation); K8(Dimethyl:2H(6))	1	1	YPR006C	ICL2	1	2	1	795.916	1590.82	-0.0278784	HCD	14.7261	239.875	43.9075	11729	qExPlus02_00983.raw	47.12	35	28	1.6087e+07	0	0.0114	19568.4	5.67731e+06	215252	7.48404e+07
qe_Acetyl	High	mITmINNkTFNR	1	12	N-Term(Acetyl); M4(Oxidation); K8(Dimethyl:2H(6))	1	1	YPR006C	ICL2	1	2	1	787.918	1574.83	-0.931682	HCD	2.54266	82.0109	45.2594	12055	qExPlus02_00983.raw	47.72	35	28	1.22285e+08	0	0.0003969	19568.4	49013684	234820	1.23854e+08
qe_Acetyl	High	mITmINNkTFNR	1	12	N-Term(Acetyl); M1(Oxidation); M4(Oxidation); K8(Dimethyl:2H(6))	1	1	YPR006C	ICL2	1	2	1	795.915	1590.82	-1.02542	HCD	0	209.393	45.3132	12069	qExPlus02_00983.raw	57.8	34	27	25814338	0	0.01092	19568.4	10206860	254389	1.34061e+08
qe_Acetyl	High	mITMINNkTFNR	1	12	N-Term(Acetyl); M1(Oxidation); K8(Dimethyl:2H(6))	1	1	YPR006C	ICL2	1	2	1	787.919	1574.83	-0.156548	HCD	15.3117	250	54.3862	14303	qExPlus02_00983.raw	9.46	35	28	1.61978e+06	0.003945	0.08404	19568.4	636762	273957	1.34698e+08
qe_Acetyl	High	mITMINNkTFNR	1	12	N-Term(Acetyl); M1(Oxidation); K8(Dimethyl:2H(6))	1	1	YPR006C	ICL2	1	2	1	787.917	1574.83	-1.78433	HCD	11.7903	250	52.8015	13932	qExPlus02_00983.raw	29.76	35	28	1.60837e+06	0	0.009329	19568.4	531012	293525	1.35229e+08
qe_Acetyl	High	mITMINNkTFNR	1	12	N-Term(Acetyl); K8(Dimethyl:2H(6))	1	1	YPR006C	ICL2	1	2	1	779.924	1558.84	3.15772	HCD	28.6001	156.574	54.643	14362	qExPlus02_00983.raw	51.82	35	28	3.44258e+08	0	0.0005222	19568.4	138633280	313094	2.73862e+08
qe_Acetyl	High	mITmINNkTFNR	1	12	N-Term(Acetyl); M1(Oxidation); M4(Oxidation); K8(Dimethyl:2H(6))	1	1	YPR006C	ICL2	1	2	1	795.915	1590.82	-1.71603	HCD	14.1262	231.227	54.6632	14367	qExPlus02_00983.raw	43.17	34	27	6.87437e+07	0	0.0139	19568.4	27979768	332662	3.01842e+08
qe_Acetyl	High	mITMINNkTFNR	1	12	N-Term(Acetyl); M1(Oxidation); K8(Dimethyl:2H(6))	1	1	YPR006C	ICL2	1	2	1	787.918	1574.83	-1.08671	HCD	20.1879	107.844	54.9333	14432	qExPlus02_00983.raw	43.61	35	28	1.42789e+08	0	0.01438	19568.4	54029084	352231	3.55871e+08	352231	3.55871e+08	1010.34
qe	High	mITmINNkTFNR	1	12	N-Term(Dimethyl:2H(6)); M1(Oxidation); M4(Oxidation); K8(Dimethyl:2H(6))	1	1	YPR006C	ICL2	1	3	1	528.301	1582.89	2.82614	HCD	40.8694	250	32.2635	8069	qExPlus02_00984.raw	27.61	35	28	6.42879e+06	0	0.01093	9102.34	3.17158e+06	9102.34	3.17158e+06
qe	High	mITmINNkTFNR	1	12	N-Term(Dimethyl:2H(6)); M4(Oxidation); K8(Dimethyl:2H(6))	1	1	YPR006C	ICL2	1	3	1	522.969	1566.89	2.57014	HCD	0	250	32.3144	8081	qExPlus02_00984.raw	43.43	35	28	915921	0	0.009215	9102.34	719135	18204.7	3.89072e+06	18204.7	3.89072e+06	213.721
qe_Acetyl	High	mITMINNkTFNR	1	12	N-Term(Acetyl); M1(Oxidation); K8(Dimethyl:2H(6))	1	1	YPR006C	ICL2	1	3	1	525.615	1574.83	0.0286965	HCD	0	250	43.9616	11742	qExPlus02_00983.raw	34.95	35	28	2.76916e+06	0	0.009996	19568.4	1.1408e+06	19568.4	1.1408e+06
qe_Acetyl	High	mITmINNkTFNR	1	12	N-Term(Acetyl); M4(Oxidation); K8(Dimethyl:2H(6))	1	1	YPR006C	ICL2	1	3	1	525.614	1574.83	-1.48281	HCD	10.6759	250	45.3683	12083	qExPlus02_00983.raw	10.62	35	28	6.1843e+06	0	0.0116	19568.4	2.5918e+06	39136.7	3732592
qe_Acetyl	High	mITMINNkTFNR	1	12	N-Term(Acetyl); K8(Dimethyl:2H(6))	1	1	YPR006C	ICL2	1	3	1	520.283	1558.83	-1.07957	HCD	0	250	54.7011	14376	qExPlus02_00983.raw	23.42	35	28	6.26569e+06	0	0.003855	19568.4	3377229	58705.1	7109821	58705.1	7109821	121.111
qe	High	iTmINNkTFNR	2	12	N-Term(Dimethyl:2H(6)); M3(Oxidation); K7(Dimethyl:2H(6))	1	1	YPR006C	ICL2	1	2	1	718.428	1435.85	0.276297	HCD	0	250	25.9566	6423	qExPlus02_00984.raw	45.59	35	28	6.24207e+06	0	0.003579	9102.34	3.67266e+06	9102.34	3.67266e+06	9102.34	3.67266e+06	403.486
qe	High	mINNkTFNR	4	12	N-Term(Dimethyl:2H(6)); M1(Oxidation); K5(Dimethyl:2H(6))	1	1	YPR006C	ICL2	1	2	1	611.361	1221.71	-1.65031	HCD	29.8563	250	12.2336	2953	qExPlus02_00984.raw	9.4	35	28	1.45248e+07	0	0.04976	9102.34	8.06796e+06	9102.34	8.06796e+06
qe	High	mINNkTFNR	4	12	N-Term(Dimethyl:2H(6)); K5(Dimethyl:2H(6))	1	1	YPR006C	ICL2	1	2	1	603.364	1205.72	-0.321257	HCD	0	250	14.2826	3440	qExPlus02_00984.raw	36.28	36	29	9.96717e+06	0	0.001273	9102.34	6558334	18204.7	1.46263e+07	18204.7	1.46263e+07	803.436
qe_Acetyl	High	mINNkTFNR	4	12	N-Term(Acetyl); M1(Oxidation); K5(Dimethyl:2H(6))	1	1	YPR006C	ICL2	1	2	1	615.331	1229.65	-2.59465	HCD	7.1624	35.7493	31.0055	8409	qExPlus02_00983.raw	38.37	34	27	1.57701e+08	0	0.008571	19568.4	83696960	19568.4	83696960
qe_Acetyl	High	mINNkTFNR	4	12	N-Term(Acetyl); K5(Dimethyl:2H(6))	1	1	YPR006C	ICL2	1	2	1	607.333	1213.66	-2.69485	HCD	5.06869	7.59581	30.9438	8384	qExPlus02_00983.raw	41.5	36	29	1.38872e+09	0	0.01287	19568.4	709751872	39136.7	793448832
qe_Acetyl	High	mINNkTFNR	4	12	N-Term(Acetyl); K5(Dimethyl:2H(6))	1	1	YPR006C	ICL2	1	2	1	607.334	1213.66	-0.984991	HCD	13.2611	110.735	31.2175	8486	qExPlus02_00983.raw	65.27	36	29	4.65354e+06	0	0.005573		2.64494e+06	39136.7	7.96094e+08
qe_Acetyl	High	mINNkTFNR	4	12	N-Term(Acetyl); M1(Oxidation); K5(Dimethyl:2H(6))	1	1	YPR006C	ICL2	1	2	1	615.334	1229.66	1.97186	HCD	6.66804	50.6963	22.8574	5701	qExPlus02_00983.raw	41.21	35	28	2.21721e+08	0	0.009309	19568.4	113230168	58705.1	9.09324e+08
qe_Acetyl	High	mINNkTFNR	4	12	N-Term(Acetyl); M1(Oxidation); K5(Dimethyl:2H(6))	1	1	YPR006C	ICL2	1	2	1	615.331	1229.66	-1.80047	HCD	10.7033	219.907	24.2517	6078	qExPlus02_00983.raw	28.11	35	28	1.93032e+07	0	0.006497	19568.4	10528211	78273.4	9.19852e+08
qe_Acetyl	High	mINNkTFNR	4	12	N-Term(Acetyl); M1(Oxidation); K5(Dimethyl:2H(6))	1	1	YPR006C	ICL2	1	2	1	615.332	1229.66	-1.40338	HCD	0	250	24.7948	6245	qExPlus02_00983.raw	3.75	35	28	6.44807e+06	0	0.004403	19568.4	4.8265e+06	97841.8	924678651
qe_Acetyl	Medium	mINNkTFNR	4	12	N-Term(Acetyl); M1(Oxidation); K5(Dimethyl:2H(6))	1	1	YPR006C	ICL2	1	2	1	615.332	1229.66	-0.907025	HCD	0	250	23.1936	5790	qExPlus02_00983.raw	23.94	35	28	2.58943e+06	0.02654	0.1834	19568.4	1.40112e+06	117410	9.2608e+08
qe_Acetyl	Medium	mINNkTFNR	4	12	N-Term(Acetyl); M1(Oxidation); K5(Dimethyl:2H(6))	1	1	YPR006C	ICL2	1	2	1	615.33	1229.65	-3.38882	HCD	22.4857	136.731	24.514	6156	qExPlus02_00983.raw	16.54	35	28	4929780	0.01294	0.1288			117410	9.2608e+08	117410	9.2608e+08	7887.56
qe	High	sLPANTSIYPSSYQAR	77	92	N-Term(Dimethyl)	1	1	YPR006C	ICL2	0	2	1	891.956	1782.9	1.6075	HCD	0	250	41.1407	11072	qExPlus02_00983.raw	53.52	35	28	540677	0	9.647e-06	540677	725451	540677	725451	540677	725451	1.34175
qe	High	tSIYPSSYQAR	82	92	N-Term(Dimethyl:2H(6))	1	1	YPR006C	ICL2	0	2	1	653.848	1306.69	-1.22141	HCD	13.2919	250	29.0982	7772	qExPlus02_00983.raw	33.92	33	26	9.41761e+06	0	0.00927	5.48546e+06	9.41761e+06	5.48546e+06	9.41761e+06	5.48546e+06	9.41761e+06	1.71683
qe_Acetyl	High	tLATAAQAER	10	19	N-Term(Acetyl)	1	1	YNL037C	IDH1	0	2	1	537.282	1073.56	-2.08787	HCD	16.2447	33.4896	35.679	9069	qExPlus02_00982.raw	60.41	34	27	113795154	0	0.002853			0	0	0	0
qe	Medium	lATAAQAER	11	19	N-Term(Dimethyl)	1	1	YNL037C	IDH1	0	1	1	958.531	958.531	-0.704427	HCD	0	250	11.9688	2884	qExPlus02_00983.raw	56.58	35	28	1.53043e+06	0.01714	0.244	1150869		1150869	0	1150869	0
qe	Medium	lATAAQAER	11	19	N-Term(Dimethyl)	1	1	YNL037C	IDH1	0	2	1	479.769	958.53	-1.92829	HCD	8.7357	250	11.9825	2913	qExPlus02_00982.raw	14.13	36	29	3.78128e+06	0.01366	0.203	3.6637e+06	654006	3.6637e+06	654006
qe	High	lATAAQAER	11	19	N-Term(Dimethyl:2H(6))	1	1	YNL037C	IDH1	0	2	1	482.786	964.566	-3.69038	HCD	6.57725	250	50.9667	13306	qExPlus02_00982.raw	20.32	35	28	2.47718e+06	0.005861	0.1988			3.6637e+06	654006
qe	High	lATAAQAER	11	19	N-Term(Dimethyl)	1	1	YNL037C	IDH1	0	2	1	479.768	958.53	-2.183	HCD	3.12078	224.038	51.0977	13339	qExPlus02_00982.raw	37.28	36	29	1.43432e+07	0.0008655	0.02664	8677182	9102.34	1.23409e+07	663108
qe	High	lATAAQAER	11	19	N-Term(Dimethyl:2H(6))	1	1	YNL037C	IDH1	0	2	1	482.787	964.567	-2.04517	HCD	0	250	11.8582	2857	qExPlus02_00983.raw	31.86	35	28	6.07719e+07	0	0.02038	199545094	6.07719e+07	2.11886e+08	6.1435e+07
qe	High	lATAAQAER	11	19	N-Term(Dimethyl)	1	1	YNL037C	IDH1	0	2	1	479.769	958.53	-1.60991	HCD	6.706	250	12.384	2991	qExPlus02_00983.raw	23.97	35	28	2.57676e+06	0.008862	0.1534	2.57676e+06	999728	2.14463e+08	6.24347e+07	2.14463e+08	6.24347e+07	0.291121
qe_Acetyl	High	tLPkkYGGR	20	28	N-Term(Acetyl); K4(Dimethyl:2H(6)); K5(Dimethyl:2H(6))	1	1	YNL037C	IDH1	2	2	1	565.378	1129.75	0.187152	HCD	20.39	250	16.1436	3926	qExPlus02_00984.raw	20.45	29	22	4.33214e+06	0	0.01121	5.73138e+06	4.33214e+06	5.73138e+06	4.33214e+06	5.73138e+06	4.33214e+06	0.755862
Fusion_Acetyl	High	mLRNTFFRNTSR	1	12	N-Term(Acetyl)	1	1	YOR136W	IDH2	2	3	1	528.94	1584.8	-1.26193	ETD	40.1891	50	4.99214	2895	Fusion002161.raw	36.82	34	27	7.07129e+06	0	0.004947			0	0	0	0
qe	High	lATVkQPSIGR	15	25	N-Term(Dimethyl); K5(Dimethyl)	1	1	YOR136W	IDH2	1	2	1	613.385	1225.76	0.148953	HCD	27.5516	250	20.9609	5124	qExPlus02_00984.raw	31.92	33	26	148568132	0.0008655	0.01654			0	0
qe	High	lATVkQPSIGR	15	25	N-Term(Dimethyl:2H(6)); K5(Dimethyl:2H(6))	1	1	YOR136W	IDH2	1	2	1	619.422	1237.84	-0.941003	HCD	39.1797	77.7437	21.2191	5191	qExPlus02_00984.raw	56.33	32	25	9.80504e+07	0	0.002541	971413030	9.80504e+07	971413030	9.80504e+07
qe	High	lATVkQPSIGR	15	25	N-Term(Dimethyl:2H(6)); K5(Dimethyl:2H(6))	1	1	YOR136W	IDH2	1	2	1	619.422	1237.84	-0.54654	HCD	37.2514	250	21.4916	5258	qExPlus02_00984.raw	57.46	32	25	1.80919e+06	0	0.001035	8.87146e+06	1.80919e+06	9.80284e+08	9.98596e+07
qe	High	lATVkQPSIGR	15	25	N-Term(Dimethyl); K5(Dimethyl)	1	1	YOR136W	IDH2	1	2	1	613.385	1225.76	-0.647744	HCD	21.4515	250	21.7593	5320	qExPlus02_00984.raw	30.57	33	26	826221	0	0.002826	714414	88773.9	9.80999e+08	9.99484e+07
qe	High	lATVkQPSIGR	15	25	N-Term(Dimethyl); K5(Dimethyl)	1	1	YOR136W	IDH2	1	2	1	613.384	1225.76	-1.24527	HCD	15.6598	95.5239	22.275	5454	qExPlus02_00984.raw	28.16	32	25	4519926	0	0.00489	2.75811e+06	9102.34	9.83757e+08	9.99575e+07	9.83757e+08	9.99575e+07	0.101608
qe	High	lATVkQPSIGR	15	25	N-Term(Dimethyl); K5(Dimethyl)	1	1	YOR136W	IDH2	1	3	1	409.258	1225.76	-1.75417	HCD	51.699	225.697	21.0132	5138	qExPlus02_00984.raw	29.37	32	25	5.89078e+07	0.005141	0.0749	5.79656e+07	1.15386e+07	5.79656e+07	1.15386e+07	5.79656e+07	1.15386e+07	0.199059
qe	High	aTVkQPSIGR	16	25	N-Term(Dimethyl:2H(6)); K4(Dimethyl:2H(6))	1	1	YOR136W	IDH2	1	2	1	562.879	1124.75	-3.46109	HCD	28.6852	250	36.6839	10006	qExPlus02_00983.raw	25.82	33	26	1.7229e+06	0	0.012	9102.34	1.15111e+06	9102.34	1.15111e+06
qe	High	aTVkQPSIGR	16	25	N-Term(Dimethyl:2H(6)); K4(Dimethyl:2H(6))	1	1	YOR136W	IDH2	1	2	1	562.879	1124.75	-2.8099	HCD	13.826	250	13.9562	3361	qExPlus02_00984.raw	29.66	33	27	627068	0.005861	0.1731	728128	627068	737231	1.77818e+06
qe	High	aTVkQPSIGR	16	25	N-Term(Dimethyl:2H(6)); K4(Dimethyl:2H(6))	1	1	YOR136W	IDH2	1	2	1	562.879	1124.75	-2.15872	HCD	13.7254	3.83196	14.6375	3549	qExPlus02_00984.raw	43.42	33	26	8.61903e+08	0	0.003335	1.80136e+09	8.61903e+08	1.80209e+09	8.63681e+08
qe	High	aTVkQPSIGR	16	25	N-Term(Dimethyl:2H(6)); K4(Dimethyl:2H(6))	1	1	YOR136W	IDH2	1	2	1	562.879	1124.75	-3.02696	HCD	9.86631	132.343	14.8973	3616	qExPlus02_00984.raw	56	33	26	1.00581e+07	0	0.0008733	2.20549e+07	1.00581e+07	1.82415e+09	8.73739e+08
qe	High	aTVkQPSIGR	16	25	N-Term(Dimethyl:2H(6)); K4(Dimethyl:2H(6))	1	1	YOR136W	IDH2	1	2	1	562.881	1124.75	0.337487	HCD	61.8702	250	15.1688	3687	qExPlus02_00984.raw	49.75	33	26	2.7225e+06	0	0.0006058	4.54525e+06	2.7225e+06	1.82869e+09	8.76462e+08
qe	High	aTVkQPSIGR	16	25	N-Term(Dimethyl:2H(6)); K4(Dimethyl:2H(6))	1	1	YOR136W	IDH2	1	2	1	562.879	1124.75	-3.5453	HCD		250	15.6803	3813	qExPlus02_00984.raw	22.61	33	26	1.46349e+06	0.00358	0.1296	2.99643e+06	1.46349e+06	1.83169e+09	8.77925e+08	1.83169e+09	8.77925e+08	0.479298
qe	High	aTVkQPSIGR	16	25	N-Term(Dimethyl:2H(6)); K4(Dimethyl:2H(6))	1	1	YOR136W	IDH2	1	3	1	375.588	1124.75	-4.04283	HCD	59.0437	127.98	14.5581	3522	qExPlus02_00984.raw	21.55	33	26	3.26115e+06	0.004334	0.1559	13406165	3.26115e+06	13406165	3.26115e+06	13406165	3.26115e+06	0.243258
qe_Acetyl	High	skIkVVHPIVEmDGDEQTR	2	20	N-Term(Acetyl); K2(Dimethyl:2H(6)); K4(Dimethyl:2H(6)); M12(Oxidation)	1	1	YNL009W	IDP3	2	3	1	769.762	2307.27	-1.81842	HCD	8.08778	250	33.7364	8539	qExPlus02_00984.raw	34.31	35	28	5.70599e+06	0	1.267e-05		1.52129e+06	0	1.52129e+06
qe_Acetyl	High	skIkVVHPIVEMDGDEQTR	2	20	N-Term(Acetyl); K2(Dimethyl:2H(6)); K4(Dimethyl:2H(6))	1	1	YNL009W	IDP3	2	3	1	764.431	2291.28	-1.90039	HCD		250	33.722	8534	qExPlus02_00984.raw	29.87	34	27	4873878	0	0.0004153	1.41473e+06	3.54925e+06	1.41473e+06	5.07053e+06	1.41473e+06	5.07053e+06	3.5841
qe	High	sATLLkQPLcTVVR	2	15	N-Term(Dimethyl:2H(6)); K6(Dimethyl:2H(6)); C10(Carbamidomethyl)	1	1	YER086W	ILV1	1	2	1	827.53	1654.05	3.58205	HCD	8.33955	250	38.227	9718	qExPlus02_00984.raw	71.81	32	25	2.45956e+06	0	0.001066	9102.34	966654	9102.34	966654	9102.34	966654	106.198
qe_Acetyl	High	sATLLkQPLcTVVR	2	15	N-Term(Acetyl); K6(Dimethyl:2H(6)); C10(Carbamidomethyl)	1	1	YER086W	ILV1	1	2	1	831.497	1661.99	-1.84233	HCD	0	30.5825	55.0866	14473	qExPlus02_00983.raw	65.58	33	26	2.59853e+08	0	1.105e-05	19568.4	102384632	19568.4	102384632	19568.4	102384632	5232.15
Fusion	High	sATLLkQPLcTVVR	2	15	N-Term(Dimethyl:2H(6)); K6(Dimethyl:2H(6)); C10(Carbamidomethyl)	1	1	YER086W	ILV1	1	2	1	827.527	1654.05	0.0396059	HCD	3.47735	35.6829	3.19147	1850	Fusion002161.raw	56.87	22	15	1.00532e+07	0	0.008208	3532.53	4405937	3532.53	4405937	3532.53	4405937	1247.25
qe_Acetyl	High	sATLLkQPLcTVVR	2	15	N-Term(Acetyl); K6(Dimethyl:2H(6)); C10(Carbamidomethyl)	1	1	YER086W	ILV1	1	3	1	554.668	1661.99	0.793722	HCD	0	250	54.9545	14438	qExPlus02_00983.raw	60.05	33	26	7.72053e+06	0	5.021e-05	19568.4	3624497	19568.4	3624497	19568.4	3624497	185.222
Fusion	High	sATLLkQPLcTVVR	2	15	N-Term(Dimethyl:2H(6)); K6(Dimethyl:2H(6)); C10(Carbamidomethyl)	1	1	YER086W	ILV1	1	3	1	552.02	1654.05	-0.337528	HCD	15.7066	35.6979	3.09998	1794	Fusion002161.raw	41.12	22	15	2.40007e+08	0	0.001433	3532.53	95378232	3532.53	95378232	3532.53	95378232	27000
qe	High	aEPDmDTSFVGLTGGQIFNEMmSR	81	104	N-Term(Dimethyl); M5(Oxidation); M22(Oxidation)	1	1	YMR108W	ILV2	0	3	1	898.405	2693.2	4.35785	HCD	0	250	78.6522	20190	qExPlus02_00983.raw	69.5	29	22	2.05118e+06	0.0008655	0.02424	1.04735e+06	9102.34	1.04735e+06	9102.34	1.04735e+06	9102.34	0.00869079
qe	High	gGQIFNEmMSR	94	104	N-Term(Dimethyl); M8(Oxidation)	1	1	YMR108W	ILV2	0	2	2	657.3	1313.59	-4.43308	HCD	26.986	250	32.1504	8771	qExPlus02_00983.raw	24.93	30	23	7.26932e+06	0.005141	0.06185	6.62473e+06	576283	6.62473e+06	576283	6.62473e+06	576283	0.0869896
qe	High	gLLTkVATSR	2	11	N-Term(Dimethyl:2H(6)); K5(Dimethyl:2H(6))	1	1	YJR016C	ILV3	1	2	1	557.39	1113.77	-2.08418	HCD	4.91136	44.039	20.3412	4968	qExPlus02_00984.raw	67.24	31	24	121423446	0	0.001366	9102.34	63366820	9102.34	63366820
qe	High	gLLTkVATSR	2	11	N-Term(Dimethyl:2H(6)); K5(Dimethyl:2H(6))	1	1	YJR016C	ILV3	1	2	1	557.389	1113.77	-2.96098	HCD	0	178.95	20.6095	5038	qExPlus02_00984.raw	48.19	31	24	31501278	0	0.0248	9102.34	16312099	18204.7	79678919	18204.7	79678919	4376.84
qe_Acetyl	Medium	mLRTQAAR	1	8	N-Term(Acetyl); M1(Oxidation)	1	1	YLR355C	ILV5	1	2	1	502.769	1004.53	-0.617447	HCD	0	250	13.6117	3294	qExPlus02_00983.raw	12.32	34	27	7.58646e+06	0.01294	0.1191			0	0	0	0
qe_Acetyl	High	tFALATR	21	27	N-Term(Acetyl)	1	1	YLR355C	ILV5	0	2	1	411.228	821.449	-2.59288	HCD	16.3201	35.9568	53.0337	13848	qExPlus02_00982.raw	27.64	32	25	46389681	0.001447	0.05646			0	0	0	0
qe	Medium	fALATR	22	27	N-Term(Dimethyl:2H(6))	1	1	YLR355C	ILV5	0	1	1	712.461	712.461	-1.30844	HCD	0	2.11092	26.1545	6721	qExPlus02_00983.raw	26.12	32	25	2053782176	0.04554	0.4042	9102.34	1405068544	9102.34	1405068544
qe	Medium	fALATR	22	27	N-Term(Dimethyl:2H(6))	1	1	YLR355C	ILV5	0	1	1	712.461	712.461	-1.47978	HCD	0	50.5277	26.4095	6809	qExPlus02_00983.raw	26.78	32	25	3.95118e+06	0.03517	0.3566	9102.34	2.36205e+06	18204.7	1.40743e+09
qe	Medium	fALATR	22	27	N-Term(Dimethyl:2H(6))	1	1	YLR355C	ILV5	0	1	1	712.46	712.46	-3.10747	HCD	0	166.328	26.789	6953	qExPlus02_00983.raw	26.11	32	25	3.56007e+06	0.04229	0.3948			18204.7	1.40743e+09	18204.7	1.40743e+09	77311.5
qe	Medium	fALATR	22	27	N-Term(Dimethyl:2H(6))	1	1	YLR355C	ILV5	0	2	1	356.734	712.461	-2.09832	HCD	6.42277	0.471537	26.1163	6711	qExPlus02_00983.raw	29.29	32	25	10773307943	0.0347	0.3521	9102.34	7255647232	9102.34	7255647232	9102.34	7255647232	797119
qe_Acetyl	Medium	gLkQINFGGTVETVYER	47	63	N-Term(Acetyl); K3(Dimethyl:2H(6))	1	1	YLR355C	ILV5	1	2	1	994.05	1987.09	8.17439	HCD		250	42.9277	10911	qExPlus02_00984.raw	50.13	35	28	166795	0.01213	0.1112			0	0	0	0
qe	High	gLkQINFGGTVETVYER	47	63	N-Term(Dimethyl); K3(Dimethyl)	1	1	YLR355C	ILV5	1	3	1	656.357	1967.06	-1.17217	HCD	37.5217	250	42.5168	10815	qExPlus02_00984.raw	15.83	36	29	595445	0.004844	0.04376	494857	140170	494857	140170	494857	140170	0.283254
Fusion	High	gLkQINFGGTVETVYER	47	63	N-Term(Dimethyl:2H(6)); K3(Dimethyl:2H(6))	1	1	YLR355C	ILV5	1	3	1	660.383	1979.13	-0.7356	HCD	5.5441	40.5729	5.78526	3350	Fusion002161.raw	91.95	21	14	8.53696e+07	0	0.0001884	4.52382e+07	8.47949e+07	4.52382e+07	8.47949e+07	4.52382e+07	8.47949e+07	1.87441
qe	High	lkQINFGGTVETVYER	48	63	N-Term(Dimethyl:2H(6)); K2(Dimethyl:2H(6))	1	1	YLR355C	ILV5	1	2	1	961.559	1922.11	-0.983467	HCD	4.04935	250	41.1345	10464	qExPlus02_00984.raw	69.93	35	28	4.42144e+06	0	6.622e-08	9102.34	1.48817e+06	9102.34	1.48817e+06
qe	High	lkQINFGGTVETVYER	48	63	N-Term(Dimethyl); K2(Dimethyl)	1	1	YLR355C	ILV5	1	2	1	955.522	1910.04	-0.987267	HCD	0	101.954	41.4657	10555	qExPlus02_00984.raw	84.56	36	29	324852517	0	7.019e-07	324852517	1.10118e+08	3.24862e+08	1.11606e+08	3.24862e+08	1.11606e+08	0.343549
qe	High	lkQINFGGTVETVYER	48	63	N-Term(Dimethyl:2H(6)); K2(Dimethyl:2H(6))	1	1	YLR355C	ILV5	1	3	1	641.376	1922.11	-0.450642	HCD	4.08005	122.755	41.0976	10454	qExPlus02_00984.raw	83.35	35	28	2.69088e+07	0	0.0006324	9102.34	8814238	9102.34	8814238
qe	High	lkQINFGGTVETVYER	48	63	N-Term(Dimethyl); K2(Dimethyl)	1	1	YLR355C	ILV5	1	3	1	637.35	1910.04	-0.706713	HCD	0.920107	6.72142	41.4394	10549	qExPlus02_00984.raw	63.08	36	29	1.66831e+09	0	0.001119	1652036276	289500007	1.65205e+09	298314245
qe	High	lkQINFGGTVETVYER	48	63	N-Term(Dimethyl:2H(6)); K2(Dimethyl:2H(6))	1	1	YLR355C	ILV5	1	3	1	641.377	1922.12	1.35935	HCD	9.62007	43.8605	41.6189	10598	qExPlus02_00984.raw	77.82	35	28	4.22912e+07	0	2.731e-05	1.28809e+08	4.22912e+07	1.78085e+09	3.40605e+08
qe	High	lkQINFGGTVETVYER	48	63	N-Term(Dimethyl); K2(Dimethyl)	1	1	YLR355C	ILV5	1	3	1	637.351	1910.04	0.251935	HCD	0	46.9708	41.7145	10621	qExPlus02_00984.raw	71.04	36	29	2.00037e+07	0	5.062e-06	2.00037e+07	7.62827e+06	1.80086e+09	3.48234e+08
qe	High	lkQINFGGTVETVYER	48	63	N-Term(Dimethyl:2H(6)); K2(Dimethyl:2H(6))	1	1	YLR355C	ILV5	1	3	1	641.374	1922.11	-2.73694	HCD	35.9299	250	42.0335	10700	qExPlus02_00984.raw	61.59	35	28	2.12447e+06	0	0.0001561	9102.34	1.2712e+06	1.80087e+09	3.49505e+08
qe	High	lkQINFGGTVETVYER	48	63	N-Term(Dimethyl); K2(Dimethyl)	1	1	YLR355C	ILV5	1	3	1	637.35	1910.04	-1.18604	HCD	5.05639	250	42.2724	10757	qExPlus02_00984.raw	84.05	36	29	9.35989e+06	0	6.194e-07	9.35989e+06	4.06915e+06	1.81023e+09	3.53574e+08
qe	High	lkQINFGGTVETVYER	48	63	N-Term(Dimethyl:2H(6)); K2(Dimethyl:2H(6))	1	1	YLR355C	ILV5	1	3	1	641.377	1922.12	1.45461	HCD	8.30965	250	42.5121	10814	qExPlus02_00984.raw	58.1	35	28	670751	0	0.003947	1.62354e+06	670751	1.81185e+09	3.54245e+08
qe	High	lkQINFGGTVETVYER	48	63	N-Term(Dimethyl); K2(Dimethyl)	1	1	YLR355C	ILV5	1	3	1	637.35	1910.04	-1.23408	HCD		250	42.8	10882	qExPlus02_00984.raw	59.84	36	29	1.26854e+06	0	0.0006884	446057	9102.34	1.8123e+09	3.54254e+08
qe	High	lkQINFGGTVETVYER	48	63	N-Term(Dimethyl); K2(Dimethyl)	1	1	YLR355C	ILV5	1	3	1	637.35	1910.03	-1.85709	HCD	20.8897	149.615	43.2076	10977	qExPlus02_00984.raw	59.08	36	29	2.41619e+06	0	0.0006017	2.25316e+06	1.14805e+06	1.81455e+09	3.55402e+08
qe	High	lkQINFGGTVETVYER	48	63	N-Term(Dimethyl); K2(Dimethyl)	1	1	YLR355C	ILV5	1	3	1	637.349	1910.03	-3.29506	HCD	66.3074	250	43.7607	11108	qExPlus02_00984.raw	62.85	36	29	405219	0	6.919e-06	159575	9102.34	1.81471e+09	3.55411e+08
qe	High	lkQINFGGTVETVYER	48	63	N-Term(Dimethyl); K2(Dimethyl)	1	1	YLR355C	ILV5	1	3	1	637.35	1910.04	-1.5695	HCD	9.68862	250	46.1232	11673	qExPlus02_00984.raw	49.82	36	29	1.41046e+06	0	0.0001148	519608	9102.34	1.81523e+09	3.5542e+08
qe	High	lkQINFGGTVETVYER	48	63	N-Term(Dimethyl); K2(Dimethyl)	1	1	YLR355C	ILV5	1	3	1	637.349	1910.03	-2.62401	HCD	0	250	49.8512	12578	qExPlus02_00984.raw	62.91	36	29	949642	0	0.0008311	751058	431419	1.81598e+09	3.55852e+08
qe	High	lkQINFGGTVETVYER	48	63	N-Term(Dimethyl); K2(Dimethyl)	1	1	YLR355C	ILV5	1	3	1	637.347	1910.03	-6.17101	HCD	63.5096	250	58.5297	14694	qExPlus02_00984.raw	37.98	36	29	678328	0	0.008088		9102.34	1.81598e+09	3.55861e+08
qe	High	lkQINFGGTVETVYER	48	63	N-Term(Dimethyl); K2(Dimethyl)	1	1	YLR355C	ILV5	1	3	1	637.351	1910.04	-0.131524	HCD	21.7924	250	82.5145	20422	qExPlus02_00984.raw	19.14	36	29	76183.5	0.005141	0.06834	37361.8	9102.34	1.81602e+09	3.5587e+08	1.81602e+09	3.5587e+08	0.195962
qe	High	fGGTVETVYER	53	63	N-Term(Dimethyl:2H(6))	1	1	YLR355C	ILV5	0	2	1	646.343	1291.68	-0.54715	HCD	0	250	33.4114	9166	qExPlus02_00983.raw	24.07	33	26	2.74309e+06	0	0.0478	9102.34	2.09002e+06	9102.34	2.09002e+06	9102.34	2.09002e+06	229.614
qe	High	gGTVETVYER	54	63	N-Term(Dimethyl:2H(6))	1	1	YLR355C	ILV5	0	2	1	572.81	1144.61	0.603284	HCD	13.4747	250	21.0851	5225	qExPlus02_00983.raw	55.32	33	26	4.0409e+06	0	0.002583	4.11452e+06	3.78741e+06	4.11452e+06	3.78741e+06	4.11452e+06	3.78741e+06	0.920499
qe	High	tVETVYER	56	63	N-Term(Dimethyl:2H(6))	1	1	YLR355C	ILV5	0	2	1	515.788	1030.57	-0.673043	HCD	27.248	250	20.0529	4942	qExPlus02_00983.raw	18.12	33	26	9.38847e+06	0.002744	0.09829	6.14656e+06	9.38847e+06	6.14656e+06	9.38847e+06	6.14656e+06	9.38847e+06	1.52744
qe	High	sAVSSIIYETPAPSR	58	72	N-Term(Dimethyl)	1	1	YCL009C	ILV6	0	2	1	803.426	1605.84	-2.40026	HCD	0	250	43.4206	11612	qExPlus02_00983.raw	77.13	36	29	749385	0	3.58e-06	749385	656080	749385	656080	749385	656080	0.875491
qe	High	vSSIIYETPAPSR	60	72	N-Term(Dimethyl)	1	1	YCL009C	ILV6	0	2	1	724.392	1447.78	-1.86873	HCD	13.8262	250	38.2703	10384	qExPlus02_00983.raw	54.29	36	29	5.27913e+06	0	2.466e-05	4.61852e+06	551894	4.61852e+06	551894	4.61852e+06	551894	0.119496
qe	High	sSIIYETPAPSR	61	72	N-Term(Dimethyl)	1	1	YCL009C	ILV6	0	2	1	674.857	1348.71	-2.32763	HCD	9.09987	250	33.5616	9202	qExPlus02_00983.raw	54.31	36	29	2.24595e+07	0	0.0001088	1.89645e+07	4094256	1.89645e+07	4094256	1.89645e+07	4094256	0.215891
qe	High	sSIIYETPAPSRQPR	61	75	N-Term(Dimethyl)	1	1	YCL009C	ILV6	1	2	1	865.464	1729.92	-1.06733	HCD	0	250	26.2755	6499	qExPlus02_00984.raw	39.02	36	29	3.5555e+06	0	0.0001499	1.90534e+06	9102.34	1.90534e+06	9102.34	1.90534e+06	9102.34	0.00477727
qe	High	sIIYETPAPSR	62	72	N-Term(Dimethyl)	1	1	YCL009C	ILV6	0	2	1	631.342	1261.68	-1.38752	HCD	18.1838	250	33.627	9218	qExPlus02_00983.raw	46.45	36	29	4.59105e+06	0	0.0005362	4221478	1.13441e+06	4221478	1.13441e+06	4221478	1.13441e+06	0.268723
qe	High	ymVPATkR	16	23	N-Term(Dimethyl:2H(6)); M2(Oxidation); K7(Dimethyl:2H(6))	1	1	YCR046C	IMG1	1	2	1	525.332	1049.66	-0.342561	HCD	33.6948	250	12.269	2961	qExPlus02_00984.raw	17.15	34	27	8.95543e+06	0.002744	0.1116	1.51168e+07	8.95543e+06	1.51168e+07	8.95543e+06
qe	High	yMVPATkR	16	23	N-Term(Dimethyl:2H(6)); K7(Dimethyl:2H(6))	1	1	YCR046C	IMG1	1	2	1	517.334	1033.66	-1.48823	HCD	0	250	14.3491	3458	qExPlus02_00984.raw	24.36	35	28	1.08209e+07	0.009045	0.2139	9102.34	9455174	1.51259e+07	1.84106e+07	1.51259e+07	1.84106e+07	1.21716
qe_Acetyl	High	mISScVTR	1	8	N-Term(Acetyl); C5(Carbamidomethyl)	1	1	YCR071C	IMG2	0	1	1	995.463	995.463	-2.10417	HCD	10.888	250	42.4925	11078	qExPlus02_00982.raw	25.82	35	28	4.97329e+07	0.005022	0.09679			0	0
qe_Acetyl	High	mISScVTR	1	8	N-Term(Acetyl); M1(Oxidation); C5(Carbamidomethyl)	1	1	YCR071C	IMG2	0	1	1	1011.46	1011.46	-3.07787	HCD	0	250	42.3079	11029	qExPlus02_00982.raw	28.26	32	25	1.08248e+07	0.005022	0.08951			0	0	0	0
qe_Acetyl	High	mISScVTR	1	8	N-Term(Acetyl); C5(Carbamidomethyl)	1	1	YCR071C	IMG2	0	2	1	498.235	995.463	-2.05636	HCD	0.40628	12.6314	42.4513	11067	qExPlus02_00982.raw	58.13	33	26	4.71003e+08	0.001447	0.05581			0	0
qe_Acetyl	High	mISScVTR	1	8	N-Term(Acetyl); M1(Oxidation); C5(Carbamidomethyl)	1	1	YCR071C	IMG2	0	2	1	506.232	1011.46	-2.12567	HCD	0.55931	30.6519	31.2457	7855	qExPlus02_00982.raw	58.32	31	24	5.26763e+07	0.001447	0.05752			0	0
qe_Acetyl	High	mISScVTR	1	8	N-Term(Acetyl); M1(Oxidation); C5(Carbamidomethyl)	1	1	YCR071C	IMG2	0	2	1	506.232	1011.46	-2.3067	HCD	15.0087	250	30.9776	7783	qExPlus02_00982.raw	36.1	31	24	6.32117e+07	0.002723	0.06655			0	0
qe_Acetyl	Medium	mISScVTR	1	8	N-Term(Acetyl); M1(Oxidation); C5(Carbamidomethyl)	1	1	YCR071C	IMG2	0	2	1	506.232	1011.46	-2.60841	HCD	0	250	33.0174	8340	qExPlus02_00982.raw	23.61	31	24	1.22512e+06	0.04505	0.2787			0	0	0	0
Fusion	High	tVGTLPIWSkTFSYAIR	2	18	N-Term(Dimethyl:2H(6)); K10(Dimethyl:2H(6))	1	1	YMR150C	IMP1	1	3	1	670.072	2008.2	-0.938621	HCD	43.5651	55.5676	30.4513	16822	Fusion002161.raw	21.28	22	15	3.33739e+06	0	0.1849	4.03771e+06	3.33739e+06	4.03771e+06	3.33739e+06	4.03771e+06	3.33739e+06	0.826554
qe	High	rFYSEGSTGTPR	20	31	N-Term(Dimethyl:2H(6))	1	1	YDL181W	INH1	1	2	1	696.362	1391.72	-0.637618	HCD	0	250	14.8224	3595	qExPlus02_00984.raw	40.79	33	26	2.5047e+07	0	0.002332	9102.34	13251567	9102.34	13251567
qe	High	rFYSEGSTGTPR	20	31	N-Term(Dimethyl:2H(6))	1	1	YDL181W	INH1	1	2	1	696.361	1391.71	-2.91813	HCD	0	250	15.0949	3668	qExPlus02_00984.raw	13.53	33	26	2.23818e+06	0.002744	0.1156			9102.34	13251567	9102.34	13251567	1455.84
qe	Medium	fYSEGSTGTPR	21	31	N-Term(Dimethyl:2H(6))	1	1	YDL181W	INH1	0	2	1	618.312	1235.62	0.00311509	HCD	0	250	17.2963	4241	qExPlus02_00983.raw	12.58	31	24	5.07192e+06	0.02179	0.2727	9102.34	3019118	9102.34	3019118	9102.34	3019118	331.686
qe_Acetyl	High	gSGSEDSFVkR	32	42	N-Term(Acetyl); K10(Dimethyl)	1	1	YDL181W	INH1	1	2	1	619.803	1238.6	-1.70331	HCD	0	250	22.7656	5671	qExPlus02_00983.raw	59.65	35	28	2.89194e+06	0	0.0248	2.46694e+06		2.46694e+06	0	2.46694e+06	0
qe	High	mQAkLLFTR	1	9	N-Term(Dimethyl:2H(6)); K4(Dimethyl:2H(6))	1	1	YPR067W	ISA2	1	2	1	588.39	1175.77	-0.181043	HCD	27.0712	250	31.673	7921	qExPlus02_00984.raw	33.48	33	26	7.16166e+06	0	0.002167	9102.34	4461417	9102.34	4461417	9102.34	4461417	490.14
qe	High	sDLVTkEPLITPkR	36	49	N-Term(Dimethyl:2H(6)); K6(Dimethyl:2H(6)); K13(Dimethyl:2H(6))	1	1	YPR067W	ISA2	2	2	1	850.071	1699.13	-2.85842	HCD	15.9961	250	27.9537	6926	qExPlus02_00984.raw	68.37	30	23	2.17567e+06	0	3.678e-05	1.14254e+07	2.17567e+06	1.14254e+07	2.17567e+06	1.14254e+07	2.17567e+06	0.190424
qe	High	sDLVTkEPLITPkR	36	49	N-Term(Dimethyl:2H(6)); K6(Dimethyl:2H(6)); K13(Dimethyl:2H(6))	1	1	YPR067W	ISA2	2	3	1	567.051	1699.14	-0.495536	HCD	43.1307	37.4965	27.9617	6930	qExPlus02_00984.raw	48.55	29	22	2.95867e+07	0	0.01199	5.17227e+07	2.95867e+07	5.17227e+07	2.95867e+07	5.17227e+07	2.95867e+07	0.572024
qe	High	mLPVITR	1	7	N-Term(Dimethyl:2H(6))	1	1	YPL135W	ISU1	0	1	1	863.563	863.563	-2.27689	HCD	11.6494	85.8566	38.276	10386	qExPlus02_00983.raw	27.49	34	27	1.78388e+07	0.002744	0.1016	9102.34	11282632	9102.34	11282632	9102.34	11282632	1239.53
qe	Medium	mLPVITR	1	7	N-Term(Dimethyl:2H(6)); M1(Oxidation)	1	1	YPL135W	ISU1	0	2	1	440.283	879.558	-2.22908	HCD	29.0765	31.3048	32.6258	8907	qExPlus02_00983.raw	7.75	33	26	106735473	0.03915	0.3782	9102.34	68882888	9102.34	68882888
qe	Medium	mLPVITR	1	7	N-Term(Dimethyl:2H(6)); M1(Oxidation)	1	1	YPL135W	ISU1	0	2	1	440.282	879.557	-3.47815	HCD	48.3617	3.29922	32.9708	9020	qExPlus02_00983.raw	13.31	33	26	1.50482e+08	0.01602	0.2383	9102.34	92447224	18204.7	161330112
qe	Medium	mLPVITR	1	7	N-Term(Dimethyl:2H(6))	1	1	YPL135W	ISU1	0	2	1	432.285	863.563	-2.50449	HCD	20.3705	87.3374	38.4304	10422	qExPlus02_00983.raw	26.78	34	27	2.26187e+08	0.01308	0.2226		139447168	18204.7	300777280
qe	Medium	mLPVITR	1	7	N-Term(Dimethyl:2H(6)); M1(Oxidation)	1	1	YPL135W	ISU1	0	2	1	440.283	879.558	-2.57604	HCD	2.87254	250	38.4398	10424	qExPlus02_00983.raw	20.85	33	26	4.16973e+07	0.02313	0.2858			18204.7	300777280	18204.7	300777280	16522
qe_Acetyl	High	mLPVITR	1	7	N-Term(Acetyl); M1(Oxidation)	1	1	YPL135W	ISU1	0	2	1	444.253	887.499	-2.77581	HCD	66.4449	145.976	56.8189	14806	qExPlus02_00982.raw	14.43	36	29	1.87962e+08	0.005022	0.07541			0	0
qe_Acetyl	High	mLPVITR	1	7	N-Term(Acetyl)	1	1	YPL135W	ISU1	0	2	1	436.256	871.505	-2.84865	HCD	2.14442	9.82175	69.8548	18005	qExPlus02_00982.raw	39.74	34	27	252868546	0.002723	0.06833			0	0
qe_Acetyl	High	mLPVITR	1	7	N-Term(Acetyl); M1(Oxidation)	1	1	YPL135W	ISU1	0	2	1	444.253	887.499	-2.70703	HCD	40.61	85.2024	69.6856	17964	qExPlus02_00982.raw	29.63	33	26	3.06953e+07	0.00508	0.09357			0	0
qe_Acetyl	Medium	mLPVITR	1	7	N-Term(Acetyl); M1(Oxidation)	1	1	YPL135W	ISU1	0	2	1	444.253	887.499	-3.46352	HCD	0	129.595	56.2257	14634	qExPlus02_00982.raw	30.12	33	26	2.07698e+07	0.01487	0.1392			0	0	0	0
qe	High	mLkYLVQR	1	8	N-Term(Dimethyl:2H(6)); K3(Dimethyl:2H(6))	1	1	YGL018C	JAC1	1	2	1	559.88	1118.75	1.20971	HCD	0	250	26.6332	6585	qExPlus02_00984.raw	26.9	33	26	2.35948e+06	0	0.002375	9102.34	1.04927e+06	9102.34	1.04927e+06	9102.34	1.04927e+06	115.275
qe_Acetyl	High	mLkYLVQR	1	8	N-Term(Acetyl); K3(Dimethyl:2H(6))	1	1	YGL018C	JAC1	1	2	1	563.85	1126.69	-0.166114	HCD	4.3281	79.729	55.7615	14649	qExPlus02_00983.raw	47.32	33	26	4.20594e+07	0	0.01044	19568.4	22193556	19568.4	22193556	19568.4	22193556	1134.16
qe_Acetyl	High	sSSITDEkISGEQQQPAGR	2	20	N-Term(Acetyl); K8(Dimethyl)	1	1	YKL217W	JEN1	1	2	1	1044.51	2088.02	-0.610891	HCD	0	250	29.701	8003	qExPlus02_00983.raw	85.63	36	29	8.53139e+06	0	5.945e-05	8.17842e+06	8.87692e+06	8.17842e+06	8.87692e+06	8.17842e+06	8.87692e+06	1.08541
qe_Acetyl	High	sSSITDEkISGEQQQPAGR	2	20	N-Term(Acetyl); K8(Dimethyl)	1	1	YKL217W	JEN1	1	3	1	696.678	2088.02	-0.383482	HCD	0	250	29.657	7991	qExPlus02_00983.raw	49.56	36	29	2.25141e+07	0	0.000366	2.25141e+07	1.52926e+07	2.25141e+07	1.52926e+07	2.25141e+07	1.52926e+07	0.679247
qe	High	hNPSLPAQSIQDTR	58	71	N-Term(Dimethyl)	1	1	YKL217W	JEN1	0	2	1	796.412	1591.82	-1.7138	HCD	0	250	22.6121	5533	qExPlus02_00984.raw	30.49	36	29	1.7182e+06	0.0008655	0.01569	612700	9102.34	612700	9102.34	612700	9102.34	0.0148561
qe	High	hNPSLPAQSIQDTR	58	71	N-Term(Dimethyl)	1	1	YKL217W	JEN1	0	3	1	531.278	1591.82	-0.41858	HCD	0	250	22.6458	5541	qExPlus02_00984.raw	62.42	36	29	1.16436e+06	0	0.0002164	710137	9102.34	710137	9102.34	710137	9102.34	0.0128177
qe	High	qSIQDTRDDELLER	65	78	N-Term(Dimethyl:2H(6))	1	1	YKL217W	JEN1	1	2	1	876.456	1751.9	-0.134898	HCD		250	29.1531	7230	qExPlus02_00984.raw	51.15	33	27	7.86539e+06	0	0.0001847	6.19113e+07	7.86539e+06	6.19113e+07	7.86539e+06
qe	High	qSIQDTRDDELLER	65	78	N-Term(Dimethyl)	1	1	YKL217W	JEN1	1	2	1	873.435	1745.86	-1.56739	HCD	0	250	29.4836	7319	qExPlus02_00984.raw	53.38	35	28	6.01674e+06	0	0.0004387	2.57185e+06	9102.34	6.44831e+07	7.8745e+06	6.44831e+07	7.8745e+06	0.122117
qe	High	iQDTRDDELLER	67	78	N-Term(Dimethyl)	1	1	YKL217W	JEN1	1	2	1	765.891	1530.78	-0.492376	HCD	18.0106	250	25.6779	6350	qExPlus02_00984.raw	12.18	35	28	1.05707e+06	0.004135	0.03587	631506	9102.34	631506	9102.34	631506	9102.34	0.0144137
qe	High	aASIkSYALTR	100	110	N-Term(Dimethyl); K5(Dimethyl)	1	1	YKL217W	JEN1	1	2	1	618.868	1236.73	-1.41685	HCD	15.3553	250	21.889	5350	qExPlus02_00984.raw	28.46	34	27	809001	0.004844	0.04316	809001	102357	809001	102357	809001	102357	0.126522
qe_Acetyl	High	mLRFVSSQTcR	1	11	N-Term(Acetyl); C10(Carbamidomethyl)	1	1	YIL125W	KGD1	1	2	1	713.851	1426.69	0.99396	HCD	28.7883	250	48.9251	12963	qExPlus02_00983.raw	3.44	34	27	5.20796e+06	0.002723	0.08151			0	0	0	0
qe	High	iSVAANPFSITSNR	57	70	N-Term(Dimethyl)	1	1	YDR148C	KGD2	0	2	1	752.908	1504.81	-1.46163	HCD	4.27457	127.377	51.4309	13574	qExPlus02_00983.raw	85.08	36	29	1.8271e+07	0	1.039e-07	17781069	1.23149e+07	17781069	1.23149e+07	17781069	1.23149e+07	0.692584
qe	High	vAANPFSITSNR	59	70	N-Term(Dimethyl:2H(6))	1	1	YDR148C	KGD2	0	2	1	655.869	1310.73	-1.53751	HCD	10.4634	250	39.9143	10780	qExPlus02_00983.raw	69.18	34	27	4.57824e+06	0	0.0002103	9102.34	2.27955e+06	9102.34	2.27955e+06	9102.34	2.27955e+06	250.436
qe	High	aANPFSITSNR	60	70	N-Term(Dimethyl:2H(6))	1	1	YDR148C	KGD2	0	2	1	606.334	1211.66	-3.23018	HCD	30.8242	238.818	34.5892	9464	qExPlus02_00983.raw	42.97	34	27	1.29663e+08	0	0.01415	9102.34	68704928	9102.34	68704928	9102.34	68704928	7548.05
qe	High	aNPFSITSNR	61	70	N-Term(Dimethyl:2H(6))	1	1	YDR148C	KGD2	0	2	1	570.816	1140.62	-2.57136	HCD	28.2503	22.1473	32.9048	8997	qExPlus02_00983.raw	36.1	34	27	74139284	0.002744	0.117	9102.34	49287180	9102.34	49287180	9102.34	49287180	5414.78
qe	High	sSSGSSNIPQSP	16	27	N-Term(Dimethyl)	1	1	YPL155C	KIP2	0	2	2	588.281	1175.55	0.111621	HCD	36.8094	250	48.8715	12756	qExPlus02_00982.raw	2.67	32	25	4.48027e+07	0.005141	0.0692	24338092	9102.34	24338092	9102.34	24338092	9102.34	0.000373996
Fusion_Acetyl	High	sAFVRVVPRISR	2	13	N-Term(Acetyl)	1	1	YNL071W	LAT1	2	3	1	476.953	1428.84	0.0389189	ETD	33.8446	50	9.86101	5697	Fusion002161.raw	51.23	33	26	1.54751e+07	0	0.04619			0	0	0	0
qe	High	sNALNTDSDNASVR	34	47	N-Term(Dimethyl)	1	1	YOR196C	LIP5	0	2	1	746.354	1491.7	-1.20894	HCD	31.2898	250	18.0816	4445	qExPlus02_00983.raw	83.49	32	25	1.46756e+07	0	3.987e-07	1.40399e+07	7.87514e+06	1.40399e+07	7.87514e+06	1.40399e+07	7.87514e+06	0.56091
qe	Medium	lSIHEYR	31	37	N-Term(Dimethyl)	1	1	YGR244C	LSC2	0	1	1	945.514	945.514	-1.40213	HCD	0	178.97	18.6219	4539	qExPlus02_00984.raw	34.86	35	28	1.89193e+07	0.0414	0.3793	1.89193e+07	1.31308e+07	1.89193e+07	1.31308e+07	1.89193e+07	1.31308e+07	0.694041
qe	High	lSIHEYR	31	37	N-Term(Dimethyl:2H(6))	1	1	YGR244C	LSC2	0	2	1	476.28	951.552	-0.768363	HCD	35.9316	245.1	18.5139	4512	qExPlus02_00984.raw	34.29	34	27	1.26442e+08	0.001946	0.08686			0	0
qe	High	lSIHEYR	31	37	N-Term(Dimethyl)	1	1	YGR244C	LSC2	0	2	1	473.261	945.515	-0.318962	HCD	0	57.6404	18.8272	4593	qExPlus02_00984.raw	52.12	35	28	1.38818e+08	0	0.004764			0	0
qe	Medium	lSIHEYR	31	37	N-Term(Dimethyl)	1	1	YGR244C	LSC2	0	2	1	473.261	945.514	-1.41635	HCD	21.9391	250	19.0928	4655	qExPlus02_00984.raw	20.21	35	28	5.71929e+06	0.01366	0.208	5.1851e+06	3.76186e+06	5.1851e+06	3.76186e+06
qe	High	lSIHEYR	31	37	N-Term(Dimethyl:2H(6))	1	1	YGR244C	LSC2	0	2	1	476.279	951.551	-1.53807	HCD	0	207.009	19.3307	4712	qExPlus02_00984.raw	30.03	35	28	2.79015e+06	0.002744	0.1173	3.9612e+06	2.79015e+06	9.1463e+06	6.55201e+06
qe	High	lSIHEYR	31	37	N-Term(Dimethyl:2H(6))	1	1	YGR244C	LSC2	0	2	1	476.279	951.552	-1.34565	HCD	53.5299	250	20.6831	5056	qExPlus02_00984.raw	18.19	35	28	3.45786e+06	0.005861	0.1961	3.5747e+06	3.45786e+06	1.2721e+07	1.00099e+07	1.2721e+07	1.00099e+07	0.786877
qe_Acetyl	High	aMEVVASER	71	79	N-Term(Acetyl)	1	1	YPL004C	LSP1	0	2	1	517.251	1033.5	-2.76973	HCD	0	250	47.8419	12479	qExPlus02_00982.raw	11.48	35	28	3.56493e+06	0	0.0521			0	0
qe_Acetyl	High	aMEVVASER	71	79	N-Term(Acetyl)	1	1	YPL004C	LSP1	0	2	1	517.252	1033.5	-1.35237	HCD	5.83518	250	46.3393	12083	qExPlus02_00982.raw	33.1	35	28	2.90399e+06	0.009219	0.1159			0	0	0	0
qe	High	lSTISSQIPGTR	16	27	N-Term(Dimethyl)	1	1	YLR163C	MAS1	0	1	1	1287.73	1287.73	-1.23721	HCD	100	250	35.1643	9607	qExPlus02_00983.raw	56.71	36	29	5.43366e+06	0	3.108e-05	5.43366e+06	5.25939e+06	5.43366e+06	5.25939e+06	5.43366e+06	5.25939e+06	0.967928
qe	High	lSTISSQIPGTR	16	27	N-Term(Dimethyl:2H(6))	1	1	YLR163C	MAS1	0	2	1	647.384	1293.76	-2.56456	HCD	38.3516	250	35.0043	9568	qExPlus02_00983.raw	35.53	35	28	2.44608e+08	0	0.02052	2.68388e+08	2.44608e+08	2.68388e+08	2.44608e+08
qe	High	lSTISSQIPGTR	16	27	N-Term(Dimethyl:2H(6))	1	1	YLR163C	MAS1	0	2	1	647.385	1293.76	-1.33797	HCD	24.6778	250	35.6168	9722	qExPlus02_00983.raw	36.96	35	28	338040	0	0.0007162			2.68388e+08	2.44608e+08	2.68388e+08	2.44608e+08	0.911396
qe	High	sTISSQIPGTR	17	27	N-Term(Dimethyl)	1	1	YLR163C	MAS1	0	1	1	1174.64	1174.64	-1.08075	HCD	0	125.481	26.1332	6715	qExPlus02_00983.raw	43.04	36	29	1.13957e+07	0	0.005605	1.11432e+07	4.34079e+06	1.11432e+07	4.34079e+06	1.11432e+07	4.34079e+06	0.389545
qe	High	sTISSQIPGTR	17	27	N-Term(Dimethyl)	1	1	YLR163C	MAS1	0	2	1	587.823	1174.64	-2.59906	HCD	4.0433	16.7436	26.0344	6679	qExPlus02_00983.raw	58.03	36	29	734529673	0	0.0007041	734529673	409352619	734529673	409352619	734529673	409352619	0.557299
qe_Acetyl	High	sDWDTNTIIGSR	2	13	N-Term(Acetyl)	1	1	YOR298C-A	MBF1	0	2	1	703.828	1406.65	-4.46839	HCD	0	250	61.4743	15960	qExPlus02_00982.raw	72.28	34	27	1.78823e+07	0	0.02183			0	0	0	0
qe	High	aATAFYFANR	24	33	N-Term(Dimethyl:2H(6))	1	1	YKL150W	MCR1	0	2	1	583.316	1165.63	-1.57728	HCD	0	250	38.6721	10480	qExPlus02_00983.raw	46.6	33	26	1.46212e+08	0	0.004676	1.7086e+08	1.46212e+08	1.7086e+08	1.46212e+08
qe	High	aATAFYFANR	24	33	N-Term(Dimethyl)	1	1	YKL150W	MCR1	0	2	1	580.297	1159.59	-2.4783	HCD	52.9499	237.56	39.2899	10633	qExPlus02_00983.raw	28.37	34	27	956791	0.001683	0.02996	956791	939940	1.71817e+08	1.47152e+08
qe	High	aATAFYFANR	24	33	N-Term(Dimethyl)	1	1	YKL150W	MCR1	0	2	1	580.298	1159.59	-0.478164	HCD	31.2132	250	39.5792	10702	qExPlus02_00983.raw	32.34	34	27	325068	0.0008655	0.02009	143914		1.71961e+08	1.47152e+08	1.71961e+08	1.47152e+08	0.855731
qe	High	aTAFYFANR	25	33	N-Term(Dimethyl)	1	1	YKL150W	MCR1	0	2	1	544.779	1088.55	-1.73889	HCD	2.95663	250	37.1179	10111	qExPlus02_00983.raw	41.51	34	27	1.66802e+07	0	0.008948	1.66802e+07	31729883	1.66802e+07	31729883	1.66802e+07	31729883	1.90225
qe_Acetyl	High	mLkSASQNFFR	1	11	N-Term(Acetyl); M1(Oxidation); K3(Dimethyl:2H(6))	1	1	YBR227C	MCX1	1	2	1	710.878	1420.75	-1.91894	HCD	1.85686	250	41.0569	11053	qExPlus02_00983.raw	38.36	35	28	1.08939e+07	0	0.002346	19568.4	5777185	19568.4	5777185
qe_Acetyl	High	mLkSASQNFFR	1	11	N-Term(Acetyl); M1(Oxidation); K3(Dimethyl:2H(6))	1	1	YBR227C	MCX1	1	2	1	710.879	1420.75	-1.14567	HCD	6.3053	250	40.7797	10989	qExPlus02_00983.raw	28.99	34	27	1.08339e+07	0.001447	0.04415	19568.4	4157746	39136.7	9934931
qe_Acetyl	High	mLkSASQNFFR	1	11	N-Term(Acetyl); M1(Oxidation); K3(Dimethyl:2H(6))	1	1	YBR227C	MCX1	1	2	1	710.88	1420.75	0.0572056	HCD	16.0953	250	50.7529	13408	qExPlus02_00983.raw	21.94	34	27	9.97334e+06	0.001447	0.02012	19568.4	5.16044e+06	58705.1	1.50954e+07	58705.1	1.50954e+07	257.139
qe	High	aFQQGVLSR	2	10	N-Term(Dimethyl:2H(6))	1	1	YFL016C	MDJ1	0	2	1	520.311	1039.62	-1.23471	HCD	0	132.351	26.2292	6745	qExPlus02_00983.raw	25.57	35	28	8.7361e+07	0	0.005387	9102.34	55991596	9102.34	55991596	9102.34	55991596	6151.34
qe_Acetyl	High	aFQQGVLSR	2	10	N-Term(Acetyl)	1	1	YFL016C	MDJ1	0	2	1	524.282	1047.56	-1.88024	HCD	0	157.651	50.1987	13108	qExPlus02_00982.raw	54.78	36	29	1.16626e+07	0	0.05964			0	0	0	0
Fusion	High	mLNGRLPLLR	1	10	N-Term(Dimethyl:2H(6))	1	1	YPL270W	MDL2	1	3	1	406.266	1216.78	0.562219	HCD	38.0165	49.4918	5.52352	3200	Fusion002161.raw	15.24	24	17	5.25106e+06	0	0.2136	3532.53	2.9192e+06	3532.53	2.9192e+06
Fusion	High	mLNGRLPLLR	1	10	N-Term(Dimethyl:2H(6)); M1(Oxidation)	1	1	YPL270W	MDL2	1	3	1	411.597	1232.78	-0.197006	HCD	40.5253	34.3136	1.03179	587	Fusion002161.raw	13.01	22	15	3.85889e+06	0	0.2027	421957	3.62015e+06	425489	6.53935e+06	425489	6.53935e+06	15.369
qe	High	mLPYmDQVLR	1	10	N-Term(Dimethyl:2H(6)); M5(Oxidation)	1	1	YAL010C	MDM10	0	2	1	658.353	1315.7	-2.50498	HCD	3.87726	250	44.3009	11823	qExPlus02_00983.raw	36.03	33	26	3.03302e+06	0	0.02536			0	0
qe	High	mLPYmDQVLR	1	10	N-Term(Dimethyl:2H(6)); M5(Oxidation)	1	1	YAL010C	MDM10	0	2	1	658.354	1315.7	-0.742164	HCD	18.5708	250	44.6227	11900	qExPlus02_00983.raw	32.2	33	26	4.98781e+06	0	0.01014	2.13632e+06	4.98781e+06	2.13632e+06	4.98781e+06
qe	High	mLPYmDQVLR	1	10	N-Term(Dimethyl); M5(Oxidation)	1	1	YAL010C	MDM10	0	2	1	655.336	1309.66	0.0484394	HCD	0	250	44.7726	11937	qExPlus02_00983.raw	25.52	35	28	4.37464e+06	0	0.008916			2.13632e+06	4.98781e+06
qe	High	mLPYMDQVLR	1	10	N-Term(Dimethyl:2H(6))	1	1	YAL010C	MDM10	0	2	1	650.356	1299.7	-1.75215	HCD	9.6746	250	57.4735	15054	qExPlus02_00983.raw	39.59	34	27	1.24425e+07	0	0.01533		7265185	2.13632e+06	1.2253e+07
qe	High	mLPYmDQVLR	1	10	N-Term(Dimethyl:2H(6)); M5(Oxidation)	1	1	YAL010C	MDM10	0	2	1	658.354	1315.7	-0.463825	HCD	0	250	57.5454	15071	qExPlus02_00983.raw	44.03	33	26	5.22328e+06	0	0.008014	9102.34	2.81189e+06	2.14542e+06	1.50649e+07
qe	High	mLPYMDQVLR	1	10	N-Term(Dimethyl)	1	1	YAL010C	MDM10	0	2	1	647.337	1293.67	-1.52265	HCD	0	250	57.7224	15115	qExPlus02_00983.raw	42.84	36	29	1.22668e+07	0	0.005606	6.72489e+06	9102.34	8.87031e+06	1.5074e+07	8.87031e+06	1.5074e+07	1.69938
qe_Acetyl	Medium	mLNFASR	1	7	N-Term(Acetyl)	1	1	YOL027C	MDM38	0	2	1	440.72	880.433	-2.0709	HCD	0	250	61.2816	15913	qExPlus02_00982.raw	7.57	35	28	4.21893e+06	0.01654	0.1521			0	0	0	0
qe	High	sVQkMMWVPR	2	11	N-Term(Dimethyl:2H(6)); K4(Dimethyl:2H(6))	1	1	YLR069C	MEF1	1	2	1	665.399	1329.79	-0.850739	HCD	11.7014	43.6107	32.6608	8167	qExPlus02_00984.raw	22.47	35	28	1.52541e+07	0.009045	0.2142	9102.34	8816031	9102.34	8816031	9102.34	8816031	968.546
qe_Acetyl	High	sVQkmMWVPR	2	11	N-Term(Acetyl); K4(Dimethyl:2H(6)); M5(Oxidation)	1	1	YLR069C	MEF1	1	2	2	677.368	1353.73	0.520183	HCD	0	250	49.6305	13130	qExPlus02_00983.raw	29.34	35	28	4.42912e+06	0	0.008726	19568.4	2.23624e+06	19568.4	2.23624e+06
qe_Acetyl	High	sVQkMMWVPR	2	11	N-Term(Acetyl); K4(Dimethyl:2H(6))	1	1	YLR069C	MEF1	1	2	1	669.369	1337.73	-2.54479	HCD	12.1345	250	49.5859	13120	qExPlus02_00983.raw	52.37	35	28	1.12665e+07	0	0.0004071	19568.4	5.08236e+06	39136.7	7318598	39136.7	7318598	187.001
qe	Medium	fHESPLAR	35	42	N-Term(Dimethyl:2H(6))	1	1	YLR069C	MEF1	0	2	1	495.785	990.564	-0.280273	HCD	7.17384	250	15.5169	3769	qExPlus02_00984.raw	35.08	33	26	4.23534e+06	0.01877	0.2634	9102.34	2.90021e+06	9102.34	2.90021e+06	9102.34	2.90021e+06	318.623
qe	High	qkLTPDDIGR	57	66	N-Term(Dimethyl); K2(Dimethyl)	1	1	YLR069C	MEF1	1	2	1	599.843	1198.68	-0.211728	HCD	0	250	20.4995	5010	qExPlus02_00984.raw	27.54	35	28	2.84277e+06	0.0008655	0.02497	2.84277e+06	1.3078e+06	2.84277e+06	1.3078e+06	2.84277e+06	1.3078e+06	0.460044
qe	Medium	mIIkNPLR	55	62	N-Term(Dimethyl); K4(Dimethyl)	1	1	YOR241W	MET7	1	2	1	520.836	1040.66	-0.273277	HCD	25.6025	250	28.5903	7085	qExPlus02_00984.raw	13.73	32	25	1.01775e+06	0.0414	0.3805	1.01775e+06	3.57412e+06	1.01775e+06	3.57412e+06
qe	Medium	mIIkNPLR	55	62	N-Term(Dimethyl); K4(Dimethyl)	1	1	YOR241W	MET7	1	2	1	520.836	1040.66	-0.977079	HCD	21.7238	135.708	28.943	7178	qExPlus02_00984.raw	19.41	32	25	4.84889e+06	0.01216	0.1637	2.35947e+06		3.37722e+06	3.57412e+06	3.37722e+06	3.57412e+06	1.0583
qe_Acetyl	High	mkSIFkVR	1	8	N-Term(Acetyl); K2(Dimethyl:2H(6)); K6(Dimethyl:2H(6))	1	1	YJR144W	MGM101	2	2	1	559.879	1118.75	-0.863742	HCD	33.2894	52.1405	34.1234	8640	qExPlus02_00984.raw	14.15	29	22	1.31105e+07	0.001447	0.0215	19568.4	7.35826e+06	19568.4	7.35826e+06
qe_Acetyl	High	mkSIFkVR	1	8	N-Term(Acetyl); K2(Dimethyl:2H(6)); K6(Dimethyl:2H(6))	1	1	YJR144W	MGM101	2	2	1	559.879	1118.75	0.118276	HCD	5.72183	185.262	33.8485	8570	qExPlus02_00984.raw	24.19	29	22	1.09691e+08	0.00508	0.09997	19568.4	59936480	39136.7	6.72947e+07
qe_Acetyl	High	mkSIFkVR	1	8	N-Term(Acetyl); M1(Oxidation); K2(Dimethyl:2H(6)); K6(Dimethyl:2H(6))	1	1	YJR144W	MGM101	2	2	1	567.876	1134.74	-0.673388	HCD	21.7856	250	34.2109	8666	qExPlus02_00984.raw	12.83	30	23	28655929	0	0.007411	19568.4	18791134	58705.1	8.60859e+07	58705.1	8.60859e+07	1466.41
qe_Acetyl	Medium	mkSIFkVR	1	8	N-Term(Acetyl); M1(Oxidation); K2(Dimethyl:2H(6)); K6(Dimethyl:2H(6))	1	1	YJR144W	MGM101	2	3	1	378.92	1134.74	-1.30379	HCD	0	250	23.1358	5660	qExPlus02_00984.raw	3.64	30	23	1.29639e+06	0.01213	0.1117	19568.4	894862	19568.4	894862	19568.4	894862	45.7301
qe	High	vVSTGTSNTATAGAVR	23	38	N-Term(Dimethyl:2H(6))	1	1	YJR144W	MGM101	0	2	1	763.426	1525.85	0.0925536	HCD	10.072	241.348	19.1986	4728	qExPlus02_00983.raw	93.39	34	27	2.11001e+08	0	0.0001205	231034098	209689481	231034098	209689481
qe	High	vVSTGTSNTATAGAVR	23	38	N-Term(Dimethyl:2H(6))	1	1	YJR144W	MGM101	0	2	1	763.425	1525.84	-1.10747	HCD	0	250	19.4611	4793	qExPlus02_00983.raw	65.88	34	27	349331	0	7.263e-05	120980	286553	2.31155e+08	2.09976e+08	2.31155e+08	2.09976e+08	0.908377
qe_Acetyl	High	vVSTGTSNTATAGAVR	23	38	N-Term(Acetyl)	1	1	YJR144W	MGM101	0	2	1	767.397	1533.79	-0.51438	HCD	0	250	19.0662	4696	qExPlus02_00983.raw	51.73	36	29	4.04788e+06	0	0.008583			0	0	0	0
qe	High	vVSTGTSNTATAGAVR	23	38	N-Term(Dimethyl:2H(6))	1	1	YJR144W	MGM101	0	3	1	509.286	1525.84	-1.43629	HCD	11.9621	250	18.9331	4658	qExPlus02_00983.raw	58.48	34	27	44137712	0	0.008588	4.60364e+07	44137712	4.60364e+07	44137712	4.60364e+07	44137712	0.958758
qe	High	mASSPQFGR	32	40	N-Term(Dimethyl)	1	1	YKL195W	MIA40	0	1	1	1008.49	1008.49	-0.567549	HCD	0	172.702	20.5522	5086	qExPlus02_00983.raw	43.52	33	26	5.74697e+06	0	0.003695	3681944		3681944	0	3681944	0
qe	High	mASSPQFGR	32	40	N-Term(Dimethyl); M1(Oxidation)	1	1	YKL195W	MIA40	0	2	1	512.747	1024.49	-0.314882	HCD	0	250	15.4906	3773	qExPlus02_00983.raw	52.78	32	25	2.88359e+07	0.0008655	0.02393	2.88359e+07	4.32544e+07	2.88359e+07	4.32544e+07
qe	High	mASSPQFGR	32	40	N-Term(Dimethyl); M1(Oxidation)	1	1	YKL195W	MIA40	0	2	1	512.746	1024.49	-2.69793	HCD	30.3331	70.2291	15.7443	3841	qExPlus02_00983.raw	49.98	33	26	24823992	0	0.002564			2.88359e+07	4.32544e+07
qe	High	mASSPQFGR	32	40	N-Term(Dimethyl:2H(6)); M1(Oxidation)	1	1	YKL195W	MIA40	0	2	1	515.766	1030.52	-1.44059	HCD	0	31.0121	15.6939	3826	qExPlus02_00983.raw	46.19	31	24	1.14723e+08	0	0.02168			2.88359e+07	4.32544e+07
qe	High	mASSPQFGR	32	40	N-Term(Dimethyl); M1(Oxidation)	1	1	YKL195W	MIA40	0	2	1	512.748	1024.49	-0.195729	HCD	0	250	16.5421	4060	qExPlus02_00983.raw	52.13	32	25	5.29012e+06	0.0008655	0.01954	3028086	9102.34	3.1864e+07	4.32635e+07
qe	High	mASSPQFGR	32	40	N-Term(Dimethyl); M1(Oxidation)	1	1	YKL195W	MIA40	0	2	1	512.747	1024.49	-1.38725	HCD	0	250	17.08	4190	qExPlus02_00983.raw	36.33	33	26	1.60141e+06	0.004135	0.03459	1.60141e+06	1.64605e+06	3.34654e+07	4.49096e+07
qe	High	mASSPQFGR	32	40	N-Term(Dimethyl); M1(Oxidation)	1	1	YKL195W	MIA40	0	2	1	512.746	1024.48	-3.7703	HCD	0	250	17.4402	4275	qExPlus02_00983.raw	39.15	32	25	383519	0	0.003636			3.34654e+07	4.49096e+07
qe	High	mASSPQFGR	32	40	N-Term(Dimethyl:2H(6)); M1(Oxidation)	1	1	YKL195W	MIA40	0	2	1	515.766	1030.52	-1.44059	HCD	14.6514	250	18.0882	4447	qExPlus02_00983.raw	42.44	31	24	1.58145e+06	0	0.02038	1570840	1.58145e+06	3.50363e+07	4.6491e+07
qe	High	mASSPQFGR	32	40	N-Term(Dimethyl); M1(Oxidation)	1	1	YKL195W	MIA40	0	2	1	512.748	1024.49	0.161728	HCD	0	250	18.1604	4465	qExPlus02_00983.raw	47.08	32	25	486769	0.0008655	0.01571			3.50363e+07	4.6491e+07
qe	High	mASSPQFGR	32	40	N-Term(Dimethyl:2H(6)); M1(Oxidation)	1	1	YKL195W	MIA40	0	2	1	515.766	1030.53	-0.611413	HCD	13.9807	250	18.7417	4606	qExPlus02_00983.raw	37.9	31	24	1.50222e+06	0	0.03649	1.91899e+06	1.50222e+06	3.69552e+07	4.79932e+07
qe	High	mASSPQFGR	32	40	N-Term(Dimethyl); M1(Oxidation)	1	1	YKL195W	MIA40	0	2	1	512.747	1024.49	-1.14895	HCD	16.718	250	18.8577	4634	qExPlus02_00983.raw	44.07	33	26	429211	0.0008655	0.0199			3.69552e+07	4.79932e+07
qe	High	mASSPQFGR	32	40	N-Term(Dimethyl); M1(Oxidation)	1	1	YKL195W	MIA40	0	2	1	512.747	1024.49	-1.2681	HCD	27.9669	250	19.2324	4736	qExPlus02_00983.raw	29.03	33	26	700060	0.0008655	0.01302	486793	9102.34	3.7442e+07	4.80023e+07
qe	High	mASSPQFGR	32	40	N-Term(Dimethyl:2H(6)); M1(Oxidation)	1	1	YKL195W	MIA40	0	2	1	515.765	1030.52	-2.15132	HCD	52.0408	250	19.6681	4846	qExPlus02_00983.raw	19.68	31	24	3.9478e+06	0	0.04103		2.63412e+06	3.7442e+07	5.06364e+07
qe	High	mASSPQFGR	32	40	N-Term(Dimethyl:2H(6)); M1(Oxidation)	1	1	YKL195W	MIA40	0	2	1	515.766	1030.53	-0.611413	HCD	4.32906	53.6041	20.4103	5045	qExPlus02_00983.raw	52.4	31	24	8.89565e+07	0	0.04252	9.0681e+07	8.89565e+07	1.28123e+08	1.39593e+08
qe	High	mASSPQFGR	32	40	N-Term(Dimethyl:2H(6))	1	1	YKL195W	MIA40	0	2	1	507.769	1014.53	-0.700022	HCD	8.6543	120.218	20.3607	5031	qExPlus02_00983.raw	39.49	32	25	2.5171e+08	0	0.007627	3.20802e+08	2.5171e+08	4.48925e+08	3.91303e+08
qe	Medium	mASSPQFGR	32	40	N-Term(Dimethyl)	1	1	YKL195W	MIA40	0	2	1	504.751	1008.49	0.932147	HCD	29.8489	217.476	20.9795	5199	qExPlus02_00983.raw	17.12	34	27	1.77003e+06	0.01714	0.2454	1.77003e+06	1.57687e+06	4.50695e+08	3.9288e+08	4.50695e+08	3.9288e+08	0.871721
qe	High	aSSPQFGR	33	40	N-Term(Dimethyl:2H(6))	1	1	YKL195W	MIA40	0	2	1	442.249	883.49	-0.645013	HCD	0	250	14.1041	3414	qExPlus02_00983.raw	35.75	33	26	2.7283e+07	0	0.04896	1.55966e+07	2.70172e+07	1.55966e+07	2.70172e+07
qe	Medium	aSSPQFGR	33	40	N-Term(Dimethyl:2H(6))	1	1	YKL195W	MIA40	0	2	1	442.248	883.489	-1.1286	HCD	13.3495	250	14.3596	3477	qExPlus02_00983.raw	21.31	33	26	2.04256e+06	0.01666	0.2527	1.8347e+06	2.04256e+06	1.74313e+07	2.90598e+07	1.74313e+07	2.90598e+07	1.6671
qe_Acetyl	High	sVSAAPAIPQYSVSDYMkF	2	20	N-Term(Acetyl); K18(Dimethyl)	1	1	YJR077C	MIR1	1	3	1	711.018	2131.04	-1.26953	HCD	0	250	83.1616	21243	qExPlus02_00982.raw	55.91	36	29	172246	0	0.008637		19568.4	0	19568.4	0	19568.4
qe	High	sSmVPIDVVkTR	33	44	N-Term(Dimethyl); M3(Oxidation); K10(Dimethyl)	1	1	YJR077C	MIR1	1	2	1	702.399	1403.79	-1.39991	HCD	0	250	29.7366	7387	qExPlus02_00984.raw	55.06	36	29	6.08049e+06	0	1.426e-05	4.91225e+06	2.34407e+06	4.91225e+06	2.34407e+06	4.91225e+06	2.34407e+06	0.477188
qe	High	sMVPIDVVkTR	34	44	N-Term(Dimethyl); K9(Dimethyl)	1	1	YJR077C	MIR1	1	2	1	650.886	1300.76	-0.786317	HCD	0	250	37.4123	9518	qExPlus02_00984.raw	88.81	35	28	1.38228e+06	0	0.0003769	1.38228e+06	1.21725e+06	1.38228e+06	1.21725e+06	1.38228e+06	1.21725e+06	0.88061
qe	High	yHILSGR	35	41	N-Term(Dimethyl)	1	1	YBR084W	MIS1	0	1	1	873.493	873.493	-1.64471	HCD	0	250	16.4463	4002	qExPlus02_00984.raw	31.09	34	27	1.17138e+06	0.006573	0.08607	1.17138e+06	1.19761e+06	1.17138e+06	1.19761e+06	1.17138e+06	1.19761e+06	1.02239
qe	High	yHILSGR	35	41	N-Term(Dimethyl:2H(6))	1	1	YBR084W	MIS1	0	2	1	440.269	879.531	-1.09618	HCD	0	250	16.2776	3958	qExPlus02_00984.raw	15.48	33	26	1.55832e+07	0.004334	0.1535	1.15993e+07	1.55832e+07	1.15993e+07	1.55832e+07
qe	High	yHILSGR	35	41	N-Term(Dimethyl:2H(6))	1	1	YBR084W	MIS1	0	2	1	440.268	879.53	-2.55347	HCD		250	16.547	4028	qExPlus02_00984.raw	6.95	34	27	156515	0.004334	0.1458			1.15993e+07	1.55832e+07	1.15993e+07	1.55832e+07	1.34346
qe	High	iTTLTPVSTk	18	27	N-Term(Dimethyl); K10(Dimethyl)	1	1	YIL051C	MMF1	0	2	1	558.847	1116.69	0.0857973	HCD	45.9021	165.583	31.0893	8442	qExPlus02_00983.raw	16.51	34	27	1.36269e+07	0.007065	0.1135	1.14038e+07	1.03937e+07	1.14038e+07	1.03937e+07	1.14038e+07	1.03937e+07	0.911424
qe	High	lNVLIR	2	7	N-Term(Dimethyl:2H(6))	1	1		MPT5	0	2	1	381.278	761.55	-2.33355	HCD	0	250	37.1719	10125	qExPlus02_00983.raw	32.77	34	27	8.02465e+06	0.00358	0.1328	9102.34	5.84663e+06	9102.34	5.84663e+06	9102.34	5.84663e+06	642.322
qe_Acetyl	High	mWLSkFQFPSR	1	11	N-Term(Acetyl); K5(Dimethyl:2H(6))	1	1	YGL143C	MRF1	1	2	1	751.908	1502.81	-0.996342	HCD	14.2181	250	72.5232	18697	qExPlus02_00983.raw	50.31	35	28	4.72852e+06	0	0.0005747	19568.4	2.33613e+06	19568.4	2.33613e+06	19568.4	2.33613e+06	119.383
Fusion	Medium	mWLSkFQFPSR	1	11	N-Term(Dimethyl:2H(6)); M1(Oxidation); K5(Dimethyl:2H(6))	1	1	YGL143C	MRF1	1	3	1	504.293	1510.86	1.00187	HCD	10.4491	33.5379	11.6211	6691	Fusion002161.raw	12.03	23	16	1.62471e+07	0.02617	0.2265	3532.53	6.49379e+06	3532.53	6.49379e+06
Fusion	High	mWLSkFQFPSR	1	11	N-Term(Dimethyl:2H(6)); K5(Dimethyl:2H(6))	1	1	YGL143C	MRF1	1	3	1	498.962	1494.87	2.00016	HCD	41.0003	33.298	16.8474	9637	Fusion002161.raw	17.82	24	17	2.9157e+07	0	0.2102	3532.53	12873853	7065.07	1.93676e+07	7065.07	1.93676e+07	2741.33
qe_Acetyl	High	sTFETLIkR	2	10	N-Term(Acetyl); K8(Dimethyl:2H(6))	1	1	YDR033W	MRH1	1	2	1	585.854	1170.7	-0.17639	HCD	7.52502	250	49.0599	12995	qExPlus02_00983.raw	45.07	33	26	2.26772e+06	0.001447	0.02531	3.63414e+06	2.26772e+06	3.63414e+06	2.26772e+06	3.63414e+06	2.26772e+06	0.624006
qe	High	tSLTNAVFkR	2	11	N-Term(Dimethyl:2H(6)); K9(Dimethyl:2H(6))	1	1	YOR201C	MRM1	1	2	1	602.892	1204.78	-2.29406	HCD	0	250	27.3509	6762	qExPlus02_00984.raw	35.8	33	26	3.37735e+06	0	0.00446	9102.34	2.08255e+06	9102.34	2.08255e+06	9102.34	2.08255e+06	228.792
qe_Acetyl	High	tSLTNAVFkR	2	11	N-Term(Acetyl); K9(Dimethyl:2H(6))	1	1	YOR201C	MRM1	1	2	1	606.864	1212.72	-1.43552	HCD	3.49617	204.368	45.0641	12007	qExPlus02_00983.raw	54.67	33	26	40347674	0	0.004999	19568.4	22957616	19568.4	22957616	19568.4	22957616	1173.2
qe	High	mILVYNR	1	7	N-Term(Dimethyl:2H(6))	1	1	YGL136C	MRM2	0	2	1	471.788	942.568	-3.08784	HCD	12.2583	250	35.4301	9676	qExPlus02_00983.raw	27.26	33	26	5.26468e+06	0.002744	0.1134	9102.34	3.61121e+06	9102.34	3.61121e+06	9102.34	3.61121e+06	396.734
qe	High	mLYELIGLVR	1	10	N-Term(Dimethyl:2H(6)); M1(Oxidation)	1	1	YKL003C	MRP17	0	2	1	628.881	1256.75	-0.639257	HCD	2.6915	250	63.0256	16389	qExPlus02_00983.raw	33.83	35	28	7.734e+06	0	0.001416			0	0
qe	High	mLYELIGLVR	1	10	N-Term(Dimethyl:2H(6)); M1(Oxidation)	1	1	YKL003C	MRP17	0	2	1	628.881	1256.75	-0.639257	HCD	28.6568	95.4843	63.3345	16463	qExPlus02_00983.raw	35.78	35	28	2.98812e+07	0	0.003331	9102.34	12978278	9102.34	12978278
qe	High	mLYELIGLVR	1	10	N-Term(Dimethyl); M1(Oxidation)	1	1	YKL003C	MRP17	0	2	1	625.862	1250.72	-0.786897	HCD	0	250	64.042	16675	qExPlus02_00983.raw	39.34	35	28	2.35948e+06	0	0.0006709	2.18439e+06	9102.34	2.19349e+06	1.29874e+07
qe	High	mLYELIGLVR	1	10	N-Term(Dimethyl:2H(6)); M1(Oxidation)	1	1	YKL003C	MRP17	0	2	1	628.881	1256.75	-0.444994	HCD	2.42948	250	68.467	17738	qExPlus02_00983.raw	41.12	35	28	6974404	0	0.006722	9102.34	3.6623e+06	2.2026e+06	1.66497e+07
qe	High	mLYELIGLVR	1	10	N-Term(Dimethyl)	1	1	YKL003C	MRP17	0	2	1	617.864	1234.72	-1.85062	HCD	0	250	68.9533	17852	qExPlus02_00983.raw	40.86	34	27	6.35197e+07	0.001683	0.03077	28143542	9102.34	3.03461e+07	1.66588e+07
qe	High	mLYELIGLVR	1	10	N-Term(Dimethyl); M1(Oxidation)	1	1	YKL003C	MRP17	0	2	1	625.861	1250.71	-2.4461	HCD	7.31048	250	69.0833	17882	qExPlus02_00983.raw	33.48	35	28	4.30613e+06	0	0.004142	2.64426e+06	9102.34	3.29904e+07	1.66679e+07	3.29904e+07	1.66679e+07	0.505234
qe	High	aSVVESSSkILDkSGSDR	35	52	N-Term(Dimethyl); K9(Dimethyl); K13(Dimethyl)	1	1	YDR405W	MRP20	2	3	1	650.358	1949.06	2.44544	HCD	31.1886	250	23.7233	5837	qExPlus02_00984.raw	33.56	36	29	3.19552e+06	0	0.001469	1.04779e+06	9102.34	1.04779e+06	9102.34	1.04779e+06	9102.34	0.00868721
qe_Acetyl	High	mLkSTLR	1	7	N-Term(Acetyl); K3(Dimethyl:2H(6))	1	1	YBL090W	MRP21	1	2	1	462.794	924.581	-1.23992	HCD	43.4976	20.5974	31.5385	8596	qExPlus02_00983.raw	25.3	31	24	216784744	0.002723	0.07956	19568.4	131153064	19568.4	131153064
qe_Acetyl	High	mLkSTLR	1	7	N-Term(Acetyl); M1(Oxidation); K3(Dimethyl:2H(6))	1	1	YBL090W	MRP21	1	2	1	470.791	940.575	-1.91235	HCD	0	244.925	31.5256	8591	qExPlus02_00983.raw	19.3	33	26	2.669e+07	0.001447	0.05747	19568.4	13969953	39136.7	145123017
qe_Acetyl	Medium	mLkSTLR	1	7	N-Term(Acetyl); M1(Oxidation); K3(Dimethyl:2H(6))	1	1	YBL090W	MRP21	1	2	1	470.792	940.576	-1.00387	HCD	30.1684	179.358	22.2153	5523	qExPlus02_00983.raw	8.95	33	26	7.07972e+06	0.04585	0.2826	19568.4	3926276	58705.1	149049293	58705.1	149049293	2538.95
qe	High	mTLAELLGR	1	9	N-Term(Dimethyl:2H(6)); M1(Oxidation)	1	1	YPL118W	MRP51	0	2	1	527.316	1053.62	-0.499784	HCD	55.4892	250	49.556	13113	qExPlus02_00983.raw	42.71	33	26	3.97286e+06	0	0.01801	3.51538e+06	3.97286e+06	3.51538e+06	3.97286e+06
qe	High	mTLAELLGR	1	9	N-Term(Dimethyl:2H(6))	1	1	YPL118W	MRP51	0	2	1	519.318	1037.63	0.00351763	HCD	0	134.329	62.8776	16350	qExPlus02_00983.raw	36.45	34	27	1.82268e+07	0	0.01018	2.11815e+07	1.82268e+07	2.46969e+07	2.21997e+07	2.46969e+07	2.21997e+07	0.898884
qe	Medium	tLAELLGR	2	9	N-Term(Dimethyl)	1	1	YPL118W	MRP51	0	1	1	900.55	900.55	-1.72033	HCD	0	250	42.0457	11289	qExPlus02_00983.raw	29.3	35	28	5.41061e+07	0.02986	0.3271	5.41061e+07	1.40898e+08	5.41061e+07	1.40898e+08	5.41061e+07	1.40898e+08	2.60411
qe	High	tLAELLGR	2	9	N-Term(Dimethyl)	1	1	YPL118W	MRP51	0	2	1	450.778	900.549	-2.88744	HCD	21.4375	77.4536	41.9817	11274	qExPlus02_00983.raw	34.85	37	30	1.1896e+08	0.004135	0.0369	1.1896e+08	310736152	1.1896e+08	310736152
qe	High	tLAELLGR	2	9	N-Term(Dimethyl:2H(6))	1	1	YPL118W	MRP51	0	2	1	453.797	906.587	-2.06287	HCD	25.8468	250	42.4089	11373	qExPlus02_00983.raw	17.98	33	26	392161	0.004334	0.1563	130201	357687	1.1909e+08	3.11094e+08	1.1909e+08	3.11094e+08	2.61226
qe_Acetyl	Medium	tLAELLGR	2	9	N-Term(Acetyl)	1	1	YPL118W	MRP51	0	2	1	457.769	914.53	-0.192272	HCD	33.3785	250	76.235	19559	qExPlus02_00982.raw	22.5	33	26	1.05046e+06	0.01294	0.1173			0	0	0	0
qe	High	mmLTSVAGNDIFFR	29	42	N-Term(Dimethyl:2H(6)); M2(Oxidation)	1	1	YNL284C	MRPL10	0	2	1	826.424	1651.84	-2.40047	HCD	0	250	62.449	16243	qExPlus02_00983.raw	52.07	33	26	1.3049e+06	0	2.439e-05	9102.34	749062	9102.34	749062	9102.34	749062	82.2934
qe	High	mLTSVAGNDIFFR	30	42	N-Term(Dimethyl:2H(6)); M1(Oxidation)	1	1	YNL284C	MRPL10	0	2	1	760.904	1520.8	-2.63543	HCD	25.0048	250	55.072	14467	qExPlus02_00983.raw	80.12	34	27	1.50404e+07	0	7.418e-05	9102.34	11211388	9102.34	11211388
qe	High	mLTSVAGNDIFFR	30	42	N-Term(Dimethyl:2H(6))	1	1	YNL284C	MRPL10	0	2	1	752.907	1504.81	-2.63557	HCD	5.50241	250	59.0732	15451	qExPlus02_00983.raw	69.94	34	27	3.99012e+07	0	0.0007356	9102.34	17502548	18204.7	28713936
qe	High	mLTSVAGNDIFFR	30	42	N-Term(Dimethyl:2H(6)); M1(Oxidation)	1	1	YNL284C	MRPL10	0	2	1	760.905	1520.8	-1.91303	HCD	14.6817	250	59.1592	15472	qExPlus02_00983.raw	79.71	34	27	8.38022e+06	0	0.0001825	9102.34	4444344	27307	33158280	27307	33158280	1214.28
qe	High	aLASEQPSR	32	40	N-Term(Dimethyl)	1	1	YDL202W	MRPL11	0	2	1	493.766	986.525	-1.1114	HCD	0	250	11.8392	2853	qExPlus02_00983.raw	31.93	34	27	5.82532e+06	0.001683	0.03375	5.82532e+06	6.61063e+06	5.82532e+06	6.61063e+06	5.82532e+06	6.61063e+06	1.13481
qe	High	dFmSWFkR	38	45	N-Term(Dimethyl:2H(6)); M3(Oxidation); K7(Dimethyl:2H(6))	1	1	YKR006C	MRPL13	1	2	1	600.835	1200.66	0.856983	HCD	9.37188	250	46.8562	11846	qExPlus02_00984.raw	25.85	33	26	298395	0	0.04268	9102.34	202875	9102.34	202875
qe	Medium	dFmSWFkR	38	45	N-Term(Dimethyl); M3(Oxidation); K7(Dimethyl)	1	1	YKR006C	MRPL13	1	2	1	594.797	1188.59	0.561468	HCD	0	250	46.9795	11875	qExPlus02_00984.raw	39.54	33	26	738928	0.02523	0.2962	738928	2.43685e+06	748030	2.63973e+06
qe	Medium	dFmSWFkR	38	45	N-Term(Dimethyl:2H(6)); M3(Oxidation); K7(Dimethyl:2H(6))	1	1	YKR006C	MRPL13	1	2	1	600.836	1200.66	1.71175	HCD		250	47.1149	11907	qExPlus02_00984.raw	14.64	34	27	305243	0.03266	0.3447	3.83238e+06	305243	4.58041e+06	2.94497e+06
qe	High	dFmSWFkR	38	45	N-Term(Dimethyl); M3(Oxidation); K7(Dimethyl)	1	1	YKR006C	MRPL13	1	2	1	594.796	1188.58	-2.21149	HCD	2.98586	74.8811	47.2413	11938	qExPlus02_00984.raw	37.73	33	26	1.4196e+07	0.005141	0.07512	11897429	2.45549e+06	1.64778e+07	5.40046e+06
qe	High	dFMSWFkR	38	45	N-Term(Dimethyl:2H(6)); K7(Dimethyl:2H(6))	1	1	YKR006C	MRPL13	1	2	1	592.837	1184.67	-0.0234098	HCD	14.2954	250	58.1575	14607	qExPlus02_00984.raw	27.98	34	27	1.56393e+06	0	0.06064	9102.34	676460	1.64869e+07	6.07692e+06
qe	High	dFMSWFkR	38	45	N-Term(Dimethyl); K7(Dimethyl)	1	1	YKR006C	MRPL13	1	2	1	586.799	1172.59	-0.644331	HCD	15.3739	250	58.3131	14644	qExPlus02_00984.raw	46.46	34	27	3.5175e+06	0.0008655	0.01624	3.5175e+06	1.14589e+06	20004448	7.2228e+06	20004448	7.2228e+06	0.36106
qe_Acetyl	Medium	mMFISR	5	10	N-Term(Acetyl)	1	1	YLR312W-A	MRPL15	0	2	1	413.7	826.392	-3.45489	HCD	16.0181	250	70.5136	18171	qExPlus02_00982.raw	27.24	32	25	1.42526e+07	0.03047	0.2554			0	0
qe_Acetyl	Medium	mmFISR	5	10	N-Term(Acetyl); M2(Oxidation)	1	1	YLR312W-A	MRPL15	0	2	1	421.698	842.388	-2.49719	HCD	40.9709	250	70.5937	18191	qExPlus02_00982.raw	30.24	31	24	3.07184e+06	0.02757	0.187			0	0	0	0
qe	High	mFPYLTR	1	7	N-Term(Dimethyl:2H(6))	1	1	YBL038W	MRPL16	0	2	1	481.275	961.543	-2.13949	HCD	5.80124	227.001	44.3303	11830	qExPlus02_00983.raw	28.11	33	26	2.85711e+06	0.001946	0.08397	9102.34	2.07453e+06	9102.34	2.07453e+06	9102.34	2.07453e+06	227.912
qe_Acetyl	High	mFPYLTR	1	7	N-Term(Acetyl)	1	1	YBL038W	MRPL16	0	2	1	485.246	969.484	-1.88525	HCD	0	250	74.6635	19182	qExPlus02_00982.raw	20.48	33	26	1.90885e+07	0.005022	0.09056			0	0
qe_Acetyl	High	mFPYLTR	1	7	N-Term(Acetyl); M1(Oxidation)	1	1	YBL038W	MRPL16	0	2	1	493.244	985.48	-0.782401	HCD	43.2252	250	74.8842	19235	qExPlus02_00982.raw	34.93	33	26	1.14061e+06	0.002723	0.06562			0	0
qe_Acetyl	Medium	mFPYLTR	1	7	N-Term(Acetyl); M1(Oxidation)	1	1	YBL038W	MRPL16	0	2	1	493.243	985.478	-3.01204	HCD	0	250	61.81	16043	qExPlus02_00982.raw	44.51	33	26	1.45519e+07	0.04293	0.2657			0	0	0	0
qe_Acetyl	High	mNFHTAR	1	7	N-Term(Acetyl)	1	1	YNL177C	MRPL22	0	2	1	459.715	918.424	-1.6741	HCD	0	95.8197	24.2037	6064	qExPlus02_00983.raw	27.35	33	26	94214062	0.00508	0.09213			0	0
qe_Acetyl	High	mNFHTAR	1	7	N-Term(Acetyl); M1(Oxidation)	1	1	YNL177C	MRPL22	0	2	1	467.713	934.418	-1.75566	HCD	5.33617	201.273	24.3553	6108	qExPlus02_00983.raw	24.27	32	25	8.70393e+06	0.002723	0.0723			0	0
qe_Acetyl	Medium	mNFHTAR	1	7	N-Term(Acetyl); M1(Oxidation)	1	1	YNL177C	MRPL22	0	2	1	467.713	934.418	-2.14757	HCD	0	250	13.3784	3239	qExPlus02_00983.raw	40.7	32	25	8.49203e+06	0.01213	0.1128			0	0	0	0
qe_Acetyl	High	sQkIGHSGLAFAR	2	14	N-Term(Acetyl); K3(Dimethyl:2H(6))	1	1	YOR150W	MRPL23	1	2	1	724.415	1447.82	-3.80989	HCD	0	250	27.9402	6922	qExPlus02_00984.raw	40.83	34	27	722853	0	0.005359			0	0
qe_Acetyl	High	sQkIGHSGLAFAR	2	14	N-Term(Acetyl); K3(Dimethyl:2H(6))	1	1	YOR150W	MRPL23	1	2	1	724.417	1447.83	-0.690318	HCD	0	250	26.8347	6632	qExPlus02_00984.raw	50.26	35	28	2.01043e+06	0	0.0002322		1.06352e+06	0	1.06352e+06
qe_Acetyl	High	sQkIGHSGLAFAR	2	14	N-Term(Acetyl); K3(Dimethyl)	1	1	YOR150W	MRPL23	1	2	1	721.4	1441.79	1.80603	HCD	3.97196	97.7763	26.5912	6575	qExPlus02_00984.raw	49.14	35	28	59478432	0	0.06025	59478432	1.11754e+08	59478432	1.12818e+08
qe_Acetyl	Medium	sQkIGHSGLAFAR	2	14	N-Term(Acetyl); K3(Dimethyl)	1	1	YOR150W	MRPL23	1	2	1	721.397	1441.79	-2.93525	HCD	57.5101	250	26.8538	6636	qExPlus02_00984.raw	55.7	35	28	847089	0.01654	0.1842			59478432	1.12818e+08	59478432	1.12818e+08	1.89679
qe_Acetyl	High	sQkIGHSGLAFAR	2	14	N-Term(Acetyl); K3(Dimethyl:2H(6))	1	1	YOR150W	MRPL23	1	3	1	483.281	1447.83	-0.720684	HCD	0	250	26.6228	6583	qExPlus02_00984.raw	42.58	35	28	339532	0.001447	0.02398	4.57699e+06	339532	4.57699e+06	339532
qe_Acetyl	High	sQkIGHSGLAFAR	2	14	N-Term(Acetyl); K3(Dimethyl)	1	1	YOR150W	MRPL23	1	3	1	481.269	1441.79	0.188056	HCD	0	250	26.564	6568	qExPlus02_00984.raw	48.71	35	28	1.12471e+07	0.006948	0.1016	1.12471e+07	20040533	1.58241e+07	2.03801e+07	1.58241e+07	2.03801e+07	1.28791
qe_Acetyl	High	mQkIFRPFQLTR	1	12	N-Term(Acetyl); K3(Dimethyl:2H(6))	1	1	YMR193W	MRPL24	1	2	1	820.981	1640.95	-1.65017	HCD	0	250	53.6377	13523	qExPlus02_00984.raw	21.37	33	26	8.50575e+06	0.001447	0.05646	19568.4	3.34548e+06	19568.4	3.34548e+06	19568.4	3.34548e+06	170.964
qe_Acetyl	High	mQkIFRPFQLTR	1	12	N-Term(Acetyl); M1(Oxidation); K3(Dimethyl:2H(6))	1	1	YMR193W	MRPL24	1	3	1	552.989	1656.95	-0.341591	HCD	4.25864	250	53.7479	13549	qExPlus02_00984.raw	5.22	34	27	2.15006e+06	0.003945	0.08374	19568.4	992086	19568.4	992086	19568.4	992086	50.6984
Fusion_Acetyl	High	mQkIFRPFQLTR	1	12	N-Term(Acetyl); K3(Dimethyl:2H(6))	1	1	YMR193W	MRPL24	1	3	1	547.658	1640.96	1.72636	ETD	9.95762	50	21.8446	12364	Fusion002161.raw	63.17	33	26	4.77855e+07	0	0.001328	2297.14	18815232	2297.14	18815232
Fusion_Acetyl	High	mQkIFRPFQLTR	1	12	N-Term(Acetyl); M1(Oxidation); K3(Dimethyl:2H(6))	1	1	YMR193W	MRPL24	1	3	1	552.992	1656.96	5.40479	ETD	7.3098	50	9.01166	5216	Fusion002161.raw	41.13	34	27	8.86891e+07	0	0.1608		35101748	2297.14	53916980	2297.14	53916980	23471.4
qe	High	gGLLWkIPWR	13	22	N-Term(Dimethyl); K6(Dimethyl)	1	1	YKL138C	MRPL31	1	2	1	641.395	1281.78	-0.965936	HCD	32.7966	250	54.6457	13763	qExPlus02_00984.raw	54.57	31	24	2.18532e+06	0	0.006156	2.18532e+06	5.47272e+06	2.18532e+06	5.47272e+06
qe	High	gGLLWkIPWR	13	22	N-Term(Dimethyl:2H(6)); K6(Dimethyl:2H(6))	1	1	YKL138C	MRPL31	1	2	1	647.432	1293.86	-0.677451	HCD	12.4573	250	54.8451	13810	qExPlus02_00984.raw	66.86	32	25	2.01059e+06	0	0.0002307	3.37847e+06	2.01059e+06	5.5638e+06	7.48331e+06
qe	High	gGLLWkIPWR	13	22	N-Term(Dimethyl); K6(Dimethyl)	1	1	YKL138C	MRPL31	1	2	1	641.394	1281.78	-2.48969	HCD	0	250	55.0414	13857	qExPlus02_00984.raw	36.69	31	24	1.80444e+06	0	0.004963	1.62499e+06	1.63908e+06	7.18879e+06	9.12239e+06	7.18879e+06	9.12239e+06	1.26897
Fusion	High	mVFYkVTLSR	1	10	N-Term(Dimethyl:2H(6)); K5(Dimethyl:2H(6))	1	1	YMR286W	MRPL33	1	3	1	437.947	1311.82	0.222779	ETD	48.8974	50	4.25428	2467	Fusion002161.raw	50.88	23	16	1.01981e+07	0	0.008352	4.6749e+06	1.01981e+07	4.6749e+06	1.01981e+07	4.6749e+06	1.01981e+07	2.18147
qe	High	vFYkVTLSR	2	10	N-Term(Dimethyl:2H(6)); K4(Dimethyl:2H(6))	1	1	YMR286W	MRPL33	1	2	1	590.894	1180.78	-3.26643	HCD	5.64442	250	29.5281	7331	qExPlus02_00984.raw	30.86	32	25	1.0239e+08	0	0.03734	29526111	100160107	29526111	100160107
qe	Medium	vFYkVTLSR	2	10	N-Term(Dimethyl); K4(Dimethyl)	1	1	YMR286W	MRPL33	1	2	1	584.857	1168.71	-1.5206	HCD	17.8004	30.7739	29.8627	7421	qExPlus02_00984.raw	22.58	33	26	3.28083e+07	0.01252	0.1737	3.24698e+07	3.16813e+07	6.1996e+07	1.31841e+08	6.1996e+07	1.31841e+08	2.12661
Fusion_Acetyl	High	mLkSIFAkR	1	9	N-Term(Acetyl); K3(Dimethyl:2H(6)); K8(Dimethyl:2H(6))	1	1	YBR122C	MRPL36	2	3	1	401.94	1203.8	0.378509	ETD	8.84833	50	11.3406	6535	Fusion002161.raw	39.87	29	22	6.69995e+07	0	0.004428	2297.14	35439296	2297.14	35439296	2297.14	35439296	15427.6
qe	High	sGSYQHLSNVGSR	2	14	N-Term(Dimethyl:2H(6))	1	1	YPL173W	MRPL40	0	2	1	713.371	1425.73	-0.44347	HCD	21.2717	250	13.9731	3365	qExPlus02_00984.raw	18.04	33	26	244199	0	0.02701		225556	0	225556	0	225556
qe_Acetyl	High	sGSYQHLSNVGSR	2	14	N-Term(Acetyl)	1	1	YPL173W	MRPL40	0	2	1	717.341	1433.67	-2.11155	HCD	0	6.36471	24.1023	6032	qExPlus02_00983.raw	78.76	32	25	9.49188e+08	0	4.595e-06			0	0	0	0
qe	High	mLQLkFIWPVAR	1	12	N-Term(Dimethyl:2H(6)); K5(Dimethyl:2H(6))	1	1	YJL096W	MRPL49	1	2	1	785.508	1570.01	-0.56236	HCD	11.6052	250	63.5475	15885	qExPlus02_00984.raw	62.06	33	26	1.28706e+06	0	1.218e-05	9102.34	855660	9102.34	855660	9102.34	855660	94.0044
Fusion	High	mLQLkFIWPVAR	1	12	N-Term(Dimethyl:2H(6)); K5(Dimethyl:2H(6))	1	1	YJL096W	MRPL49	1	3	1	524.008	1570.01	-0.493173	HCD	16.9992	34.453	34.7545	18790	Fusion002161.raw	30.6	23	16	1.55431e+07	0	0.01187	3532.53	6415212	3532.53	6415212
Fusion	High	mLQLkFIWPVAR	1	12	N-Term(Dimethyl:2H(6)); M1(Oxidation); K5(Dimethyl:2H(6))	1	1	YJL096W	MRPL49	1	3	1	529.341	1586.01	2.91039	HCD	10.3943	58.7965	30.5745	16875	Fusion002161.raw	42.2	22	15	1.50779e+07	0	0.02372	3532.53	5.93001e+06	7065.07	1.23452e+07
Fusion	High	mLQLkFIWPVAR	1	12	N-Term(Dimethyl:2H(6)); M1(Oxidation); K5(Dimethyl:2H(6))	1	1	YJL096W	MRPL49	1	3	1	529.339	1586	-1.13039	ETD	12.9931	50	31.1616	17140	Fusion002161.raw	26.13	21	14	292800	0	0.273	3532.53	122541	10597.6	1.24678e+07	10597.6	1.24678e+07	1176.47
qe	High	tVGIAR	2	7	N-Term(Dimethyl:2H(6))	1	1	YJL063C	MRPL8	0	1	1	650.446	650.446	-0.831648	HCD	0	250	13.7503	3329	qExPlus02_00983.raw	15.03	35	28	3.92978e+06	0.005861	0.1906	2.801e+06	3.92978e+06	2.801e+06	3.92978e+06	2.801e+06	3.92978e+06	1.40299
qe	Medium	tVGIAR	2	7	N-Term(Dimethyl:2H(6))	1	1	YJL063C	MRPL8	0	2	1	325.726	650.446	-1.60301	HCD	9.38336	122.84	13.7782	3336	qExPlus02_00983.raw	19.46	35	28	5.6783e+06	0.0347	0.3514		4.52846e+06	0	4.52846e+06	0	4.52846e+06
qe	High	nSITTEAPAINHSPELANAR	33	52	N-Term(Dimethyl)	1	1	YGR220C	MRPL9	0	3	1	712.033	2134.08	-1.88851	HCD	0	250	38.4814	9167	qExPlus02_00989.raw	82.91	36	29	9.3526e+06	0	1.797e-05	2.61859e+06		2.61859e+06	0	2.61859e+06	0
qe	Medium	aTLNQIkR	29	36	N-Term(Dimethyl:2H(6)); K7(Dimethyl:2H(6))	1	1	YNR036C	MRPS12	1	2	1	506.355	1011.7	-3.05371	HCD	0	250	12.9617	3125	qExPlus02_00984.raw	30.97	34	27	9.70923e+06	0.02313	0.2869	9102.34	6254426	9102.34	6254426	9102.34	6254426	687.123
qe	High	mLLQPVWkGcR	1	11	N-Term(Dimethyl:2H(6)); M1(Oxidation); K8(Dimethyl:2H(6)); C10(Carbamidomethyl)	1	1	YNL306W	MRPS18	1	2	1	736.437	1471.87	-0.0286256	HCD	16.1341	250	33.8309	8565	qExPlus02_00984.raw	54.02	35	28	4.49452e+06	0	0.004211	9102.34	1.54521e+06	9102.34	1.54521e+06
qe	High	mLLQPVWkGcR	1	11	N-Term(Dimethyl:2H(6)); K8(Dimethyl:2H(6)); C10(Carbamidomethyl)	1	1	YNL306W	MRPS18	1	2	1	728.437	1455.87	-3.354	HCD	0	185.884	39.1095	9957	qExPlus02_00984.raw	49.55	35	28	4.49544e+06	0	0.006706	9102.34	1.76794e+06	18204.7	3.31315e+06
qe	High	mLLQPVWkGcR	1	11	N-Term(Dimethyl:2H(6)); K8(Dimethyl:2H(6)); C10(Carbamidomethyl)	1	1	YNL306W	MRPS18	1	2	1	728.437	1455.87	-3.01861	HCD	3.31224	151.34	39.494	10056	qExPlus02_00984.raw	32.62	35	28	1.17986e+07	0	0.003535	9102.34	5072471	27307	8.38562e+06	27307	8.38562e+06	307.087
Fusion	High	mLLQPVWkGcR	1	11	N-Term(Dimethyl:2H(6)); K8(Dimethyl:2H(6)); C10(Carbamidomethyl)	1	1	YNL306W	MRPS18	1	2	1	728.438	1455.87	-1.84476	HCD	23.3455	32.6979	4.88581	2833	Fusion002161.raw	44.48	23	16	8.83725e+06	0	0.00774	3532.53	5.13048e+06	3532.53	5.13048e+06	3532.53	5.13048e+06	1452.35
Fusion	High	mLLQPVWkGcR	1	11	N-Term(Dimethyl:2H(6)); K8(Dimethyl:2H(6)); C10(Carbamidomethyl)	1	1	YNL306W	MRPS18	1	3	1	485.962	1455.87	0.451798	HCD	10.9088	32.7129	5.35994	3104	Fusion002161.raw	26.82	22	15	4.02903e+08	0	0.06547	3532.53	174444320	3532.53	174444320	3532.53	174444320	49382.2
qe	High	sYGLTGTSSkLR	2	13	N-Term(Dimethyl:2H(6)); K10(Dimethyl:2H(6))	1	1	YGR165W	MRPS35	1	2	1	669.411	1337.81	-2.18112	HCD	0	226.132	20.8926	5108	qExPlus02_00984.raw	42.78	34	27	4.53165e+06	0	0.0002092	9102.34	2.4684e+06	9102.34	2.4684e+06	9102.34	2.4684e+06	271.184
qe_Acetyl	High	sYGLTGTSSkLR	2	13	N-Term(Acetyl); K10(Dimethyl:2H(6))	1	1	YGR165W	MRPS35	1	2	1	673.382	1345.76	-2.58731	HCD	0	159.012	31.9466	8710	qExPlus02_00983.raw	68.14	34	27	2.72094e+07	0	0.0009366	19568.4	14029835	19568.4	14029835	19568.4	14029835	716.965
qe	High	qHYDESLLSR	14	23	N-Term(Dimethyl)	1	1	YBR251W	MRPS5	0	2	1	638.319	1275.63	-1.57224	HCD	0	250	23.6618	5821	qExPlus02_00984.raw	26.62	34	27	3.71685e+06	0.004844	0.04004	2.51116e+06		2.51116e+06	0	2.51116e+06	0
qe_Acetyl	Medium	sLVkLAN	2	8	N-Term(Acetyl); K4(Dimethyl:2H(6))	1	1	YMR158W	MRPS8	1	2	1	410.773	820.538	-3.34767	HCD	0	250	50.9463	13301	qExPlus02_00982.raw	23.93	32	25	3.95864e+07	0.02487	0.1637	2.76042e+07	3.95864e+07	2.76042e+07	3.95864e+07	2.76042e+07	3.95864e+07	1.43407
qe	High	iYQkTEDELPR	25	35	N-Term(Dimethyl:2H(6)); K4(Dimethyl:2H(6))	1	1	YBR146W	MRPS9	1	2	1	730.429	1459.85	-3.11063	HCD	27.2983	250	20.2242	4938	qExPlus02_00984.raw	70.35	35	28	10684473	0	6.179e-05			0	0
qe	High	iYQkTEDELPR	25	35	N-Term(Dimethyl); K4(Dimethyl)	1	1	YBR146W	MRPS9	1	2	1	724.392	1447.78	-1.95297	HCD	0	50.7219	20.3353	4966	qExPlus02_00984.raw	70.88	36	29	8.12404e+07	0	9.551e-05			0	0
qe	High	iYQkTEDELPR	25	35	N-Term(Dimethyl:2H(6)); K4(Dimethyl:2H(6))	1	1	YBR146W	MRPS9	1	2	1	730.428	1459.85	-3.52872	HCD	14.0667	250	20.669	5053	qExPlus02_00984.raw	31.66	35	28	1.45152e+06	0	0.001382	2.22524e+06	1.45152e+06	2.22524e+06	1.45152e+06	2.22524e+06	1.45152e+06	0.6523
qe	High	iYQkTEDELPR	25	35	N-Term(Dimethyl); K4(Dimethyl)	1	1	YBR146W	MRPS9	1	3	1	483.264	1447.78	-0.507811	HCD	12.8826	250	20.1289	4912	qExPlus02_00984.raw	20.26	36	29	2.36078e+07	0.008862	0.1415	2.27305e+07	1.57117e+07	2.27305e+07	1.57117e+07
qe	Medium	iYQkTEDELPR	25	35	N-Term(Dimethyl); K4(Dimethyl)	1	1	YBR146W	MRPS9	1	3	1	483.263	1447.78	-2.53138	HCD	30.7931	250	20.3953	4982	qExPlus02_00984.raw	13.18	36	29	1.97434e+06	0.01934	0.2693	1.48682e+06		2.42173e+07	1.57117e+07	2.42173e+07	1.57117e+07	0.648779
qe	High	aDTSTAANTNSTILR	33	47	N-Term(Dimethyl)	1	1	YOR334W	MRS2	0	2	1	782.402	1563.8	-0.780992	HCD	0	223.787	26.5216	6854	qExPlus02_00983.raw	89.91	35	28	2.06499e+07	0	7.449e-06	17976358	5.21863e+06	17976358	5.21863e+06	17976358	5.21863e+06	0.290305
qe	High	nSDSVFDkWTQEDLADYLR	23	41	N-Term(Dimethyl); K8(Dimethyl)	1	1	YML128C	MSC1	1	2	1	1179.56	2358.12	-1.87511	HCD	0	250	66.0609	16485	qExPlus02_00984.raw	70.74	34	27	4.68156e+06	0	7.159e-06	4.68156e+06	5.83687e+06	4.68156e+06	5.83687e+06	4.68156e+06	5.83687e+06	1.24678
qe	High	nSDSVFDkWTQEDLADYLR	23	41	N-Term(Dimethyl:2H(6)); K8(Dimethyl:2H(6))	1	1	YML128C	MSC1	1	3	1	790.737	2370.2	-1.87318	HCD	5.90944	250	66.1558	16507	qExPlus02_00984.raw	49.17	34	27	3.11872e+07	0	0.0005527	2.08469e+07	3.11872e+07	2.08469e+07	3.11872e+07
qe	High	nSDSVFDkWTQEDLADYLR	23	41	N-Term(Dimethyl:2H(6)); K8(Dimethyl:2H(6))	1	1	YML128C	MSC1	1	3	1	790.737	2370.2	-1.95044	HCD	13.4068	250	66.4173	16569	qExPlus02_00984.raw	55.07	34	27	246948	0	0.0008692	116885	246948	2.09638e+07	3.14342e+07	2.09638e+07	3.14342e+07	1.49945
qe_Acetyl	High	mLSHNALR	1	8	N-Term(Acetyl); M1(Oxidation)	1	1	YOR354C	MSC6	0	2	1	500.255	999.502	-1.65987	HCD	21.0873	119.136	20.6131	5103	qExPlus02_00983.raw	27.64	33	26	9.22904e+06	0.005022	0.07647			0	0
qe_Acetyl	High	mLSHNALR	1	8	N-Term(Acetyl)	1	1	YOR354C	MSC6	0	2	1	492.258	983.509	-0.527153	HCD	35.2191	79.5908	29.7937	8031	qExPlus02_00983.raw	22.67	33	26	5.39848e+06	0.006155	0.1055			0	0
qe_Acetyl	Medium	mLSHNALR	1	8	N-Term(Acetyl); M1(Oxidation)	1	1	YOR354C	MSC6	0	2	1	500.257	999.507	2.55365	HCD	31.486	70.986	29.8563	8052	qExPlus02_00983.raw	21.66	34	27	2.87689e+06	0.01654	0.1531			0	0	0	0
qe_Acetyl	High	mNVLLkR	1	7	N-Term(Acetyl); M1(Oxidation); K6(Dimethyl:2H(6))	1	1	YNL073W	MSK1	1	2	1	483.307	965.606	-2.07133	HCD	12.8309	250	46.2071	12285	qExPlus02_00983.raw	21.39	31	24	710431	0.001447	0.06294	19568.4	557645	19568.4	557645
qe_Acetyl	High	mNVLLkR	1	7	N-Term(Acetyl); K6(Dimethyl:2H(6))	1	1	YNL073W	MSK1	1	2	1	475.31	949.612	-1.16221	HCD	40.8483	250	46.0843	12256	qExPlus02_00983.raw	22.83	31	24	5.81045e+06	0.001447	0.05633	19568.4	3620335	39136.7	4.17798e+06	39136.7	4.17798e+06	106.753
Fusion	Medium	mFGIVYLkNR	1	10	N-Term(Dimethyl:2H(6)); M1(Oxidation); K8(Dimethyl:2H(6))	1	1	YHR091C	MSR1	1	3	1	442.277	1324.82	-1.49165	HCD	27.7192	30.7479	1.37948	787	Fusion002161.raw	15.89	23	16	5.40614e+06	0.02958	0.298	3532.53	2333352	3532.53	2333352
Fusion	High	mFGIVYLkNR	1	10	N-Term(Dimethyl:2H(6)); K8(Dimethyl:2H(6))	1	1	YHR091C	MSR1	1	3	1	436.946	1308.82	-0.871588	HCD	33.1644	30.508	7.55298	4376	Fusion002161.raw	31.77	21	14	1.28131e+07	0	0.02261	3532.53	6558828	7065.07	8892180	7065.07	8892180	1258.61
qe_Acetyl	High	mNSASFLQSR	1	10	N-Term(Acetyl)	1	1	YMR023C	MSS1	0	2	1	591.78	1182.55	-2.99925	HCD	31.3134	250	55.3608	14420	qExPlus02_00982.raw	60.89	34	27	3.69393e+06	0	0.01628			0	0	0	0
qe_Acetyl	High	mLTSILIkGR	1	10	N-Term(Acetyl); K8(Dimethyl:2H(6))	1	1	YDR194C	MSS116	1	2	1	604.39	1207.77	0.6544	HCD	8.01638	250	65.2229	16975	qExPlus02_00983.raw	60.13	30	23	1.04585e+07	0	0.0136	19568.4	5095899	19568.4	5095899	19568.4	5095899	260.415
Fusion	High	mLTSILIkGR	1	10	N-Term(Dimethyl:2H(6)); K8(Dimethyl:2H(6))	1	1	YDR194C	MSS116	1	3	1	400.615	1199.83	-0.357667	HCD	13.2535	53.3403	1.09392	621	Fusion002161.raw	34.89	19	13	9.12318e+07	0	0.02719		50909388	0	50909388	0	50909388
qe	High	gLPEVNFLR	2	10	N-Term(Dimethyl:2H(6))	1	1	YPR134W	MSS18	0	2	1	539.83	1078.65	0.130542	HCD	28.7362	250	53.2459	14038	qExPlus02_00983.raw	32.45	34	27	8.39024e+06	0	0.03133	4.77593e+06	8.39024e+06	4.77593e+06	8.39024e+06	4.77593e+06	8.39024e+06	1.75678
qe	High	tVLYAPSGATQLYFHLLR	2	19	N-Term(Dimethyl:2H(6))	1	1	YLR203C	MSS51	0	3	1	695.397	2084.18	-2.65519	HCD	46.4392	250	63.941	15980	qExPlus02_00984.raw	75.97	36	29	1.57424e+06	0	2.129e-06	9102.34	646894	9102.34	646894	9102.34	646894	71.069
Fusion	High	tVLYAPSGATQLYFHLLR	2	19	N-Term(Dimethyl:2H(6))	1	1	YLR203C	MSS51	0	3	1	695.397	2084.18	-2.74304	HCD	36.3749	54.6844	34.1172	18510	Fusion002161.raw	85.3	24	17	7.2623e+07	0	1.06836e-05		21684090	0	21684090	0	21684090
qe	High	lMGFVR	36	41	N-Term(Dimethyl:2H(6))	1	1	YLR203C	MSS51	0	1	1	756.471	756.471	0.175883	HCD	0	250	33.4991	9188	qExPlus02_00983.raw	29.23	33	26	2.56675e+07	0.001946	0.08896	9102.34	17255946	9102.34	17255946	9102.34	17255946	1895.77
qe	High	mkIQLVR	1	7	N-Term(Dimethyl:2H(6)); K2(Dimethyl:2H(6))	1	1	YKL194C	MST1	1	2	1	478.347	955.686	-1.48505	HCD	8.46912	250	25.1199	6202	qExPlus02_00984.raw	12.12	31	24	2.11487e+06	0.001946	0.07832	9102.34	1.54103e+06	9102.34	1.54103e+06	9102.34	1.54103e+06	169.301
qe	High	sQPSALEVQGTSDSR	38	52	N-Term(Dimethyl)	1	1	YPL097W	MSY1	0	2	1	795.391	1589.77	-1.46967	HCD	0	64.2725	24.7331	6229	qExPlus02_00983.raw	87.12	34	27	5.5567e+08	0	1.046e-08	5.5567e+08	4.40723e+08	5.5567e+08	4.40723e+08
qe	High	sQPSALEVQGTSDSR	38	52	N-Term(Dimethyl:2H(6))	1	1	YPL097W	MSY1	0	2	1	798.408	1595.81	-3.33966	HCD	0	250	25.3203	6449	qExPlus02_00983.raw	52.63	33	26	14293646	0	0.001428	3.19017e+07	14293646	587571425	4.55017e+08	587571425	4.55017e+08	0.774403
Fusion	High	fEGSPLQILkR	90	100	N-Term(Dimethyl:2H(6)); K10(Dimethyl:2H(6))	1	1	YMR228W	MTF1	1	3	1	452.631	1355.88	-0.00977248	HCD	22.0022	31.2279	8.00042	4634	Fusion002161.raw	29.65	23	16	4.94776e+06	0	0.02331	3532.53	2.53843e+06	3532.53	2.53843e+06	3532.53	2.53843e+06	718.587
qe_Acetyl	High	sIAWSSVFkR	2	11	N-Term(Acetyl); K9(Dimethyl:2H(6))	1	1	YHR168W	MTG2	1	2	1	628.867	1256.73	-0.380856	HCD	0	250	58.4824	15303	qExPlus02_00983.raw	39.91	33	26	6.44992e+06	0	0.009764	19568.4	2.54711e+06	19568.4	2.54711e+06	19568.4	2.54711e+06	130.165
Fusion	High	lTISSLTSFQPTTkTQVVVIGAGHAGcEAAAASSR	23	57	N-Term(Dimethyl); K14(Dimethyl); C27(Carbamidomethyl)	1	1	YGL236C	MTO1	1	4	1	893.973	3572.87	-1.07638	ETD	1.65917	50	20.7702	11798	Fusion002161.raw	31.7	23	16	4.31332e+07	0	0.2144	4.29699e+07	3.31726e+07	4.29699e+07	3.31726e+07	4.29699e+07	3.31726e+07	0.771996
qe	High	aLAGTAYVSYSLYR	79	92	N-Term(Dimethyl:2H(6))	1	1	YMR145C	NDE1	0	2	1	784.935	1568.86	2.14923	HCD	32.6419	250	49.3115	13054	qExPlus02_00983.raw	14.68	35	28	597996	0	0.01385	842661	597996	842661	597996	842661	597996	0.709652
qe_Acetyl	High	mLkSTATR	1	8	N-Term(Acetyl); M1(Oxidation); K3(Dimethyl:2H(6))	1	1	YCL017C	NFS1	1	2	1	500.292	999.577	-0.146631	HCD	0	250	14.1207	3418	qExPlus02_00983.raw	13.79	34	27	1559676	0.001447	0.03111	19568.4	1.04367e+06	19568.4	1.04367e+06
qe_Acetyl	High	mLkSTATR	1	8	N-Term(Acetyl); K3(Dimethyl:2H(6))	1	1	YCL017C	NFS1	1	2	1	492.295	983.583	0.328016	HCD	12.0782	250	20.765	5143	qExPlus02_00983.raw	27.13	34	27	1.50359e+08	0.001447	0.03078	19568.4	89221552	39136.7	9.02652e+07
qe_Acetyl	Medium	mLkSTATR	1	8	N-Term(Acetyl); M1(Oxidation); K3(Dimethyl:2H(6))	1	1	YCL017C	NFS1	1	2	1	500.293	999.578	0.830345	HCD	47.7333	189.789	20.7762	5146	qExPlus02_00983.raw	3.88	34	27	77746863	0.01294	0.126	19568.4	46505184	58705.1	1.3677e+08
qe_Acetyl	Medium	mLkSTATR	1	8	N-Term(Acetyl); K3(Dimethyl:2H(6))	1	1	YCL017C	NFS1	1	2	1	492.294	983.58	-2.2162	HCD	21.6305	250	21.3303	5290	qExPlus02_00983.raw	13.82	34	27	645469	0.01294	0.1197	19568.4	456090	78273.4	1.37227e+08
qe_Acetyl	Medium	mLkSTATR	1	8	N-Term(Acetyl); M1(Oxidation); K3(Dimethyl:2H(6))	1	1	YCL017C	NFS1	1	2	1	500.292	999.576	-1.61209	HCD	0	250	13.8616	3356	qExPlus02_00983.raw	21.35	34	27	2.08118e+06	0.01487	0.1314	19568.4	1.27908e+06	97841.8	1.38506e+08
qe_Acetyl	Medium	mLkSTATR	1	8	N-Term(Acetyl); M1(Oxidation); K3(Dimethyl:2H(6))	1	1	YCL017C	NFS1	1	2	1	500.293	999.578	0.769284	HCD	4.05118	250	14.3713	3480	qExPlus02_00983.raw	14.64	34	27	1.04225e+06	0.02654	0.1782	19568.4	644266	117410	1.3915e+08
qe_Acetyl	Medium	mLkSTATR	1	8	N-Term(Acetyl); M1(Oxidation); K3(Dimethyl:2H(6))	1	1	YCL017C	NFS1	1	2	1	500.292	999.577	-0.268752	HCD	24.7759	250	12.7926	3098	qExPlus02_00983.raw	13.38	34	27	5.97756e+07	0.04646	0.286	19568.4	35368904	136979	1.74519e+08	136979	1.74519e+08	1274.06
qe	High	mHYLPVAIVTGATR	1	14	N-Term(Dimethyl); M1(Oxidation)	1	1	YKL055C	OAR1	0	2	1	786.931	1572.86	-0.95965	HCD	42.6082	99.1181	43.0433	10938	qExPlus02_00984.raw	17.28	37	30	1.69017e+06	0	0.0006509	1.10415e+06	9102.34	1.10415e+06	9102.34
qe	High	mHYLPVAIVTGATR	1	14	N-Term(Dimethyl:2H(6))	1	1	YKL055C	OAR1	0	2	1	781.951	1562.9	-2.38534	HCD	19.0347	250	47.4531	11988	qExPlus02_00984.raw	34.36	35	28	2.15712e+07	0	0.002441	1.14133e+07	2.15712e+07	1.25175e+07	2.15803e+07
qe	High	mHYLPVAIVTGATR	1	14	N-Term(Dimethyl:2H(6)); M1(Oxidation)	1	1	YKL055C	OAR1	0	2	1	789.948	1578.89	-3.00626	HCD	0	250	47.4734	11993	qExPlus02_00984.raw	28.97	36	29	2.36978e+06	0	0.0009898	3314475	2.36978e+06	1.58319e+07	2.39501e+07
qe	High	mHYLPVAIVTGATR	1	14	N-Term(Dimethyl)	1	1	YKL055C	OAR1	0	2	1	778.937	1556.87	2.6642	HCD	0	250	47.7817	12070	qExPlus02_00984.raw	18.51	36	29	4.06365e+06	0.005141	0.06416	2306130		1.81381e+07	2.39501e+07	1.81381e+07	2.39501e+07	1.32043
Fusion	High	mHYLPVAIVTGATR	1	14	N-Term(Dimethyl:2H(6))	1	1	YKL055C	OAR1	0	2	1	781.953	1562.9	-0.588925	HCD	15.2207	34.3029	13.9819	8021	Fusion002161.raw	39.43	21	14	1.37815e+07	0	0.01132	14159007	1.36111e+07	14159007	1.36111e+07
Fusion	High	mHYLPVAIVTGATR	1	14	N-Term(Dimethyl); M1(Oxidation)	1	1	YKL055C	OAR1	0	2	1	786.933	1572.86	0.903004	HCD	0	34.453	8.53163	4941	Fusion002161.raw	30.8	26	19	6.49156e+06	0	0.1015	6.49156e+06	5.06236e+06	2.06506e+07	1.86734e+07
Fusion	High	mHYLPVAIVTGATR	1	14	N-Term(Dimethyl:2H(6)); M1(Oxidation)	1	1	YKL055C	OAR1	0	2	1	789.958	1578.91	8.90007	HCD	14.1639	34.5429	8.25014	4776	Fusion002161.raw	21.46	23	16	1.98734e+06	0	0.1507	3532.53	746013	2.06541e+07	1.94194e+07	2.06541e+07	1.94194e+07	0.940222
qe	High	mHYLPVAIVTGATR	1	14	N-Term(Dimethyl)	1	1	YKL055C	OAR1	0	3	1	519.624	1556.86	-2.59777	HCD	1.841	152.521	47.6094	12026	qExPlus02_00984.raw	42.58	36	29	987680	0	0.001514	987680	2.65342e+06	987680	2.65342e+06	987680	2.65342e+06	2.68652
Fusion	Medium	mHYLPVAIVTGATR	1	14	N-Term(Dimethyl); M1(Oxidation)	1	1	YKL055C	OAR1	0	3	1	524.957	1572.86	-0.308509	ETD	10.9522	50	9.34312	5405	Fusion002161.raw	30.51	26	19	2.08789e+06	0.04279	0.3857		2.28637e+06	0	2.28637e+06
Fusion	High	mHYLPVAIVTGATR	1	14	N-Term(Dimethyl:2H(6))	1	1	YKL055C	OAR1	0	3	1	521.638	1562.9	-0.792792	HCD	23.3021	34.3329	13.8598	7953	Fusion002161.raw	63.45	21	14	1.74071e+08	0	0.0002998	1.93006e+08	1.73724e+08	1.93006e+08	1.76011e+08
Fusion	High	mHYLPVAIVTGATR	1	14	N-Term(Dimethyl:2H(6)); M1(Oxidation)	1	1	YKL055C	OAR1	0	3	1	526.971	1578.9	2.16525	HCD	6.61609	34.5729	8.17183	4730	Fusion002161.raw	50.4	25	18	9.95221e+07	0	0.004375	91125364	76343000	2.84132e+08	2.52354e+08	2.84132e+08	2.52354e+08	0.888158
qe_Acetyl	High	tSIDNRPLPF	2	11	N-Term(Acetyl)	1	1	YPL134C	ODC1	0	2	1	601.313	1201.62	-1.84719	HCD	28.7251	250	67.6648	17479	qExPlus02_00982.raw	16.83	35	28	9.54748e+06	0.005022	0.09621			0	0	0	0
qe_Acetyl	High	sSDSNAkPLPF	2	12	N-Term(Acetyl); K7(Dimethyl:2H(6))	1	1	YOR222W	ODC2	0	2	1	619.83	1238.65	-0.423993	HCD	0	250	57.2302	14910	qExPlus02_00982.raw	32.62	35	28	5.21837e+06	0	0.006916	4.87226e+06	4.69748e+06	4.87226e+06	4.69748e+06	4.87226e+06	4.69748e+06	0.964128
qe	High	yRYDNGPSYR	33	42	N-Term(Dimethyl)	1	1	YKR087C	OMA1	1	2	1	659.811	1318.62	-1.57041	HCD	0	250	16.3744	3983	qExPlus02_00984.raw	50.35	32	25	3.83482e+07	0	6.697e-05	3.82314e+07	2.04832e+07	3.82314e+07	2.04832e+07
qe	High	yRYDNGPSYR	33	42	N-Term(Dimethyl:2H(6))	1	1	YKR087C	OMA1	1	2	1	662.831	1324.65	-0.413085	HCD	51.3636	250	16.6536	4055	qExPlus02_00984.raw	23.7	31	24	1177718	0	0.01156	4.16388e+06	1177718	4.23952e+07	2.16609e+07
qe	High	yRYDNGPSYR	33	42	N-Term(Dimethyl)	1	1	YKR087C	OMA1	1	2	1	659.812	1318.62	-1.07772	HCD		250	16.9233	4127	qExPlus02_00984.raw	22.86	32	25	261300	0.0008655	0.02132			4.23952e+07	2.16609e+07	4.23952e+07	2.16609e+07	0.510929
qe	High	mkQPVVVIGSGLAGLTTSNR	33	52	N-Term(Dimethyl); M1(Oxidation); K2(Dimethyl)	1	1	YJR051W	OSM1	1	3	1	700.733	2100.18	0.186979	HCD		250	46.694	11808	qExPlus02_00984.raw	63.77	34	27	1.25891e+06	0	0.0002181	1.25891e+06	1.62861e+06	1.25891e+06	1.62861e+06
qe	High	mkQPVVVIGSGLAGLTTSNR	33	52	N-Term(Dimethyl:2H(6)); K2(Dimethyl:2H(6))	1	1	YJR051W	OSM1	1	3	1	699.427	2096.27	0.109104	HCD	29.7708	250	50.177	12656	qExPlus02_00984.raw	51.21	34	27	2.58142e+07	0	4.182e-05	2.27652e+07	2.58142e+07	2.40241e+07	2.74428e+07
qe	High	mkQPVVVIGSGLAGLTTSNR	33	52	N-Term(Dimethyl); K2(Dimethyl)	1	1	YJR051W	OSM1	1	3	1	695.401	2084.19	0.141236	HCD	0	250	50.6332	12765	qExPlus02_00984.raw	73.83	33	26	584552	0	1.785e-05	455734	37078.8	2.44799e+07	2.74799e+07	2.44799e+07	2.74799e+07	1.12255
qe	High	wISFQAkR	34	41	N-Term(Dimethyl:2H(6)); K7(Dimethyl:2H(6))	1	1	YER154W	OXA1	1	2	1	552.358	1103.71	-1.76611	HCD	16.7472	250	24.6895	6074	qExPlus02_00984.raw	12.82	33	26	1.30538e+07	0.004334	0.1433	9102.34	7.17491e+06	9102.34	7.17491e+06	9102.34	7.17491e+06	788.249
qe_Acetyl	Medium	mLLFPR	1	6	N-Term(Acetyl)	1	1	YDR538W	PAD1	0	2	1	409.733	818.459	-0.783921	HCD	14.9566	250	80.8683	20687	qExPlus02_00982.raw	31.66	36	29	818184	0.02308	0.2143			0	0	0	0
qe_Acetyl	High	mFTSAIR	1	7	N-Term(Acetyl)	1	1	YKR065C	PAM17	0	1	1	867.437	867.437	-2.35667	HCD	0	250	58.4915	15235	qExPlus02_00982.raw	27.85	34	27	1.37297e+08	0.006948	0.105			0	0
qe_Acetyl	High	mFTSAIR	1	7	N-Term(Acetyl); M1(Oxidation)	1	1	YKR065C	PAM17	0	1	1	883.431	883.431	-3.12147	HCD	0	250	44.1562	11528	qExPlus02_00982.raw	23.53	34	27	9.26737e+06	0.005022	0.08796			0	0
qe_Acetyl	High	mFTSAIR	1	7	N-Term(Acetyl); M1(Oxidation)	1	1	YKR065C	PAM17	0	1	1	883.433	883.433	-1.04881	HCD	7.17632	250	44.4721	11610	qExPlus02_00982.raw	18.44	33	26	1.12234e+07	0.006948	0.11			0	0	0	0
qe_Acetyl	High	mFTSAIR	1	7	N-Term(Acetyl)	1	1	YKR065C	PAM17	0	2	1	434.222	867.438	-1.87964	HCD	5.61538	20.6606	58.7601	15300	qExPlus02_00982.raw	39.51	33	26	2.51941e+08	0.002723	0.07512			0	0
qe_Acetyl	High	mFTSAIR	1	7	N-Term(Acetyl); M1(Oxidation)	1	1	YKR065C	PAM17	0	2	1	442.22	883.432	-2.30763	HCD	70.1938	167.495	58.8044	15313	qExPlus02_00982.raw	8.79	32	25	2.47438e+07	0.002723	0.08323			0	0
qe_Acetyl	High	mFTSAIR	1	7	N-Term(Acetyl); M1(Oxidation)	1	1	YKR065C	PAM17	0	2	1	442.22	883.433	-1.68583	HCD	1.9712	46.9704	44.6365	11651	qExPlus02_00982.raw	37.16	32	25	9.04965e+07	0.006155	0.1086			0	0
qe_Acetyl	Medium	mFTSAIR	1	7	N-Term(Acetyl); M1(Oxidation)	1	1	YKR065C	PAM17	0	2	1	442.219	883.431	-3.55122	HCD	0	250	47.5784	12405	qExPlus02_00982.raw	30.55	32	25	376301	0.01487	0.1388			0	0
qe_Acetyl	Medium	mFTSAIR	1	7	N-Term(Acetyl); M1(Oxidation)	1	1	YKR065C	PAM17	0	2	1	442.22	883.432	-2.30763	HCD	0	188.678	44.108	11515	qExPlus02_00982.raw	34.76	33	26	8.51896e+07	0.03167	0.2708			0	0	0	0
qe_Acetyl	High	mLAASFkR	1	8	N-Term(Acetyl); M1(Oxidation); K7(Dimethyl:2H(6))	1	1	YER178W	PDA1	1	2	1	508.296	1015.59	-1.92554	HCD	9.90714	226.375	42.0363	11287	qExPlus02_00983.raw	32.01	34	27	1.08687e+08	0	0.01546	19568.4	62302944	19568.4	62302944
qe_Acetyl	High	mLAASFkR	1	8	N-Term(Acetyl); K7(Dimethyl:2H(6))	1	1	YER178W	PDA1	1	2	1	500.299	999.59	-2.40286	HCD	3.7761	19.667	41.9034	11256	qExPlus02_00983.raw	45.02	33	26	1.89725e+08	0.002723	0.06845	19568.4	105465600	39136.7	167768544
qe_Acetyl	High	mLAASFkR	1	8	N-Term(Acetyl); M1(Oxidation); K7(Dimethyl:2H(6))	1	1	YER178W	PDA1	1	2	1	508.297	1015.59	-0.122587	HCD	16.76	250	34.0461	9322	qExPlus02_00983.raw	13.55	34	27	902085	0.006155	0.1076	19568.4	674441	58705.1	1.68443e+08
qe_Acetyl	High	mLAASFkR	1	8	N-Term(Acetyl); M1(Oxidation); K7(Dimethyl:2H(6))	1	1	YER178W	PDA1	1	2	1	508.297	1015.59	-1.56495	HCD	23.1398	250	39.5286	10690	qExPlus02_00983.raw	11.3	34	27	1.66917e+06	0.006155	0.1083	19568.4	1.02551e+06	78273.4	1.69468e+08
qe_Acetyl	High	mLAASFkR	1	8	N-Term(Acetyl); M1(Oxidation); K7(Dimethyl:2H(6))	1	1	YER178W	PDA1	1	2	1	508.297	1015.59	-1.38465	HCD	12.1074	7.82269	31.6765	8635	qExPlus02_00983.raw	27.46	34	27	212763812	0.006155	0.1078	19568.4	128268136	97841.8	2.97737e+08
qe_Acetyl	High	mLAASFkR	1	8	N-Term(Acetyl); M1(Oxidation); K7(Dimethyl:2H(6))	1	1	YER178W	PDA1	1	2	1	508.297	1015.59	-1.32455	HCD	14.7626	250	33.7361	9247	qExPlus02_00983.raw	17.62	34	27	1.20909e+06	0.001447	0.06456	19568.4	651190	117410	2.98388e+08
qe_Acetyl	Medium	mLAASFkR	1	8	N-Term(Acetyl); M1(Oxidation); K7(Dimethyl:2H(6))	1	1	YER178W	PDA1	1	2	1	508.297	1015.59	-0.663472	HCD	29.9204	8.91355	31.4118	8553	qExPlus02_00983.raw	17.95	34	27	4.92982e+08	0.02999	0.1974	19568.4	281285824	136979	5.79674e+08	136979	5.79674e+08	4231.86
qe_Acetyl	High	mFSRLPTSLAR	1	11	N-Term(Acetyl)	1	1	YBR221C	PDB1	1	2	1	660.856	1320.71	-3.13579	HCD	6.77029	250	56.2539	14763	qExPlus02_00983.raw	41.66	34	27	1.4682e+07	0	0.003087			0	0	0	0
qe	High	tPLkSSLALDTAR	51	63	N-Term(Dimethyl:2H(6)); K4(Dimethyl:2H(6))	1	1	YPR002W	PDH1	1	2	1	720.961	1440.91	-2.43653	HCD	33.9058	250	28.1343	6975	qExPlus02_00984.raw	29.22	34	27	1.25954e+06	0	0.01899	9102.34	791568	9102.34	791568	9102.34	791568	86.9631
qe_Acetyl	High	mLSAISkVSTLkScTR	1	16	N-Term(Acetyl); M1(Oxidation); K7(Dimethyl:2H(6)); K12(Dimethyl:2H(6)); C14(Carbamidomethyl)	1	1	YGR193C	PDX1	2	3	1	636.706	1908.1	-1.09567	HCD	12.597	40.9193	39.1981	9379	qExPlus02_00989.raw	30.01	34	27	2.39024e+07	0.001447	0.01706	19568.4	11310260	19568.4	11310260
qe_Acetyl	High	mLSAISkVSTLkScTR	1	16	N-Term(Acetyl); M1(Oxidation); K7(Dimethyl:2H(6)); K12(Dimethyl:2H(6)); C14(Carbamidomethyl)	1	1	YGR193C	PDX1	2	3	1	636.705	1908.1	-2.24721	HCD	29.4389	250	50.6801	12776	qExPlus02_00984.raw	10.81	34	27	495233	0.003945	0.08694	19568.4	191368	39136.7	1.15016e+07
qe_Acetyl	High	mLSAISkVSTLkScTR	1	16	N-Term(Acetyl); K7(Dimethyl:2H(6)); K12(Dimethyl:2H(6)); C14(Carbamidomethyl)	1	1	YGR193C	PDX1	2	3	1	631.375	1892.11	0.207551	HCD	3.34193	250	50.666	12773	qExPlus02_00984.raw	24.83	33	26	432242	0	0.005326	19568.4	149607	58705.1	1.16512e+07	58705.1	1.16512e+07	198.471
Fusion_Acetyl	High	mLSAISkVSTLkScTR	1	16	N-Term(Acetyl); K7(Dimethyl:2H(6)); K12(Dimethyl:2H(6)); C14(Carbamidomethyl)	1	1	YGR193C	PDX1	2	3	1	631.374	1892.11	-1.92146	ETD	16.7651	50	18.8781	10777	Fusion002161.raw	27.16	33	26	2.54007e+07	0	0.0534	2297.14	9548137	2297.14	9548137	2297.14	9548137	4156.54
qe_Acetyl	High	mLTITkR	1	7	N-Term(Acetyl); M1(Oxidation); K6(Dimethyl:2H(6))	1	1	YER153C	PET122	1	2	1	477.798	954.589	-3.50898	HCD	24.8162	250	37.4909	10201	qExPlus02_00983.raw	7.16	33	26	2.19891e+06	0.001447	0.04707	19568.4	1.80508e+06	19568.4	1.80508e+06
qe_Acetyl	High	mLTITkR	1	7	N-Term(Acetyl); K6(Dimethyl:2H(6))	1	1	YER153C	PET122	1	2	1	469.801	938.595	-2.61369	HCD		250	37.4561	10193	qExPlus02_00983.raw	28.74	31	24	4.27011e+06	0.001447	0.05193	19568.4	3.44242e+06	39136.7	5.2475e+06
qe_Acetyl	Medium	mLTITkR	1	7	N-Term(Acetyl); M1(Oxidation); K6(Dimethyl:2H(6))	1	1	YER153C	PET122	1	2	2	477.799	954.591	-1.71871	HCD	26.7358	167.391	26.0817	6698	qExPlus02_00983.raw	4.12	33	26	1.73583e+07	0.04646	0.2869	19568.4	11308490	58705.1	1.6556e+07	58705.1	1.6556e+07	282.02
qe_Acetyl	High	mLkLAR	1	6	N-Term(Acetyl); K3(Dimethyl:2H(6))	1	1	YPL159C	PET20	1	2	1	404.272	807.537	-2.94306	HCD	0	250	36.6194	9989	qExPlus02_00983.raw	27.41	28	21	7006966	0.001447	0.06301	19568.4	4.98698e+06	19568.4	4.98698e+06	19568.4	4.98698e+06	254.849
qe	High	iQNQDEMLkQGTLDR	51	65	N-Term(Dimethyl); K9(Dimethyl)	1	1	YBL030C	PET9	1	2	1	922.981	1844.95	0.56537	HCD	0	250	27.7785	6881	qExPlus02_00984.raw	74.55	36	29	2.71907e+06	0	2.361e-06	2.58113e+06	3.03387e+06	2.58113e+06	3.03387e+06	2.58113e+06	3.03387e+06	1.1754
qe	High	iQNQDEmLkQGTLDR	51	65	N-Term(Dimethyl); M7(Oxidation); K9(Dimethyl)	1	1	YBL030C	PET9	1	3	1	620.986	1860.94	-2.81464	HCD	9.88636	250	20.6643	5052	qExPlus02_00984.raw	35.61	35	28	3.07897e+07	0	0.002964	22239747	1.12926e+07	22239747	1.12926e+07
qe	High	iQNQDEMLkQGTLDR	51	65	N-Term(Dimethyl); K9(Dimethyl)	1	1	YBL030C	PET9	1	3	1	615.655	1844.95	-1.98925	HCD	8.3637	66.7941	27.7122	6864	qExPlus02_00984.raw	24.95	36	29	2.23519e+07	0.0008655	0.01676	2.14887e+07	47057306	4.37284e+07	5.83499e+07
qe	High	iQNQDEmLkQGTLDR	51	65	N-Term(Dimethyl); M7(Oxidation); K9(Dimethyl)	1	1	YBL030C	PET9	1	3	1	620.986	1860.94	-2.22428	HCD	48.3762	136.078	27.7597	6877	qExPlus02_00984.raw	36.67	36	29	1.57747e+07	0	0.00151	1.57747e+07	4.48066e+06	5.95031e+07	62830531
qe	High	iQNQDEMLkQGTLDR	51	65	N-Term(Dimethyl); K9(Dimethyl)	1	1	YBL030C	PET9	1	3	1	615.654	1844.95	-3.3787	HCD	21.6169	250	27.9857	6936	qExPlus02_00984.raw	32.02	36	29	3.89567e+06	0	0.0003046	3610432	1.27632e+06	6.31135e+07	6.41068e+07	6.31135e+07	6.41068e+07	1.01574
Fusion_Acetyl	High	kYAGILDcFkR	66	76	N-Term(Acetyl); K1(Dimethyl:2H(6)); C8(Carbamidomethyl); K10(Dimethyl:2H(6))	1	1	YBL030C	PET9	2	3	1	494.297	1480.88	2.91414	ETD	8.50136	50	13.2465	7611	Fusion002161.raw	42.49	34	27	1.4525e+07	0	0.004647	2.08155e+07	1.4525e+07	2.08155e+07	1.4525e+07	2.08155e+07	1.4525e+07	0.697799
qe_Acetyl	High	tATQEGVISFWR	77	88	N-Term(Acetyl)	1	1	YBL030C	PET9	0	2	1	718.862	1436.72	-0.602003	HCD	0	250	73.2938	18851	qExPlus02_00982.raw	58.26	34	27	8.15408e+06	0	0.0003695			0	0	0	0
qe	High	mQSQDScYGVAFR	1	13	N-Term(Dimethyl); M1(Oxidation); C7(Carbamidomethyl)	1	1	YGR240C	PFK1	0	2	1	796.844	1592.68	-1.78504	HCD	0	250	31.6593	8630	qExPlus02_00983.raw	83.51	27	20	2.26359e+07	0	1.468e-06	2.2003e+07	9.37079e+06	2.2003e+07	9.37079e+06
qe	High	mQSQDScYGVAFR	1	13	N-Term(Dimethyl:2H(6)); C7(Carbamidomethyl)	1	1	YGR240C	PFK1	0	2	1	791.864	1582.72	-2.81244	HCD	0	250	34.7003	9493	qExPlus02_00983.raw	50.43	28	21	2.96433e+06	0	0.0009997	8.68152e+06	2.96433e+06	30684536	1.23351e+07	30684536	1.23351e+07	0.401998
qe_Acetyl	Medium	mNRSPGEFQR	1	10	N-Term(Acetyl); M1(Oxidation)	1	1	YGR231C	PHB2	1	2	1	640.294	1279.58	-3.45852	HCD	0	250	17.1894	4216	qExPlus02_00983.raw	24.25	32	25	3.2858e+06	0.0159	0.1405			0	0	0	0
qe_Acetyl	Medium	sPGEFQR	4	10	N-Term(Acetyl)	1	1	YGR231C	PHB2	0	2	1	431.705	862.403	-2.87313	HCD	33.5004	142.966	29.1038	7275	qExPlus02_00982.raw	29.44	33	26	1.02437e+07	0.01213	0.1156			0	0	0	0
qe	High	gGALFINNALFNVDGGHR	49	66	N-Term(Dimethyl)	1	1	YGR231C	PHB2	0	3	1	633.998	1899.98	-1.19376	HCD	50.1773	250	56.7812	14281	qExPlus02_00984.raw	70.99	36	29	415893	0	2.974e-05	415893	760028	415893	760028	415893	760028	1.82746
qe_Acetyl	High	sMELTANER	71	79	N-Term(Acetyl)	1	1	YGR086C	PIL1	0	2	1	546.752	1092.5	-2.16937	HCD	0	250	38.6532	9945	qExPlus02_00982.raw	75.42	32	25	1.36572e+07	0	0.007005			0	0
qe_Acetyl	High	smELTANER	71	79	N-Term(Acetyl); M2(Oxidation)	1	1	YGR086C	PIL1	0	2	1	554.75	1108.49	-1.62531	HCD	0	250	26.9081	6671	qExPlus02_00982.raw	46.84	31	24	3.05348e+06	0.001447	0.05265			0	0	0	0
qe_Acetyl	High	skYQINcIR	2	10	N-Term(Acetyl); K2(Dimethyl:2H(6)); C7(Carbamidomethyl)	1	1	YGL059W	PKP2	1	2	1	629.348	1257.69	-0.247174	HCD	9.27169	202.753	28.71	7662	qExPlus02_00983.raw	38	35	28	1.6451e+08	0	0.003426		82996432	0	82996432	0	82996432
qe_Acetyl	Medium	pVPEEYLQTDPSYGLTSDEVLkR	74	96	N-Term(Acetyl); K22(Dimethyl)	1	1	YGL008C	PMA1	1	3	1	902.793	2706.36	4.50923	HCD	43.7722	250	55.3735	14554	qExPlus02_00983.raw	7.37	36	29	1.67745e+06	0.01654	0.1617	370626	19568.4	370626	19568.4	370626	19568.4	0.0527981
qe	High	tDPSYGLTSDEVLkR	82	96	N-Term(Dimethyl); K14(Dimethyl)	1	1	YGL008C	PMA1	1	2	1	868.954	1736.9	-3.39595	HCD		250	38.5065	9173	qExPlus02_00989.raw	56.74	36	29	1.18747e+06	0	0.0001872	900426	9102.34	900426	9102.34	900426	9102.34	0.0101089
qe	High	mSPPVYSDISR	1	11	N-Term(Dimethyl); M1(Oxidation)	1	1	YNL055C	POR1	0	2	1	648.316	1295.62	-4.77515	HCD	33.2802	250	29.9874	8089	qExPlus02_00983.raw	50.27	34	27	4.9635e+06	0	0.0001529	2.04142e+06	9102.34	2.04142e+06	9102.34
qe	High	mSPPVYSDISR	1	11	N-Term(Dimethyl)	1	1	YNL055C	POR1	0	2	1	640.319	1279.63	-3.56192	HCD	10.0713	250	37.4655	10195	qExPlus02_00983.raw	56	34	27	1.51865e+07	0	9.962e-05	1.20889e+07	2.73502e+06	1.41303e+07	2.74413e+06
qe	High	mSPPVYSDISR	1	11	N-Term(Dimethyl); M1(Oxidation)	1	1	YNL055C	POR1	0	2	1	648.317	1295.63	-2.13707	HCD	0	250	37.4815	10199	qExPlus02_00983.raw	46.06	34	27	4.72998e+06	0	0.00917	4.23266e+06	229171	1.8363e+07	2.9733e+06	1.8363e+07	2.9733e+06	0.161918
qe_Acetyl	High	mSPPVYSDISR	1	11	N-Term(Acetyl)	1	1	YNL055C	POR1	0	2	1	647.309	1293.61	-3.44217	HCD	2.91416	250	58.455	15226	qExPlus02_00982.raw	58.29	34	27	2.18281e+07	0	0.01579			0	0	0	0
qe	High	sPPVYSDISR	2	11	N-Term(Dimethyl)	1	1	YNL055C	POR1	0	1	1	1148.59	1148.59	-1.07118	HCD	5.60263	1.48283	27.6075	7252	qExPlus02_00983.raw	41.99	35	28	1118912064	0	0.008664	1118912064	4095755616	1118912064	4095755616
qe	High	sPPVYSDISR	2	11	N-Term(Dimethyl:2H(6))	1	1	YNL055C	POR1	0	1	1	1154.63	1154.63	-1.75477	HCD	6.30177	1.30325	27.8684	7346	qExPlus02_00983.raw	48.75	34	27	451945152	0	0.0126	2217291520		3336203584	4095755616
qe	High	sPPVYSDISR	2	11	N-Term(Dimethyl)	1	1	YNL055C	POR1	0	1	1	1148.59	1148.59	-0.964901	HCD	3.04798	23.5201	28.129	7459	qExPlus02_00983.raw	44.69	35	28	171070146	0	0.01078	171070146	110084262	3507273730	4205839878
qe	High	sPPVYSDISR	2	11	N-Term(Dimethyl)	1	1	YNL055C	POR1	0	1	1	1148.59	1148.59	-0.646068	HCD	0	146.102	28.3899	7555	qExPlus02_00983.raw	46.77	35	28	24124541	0	0.0005342	22690505	1.77911e+07	3529964235	4.22363e+09
qe	High	sPPVYSDISR	2	11	N-Term(Dimethyl:2H(6))	1	1	YNL055C	POR1	0	1	1	1154.63	1154.63	0.465395	HCD	0	250	28.6859	7653	qExPlus02_00983.raw	44.7	34	27	1751451	0	0.0005022		1.08909e+06	3529964235	4224720070	3529964235	4224720070	1.19682
qe_Acetyl	High	sPPVYSDISR	2	11	N-Term(Acetyl)	1	1	YNL055C	POR1	0	1	1	1162.57	1162.57	-2.75288	HCD	0	250	47.4746	12378	qExPlus02_00982.raw	48.51	35	28	2.00006e+07	0	0.007746			0	0	0	0
qe	High	sPPVYSDISR	2	11	N-Term(Dimethyl:2H(6))	1	1	YNL055C	POR1	0	2	1	577.819	1154.63	-2.03072	HCD	40.1267	54.0126	27.8683	6941	qExPlus02_00982.raw	38.44	33	26	1.39453e+08	0	0.01067	1.45381e+08	1.39453e+08	1.45381e+08	1.39453e+08
qe	High	sPPVYSDISR	2	11	N-Term(Dimethyl)	1	1	YNL055C	POR1	0	2	1	574.802	1148.6	2.05231	HCD	62.8908	250	46.5037	12123	qExPlus02_00982.raw	14.59	35	28	1.27715e+06	0.007065	0.1144	690037	9102.34	1.46071e+08	1.39462e+08
qe	High	sPPVYSDISR	2	11	N-Term(Dimethyl:2H(6))	1	1	YNL055C	POR1	0	2	1	577.818	1154.63	-3.51083	HCD	0	250	63.9696	16572	qExPlus02_00982.raw	38.14	34	27	7.60226e+06	0	0.01087			1.46071e+08	1.39462e+08
qe	High	sPPVYSDISR	2	11	N-Term(Dimethyl)	1	1	YNL055C	POR1	0	2	1	574.798	1148.59	-5.28087	HCD	9.61299	250	64.1225	16610	qExPlus02_00982.raw	44.24	35	28	7.25834e+06	0	0.001256			1.46071e+08	1.39462e+08
qe	High	sPPVYSDISR	2	11	N-Term(Dimethyl:2H(6))	1	1	YNL055C	POR1	0	2	1	577.819	1154.63	-0.656334	HCD	7.75893	63.4695	26.7261	6932	qExPlus02_00983.raw	40.52	34	27	6.17372e+07	0	0.002898	8.02571e+07	6.17372e+07	2.26328e+08	2.01199e+08
qe	High	sPPVYSDISR	2	11	N-Term(Dimethyl:2H(6))	1	1	YNL055C	POR1	0	2	1	577.819	1154.63	-1.81928	HCD	37.7373	3.83225	27.2975	7133	qExPlus02_00983.raw	44.16	34	27	109091139002	0	0.02129	87814814128	109059992160	8.80411e+10	1.09261e+11
qe	High	sPPVYSDISR	2	11	N-Term(Dimethyl:2H(6))	1	1	YNL055C	POR1	0	2	1	577.819	1154.63	-1.29067	HCD	4.29318	0.728021	28.0722	7435	qExPlus02_00983.raw	55.7	34	27	20173305856	0	0.007628			8.80411e+10	1.09261e+11
qe	Medium	sPPVYSDISR	2	11	N-Term(Dimethyl:2H(6))	1	1	YNL055C	POR1	0	2	1	577.82	1154.63	-0.0220008	HCD	4.36644	0.666554	28.3402	7537	qExPlus02_00983.raw	26.39	34	27	1.45785e+09	0.04035	0.3845	2064132572	1.45785e+09	9.01053e+10	1.10719e+11
qe	High	sPPVYSDISR	2	11	N-Term(Dimethyl)	1	1	YNL055C	POR1	0	2	1	574.801	1148.59	0.245588	HCD	0.43058	0.82392	28.5129	7601	qExPlus02_00983.raw	54.14	36	29	4.67234e+08	0.005141	0.06865	454473348	321585024	9.05597e+10	1.11041e+11
qe	High	sPPVYSDISR	2	11	N-Term(Dimethyl)	1	1	YNL055C	POR1	0	2	1	574.801	1148.59	-0.392079	HCD	1.82732	4.5244	29.043	7757	qExPlus02_00983.raw	48.23	35	28	1.3643e+08	0	0.00203	1.3643e+08	112013048	9.06962e+10	1.11153e+11
qe	High	sPPVYSDISR	2	11	N-Term(Dimethyl:2H(6))	1	1	YNL055C	POR1	0	2	1	577.82	1154.63	0.295166	HCD	6.80232	6.94653	29.1284	7781	qExPlus02_00983.raw	35.87	34	27	1.53077e+08	0	0.03701	163073284	152691073	9.08593e+10	1.11305e+11
qe	High	sPPVYSDISR	2	11	N-Term(Dimethyl)	1	1	YNL055C	POR1	0	2	1	574.801	1148.6	0.458144	HCD	0	25.5739	29.3023	7856	qExPlus02_00983.raw	45.33	36	29	1.71368e+07	0	0.0002276	9791926	9102.34	9.0869e+10	1.11305e+11
qe	High	sPPVYSDISR	2	11	N-Term(Dimethyl:2H(6))	1	1	YNL055C	POR1	0	2	1	577.82	1154.63	-0.339168	HCD	10.1325	43.5058	29.7216	8010	qExPlus02_00983.raw	38.58	34	27	48004814	0	0.008522	9102.34	25718900	9.08691e+10	1.11331e+11
qe	High	sPPVYSDISR	2	11	N-Term(Dimethyl)	1	1	YNL055C	POR1	0	2	1	574.8	1148.59	-0.817191	HCD	5.08249	43.3606	30.3592	8187	qExPlus02_00983.raw	35.41	35	28	12733936	0.005141	0.06798		19483946	9.08691e+10	1.11351e+11
qe	High	sPPVYSDISR	2	11	N-Term(Dimethyl:2H(6))	1	1	YNL055C	POR1	0	2	1	577.819	1154.63	-2.13645	HCD	12.8993	20.9271	30.5198	8233	qExPlus02_00983.raw	18.51	34	27	4.5978e+07	0.004334	0.1586	73860918	45700319	9.09429e+10	1.11396e+11
qe	High	sPPVYSDISR	2	11	N-Term(Dimethyl:2H(6))	1	1	YNL055C	POR1	0	2	1	577.818	1154.63	-2.66506	HCD	13.0173	20.2271	30.7881	8327	qExPlus02_00983.raw	36.1	34	27	1.56795e+08	0	0.01949	1.5409e+08	1.56795e+08	9.1097e+10	1.11553e+11
qe	High	sPPVYSDISR	2	11	N-Term(Dimethyl)	1	1	YNL055C	POR1	0	2	1	574.8	1148.59	-1.56114	HCD	2.49581	49.6863	32.0534	8743	qExPlus02_00983.raw	38.67	35	28	9055894	0	0.008997		19945724	9.1097e+10	1.11573e+11
qe	High	sPPVYSDISR	2	11	N-Term(Dimethyl:2H(6))	1	1	YNL055C	POR1	0	2	1	577.819	1154.63	-1.29067	HCD	21.1817	21.1544	32.3704	8833	qExPlus02_00983.raw	31.47	34	27	3.92974e+07	0	0.06759	4.51322e+07	3.92974e+07	9.11421e+10	1.11612e+11
qe	High	sPPVYSDISR	2	11	N-Term(Dimethyl)	1	1	YNL055C	POR1	0	2	1	574.8	1148.59	-0.923469	HCD	10.5557	66.4956	33.3926	9162	qExPlus02_00983.raw	21.85	35	28	4.92615e+07	0.007065	0.108	47336983	3.12016e+07	9.11895e+10	1.11643e+11
qe	High	sPPVYSDISR	2	11	N-Term(Dimethyl)	1	1	YNL055C	POR1	0	2	1	574.799	1148.59	-3.04903	HCD	12.1156	203.206	34.248	9370	qExPlus02_00983.raw	21.15	35	28	22684497	0.008862	0.1322	21407833	804173	9.12109e+10	1.11644e+11
qe	Medium	sPPVYSDISR	2	11	N-Term(Dimethyl)	1	1	YNL055C	POR1	0	2	1	574.801	1148.59	0.13931	HCD	22.6327	250	34.5393	9451	qExPlus02_00983.raw	9.53	36	29	1.00108e+07	0.04632	0.43	1.00108e+07	2.86701e+06	9.12209e+10	1.11647e+11
qe	High	sPPVYSDISR	2	11	N-Term(Dimethyl:2H(6))	1	1	YNL055C	POR1	0	2	1	577.818	1154.63	-2.24217	HCD	25.6421	250	34.8117	9521	qExPlus02_00983.raw	20.79	34	27	2.00181e+06	0.002744	0.1062	9102.34	1.33578e+06	9.12209e+10	1.11648e+11
qe	High	sPPVYSDISR	2	11	N-Term(Dimethyl)	1	1	YNL055C	POR1	0	2	1	574.8	1148.59	-2.09253	HCD	0	250	36.1101	9852	qExPlus02_00983.raw	23.14	35	28	5.10379e+06	0.005141	0.07992	4.76852e+06	2688454	9.12257e+10	1.11651e+11
qe	High	sPPVYSDISR	2	11	N-Term(Dimethyl:2H(6))	1	1	YNL055C	POR1	0	2	1	577.818	1154.63	-2.34789	HCD	16.5161	250	36.3865	9927	qExPlus02_00983.raw	26.35	34	27	3.92306e+06	0.001025	0.07075	9102.34	3.32919e+06	9.12257e+10	1.11655e+11
qe	High	sPPVYSDISR	2	11	N-Term(Dimethyl)	1	1	YNL055C	POR1	0	2	1	574.799	1148.59	-2.51764	HCD	0	250	36.5406	9965	qExPlus02_00983.raw	25.69	35	28	2.16998e+06	0.0008655	0.02779	2.16998e+06	1.65825e+06	9.12278e+10	1.11656e+11
qe	High	sPPVYSDISR	2	11	N-Term(Dimethyl:2H(6))	1	1	YNL055C	POR1	0	2	1	577.818	1154.63	-2.24217	HCD	50.512	250	36.7029	10010	qExPlus02_00983.raw	23.31	34	27	4.67446e+06	0	0.04031	9102.34	2.83993e+06	9.12279e+10	1.11659e+11
qe	High	sPPVYSDISR	2	11	N-Term(Dimethyl)	1	1	YNL055C	POR1	0	2	1	574.8	1148.59	-1.02975	HCD	13.8301	250	37.2647	10146	qExPlus02_00983.raw	24.52	35	28	1.29752e+07	0.008862	0.1464	1.29752e+07	4.79037e+06	9.12408e+10	1.11664e+11
qe	High	sPPVYSDISR	2	11	N-Term(Dimethyl:2H(6))	1	1	YNL055C	POR1	0	2	1	577.821	1154.64	2.8325	HCD	12.4569	250	38.2467	10379	qExPlus02_00983.raw	37.69	34	27	2.58451e+06	0	0.03063	4.26703e+06		9.12451e+10	1.11664e+11
qe	High	sPPVYSDISR	2	11	N-Term(Dimethyl:2H(6))	1	1	YNL055C	POR1	0	2	1	577.819	1154.63	-1.81928	HCD	14.8019	250	41.8626	11246	qExPlus02_00983.raw	31.27	34	27	669118	0.002744	0.1104			9.12451e+10	1.11664e+11
qe	High	sPPVYSDISR	2	11	N-Term(Dimethyl)	1	1	YNL055C	POR1	0	2	1	574.8	1148.59	-0.817191	HCD	29.6674	250	43.5766	11649	qExPlus02_00983.raw	19.62	35	28	3.14613e+06	0	0.007585	1710748	9102.34	9.12468e+10	1.11664e+11
qe	Medium	sPPVYSDISR	2	11	N-Term(Dimethyl)	1	1	YNL055C	POR1	0	2	1	574.8	1148.59	-1.13603	HCD	20.1057	250	44.1992	11799	qExPlus02_00983.raw	15.04	35	28	4.76674e+06	0.01252	0.1734	4.76674e+06	5.51128e+06	9.12516e+10	1.11669e+11
qe	High	sPPVYSDISR	2	11	N-Term(Dimethyl)	1	1	YNL055C	POR1	0	2	1	574.797	1148.59	-6.44992	HCD	0	250	45.0242	11997	qExPlus02_00983.raw	26.33	36	29	1.69872e+06	0.008407	0.1287	1.29402e+06	9102.34	9.12529e+10	1.11669e+11
qe	Medium	sPPVYSDISR	2	11	N-Term(Dimethyl)	1	1	YNL055C	POR1	0	2	1	574.8	1148.59	-2.41136	HCD	36.1116	188.536	45.5425	12125	qExPlus02_00983.raw	11.65	35	28	2.52702e+06	0.02047	0.2779	1.72226e+06	9102.34	9.12546e+10	1.11669e+11
qe	Medium	sPPVYSDISR	2	11	N-Term(Dimethyl)	1	1	YNL055C	POR1	0	2	1	574.801	1148.59	0.0330325	HCD	74.558	250	45.8628	12203	qExPlus02_00983.raw	7.07	36	29	3.07602e+06	0.01714	0.235	1.58793e+06	9102.34	9.12562e+10	1.11669e+11
qe	High	sPPVYSDISR	2	11	N-Term(Dimethyl:2H(6))	1	1	YNL055C	POR1	0	2	1	577.819	1154.63	-2.03072	HCD	14.9462	250	47.0469	12488	qExPlus02_00983.raw	25.14	33	26	1.22647e+06	0	0.06719	9102.34	754629	9.12562e+10	1.1167e+11
qe	High	sPPVYSDISR	2	11	N-Term(Dimethyl)	1	1	YNL055C	POR1	0	2	1	574.801	1148.59	0.13931	HCD	10.7962	250	48.3553	12819	qExPlus02_00983.raw	38.14	36	29	4.03369e+06	0	0.008251	3.46531e+06	1.98236e+06	9.12597e+10	1.11672e+11
qe	Medium	sPPVYSDISR	2	11	N-Term(Dimethyl)	1	1	YNL055C	POR1	0	2	1	574.801	1148.59	-0.0732455	HCD	55.5373	250	48.8794	12952	qExPlus02_00983.raw	16.63	36	29	3.47945e+06	0.01252	0.192	3.47945e+06	1.97186e+06	9.12631e+10	1.11674e+11
qe	High	sPPVYSDISR	2	11	N-Term(Dimethyl:2H(6))	1	1	YNL055C	POR1	0	2	1	577.819	1154.63	-0.550612	HCD	0	250	49.54	13109	qExPlus02_00983.raw	26.83	34	27	823882	0	0.05712	9102.34	386736	9.12631e+10	1.11674e+11
qe	High	sPPVYSDISR	2	11	N-Term(Dimethyl)	1	1	YNL055C	POR1	0	2	1	574.801	1148.59	-0.0732455	HCD	0	250	49.9115	13198	qExPlus02_00983.raw	25.09	36	29	2.73703e+06	0.007065	0.1113	2.32688e+06		9.12655e+10	1.11674e+11
qe	High	sPPVYSDISR	2	11	N-Term(Dimethyl:2H(6))	1	1	YNL055C	POR1	0	2	1	577.818	1154.63	-2.45361	HCD	0	250	51.7012	13640	qExPlus02_00983.raw	33.2	34	27	1.79734e+06	0	0.05949	1.99635e+06	1.79734e+06	9.12675e+10	1.11676e+11
qe	Medium	sPPVYSDISR	2	11	N-Term(Dimethyl:2H(6))	1	1	YNL055C	POR1	0	2	1	577.819	1154.63	-1.39639	HCD	43.6504	250	52.67	13902	qExPlus02_00983.raw	14.6	34	27	479341	0.01666	0.254			9.12675e+10	1.11676e+11
qe	Medium	sPPVYSDISR	2	11	N-Term(Dimethyl)	1	1	YNL055C	POR1	0	2	1	574.801	1148.59	0.245588	HCD	13.4979	250	52.7124	13912	qExPlus02_00983.raw	25.24	36	29	1.2721e+06	0.01366	0.2017			9.12675e+10	1.11676e+11
qe	High	sPPVYSDISR	2	11	N-Term(Dimethyl:2H(6))	1	1	YNL055C	POR1	0	2	1	577.82	1154.63	0.612333	HCD	14.4762	250	54.822	14405	qExPlus02_00983.raw	27.16	34	27	2.88892e+06	0.001946	0.08733	4.36068e+06	2.88892e+06	9.12718e+10	1.11679e+11
qe	High	sPPVYSDISR	2	11	N-Term(Dimethyl)	1	1	YNL055C	POR1	0	2	1	574.8	1148.59	-1.13603	HCD	18.683	250	57.1648	14981	qExPlus02_00983.raw	26.37	35	28	1.51279e+06	0.005141	0.0515	1.51279e+06	2.87629e+06	9.12733e+10	1.11682e+11
qe	High	sPPVYSDISR	2	11	N-Term(Dimethyl:2H(6))	1	1	YNL055C	POR1	0	2	1	577.819	1154.63	-0.867779	HCD	26.7481	250	58.2047	15240	qExPlus02_00983.raw	16.88	34	27	1.89674e+06	0.005861	0.1841	2.94673e+06	1.89674e+06	9.12763e+10	1.11684e+11
qe	High	sPPVYSDISR	2	11	N-Term(Dimethyl:2H(6))	1	1	YNL055C	POR1	0	2	1	577.819	1154.63	-0.656334	HCD	0	250	58.8874	15407	qExPlus02_00983.raw	23.18	34	27	1.92859e+06	0.005154	0.1667	2.02975e+06	1.92859e+06	9.12783e+10	1.11686e+11
qe	High	sPPVYSDISR	2	11	N-Term(Dimethyl:2H(6))	1	1	YNL055C	POR1	0	2	1	577.819	1154.63	-0.550612	HCD	22.6011	250	61.0595	15921	qExPlus02_00983.raw	5.19	34	27	1.43987e+06	0.004334	0.1577	1.94768e+06	1.17401e+06	9.12803e+10	1.11687e+11
qe	High	sPPVYSDISR	2	11	N-Term(Dimethyl:2H(6))	1	1	YNL055C	POR1	0	2	1	577.819	1154.63	-1.39639	HCD	0	250	62.2838	16204	qExPlus02_00983.raw	10.57	34	27	1.14482e+06	0.005861	0.1907	9102.34	870856	9.12803e+10	1.11688e+11
qe	Medium	sPPVYSDISR	2	11	N-Term(Dimethyl)	1	1	YNL055C	POR1	0	2	1	574.8	1148.59	-1.02975	HCD	0	250	63.0328	16391	qExPlus02_00983.raw	18.7	35	28	2.21295e+06	0.03503	0.3397	2.21295e+06	1.16017e+06	9.12825e+10	1.11689e+11
qe	Medium	sPPVYSDISR	2	11	N-Term(Dimethyl)	1	1	YNL055C	POR1	0	2	1	574.8	1148.59	-1.13603	HCD	0	250	63.3803	16474	qExPlus02_00983.raw	17.83	35	28	1.07395e+06	0.02286	0.2864	1.07395e+06	1.18086e+06	9.12836e+10	1.1169e+11
qe	High	sPPVYSDISR	2	11	N-Term(Dimethyl:2H(6))	1	1	YNL055C	POR1	0	2	1	577.819	1154.63	-0.867779	HCD	0	250	64.3272	16752	qExPlus02_00983.raw	9.68	34	27	1.24656e+06	0.002744	0.09834	1.78434e+06	1.24656e+06	9.12853e+10	1.11691e+11
qe	High	sPPVYSDISR	2	11	N-Term(Dimethyl)	1	1	YNL055C	POR1	0	2	1	574.801	1148.6	0.776978	HCD	0	250	70.7729	18282	qExPlus02_00983.raw	28.52	36	29	1.13089e+06	0.005141	0.06617	1.02347e+06	1.04984e+06	9.12864e+10	1.11693e+11
qe	High	sPPVYSDISR	2	11	N-Term(Dimethyl:2H(6))	1	1	YNL055C	POR1	0	2	1	577.818	1154.63	-2.66506	HCD	0	250	71.3968	18428	qExPlus02_00983.raw	20.48	34	27	1.98356e+06	0.001946	0.09012	1.28263e+06	1.89615e+06	9.12877e+10	1.11694e+11
qe	High	sPPVYSDISR	2	11	N-Term(Dimethyl:2H(6))	1	1	YNL055C	POR1	0	2	1	577.819	1154.63	-0.656334	HCD	0	250	73.0192	18813	qExPlus02_00983.raw	14.41	34	27	1.65599e+06	0.005861	0.1982	9102.34	1.53826e+06	9.12877e+10	1.11696e+11
qe	High	sPPVYSDISR	2	11	N-Term(Dimethyl:2H(6))	1	1	YNL055C	POR1	0	2	1	577.82	1154.63	-0.127723	HCD	6.44456	250	74.2016	19131	qExPlus02_00983.raw	21.56	34	27	576572	0.008287	0.2073		392563	9.12877e+10	1.11696e+11
qe	Medium	sPPVYSDISR	2	11	N-Term(Dimethyl)	1	1	YNL055C	POR1	0	2	1	574.8	1148.59	-2.09253	HCD	0	250	76.7245	19734	qExPlus02_00983.raw	12.63	35	28	1.94023e+06	0.04999	0.442	1.94023e+06	1.67037e+06	9.12896e+10	1.11698e+11
qe	Medium	sPPVYSDISR	2	11	N-Term(Dimethyl:2H(6))	1	1	YNL055C	POR1	0	2	1	577.819	1154.63	-0.762056	HCD	0	250	77.3013	19873	qExPlus02_00983.raw	13.02	34	27	1.0928e+06	0.01877	0.2688	9102.34	848518	9.12896e+10	1.11699e+11
qe	High	sPPVYSDISR	2	11	N-Term(Dimethyl:2H(6))	1	1	YNL055C	POR1	0	2	1	577.819	1154.63	-1.60783	HCD	0	250	85.0843	21713	qExPlus02_00983.raw	19.78	34	27	2.00606e+06	0	0.03893	1.06868e+06	1.86736e+06	9.12907e+10	1.11701e+11
qe	Medium	sPPVYSDISR	2	11	N-Term(Dimethyl)	1	1	YNL055C	POR1	0	2	1	574.8	1148.59	-0.923469	HCD	15.4442	250	88.0288	22408	qExPlus02_00983.raw	14.14	35	28	1.68867e+06	0.04335	0.4018	1.26229e+06	9102.34	9.12919e+10	1.11701e+11
qe	High	sPPVYSDISR	2	11	N-Term(Dimethyl)	1	1	YNL055C	POR1	0	2	1	574.8	1148.59	-1.45486	HCD	18.6314	250	27.7691	6879	qExPlus02_00984.raw	22.85	35	28	3.05493e+07	0.005141	0.06316	2.98255e+07	25040133	9.13218e+10	1.11726e+11
qe	Medium	sPPVYSDISR	2	11	N-Term(Dimethyl)	1	1	YNL055C	POR1	0	2	1	574.8	1148.59	-1.2423	HCD	16.6865	250	28.5314	6829	qExPlus02_00986.raw	10.28	35	28	906542	0.02901	0.3122	806973	657641	9.13226e+10	1.11726e+11
qe	Medium	sPPVYSDISR	2	11	N-Term(Dimethyl)	1	1	YNL055C	POR1	0	2	1	574.8	1148.59	-2.09253	HCD	5.98708	250	27.6294	6601	qExPlus02_00987.raw	18.77	35	28	3.76828e+06	0.01252	0.1726	3.76828e+06	2.98424e+06	9.13263e+10	1.11729e+11
qe	Medium	sPPVYSDISR	2	11	N-Term(Dimethyl)	1	1	YNL055C	POR1	0	2	1	574.801	1148.6	0.351866	HCD	8.40327	250	27.7014	6620	qExPlus02_00988.raw	11.05	36	29	1.11282e+06	0.04335	0.4017	1.11282e+06	1.50758e+06	9.13275e+10	1.11731e+11	9.13275e+10	1.11731e+11	1.22341
qe_Acetyl	High	sPPVYSDISR	2	11	N-Term(Acetyl)	1	1	YNL055C	POR1	0	2	1	581.789	1162.57	-2.08195	HCD	28.1556	93.4145	47.4468	12371	qExPlus02_00982.raw	45.46	35	28	1.55181e+08	0	0.03379			0	0	0	0
Fusion	Medium	sPPVYSDISR	2	11	N-Term(Dimethyl:2H(6))	1	1	YNL055C	POR1	0	2	1	577.819	1154.63	-1.07922	HCD	0	172.427	35.8908	19287	Fusion002161.raw	4.69	21	14	280595	0.04674	0.4082			0	0
Fusion	Medium	sPPVYSDISR	2	11	N-Term(Dimethyl)	1	1	YNL055C	POR1	0	2	1	574.801	1148.6	0.776978	HCD	0.126642	28.0929	73.022	30690	Fusion002161.raw	18.79	23	16	1.06812e+07	0.03977	0.4155	1.06812e+07	9.35786e+06	1.06812e+07	9.35786e+06
Fusion	Medium	sPPVYSDISR	2	11	N-Term(Dimethyl:2H(6))	1	1	YNL055C	POR1	0	2	1	577.82	1154.63	-0.127723	HCD	5.28805	28.183	49.6043	24800	Fusion002161.raw	8.47	21	14	19718391	0.03401	0.3217	2.18197e+07	19718391	3.25009e+07	2.90763e+07
Fusion	Medium	sPPVYSDISR	2	11	N-Term(Dimethyl:2H(6))	1	1	YNL055C	POR1	0	2	1	577.819	1154.63	-0.550612	HCD	5.1471	28.183	59.004	27175	Fusion002161.raw	24.28	21	14	9.99019e+06	0.02404	0.2225	1.09529e+07	9.99019e+06	4.34538e+07	3.90664e+07
Fusion	High	sPPVYSDISR	2	11	N-Term(Dimethyl:2H(6))	1	1	YNL055C	POR1	0	2	1	577.821	1154.64	2.51533	HCD	36.4661	250	32.9279	8557	Fusion002163.raw	22.7	21	14	1.30625e+06	0	0.07478	707172	1.30625e+06	4.41609e+07	4.03727e+07	4.41609e+07	4.03727e+07	0.914217
qe	High	aTAPILckQFkQSDQPR	32	48	N-Term(Dimethyl:2H(6)); C7(Carbamidomethyl); K8(Dimethyl:2H(6)); K11(Dimethyl:2H(6))	1	1	YBL064C	PRX1	2	3	1	697.42	2090.25	0.672459	HCD	9.85292	250	23.8088	5859	qExPlus02_00984.raw	45.64	34	27	9.05044e+06	0	9.915e-05	9102.34	4362460	9102.34	4362460	9102.34	4362460	479.268
qe	High	qDTLTEYDAFLFGIPTR	63	79	N-Term(Dimethyl)	1	1	YDR032C	PST2	0	2	1	1008.01	2015.01	0.352267	HCD	0	250	79.7908	20454	qExPlus02_00983.raw	109.05	35	28	7.17278e+06	0	6.997e-07	6615328	2.25608e+06	6615328	2.25608e+06	6615328	2.25608e+06	0.341039
qe_Acetyl	High	mFANVGFR	1	8	N-Term(Acetyl)	1	1	YHR076W	PTC7	0	2	1	492.24	983.473	-4.29854	HCD	17.6913	250	70.0963	18062	qExPlus02_00982.raw	22.21	32	25	1.57506e+06	0	0.04741			0	0	0	0
qe	High	aAAPWYIR	2	9	N-Term(Dimethyl)	1	1	YDL230W	PTP1	0	2	1	488.273	975.538	-2.6897	HCD	20.8684	250	39.0593	10574	qExPlus02_00983.raw	31.66	36	29	1.68364e+06	0.001683	0.03195	1.57692e+06	680850	1.57692e+06	680850	1.57692e+06	680850	0.43176
qe_Acetyl	High	sTIkVIEVYTQNGLR	2	16	N-Term(Acetyl); K4(Dimethyl)	1	1	YGR169C	PUS6	1	2	1	896.003	1791	-1.59596	HCD	31.221	250	62.5917	16278	qExPlus02_00983.raw	33.89	34	27	3.30679e+06	0	0.001897	1.43896e+06	19568.4	1.43896e+06	19568.4
qe_Acetyl	High	sTIkVIEVYTQNGLR	2	16	N-Term(Acetyl); K4(Dimethyl:2H(6))	1	1	YGR169C	PUS6	1	2	1	899.02	1797.03	-3.45992	HCD	0	250	60.578	15799	qExPlus02_00983.raw	51.57	33	26	7.92917e+06	0	6.565e-05	19568.4	3.51777e+06	1.45853e+06	3.53734e+06	1.45853e+06	3.53734e+06	2.42528
qe_Acetyl	High	mIASkSSLLVTkSR	1	14	N-Term(Acetyl); M1(Oxidation); K5(Dimethyl:2H(6)); K12(Dimethyl:2H(6))	1	1	YLR142W	PUT1	2	2	1	824.017	1647.03	0.751323	HCD	11.1903	250	30.5775	7600	qExPlus02_00984.raw	24.55	31	24	917225	0.001447	0.03717	19568.4	541483	19568.4	541483	19568.4	541483	27.6714
qe_Acetyl	High	mIASkSSLLVTkSR	1	14	N-Term(Acetyl); M1(Oxidation); K5(Dimethyl:2H(6)); K12(Dimethyl:2H(6))	1	1	YLR142W	PUT1	2	3	1	549.682	1647.03	2.3737	HCD	56.3778	250	30.5164	7585	qExPlus02_00984.raw	14.4	30	23	4.17216e+06	0	0.01177		1.80342e+06	0	1.80342e+06
qe_Acetyl	High	mIASkSSLLVTkSR	1	14	N-Term(Acetyl); M1(Oxidation); K5(Dimethyl:2H(6)); K12(Dimethyl:2H(6))	1	1	YLR142W	PUT1	2	3	1	549.681	1647.03	0.483755	HCD	17.4914	138.299	37.8093	9619	qExPlus02_00984.raw	43.67	31	24	8.42342e+06	0	3.289e-05	19568.4	3.60496e+06	19568.4	5.40838e+06
qe_Acetyl	High	mIASkSSLLVTkSR	1	14	N-Term(Acetyl); K5(Dimethyl:2H(6)); K12(Dimethyl:2H(6))	1	1	YLR142W	PUT1	2	3	1	544.348	1631.03	-0.907785	HCD	3.96141	47.6435	37.6411	9575	qExPlus02_00984.raw	52.84	30	23	6.42163e+07	0	5.827e-05	19568.4	18401400	39136.7	2.38098e+07	39136.7	2.38098e+07	608.374
Fusion_Acetyl	High	mIASkSSLLVTkSR	1	14	N-Term(Acetyl); K5(Dimethyl:2H(6)); K12(Dimethyl:2H(6))	1	1	YLR142W	PUT1	2	3	1	544.349	1631.03	-0.234204	ETD	11.9316	50	2.24653	1297	Fusion002161.raw	82.2	30	23	6.21056e+08	0	3.383e-05	2.12486e+08	6.21056e+08	2.12486e+08	6.21056e+08	2.12486e+08	6.21056e+08	2.9228
Fusion	High	aYTSHLSSkTGLHFGR	2	17	N-Term(Dimethyl); K9(Dimethyl)	1	1	YHR001W-A	QCR10	1	5	1	364.401	1817.98	5.69808	ETD	5.64588	50	28.2214	13299	Fusion002162.raw	28.18	25	18	2.63434e+07	0	0.2317	2.63434e+07	1.02398e+07	2.63434e+07	1.02398e+07	2.63434e+07	1.02398e+07	0.388705
qe_Acetyl	Medium	mLSAAR	1	6	N-Term(Acetyl); M1(Oxidation)	1	1	YPR191W	QCR2	0	1	1	706.353	706.353	-2.86846	HCD	0	178.503	22.7828	5572	qExPlus02_00982.raw	20.76	33	26	1.68589e+07	0.03309	0.2177			0	0
qe_Acetyl	Medium	mLSAAR	1	6	N-Term(Acetyl); M1(Oxidation)	1	1	YPR191W	QCR2	0	1	1	706.354	706.354	-2.2636	HCD	3.2684	44.9296	24.8924	6135	qExPlus02_00982.raw	21.16	34	27	60790916	0.02352	0.2243			0	0
qe_Acetyl	Medium	mLSAAR	1	6	N-Term(Acetyl)	1	1	YPR191W	QCR2	0	1	1	690.359	690.359	-1.81322	HCD	12.7274	250	37.1059	9442	qExPlus02_00984.raw	16.87	33	26	4.5266e+07	0.02618	0.2408			0	0
qe_Acetyl	Medium	mLSAAR	1	6	N-Term(Acetyl); M1(Oxidation)	1	1	YPR191W	QCR2	0	1	1	706.353	706.353	-2.69564	HCD	10.4836	106.558	30.6751	7700	qExPlus02_00982.raw	19.64	33	26	1.41894e+08	0.03944	0.2534			0	0
qe_Acetyl	Medium	mLSAAR	1	6	N-Term(Acetyl); M1(Oxidation)	1	1	YPR191W	QCR2	0	1	1	706.353	706.353	-3.04128	HCD	0	59.2076	37.3187	9541	qExPlus02_00982.raw	16.66	34	27	2.41307e+08	0.0206	0.2081			0	0
qe_Acetyl	Medium	mLSAAR	1	6	N-Term(Acetyl); M1(Oxidation)	1	1	YPR191W	QCR2	0	1	1	706.355	706.355	-0.449018	HCD	11.6042	250	37.9629	9735	qExPlus02_00982.raw	6.64	35	28	5.11419e+06	0.02819	0.2515			0	0	0	0
qe_Acetyl	Medium	mLSAAR	1	6	N-Term(Acetyl); M1(Oxidation)	1	1	YPR191W	QCR2	0	2	3	353.68	706.353	-3.31954	HCD	0	250	22.6267	5527	qExPlus02_00982.raw	11.47	33	26	1.78632e+06	0.02932	0.1946			0	0
qe_Acetyl	Medium	mLSAAR	1	6	N-Term(Acetyl); M1(Oxidation)	1	1	YPR191W	QCR2	0	2	1	353.68	706.353	-2.88749	HCD	0	250	35.1305	8915	qExPlus02_00982.raw	13.73	33	26	3.33743e+06	0.03468	0.2296			0	0
qe_Acetyl	Medium	mLSAAR	1	6	N-Term(Acetyl); M1(Oxidation)	1	1	YPR191W	QCR2	0	2	1	353.68	706.352	-3.9244	HCD	52.9361	250	33.4348	8454	qExPlus02_00982.raw	8.29	34	27	1.11093e+06	0.01654	0.159			0	0
qe_Acetyl	Medium	mLSAAR	1	6	N-Term(Acetyl); M1(Oxidation)	1	1	YPR191W	QCR2	0	2	1	353.68	706.353	-3.31954	HCD	15.6163	250	31.9088	8041	qExPlus02_00982.raw	20.94	33	26	5.51765e+06	0.04505	0.2776			0	0	0	0
qe_Acetyl	High	mLSAARLQFAQGSVR	1	15	N-Term(Acetyl)	1	1	YPR191W	QCR2	1	2	1	838.948	1676.89	-1.32384	HCD	0	250	56.7834	14889	qExPlus02_00983.raw	57.23	36	29	9.9863e+06	0.005022	0.08955			0	0	0	0
qe_Acetyl	High	mLSAARLQFAQGSVR	1	15	N-Term(Acetyl); M1(Oxidation)	1	1	YPR191W	QCR2	1	3	1	564.966	1692.88	-0.154274	HCD	7.91831	250	56.8262	14900	qExPlus02_00983.raw	35.99	35	28	6.53186e+06	0	0.01217			0	0
qe_Acetyl	High	mLSAARLQFAQGSVR	1	15	N-Term(Acetyl)	1	1	YPR191W	QCR2	1	3	1	559.634	1676.89	-0.967877	HCD	5.26044	250	56.703	14869	qExPlus02_00983.raw	47.62	35	28	1.71853e+07	0	0.004542			0	0	0	0
qe_Acetyl	High	mLSAARLQFAQGSVRR	1	16	N-Term(Acetyl); M1(Oxidation)	1	1	YPR191W	QCR2	2	3	1	617	1848.99	0.13597	HCD	22.9921	250	38.1718	9705	qExPlus02_00984.raw	7.63	35	28	4.70851e+06	0.002723	0.07828			0	0
qe_Acetyl	High	mLSAARLQFAQGSVRR	1	16	N-Term(Acetyl)	1	1	YPR191W	QCR2	2	3	1	611.668	1832.99	-1.40497	HCD	11.0148	97.7499	46.0977	11667	qExPlus02_00984.raw	24.68	36	29	7.92728e+06	0	0.04038			0	0	0	0
qe	Medium	rLQFAQGSVR	6	15	N-Term(Dimethyl:2H(6))	1	1	YPR191W	QCR2	1	2	1	598.364	1195.72	1.85635	HCD	32.2612	250	19.8616	4847	qExPlus02_00984.raw	16.34	34	27	2.25768e+06	0.02674	0.2954	9102.34	1.55573e+06	9102.34	1.55573e+06	9102.34	1.55573e+06	170.916
qe_Acetyl	High	lQFAQGSVR	7	15	N-Term(Acetyl)	1	1	YPR191W	QCR2	0	2	1	524.282	1047.56	-1.53065	HCD	9.02433	250	54.2185	14134	qExPlus02_00982.raw	21.19	35	28	2.79782e+06	0.001447	0.05983			0	0	0	0
Fusion_Acetyl	High	mLSAARLQFAQGSVRR	41	53	N-Term(Acetyl)	1	1	YPR191W	QCR2	2	3	1	611.669	1832.99	0.59292	ETD	1.86024	50	12.8367	7388	Fusion002161.raw	35.59	35	28	9.53802e+07	0	0.001021			0	0
Fusion_Acetyl	High	mLSAARLQFAQGSVRR	41	53	N-Term(Acetyl); M1(Oxidation)	1	1	YPR191W	QCR2	2	3	1	617.001	1848.99	0.631121	ETD	17.0333	50	2.86539	1658	Fusion002161.raw	38.98	35	28	1.12078e+08	0	0.002473			0	0	0	0
Fusion_Acetyl	High	yATkDGVAHLLNR	41	53	N-Term(Acetyl); K4(Dimethyl)	1	1	YPR191W	QCR2	1	3	1	509.948	1527.83	0.772971	ETD	7.79656	50	3.7235	2159	Fusion002161.raw	50.62	35	28	4.29462e+07	0	0.395339	4.28335e+07	2.5839e+07	4.28335e+07	2.5839e+07	4.28335e+07	2.5839e+07	0.603242
qe_Acetyl	High	fNFQNTNTR	54	62	N-Term(Acetyl)	1	1	YPR191W	QCR2	0	1	1	1183.54	1183.54	-3.60068	HCD	0	250	47.2991	12329	qExPlus02_00982.raw	43.15	32	25	3.5893e+06	0.001447	0.02201			0	0	0	0
qe_Acetyl	High	fNFQNTNTR	54	62	N-Term(Acetyl)	1	1	YPR191W	QCR2	0	2	1	592.277	1183.55	-2.3228	HCD	0	87.0715	47.3295	12337	qExPlus02_00982.raw	29.75	32	25	3.14225e+07	0	0.04611			0	0	0	0
qe_Acetyl	Medium	sALkLVR	63	69	N-Term(Acetyl); K4(Dimethyl)	1	1	YPR191W	QCR2	1	2	1	428.783	856.559	-2.2978	HCD	23.1068	169.789	33.711	9241	qExPlus02_00983.raw	21.7	31	24	1.29027e+07	0.01452	0.1415	1.29027e+07	7.9937e+06	1.29027e+07	7.9937e+06	1.29027e+07	7.9937e+06	0.619539
qe_Acetyl	Medium	sFTSIAR	4	10	N-Term(Acetyl)	1	1	YDR529C	QCR7	0	2	1	412.218	823.429	-2.53255	HCD	0	189.78	45.4472	11859	qExPlus02_00982.raw	37.4	33	26	5.83792e+06	0.01654	0.1749			0	0	0	0
qe	High	sFSSLYkTF	2	10	N-Term(Dimethyl:2H(6)); K7(Dimethyl:2H(6))	1	1	YGR183C	QCR9	1	2	1	574.342	1147.68	-2.40393	HCD	36.7043	250	47.1251	12506	qExPlus02_00983.raw	13.47	34	27	7.2606e+06	0.006652	0.2033		4511765	0	4511765	0	4511765
Fusion_Acetyl	High	sFSSLYkTFFkR	2	13	N-Term(Acetyl); K7(Dimethyl:2H(6)); K11(Dimethyl:2H(6))	1	1	YGR183C	QCR9	2	3	1	540.989	1620.95	-0.447618	ETD	15.259	50	30.3985	16795	Fusion002161.raw	27.7	34	27	4.16147e+06	0	0.03665	4.2242e+06	4.16147e+06	4.2242e+06	4.16147e+06	4.2242e+06	4.16147e+06	0.985151
qe_Acetyl	High	mISIkGTGR	1	9	N-Term(Acetyl); K5(Dimethyl:2H(6))	1	1	YDL104C	QRI7	1	2	1	519.815	1038.62	-2.59184	HCD	3.20573	124.573	35.3281	9650	qExPlus02_00983.raw	50.95	33	26	8.65854e+06	0	0.005783	19568.4	5.85959e+06	19568.4	5.85959e+06
qe_Acetyl	High	mISIkGTGR	1	9	N-Term(Acetyl); M1(Oxidation); K5(Dimethyl:2H(6))	1	1	YDL104C	QRI7	1	2	1	527.813	1054.62	-1.31908	HCD	35.5452	53.6651	25.8748	6618	qExPlus02_00983.raw	25.75	34	27	22614395	0.00508	0.09742	19568.4	15394244	39136.7	2.12538e+07	39136.7	2.12538e+07	543.066
qe_Acetyl	High	mFkHSTGILSR	1	11	N-Term(Acetyl); K3(Dimethyl:2H(6))	1	1	YOR286W	RDL2	1	2	1	676.884	1352.76	-0.780567	HCD	4.21206	35.2257	32.8636	8234	qExPlus02_00984.raw	29.43	34	27	16426102	0	0.003763	19568.4	8473082	19568.4	8473082	19568.4	8473082	432.999
qe	Medium	sNDTIQSDTVR	5	15	N-Term(Dimethyl)	1	1	YPL167C	REV3	0	2	1	632.314	1263.62	3.14435	HCD	0	172.715	29.8328	8046	qExPlus02_00983.raw	14.35	34	27	43707288	0.01546	0.2263	43707288	3.92389e+07	43707288	3.92389e+07	43707288	3.92389e+07	0.897766
qe	High	mkWLLFPAR	1	9	N-Term(Dimethyl:2H(6)); K2(Dimethyl:2H(6))	1	1	YLR059C	REX2	1	2	1	615.402	1229.8	-1.6148	HCD	9.74651	250	51.6695	13044	qExPlus02_00984.raw	30.23	33	26	741196	0	0.003659	9102.34	586919	9102.34	586919
qe	High	mkWLLFPAR	1	9	N-Term(Dimethyl:2H(6)); K2(Dimethyl:2H(6))	1	1	YLR059C	REX2	1	2	1	615.402	1229.8	-1.81332	HCD	0	250	52.0446	13137	qExPlus02_00984.raw	17.72	33	26	1.20242e+06	0	0.02823	9102.34	789345	18204.7	1.37626e+06
qe	High	mkWLLFPAR	1	9	N-Term(Dimethyl:2H(6)); K2(Dimethyl:2H(6))	1	1	YLR059C	REX2	1	2	1	615.402	1229.8	-1.31702	HCD	0	250	52.3301	13205	qExPlus02_00984.raw	27.9	33	26	710323	0	0.003497	9102.34	452342	27307	1.82861e+06	27307	1.82861e+06	66.9647
Fusion	Medium	mkWLLFPAR	1	9	N-Term(Dimethyl:2H(6)); K2(Dimethyl:2H(6))	1	1	YLR059C	REX2	1	3	1	410.605	1229.8	1.22801	HCD	5.70896	87.933	21.5696	12217	Fusion002161.raw	10.57	22	15	179203	0.02617	0.2359	3532.53	90496.6	3532.53	90496.6
Fusion	High	mkWLLFPAR	1	9	N-Term(Dimethyl:2H(6)); M1(Oxidation); K2(Dimethyl:2H(6))	1	1	YLR059C	REX2	1	3	1	415.937	1245.8	3.70171	HCD	8.09082	29.563	12.901	7424	Fusion002161.raw	27.04	22	15	5.88917e+06	0	0.05388	3532.53	2.81083e+06	7065.07	2.90132e+06
Fusion	High	mkWLLFPAR	1	9	N-Term(Dimethyl:2H(6)); K2(Dimethyl:2H(6))	1	1	YLR059C	REX2	1	3	1	410.605	1229.8	1.3769	ETD	5.29621	50	20.9488	11892	Fusion002161.raw	39.21	22	15	1.6821e+07	0	0.01765	3532.53	8687596	10597.6	1.15889e+07
Fusion	High	mkWLLFPAR	1	9	N-Term(Dimethyl:2H(6)); M1(Oxidation); K2(Dimethyl:2H(6))	1	1	YLR059C	REX2	1	3	1	415.936	1245.79	0.174209	HCD	4.37494	40.0123	12.3114	7085	Fusion002161.raw	22.93	22	15	5.96378e+06	0	0.1006	3532.53	3315859	14130.1	1.49048e+07	14130.1	1.49048e+07	1054.82
qe_Acetyl	High	sQQVGNSIR	2	10	N-Term(Acetyl)	1	1	YPR165W	RHO1	0	1	1	1030.53	1030.53	-2.49706	HCD	0	250	24.3954	6001	qExPlus02_00982.raw	42.7	35	28	8.25792e+07	0.001447	0.02487			0	0	0	0
qe_Acetyl	High	sQQVGNSIR	2	10	N-Term(Acetyl)	1	1	YPR165W	RHO1	0	2	1	515.766	1030.53	-1.85861	HCD	0.980691	2.49486	24.5754	6049	qExPlus02_00982.raw	46.37	35	28	1298183602	0.001447	0.01907			0	0
qe_Acetyl	High	sQQVGNSIR	2	10	N-Term(Acetyl)	1	1	YPR165W	RHO1	0	2	1	515.765	1030.52	-5.05687	HCD	0	250	25.3914	6261	qExPlus02_00982.raw	30.75	36	29	408335	0.005022	0.08824			0	0
qe_Acetyl	Medium	sQQVGNSIR	2	10	N-Term(Acetyl)	1	1	YPR165W	RHO1	0	2	1	515.766	1030.53	-2.09552	HCD	0	250	24.6234	6054	qExPlus02_00984.raw	31.1	35	28	8.5659e+06	0.01294	0.1277			0	0	0	0
qe_Acetyl	High	sQQVGNSIRR	2	11	N-Term(Acetyl)	1	1	YPR165W	RHO1	1	2	1	593.817	1186.63	-1.33646	HCD	38.281	113.761	17.1603	4209	qExPlus02_00983.raw	8.47	34	27	1.25998e+08	0.003945	0.08853			0	0	0	0
qe	High	dFSkMSIVGR	18	27	N-Term(Dimethyl:2H(6)); K4(Dimethyl:2H(6))	1	1	YCR028C-A	RIM1	1	1	1	1207.72	1207.72	-2.29887	HCD	52.1853	250	38.8352	9871	qExPlus02_00984.raw	53.96	35	28	5.36549e+06	0	0.002038	9102.34	4.45866e+06	9102.34	4.45866e+06
qe	Medium	dFSkmSIVGR	18	27	N-Term(Dimethyl:2H(6)); K4(Dimethyl:2H(6)); M5(Oxidation)	1	1	YCR028C-A	RIM1	1	1	1	1223.72	1223.72	-3.99891	HCD	0	250	38.878	9881	qExPlus02_00984.raw	48.81	34	27	5.0678e+06	0.01148	0.2203	9102.34	3428372	18204.7	7.88703e+06
qe	High	dFSkMSIVGR	18	27	N-Term(Dimethyl); K4(Dimethyl)	1	1	YCR028C-A	RIM1	1	1	1	1195.65	1195.65	-1.90984	HCD	0	142.661	38.9946	9918	qExPlus02_00984.raw	53.83	35	28	8.87316e+06	0	0.001063	8.87316e+06	2.20595e+07	8.89137e+06	2.99466e+07
qe	High	dFSkmSIVGR	18	27	N-Term(Dimethyl); K4(Dimethyl); M5(Oxidation)	1	1	YCR028C-A	RIM1	1	1	1	1211.64	1211.64	-2.42299	HCD	0	250	39.076	9947	qExPlus02_00984.raw	44.33	35	28	6.72676e+06	0	0.01031	3992700	9102.34	1.28841e+07	2.99557e+07	1.28841e+07	2.99557e+07	2.32502
qe	High	dFSkmSIVGR	18	27	N-Term(Dimethyl:2H(6)); K4(Dimethyl:2H(6)); M5(Oxidation)	1	1	YCR028C-A	RIM1	1	2	1	612.363	1223.72	-1.06717	HCD	35.8906	250	26.9964	6671	qExPlus02_00984.raw	9.32	34	27	5.45919e+07	0	0.03074	9102.34	25823976	9102.34	25823976
qe	High	dFSkmSIVGR	18	27	N-Term(Dimethyl); K4(Dimethyl); M5(Oxidation)	1	1	YCR028C-A	RIM1	1	2	1	606.325	1211.64	-1.47699	HCD	2.76827	29.5026	27.3876	6771	qExPlus02_00984.raw	57.81	34	27	1.54554e+08	0.0008655	0.0232			9102.34	25823976
qe	High	dFSkmSIVGR	18	27	N-Term(Dimethyl:2H(6)); K4(Dimethyl:2H(6)); M5(Oxidation)	1	1	YCR028C-A	RIM1	1	2	1	612.363	1223.72	-2.16446	HCD	24.0626	51.7895	27.4971	6798	qExPlus02_00984.raw	26.91	34	27	9.85744e+06	0	0.05137	9102.34	4.24393e+06	18204.7	3.00679e+07
qe	High	dFSkmSIVGR	18	27	N-Term(Dimethyl); K4(Dimethyl); M5(Oxidation)	1	1	YCR028C-A	RIM1	1	2	1	606.325	1211.64	-1.77923	HCD	54.5979	92.0615	28.0892	6962	qExPlus02_00984.raw	12.37	35	28	1.81154e+07	0.008862	0.1551	1.78282e+07	1.24193e+07	1.78464e+07	4.24872e+07
qe	High	dFSkmSIVGR	18	27	N-Term(Dimethyl:2H(6)); K4(Dimethyl:2H(6)); M5(Oxidation)	1	1	YCR028C-A	RIM1	1	2	1	612.362	1223.72	-3.56101	HCD	26.7064	238.7	29.5546	7338	qExPlus02_00984.raw	15.37	35	28	4.73811e+06	0.005861	0.1794	6.57714e+06	4.73811e+06	2.44236e+07	4.72254e+07
qe	High	dFSkmSIVGR	18	27	N-Term(Dimethyl); K4(Dimethyl); M5(Oxidation)	1	1	YCR028C-A	RIM1	1	2	1	606.326	1211.64	-1.074	HCD	4.30952	122.118	30.2819	7530	qExPlus02_00984.raw	56.66	35	28	2.09203e+07	0.005141	0.05091	2.01239e+07	1.76058e+07	4.45475e+07	6.48311e+07
qe	High	dFSkmSIVGR	18	27	N-Term(Dimethyl:2H(6)); K4(Dimethyl:2H(6)); M5(Oxidation)	1	1	YCR028C-A	RIM1	1	2	1	612.363	1223.72	-2.16446	HCD	32.724	84.094	30.6382	7615	qExPlus02_00984.raw	11.02	34	27	7.23162e+06	0.001946	0.07712	1.3534e+07	7.23162e+06	5.80814e+07	7.20628e+07
qe	High	dFSkmSIVGR	18	27	N-Term(Dimethyl); K4(Dimethyl); M5(Oxidation)	1	1	YCR028C-A	RIM1	1	2	1	606.324	1211.64	-3.99568	HCD	58.0595	217.717	31.4548	7855	qExPlus02_00984.raw	30.9	35	28	5.36941e+06	0.0008655	0.01283	3703705	9102.34	6.17851e+07	7.20719e+07
qe	High	dFSkmSIVGR	18	27	N-Term(Dimethyl); K4(Dimethyl); M5(Oxidation)	1	1	YCR028C-A	RIM1	1	2	1	606.325	1211.64	-1.98072	HCD	19.3515	250	32.9925	8283	qExPlus02_00984.raw	28.66	35	28	6.33541e+06	0.008862	0.1302	5.90161e+06	4.61709e+06	6.76868e+07	7.6689e+07
qe	High	dFSkmSIVGR	18	27	N-Term(Dimethyl); K4(Dimethyl); M5(Oxidation)	1	1	YCR028C-A	RIM1	1	2	1	606.325	1211.64	-1.47699	HCD	0	250	34.1171	8638	qExPlus02_00984.raw	55.36	34	27	3.97466e+06	0.0008655	0.01771	3.97466e+06	2.70927e+06	7.16614e+07	7.93982e+07
qe	High	dFSkmSIVGR	18	27	N-Term(Dimethyl); K4(Dimethyl); M5(Oxidation)	1	1	YCR028C-A	RIM1	1	2	1	606.326	1211.64	-0.469511	HCD	31.9783	238.702	37.728	9598	qExPlus02_00984.raw	29.38	35	28	3.41011e+06	0.002522	0.03443		3981944	7.16614e+07	8.33802e+07
qe	High	dFSkmSIVGR	18	27	N-Term(Dimethyl:2H(6)); K4(Dimethyl:2H(6)); M5(Oxidation)	1	1	YCR028C-A	RIM1	1	2	1	612.364	1223.72	-0.568405	HCD	39.6486	250	38.5422	9795	qExPlus02_00984.raw	2.52	34	27	4.39681e+06	0.009045	0.2091	8.76425e+06	4.39681e+06	8.04257e+07	8.7777e+07
qe	High	dFSkmSIVGR	18	27	N-Term(Dimethyl:2H(6)); K4(Dimethyl:2H(6)); M5(Oxidation)	1	1	YCR028C-A	RIM1	1	2	1	612.364	1223.72	-0.668158	HCD	5.32982	5.66922	38.809	9862	qExPlus02_00984.raw	37.23	34	27	8.87281e+08	0	0.01302	9102.34	467939904	8.04348e+07	5.55717e+08
qe	High	dFSkMSIVGR	18	27	N-Term(Dimethyl); K4(Dimethyl)	1	1	YCR028C-A	RIM1	1	2	1	598.329	1195.65	0.580249	HCD	41.7201	17.1753	38.9509	9904	qExPlus02_00984.raw	45.43	36	29	4.70471e+08	0	0.006794	4.70471e+08	9.92112e+08	5.50906e+08	1.54783e+09
qe	High	dFSkmSIVGR	18	27	N-Term(Dimethyl); K4(Dimethyl); M5(Oxidation)	1	1	YCR028C-A	RIM1	1	2	1	606.326	1211.64	-0.368764	HCD	4.32322	2.00383	39.0331	9929	qExPlus02_00984.raw	63.27	35	28	8.99787e+08	0.001683	0.0307	899014835	3.06833e+07	1.44992e+09	1.57851e+09
qe	High	dFSkMSIVGR	18	27	N-Term(Dimethyl); K4(Dimethyl)	1	1	YCR028C-A	RIM1	1	2	1	598.33	1195.65	1.7033	HCD	1.86446	16.8404	39.2106	9985	qExPlus02_00984.raw	62.79	35	28	2.91495e+08	0	6.032e-05	234588464	2.67403e+06	1.68451e+09	1.58119e+09
qe	High	dFSkmSIVGR	18	27	N-Term(Dimethyl); K4(Dimethyl); M5(Oxidation)	1	1	YCR028C-A	RIM1	1	2	1	606.326	1211.64	-0.268016	HCD	2.3099	13.2645	39.302	10007	qExPlus02_00984.raw	65.09	35	28	2.16175e+07	0.004135	0.03448	2.16175e+07	7.58557e+06	1.70613e+09	1.58877e+09
qe	High	dFSkMSIVGR	18	27	N-Term(Dimethyl:2H(6)); K4(Dimethyl:2H(6))	1	1	YCR028C-A	RIM1	1	2	1	604.365	1207.72	-1.65302	HCD	7.72703	32.744	39.4825	10051	qExPlus02_00984.raw	51.08	34	28	3.15549e+07	0	0.0005981	7.66007e+07	3.15549e+07	1.78273e+09	1.62033e+09
qe	Medium	dFSkmSIVGR	18	27	N-Term(Dimethyl:2H(6)); K4(Dimethyl:2H(6)); M5(Oxidation)	1	1	YCR028C-A	RIM1	1	2	1	612.363	1223.72	-1.46619	HCD	38.5894	250	39.6347	10093	qExPlus02_00984.raw	17.28	34	27	4.55429e+06	0.01666	0.249	7095736	4.55429e+06	1.78982e+09	1.62488e+09
qe	High	dFSkMSIVGR	18	27	N-Term(Dimethyl); K4(Dimethyl)	1	1	YCR028C-A	RIM1	1	2	1	598.328	1195.65	-0.849085	HCD	1.18194	33.1788	39.7515	10121	qExPlus02_00984.raw	57.38	36	29	1.31296e+07	0	8.965e-05	1.31296e+07	5.63089e+06	1.80295e+09	1.63051e+09
qe	High	dFSkmSIVGR	18	27	N-Term(Dimethyl); K4(Dimethyl); M5(Oxidation)	1	1	YCR028C-A	RIM1	1	2	1	606.327	1211.65	1.54544	HCD	18.434	250	39.9122	10161	qExPlus02_00984.raw	17.47	34	27	957832	0.008407	0.1284		782680	1.80295e+09	1.63129e+09
qe	High	dFSkMSIVGR	18	27	N-Term(Dimethyl); K4(Dimethyl)	1	1	YCR028C-A	RIM1	1	2	1	598.329	1195.65	-0.0323226	HCD	35.3617	250	40.0403	10190	qExPlus02_00984.raw	28.63	36	29	2.00736e+06	0	0.01059	1694782		1.80465e+09	1.63129e+09
qe	Medium	dFSkMSIVGR	18	27	N-Term(Dimethyl); K4(Dimethyl)	1	1	YCR028C-A	RIM1	1	2	1	598.328	1195.65	-1.87004	HCD	5.45951	92.9969	41.0816	10449	qExPlus02_00984.raw	15.34	35	28	2.94703e+06	0.01252	0.1648	1745904		1.80639e+09	1.63129e+09	1.80639e+09	1.63129e+09	0.903067
qe_Acetyl	High	yLkYSIASQPR	43	53	N-Term(Acetyl); K3(Dimethyl:2H(6))	1	1	YCR028C-A	RIM1	1	2	1	701.402	1401.8	-2.80867	HCD	0	250	42.5884	11416	qExPlus02_00983.raw	39.81	34	27	867873	0	0.002158	534191	867873	534191	867873	534191	867873	1.62465
qe	High	iSQSLLASkSTYR	23	35	N-Term(Dimethyl); K9(Dimethyl)	1	1	YEL024W	RIP1	1	2	1	755.435	1509.86	-1.01493	HCD	0	33.3994	25.0804	6193	qExPlus02_00984.raw	83.98	35	28	720666335	0	2.012e-07	720666335	7.95104e+08	720666335	7.95104e+08
qe	High	iSQSLLASkSTYR	23	35	N-Term(Dimethyl); K9(Dimethyl)	1	1	YEL024W	RIP1	1	2	1	755.435	1509.86	-0.287292	HCD	0	250	25.3401	6254	qExPlus02_00984.raw	90.37	35	28	1788943	0	3.421e-05	1788943	2.91434e+06	722455278	7.98019e+08
qe	High	iSQSLLASkSTYR	23	35	N-Term(Dimethyl:2H(6)); K9(Dimethyl:2H(6))	1	1	YEL024W	RIP1	1	2	1	761.47	1521.93	-3.97757	HCD	49.3913	250	25.5501	6317	qExPlus02_00984.raw	40.72	34	27	68915614	0	0.0003849	9102.34	40896924	7.22464e+08	8.38916e+08
qe	High	iSQSLLASkSTYR	23	35	N-Term(Dimethyl:2H(6)); K9(Dimethyl:2H(6))	1	1	YEL024W	RIP1	1	2	1	761.473	1521.94	-0.528668	HCD	72.7699	250	26.1219	6461	qExPlus02_00984.raw	20.1	33	26	671255	0	0.03313	386621	671255	7.22851e+08	8.39587e+08
qe	High	iSQSLLASkSTYR	23	35	N-Term(Dimethyl:2H(6)); K9(Dimethyl:2H(6))	1	1	YEL024W	RIP1	1	2	1	761.472	1521.94	-1.57136	HCD	0	250	26.4206	6534	qExPlus02_00984.raw	18.7	34	27	1.34423e+06	0.005861	0.1812			7.22851e+08	8.39587e+08
qe	High	iSQSLLASkSTYR	23	35	N-Term(Dimethyl:2H(6)); K9(Dimethyl:2H(6))	1	1	YEL024W	RIP1	1	2	1	761.472	1521.94	-1.81198	HCD	0	250	28.1559	6981	qExPlus02_00984.raw	26.22	34	27	6.20978e+06	0	0.01325		3.01248e+06	7.22851e+08	8.42599e+08	7.22851e+08	8.42599e+08	1.16566
qe	High	iSQSLLASkSTYR	23	35	N-Term(Dimethyl); K9(Dimethyl)	1	1	YEL024W	RIP1	1	3	1	503.957	1509.86	-4.07587	HCD		95.1383	24.8817	6138	qExPlus02_00984.raw	27.99	35	28	2583005	0.0008655	0.01753		85507384	0	85507384
qe	High	iSQSLLASkSTYR	23	35	N-Term(Dimethyl:2H(6)); K9(Dimethyl:2H(6))	1	1	YEL024W	RIP1	1	3	1	507.984	1521.94	-0.898435	HCD	11.7864	66.1427	25.0125	6176	qExPlus02_00984.raw	38.61	33	26	5.81518e+07	0	0.003459	2.84087e+07	5.81518e+07	2.84087e+07	1.43659e+08
qe	High	iSQSLLASkSTYR	23	35	N-Term(Dimethyl:2H(6)); K9(Dimethyl:2H(6))	1	1	YEL024W	RIP1	1	3	1	507.984	1521.94	-0.236726	HCD	8.17359	250	25.3087	6246	qExPlus02_00984.raw	40.13	33	26	1.3382e+06	0	0.0001314	522383	1.03885e+06	2.89311e+07	1.44698e+08
qe	High	iSQSLLASkSTYR	23	35	N-Term(Dimethyl:2H(6)); K9(Dimethyl:2H(6))	1	1	YEL024W	RIP1	1	3	1	507.984	1521.94	-0.778124	HCD	53.9937	250	25.6283	6336	qExPlus02_00984.raw	13.46	33	26	873863	0	0.04244	9102.34	644901	2.89402e+07	1.45343e+08	2.89402e+07	1.45343e+08	5.02219
qe	High	mLVLGSLR	1	8	N-Term(Dimethyl:2H(6)); M1(Oxidation)	1	1	YEL050C	RML2	0	2	1	469.801	938.595	-2.74381	HCD	0	250	39.0987	10585	qExPlus02_00983.raw	25.4	31	24	5.07601e+06	0.002744	0.09633	9102.34	3365242	9102.34	3365242
qe	High	mLVLGSLR	1	8	N-Term(Dimethyl:2H(6)); M1(Oxidation)	1	1	YEL050C	RML2	0	2	1	469.801	938.595	-2.87387	HCD	47.09	173.913	39.4194	10665	qExPlus02_00983.raw	34.6	31	24	5.85209e+06	0	0.04726	9102.34	4160618	18204.7	7525860	18204.7	7525860	413.402
Fusion	Medium	kTATSFFDSSYQYLR	20	34	N-Term(Dimethyl:2H(6)); K1(Dimethyl:2H(6))	1	1	YML091C	RPM2	1	3	1	628.009	1882.01	-0.486437	HCD	22.213	39.133	11.2676	6493	Fusion002161.raw	15.87	22	15	4.77644e+06	0.02617	0.2458	1.37444e+06	3.07866e+06	1.37444e+06	3.07866e+06	1.37444e+06	3.07866e+06	2.23993
qe	High	vGQQYSSAPLR	2	12	N-Term(Dimethyl)	1	1	YDL140C	RPO21	0	2	1	617.332	1233.66	-0.88603	HCD	7.42592	250	22.1336	5501	qExPlus02_00983.raw	36.7	36	29	5.68491e+06	0.0008655	0.01464	5.12226e+06	1.46475e+06	5.12226e+06	1.46475e+06	5.12226e+06	1.46475e+06	0.285959
Fusion_Acetyl	High	mLRPAYkSLVkTSLLQR	1	17	N-Term(Acetyl); K7(Dimethyl:2H(6)); K11(Dimethyl:2H(6))	1	1	YFL036W	RPO41	2	4	1	529.338	2114.33	1.10655	ETD	46.2475	50	13.4336	7715	Fusion002161.raw	33.28	27	20	1.51407e+07	0	0.0002437	2297.14	4970686	2297.14	4970686	2297.14	4970686	2163.86
qe_Acetyl	High	sLVVQEQGSFQHILR	2	16	N-Term(Acetyl)	1	1	YDR450W	RPS18A	0	2	1	891.978	1782.95	-0.932468	HCD	0	250	58.373	15278	qExPlus02_00983.raw	81.27	35	28	1.69981e+08	0	1.48e-05			0	0	0	0
qe_Acetyl	High	sLVVQEQGSFQHILR	2	16	N-Term(Acetyl)	1	1	YDR450W	RPS18A	0	3	1	594.988	1782.95	0.531995	HCD	5.26417	250	58.4237	15290	qExPlus02_00983.raw	63.73	35	28	1.8219e+07	0	0.03199			0	0	0	0
qe_Acetyl	High	sDAVTIR	2	8	N-Term(Acetyl)	1	1	YER074W	RPS24A	0	1	1	803.423	803.423	-3.01044	HCD	0	250	33.0836	8358	qExPlus02_00982.raw	36.38	35	28	1.15578e+08	0.005022	0.09014			0	0	0	0
qe_Acetyl	High	sDAVTIR	2	8	N-Term(Acetyl)	1	1	YER074W	RPS24A	0	2	1	402.215	803.423	-3.25508	HCD	1.42282	20.9326	33.3162	8422	qExPlus02_00982.raw	44.26	33	26	188883410	0.003945	0.08769			0	0	0	0
qe	High	kVISNPLLAR	11	20	N-Term(Dimethyl); K1(Dimethyl)	1	1	YER074W	RPS24A	1	2	1	583.885	1166.76	0.571386	HCD	0	250	28.3407	7026	qExPlus02_00984.raw	19.94	27	20	2.37616e+06	0.007065	0.1079	2.1703e+06	1.05604e+06	2.1703e+06	1.05604e+06	2.1703e+06	1.05604e+06	0.486588
qe_Acetyl	High	mLRNTIALR	1	9	N-Term(Acetyl)	1	1	YDR041W	RSM10	1	2	1	565.328	1129.65	-2.1298	HCD		250	45.7967	12188	qExPlus02_00983.raw	19.2	33	26	2.01839e+06	0.00508	0.09666			0	0	0	0
qe	Medium	sILPQNVR	7	14	N-Term(Dimethyl:2H(6))	1	1	YKL155C	RSM22	0	2	1	480.809	960.61	-0.621427	HCD	32.9861	197.886	28.244	7504	qExPlus02_00983.raw	11.43	34	27	8.18508e+06	0.01602	0.237		5838963	0	5838963	0	5838963
qe	High	mkIQTNAVNVLQR	1	13	N-Term(Dimethyl:2H(6)); M1(Oxidation); K2(Dimethyl:2H(6))	1	1	YIL093C	RSM25	1	2	1	799.992	1598.98	-2.19275	HCD	3.08033	202.506	26.9283	6654	qExPlus02_00984.raw	55.23	34	27	6.93134e+06	0	0.0004044	9102.34	2823602	9102.34	2823602
qe	High	mkIQTNAVNVLQR	1	13	N-Term(Dimethyl:2H(6)); M1(Oxidation); K2(Dimethyl:2H(6))	1	1	YIL093C	RSM25	1	2	1	799.992	1598.98	-2.11641	HCD	0	250	27.2541	6738	qExPlus02_00984.raw	39.89	34	27	2.55555e+06	0	0.001028	9102.34	1.17876e+06	18204.7	4.00236e+06
qe	High	mkIQTNAVNVLQR	1	13	N-Term(Dimethyl); M1(Oxidation); K2(Dimethyl)	1	1	YIL093C	RSM25	1	2	1	793.956	1586.9	-0.0526658	HCD	0	250	27.3719	6767	qExPlus02_00984.raw	44.94	35	28	2.29285e+06	0	0.0004625	2.29285e+06	2.46065e+06	2.31105e+06	6.46302e+06
qe	High	mkIQTNAVNVLQR	1	13	N-Term(Dimethyl:2H(6)); K2(Dimethyl:2H(6))	1	1	YIL093C	RSM25	1	2	1	791.995	1582.98	-2.11129	HCD	2.92315	69.0395	33.6951	8523	qExPlus02_00984.raw	57.88	34	27	2.26682e+07	0	7.044e-06	1.24193e+07	2.25393e+07	1.47304e+07	2.90024e+07
qe	High	mkIQTNAVNVLQR	1	13	N-Term(Dimethyl); M1(Oxidation); K2(Dimethyl)	1	1	YIL093C	RSM25	1	2	1	793.956	1586.91	0.408875	HCD	43.8139	250	33.8356	8566	qExPlus02_00984.raw	52.1	35	28	1.43196e+07	0	8.99e-05	1.43196e+07	1.82715e+07	2.905e+07	4.72739e+07	2.905e+07	4.72739e+07	1.62733
qe	High	mkIQTNAVNVLQR	1	13	N-Term(Dimethyl:2H(6)); M1(Oxidation); K2(Dimethyl:2H(6))	1	1	YIL093C	RSM25	1	3	1	533.664	1598.98	-0.903334	HCD	24.9334	250	26.8585	6637	qExPlus02_00984.raw	61.3	34	27	1.63243e+07	0	0.009127	9102.34	7.54954e+06	9102.34	7.54954e+06
qe	High	mkIQTNAVNVLQR	1	13	N-Term(Dimethyl); M1(Oxidation); K2(Dimethyl)	1	1	YIL093C	RSM25	1	3	1	529.638	1586.9	-2.94577	HCD	23.3622	250	27.0466	6685	qExPlus02_00984.raw	56.64	35	28	7852537	0	0.002948	7852537	2.46429e+06	7.86164e+06	1.00138e+07
qe	High	mkIQTNAVNVLQR	1	13	N-Term(Dimethyl:2H(6)); M1(Oxidation); K2(Dimethyl:2H(6))	1	1	YIL093C	RSM25	1	3	1	533.664	1598.98	-2.39201	HCD	17.286	250	27.2139	6728	qExPlus02_00984.raw	61.49	34	27	6.49805e+06	0	0.003757	1.42273e+06	5.78914e+06	9.28436e+06	1.5803e+07
qe	Medium	mkIQTNAVNVLQR	1	13	N-Term(Dimethyl:2H(6)); M1(Oxidation); K2(Dimethyl:2H(6))	1	1	YIL093C	RSM25	1	3	1	533.665	1598.98	-0.101736	HCD		250	33.6468	8508	qExPlus02_00984.raw	5.8	34	27	2.96954e+06	0.03266	0.3442	9102.34	1346898	9.29347e+06	1.71499e+07
qe	High	mkIQTNAVNVLQR	1	13	N-Term(Dimethyl:2H(6)); K2(Dimethyl:2H(6))	1	1	YIL093C	RSM25	1	3	1	528.333	1582.98	-0.731731	HCD	5.54787	51.4112	33.706	8528	qExPlus02_00984.raw	61.25	34	27	1.70959e+07	0	0.002201	6.44786e+06	1.68908e+07	1.57413e+07	3.40407e+07
qe	High	mkIQTNAVNVLQR	1	13	N-Term(Dimethyl); M1(Oxidation); K2(Dimethyl)	1	1	YIL093C	RSM25	1	3	1	529.64	1586.91	0.631173	HCD	42.1203	118.333	33.8042	8558	qExPlus02_00984.raw	81.51	35	28	2.75693e+07	0	0.0001758	2.75693e+07	3.59318e+07	4.33106e+07	6.99725e+07
qe	High	mkIQTNAVNVLQR	1	13	N-Term(Dimethyl); M1(Oxidation); K2(Dimethyl)	1	1	YIL093C	RSM25	1	3	1	529.639	1586.9	-1.44576	HCD	7.63836	193.51	34.072	8628	qExPlus02_00984.raw	60.15	35	28	1.34036e+07	0	0.002375	1.34036e+07	7.27394e+06	5.67142e+07	7.72464e+07	5.67142e+07	7.72464e+07	1.36203
qe	Medium	mLVFkR	1	6	N-Term(Dimethyl:2H(6)); M1(Oxidation); K5(Dimethyl:2H(6))	1	1	YJR101W	RSM26	1	2	1	439.308	877.608	-0.0554173	HCD	0	250	17.2316	4205	qExPlus02_00984.raw	22.35	32	25	1.66489e+06	0.04554	0.4031		1.16837e+06	0	1.16837e+06
qe	Medium	mLVFkR	1	6	N-Term(Dimethyl:2H(6)); M1(Oxidation); K5(Dimethyl:2H(6))	1	1	YJR101W	RSM26	1	2	1	439.308	877.609	0.570507	HCD	11.2663	250	17.5374	4278	qExPlus02_00984.raw	20.14	32	25	435884	0.02733	0.3021	9102.34	265191	9102.34	1.43356e+06
qe	High	mLVFkR	1	6	N-Term(Dimethyl:2H(6)); M1(Oxidation); K5(Dimethyl:2H(6))	1	1	YJR101W	RSM26	1	2	1	439.306	877.605	-3.60232	HCD	8.41927	250	22.0076	5379	qExPlus02_00984.raw	38.39	32	25	4.3516e+06	0.00358	0.1234	9102.34	3.25892e+06	18204.7	4.69248e+06
qe	Medium	mLVFkR	1	6	N-Term(Dimethyl:2H(6)); K5(Dimethyl:2H(6))	1	1	YJR101W	RSM26	1	2	1	431.309	861.61	-3.69134	HCD	29.6215	93.9951	22.0096	5380	qExPlus02_00984.raw	8.38	28	21	7087713	0.01666	0.2539	9102.34	5.03199e+06	27307	9.72447e+06	27307	9.72447e+06	356.116
qe_Acetyl	Medium	mLVFkR	1	6	N-Term(Acetyl); K5(Dimethyl:2H(6))	1	1	YJR101W	RSM26	1	2	1	435.28	869.554	-1.35816	HCD	19.8915	60.5875	47.0052	12478	qExPlus02_00983.raw	25.64	30	23	4.51394e+07	0.02654	0.1793	19568.4	29776122	19568.4	29776122
qe_Acetyl	Medium	mLVFkR	1	6	N-Term(Acetyl); M1(Oxidation); K5(Dimethyl:2H(6))	1	1	YJR101W	RSM26	1	2	1	443.277	885.547	-3.10409	HCD	0	162.132	34.4902	9437	qExPlus02_00983.raw	26.2	32	25	3.79694e+07	0.02589	0.1739	19568.4	26083194	39136.7	55859316	39136.7	55859316	1427.29
qe	High	sTSVTEDFINSILAR	15	29	N-Term(Dimethyl:2H(6))	1	1	YDR494W	RSM28	0	2	1	843.961	1686.91	-1.84314	HCD	6.64687	250	71.9227	18557	qExPlus02_00983.raw	96.02	35	28	4.81708e+07	0	0.0001689	4.44458e+07	4.81708e+07	4.44458e+07	4.81708e+07	4.44458e+07	4.81708e+07	1.08381
qe	Medium	sTSVTEDFINSILAR	15	29	N-Term(Dimethyl:2H(6))	1	1	YDR494W	RSM28	0	3	1	562.977	1686.92	-0.150584	HCD	0	250	72.0092	18577	qExPlus02_00983.raw	58.64	35	28	3.59121e+06	0.01666	0.2524	2.92614e+06	3.49474e+06	2.92614e+06	3.49474e+06	2.92614e+06	3.49474e+06	1.19432
qe_Acetyl	Medium	mLHcAR	1	6	N-Term(Acetyl); M1(Oxidation); C4(Carbamidomethyl)	1	1	YJR113C	RSM7	0	2	1	423.19	845.373	-3.46178	HCD	38.4366	250	15.1009	3662	qExPlus02_00983.raw	17.25	29	22	250276	0.0206	0.2057			0	0	0	0
qe	High	mFLQTLR	1	7	N-Term(Dimethyl:2H(6))	1	1	YPL183W-A	RTC6	0	1	1	942.57	942.57	-1.71374	HCD	0	250	39.5145	10687	qExPlus02_00983.raw	31.2	33	26	6.24877e+06	0.001946	0.08677	9102.34	4.23712e+06	9102.34	4.23712e+06	9102.34	4.23712e+06	465.498
qe	High	mFLQTLR	1	7	N-Term(Dimethyl:2H(6)); M1(Oxidation)	1	1	YPL183W-A	RTC6	0	2	1	479.786	958.564	-2.25233	HCD	26.1647	27.0052	32.972	9021	qExPlus02_00983.raw	18.46	34	27	1.6848e+07	0.005861	0.1978	9102.34	10555058	9102.34	10555058
qe	High	mFLQTLR	1	7	N-Term(Dimethyl:2H(6)); M1(Oxidation)	1	1	YPL183W-A	RTC6	0	2	1	479.786	958.564	-2.37967	HCD	3.01002	20.4695	33.2345	9115	qExPlus02_00983.raw	28.31	34	27	8.2008e+07	0.00358	0.1253	9102.34	45533656	18204.7	56088714
qe	High	mFLQTLR	1	7	N-Term(Dimethyl:2H(6))	1	1	YPL183W-A	RTC6	0	2	1	471.788	942.569	-2.11653	HCD	5.61196	199.403	39.7245	10736	qExPlus02_00983.raw	31.41	33	26	5.50961e+07	0.001946	0.08922	9102.34	32674750	27307	88763464
qe	High	mFLQTLR	1	7	N-Term(Dimethyl:2H(6)); M1(Oxidation)	1	1	YPL183W-A	RTC6	0	2	1	479.785	958.564	-2.63437	HCD	2.27264	250	39.4938	10682	qExPlus02_00983.raw	28.9	34	27	1.60071e+07	0.009045	0.2122	9102.34	9624083	36409.4	98387547	36409.4	98387547	2702.26
qe_Acetyl	High	mFLQTLR	1	7	N-Term(Acetyl)	1	1	YPL183W-A	RTC6	0	2	1	475.759	950.512	-1.15106	HCD	41.3514	250	75.6452	19415	qExPlus02_00982.raw	12.16	35	28	1.32649e+06	0.005022	0.08416			0	0	0	0
qe	High	vSSFSVPmPVkR	2	13	N-Term(Dimethyl:2H(6)); M8(Oxidation); K11(Dimethyl:2H(6))	1	1	YHR083W	SAM35	1	2	1	709.434	1417.86	-1.82956	HCD	8.47129	250	29.9002	7435	qExPlus02_00984.raw	20.53	35	28	1.03615e+07	0	0.006627	5.11289e+06	1.03615e+07	5.11289e+06	1.03615e+07
qe	High	vSSFSVPmPVkR	2	13	N-Term(Dimethyl:2H(6)); M8(Oxidation); K11(Dimethyl:2H(6))	1	1	YHR083W	SAM35	1	2	1	709.434	1417.86	-1.1408	HCD	0	250	30.4741	7575	qExPlus02_00984.raw	42.54	35	28	2.53914e+06	0	0.05697	1.23675e+06	2.53914e+06	6.34964e+06	1.29007e+07
qe	High	vSSFSVPMPVkR	2	13	N-Term(Dimethyl:2H(6)); K11(Dimethyl:2H(6))	1	1	YHR083W	SAM35	1	2	1	701.437	1401.87	-0.340197	HCD	5.04107	133.141	37.6035	9564	qExPlus02_00984.raw	36.22	35	28	1.91439e+08	0	0.01213	1.3445e+08	1.91439e+08	1.40799e+08	2.04339e+08
qe	High	vSSFSVPMPVkR	2	13	N-Term(Dimethyl); K11(Dimethyl)	1	1	YHR083W	SAM35	1	2	1	695.4	1389.79	0.450671	HCD	18.6688	173.094	37.8949	9640	qExPlus02_00984.raw	33.93	35	28	509081	0	0.006488		517187	1.40799e+08	2.04856e+08	1.40799e+08	2.04856e+08	1.45495
Fusion	High	vSSFSVPMPVkR	2	13	N-Term(Dimethyl:2H(6)); K11(Dimethyl:2H(6))	1	1	YHR083W	SAM35	1	2	1	701.437	1401.87	-0.601428	HCD	23.2159	31.888	2.51032	1453	Fusion002161.raw	46.61	25	18	1.10309e+07	0	0.003316	1.06862e+07	1.08129e+07	1.06862e+07	1.08129e+07	1.06862e+07	1.08129e+07	1.01186
qe	High	vSSFSVPmPVkR	2	13	N-Term(Dimethyl:2H(6)); M8(Oxidation); K11(Dimethyl:2H(6))	1	1	YHR083W	SAM35	1	3	1	473.292	1417.86	-0.956571	HCD	50.4471	250	30.5211	7586	qExPlus02_00984.raw	15.24	35	28	1.29435e+06	0.002744	0.1112	784914	1.10937e+06	784914	1.10937e+06
qe	High	vSSFSVPMPVkR	2	13	N-Term(Dimethyl:2H(6)); K11(Dimethyl:2H(6))	1	1	YHR083W	SAM35	1	3	1	467.96	1401.87	-1.41648	HCD	0	66.7267	37.645	9577	qExPlus02_00984.raw	31.9	35	28	2.35006e+07	0	0.000154	1.99232e+07	2.35006e+07	2.07081e+07	2.461e+07
qe	High	vSSFSVPmPVkR	2	13	N-Term(Dimethyl); M8(Oxidation); K11(Dimethyl)	1	1	YHR083W	SAM35	1	3	1	469.267	1405.79	-0.136579	HCD	21.9994	250	37.814	9620	qExPlus02_00984.raw	17.53	36	29	4.95991e+06	0.004135	0.03553	4.95991e+06	2.22955e+06	2.56681e+07	2.68395e+07	2.56681e+07	2.68395e+07	1.04564
Fusion	Medium	vSSFSVPMPVkR	2	13	N-Term(Dimethyl); K11(Dimethyl)	1	1	YHR083W	SAM35	1	3	1	463.935	1389.79	-0.261673	ETD	18.0246	50	3.04052	1760	Fusion002161.raw	48.23	25	18	119267288	0.04857	0.3956			0	0
Fusion	High	vSSFSVPMPVkR	2	13	N-Term(Dimethyl:2H(6)); K11(Dimethyl:2H(6))	1	1	YHR083W	SAM35	1	3	1	467.961	1401.87	-0.371558	HCD	22.8856	31.9029	3.03552	1756	Fusion002161.raw	30.57	25	18	6.63146e+08	0	0.0454	5.97408e+08	6.63146e+08	5.97408e+08	6.63146e+08	5.97408e+08	6.63146e+08	1.11004
Fusion	High	yEkGTDYEEDLAIVR	90	104	N-Term(Dimethyl:2H(6)); K3(Dimethyl:2H(6))	1	1	YMR060C	SAM37	1	3	1	623.672	1869	-0.616638	HCD	16.8922	38.923	2.7902	1613	Fusion002161.raw	45.5	23	16	1.22193e+07	0	0.002345	40361900	1.22193e+07	40361900	1.22193e+07	40361900	1.22193e+07	0.302744
qe_Acetyl	High	tSSSGVDNEISLDSPMPIFNESSTLkPIR	2	30	N-Term(Acetyl); K26(Dimethyl:2H(6))	1	1	YNL026W	SAM50	0	3	1	1066.54	3197.62	1.53306	HCD	4.50948	250	74.9974	19316	qExPlus02_00983.raw	47.39	35	28	6.52355e+06	0	1.011e-06	6.88037e+06	6.52355e+06	6.88037e+06	6.52355e+06	6.88037e+06	6.52355e+06	0.948139
qe_Acetyl	High	sGAAAASAAGYDR	2	14	N-Term(Acetyl)	1	1	YGL011C	SCL1	0	2	1	605.277	1209.55	-2.5985	HCD	32.3881	132.035	29.3957	7353	qExPlus02_00982.raw	55.31	32	25	4.87056e+07	0	0.006643			0	0	0	0
qe_Acetyl	High	tFTSSALVR	20	28	N-Term(Acetyl)	1	1	YKL148C	SDH1	0	2	1	512.276	1023.55	-1.5637	HCD	0	250	52.6985	13757	qExPlus02_00982.raw	53.68	35	28	3.73879e+06	0.0029	0.06782			0	0	0	0
qe	High	fTSSALVR	21	28	N-Term(Dimethyl:2H(6))	1	1	YKL148C	SDH1	0	1	1	914.556	914.556	-1.64171	HCD	11.1379	250	25.4924	6507	qExPlus02_00983.raw	45.96	33	26	102219658	0	0.001327	9102.34	63893700	9102.34	63893700	9102.34	63893700	7019.48
qe	High	fTSSALVR	21	28	N-Term(Dimethyl:2H(6))	1	1	YKL148C	SDH1	0	2	1	457.782	914.556	-1.52294	HCD	3.83457	19.7445	25.1812	6401	qExPlus02_00983.raw	16.28	33	26	8.33501e+08	0.002744	0.1049	9102.34	505559488	9102.34	505559488	9102.34	505559488	55541.7
qe	High	cISkLFPTR	80	88	N-Term(Dimethyl); C1(Carbamidomethyl); K4(Dimethyl)	1	1	YKL148C	SDH1	1	2	1	589.341	1177.67	-1.53859	HCD	41.3657	250	32.5417	8138	qExPlus02_00984.raw	18.89	36	29	4.88277e+06	0.004844	0.03932	2.42636e+06	9102.34	2.42636e+06	9102.34	2.42636e+06	9102.34	0.00375143
qe	Medium	mLNVLLR	1	7	N-Term(Dimethyl:2H(6))	1	1	YLL041C	SDH2	0	1	1	892.591	892.591	-1.31256	HCD	0	147.988	45.5866	12136	qExPlus02_00983.raw	38.71	32	25	1.62947e+07	0.03517	0.3602	9102.34	10685678	9102.34	10685678	9102.34	10685678	1173.95
qe	High	mLNVLLR	1	7	N-Term(Dimethyl:2H(6)); M1(Oxidation)	1	1	YLL041C	SDH2	0	2	1	454.796	908.586	-1.41761	HCD	6.25419	250	39.4479	10671	qExPlus02_00983.raw	35.02	32	25	2.09666e+07	0.004334	0.1413	9102.34	12987685	9102.34	12987685
qe	High	mLNVLLR	1	7	N-Term(Dimethyl:2H(6)); M1(Oxidation)	1	1	YLL041C	SDH2	0	2	1	454.796	908.585	-2.02219	HCD	5.70977	65.9663	39.7207	10735	qExPlus02_00983.raw	35.48	32	25	3.47582e+07	0.002744	0.1021	9102.34	18689116	18204.7	31676801
qe	High	mLNVLLR	1	7	N-Term(Dimethyl:2H(6)); M1(Oxidation)	1	1	YLL041C	SDH2	0	2	1	454.796	908.584	-2.69395	HCD	0	250	40.659	10961	qExPlus02_00983.raw	38.44	32	25	2.3674e+06	0.002744	0.1052	9102.34	1.43006e+06	27307	3.31069e+07
qe	High	mLNVLLR	1	7	N-Term(Dimethyl:2H(6))	1	1	YLL041C	SDH2	0	2	1	446.799	892.59	-1.80628	HCD	29.7847	105.994	45.5125	12118	qExPlus02_00983.raw	12.4	32	25	5.29213e+07	0.00358	0.1263	9102.34	31532970	36409.4	6.46398e+07
qe	High	mLNVLLR	1	7	N-Term(Dimethyl:2H(6)); M1(Oxidation)	1	1	YLL041C	SDH2	0	2	1	454.796	908.584	-2.69395	HCD	4.42707	230.955	45.591	12137	qExPlus02_00983.raw	35.22	32	25	7308691	0.004334	0.1599	9102.34	6.08301e+06	45511.7	7.07229e+07
qe	High	mLNVLLR	1	7	N-Term(Dimethyl:2H(6))	1	1	YLL041C	SDH2	0	2	1	446.799	892.591	-1.60115	HCD	26.9856	79.9807	45.7747	12182	qExPlus02_00983.raw	22.69	32	25	2.70762e+07	0.004334	0.1648	9102.34	17151156	54614	8.7874e+07	54614	8.7874e+07	1609
qe_Acetyl	High	mLNVLLR	1	7	N-Term(Acetyl)	1	1	YLL041C	SDH2	0	2	1	450.77	900.533	-1.06107	HCD	32.562	122.211	82.415	21062	qExPlus02_00982.raw	36.53	32	25	1.26442e+09	0.001447	0.03813			0	0
qe_Acetyl	High	mLNVLLR	1	7	N-Term(Acetyl); M1(Oxidation)	1	1	YLL041C	SDH2	0	2	1	458.767	916.527	-1.95405	HCD	42.5885	250	83.1118	21231	qExPlus02_00982.raw	39.93	32	25	347033	0.006155	0.1095			0	0
qe_Acetyl	High	mLNVLLR	1	7	N-Term(Acetyl); M1(Oxidation)	1	1	YLL041C	SDH2	0	2	1	458.767	916.528	-1.02174	HCD	0	250	81.5071	20843	qExPlus02_00982.raw	26.47	32	25	220055	0.001447	0.06081			0	0
qe_Acetyl	High	mLNVLLR	1	7	N-Term(Acetyl); M1(Oxidation)	1	1	YLL041C	SDH2	0	2	1	458.767	916.527	-1.28811	HCD	0	250	66.4058	16566	qExPlus02_00984.raw	26.09	32	25	202527	0.003945	0.091			0	0
qe_Acetyl	High	mLNVLLR	1	7	N-Term(Acetyl); M1(Oxidation)	1	1	YLL041C	SDH2	0	2	1	458.767	916.527	-2.08724	HCD	0	250	66.1499	16505	qExPlus02_00984.raw	45.72	32	25	3.91231e+06	0.00508	0.09494			0	0
qe_Acetyl	High	mLNVLLR	1	7	N-Term(Acetyl); M1(Oxidation)	1	1	YLL041C	SDH2	0	2	1	458.767	916.526	-2.95296	HCD	0	39.0849	66.3049	17145	qExPlus02_00982.raw	41.5	32	25	314550784	0.002723	0.08251			0	0
qe_Acetyl	High	mLNVLLR	1	7	N-Term(Acetyl); M1(Oxidation)	1	1	YLL041C	SDH2	0	2	1	458.766	916.525	-3.28593	HCD	0	250	68.2809	17626	qExPlus02_00982.raw	17.39	34	27	437855	0.006948	0.113			0	0
qe_Acetyl	High	mLNVLLR	1	7	N-Term(Acetyl); M1(Oxidation)	1	1	YLL041C	SDH2	0	2	1	458.767	916.526	-2.88636	HCD	0	250	70.1653	18079	qExPlus02_00982.raw	45.77	32	25	3924206	0.006155	0.1066			0	0
qe_Acetyl	Medium	mLNVLLR	1	7	N-Term(Acetyl); M1(Oxidation)	1	1	YLL041C	SDH2	0	2	1	458.767	916.527	-1.4213	HCD	29.3209	250	82.835	20498	qExPlus02_00984.raw	22.3	36	29	872685	0.01654	0.16			0	0
qe_Acetyl	Medium	mLNVLLR	1	7	N-Term(Acetyl); M1(Oxidation)	1	1	YLL041C	SDH2	0	2	1	458.767	916.527	-1.08833	HCD	0	250	65.9358	17144	qExPlus02_00983.raw	41.21	36	29	4.96833e+06	0.01654	0.1943			0	0
qe_Acetyl	Medium	mLNVLLR	1	7	N-Term(Acetyl); M1(Oxidation)	1	1	YLL041C	SDH2	0	2	1	458.768	916.53	1.30905	HCD	4.48848	250	65.782	17017	qExPlus02_00982.raw	41.35	36	29	8.63836e+08	0.01654	0.1906			0	0
qe_Acetyl	Medium	mLNVLLR	1	7	N-Term(Acetyl); M1(Oxidation)	1	1	YLL041C	SDH2	0	2	1	458.767	916.527	-1.55449	HCD	45.6868	167.11	82.8389	21164	qExPlus02_00982.raw	45.3	36	29	8.45023e+07	0.02308	0.2163			0	0
qe_Acetyl	Medium	mLNVLLR	1	7	N-Term(Acetyl); M1(Oxidation)	1	1	YLL041C	SDH2	0	2	1	458.766	916.526	-3.15274	HCD	28.5805	250	67.6591	17478	qExPlus02_00982.raw	31.01	34	27	446276	0.01654	0.1888			0	0
qe_Acetyl	Medium	mLNVLLR	1	7	N-Term(Acetyl); M1(Oxidation)	1	1	YLL041C	SDH2	0	2	1	458.767	916.527	-1.15492	HCD	0	250	78.7429	20169	qExPlus02_00982.raw	30.18	36	29	484553	0.01654	0.1589			0	0
qe_Acetyl	Medium	mLNVLLR	1	7	N-Term(Acetyl); M1(Oxidation)	1	1	YLL041C	SDH2	0	2	1	458.766	916.526	-3.01955	HCD	4.32842	250	69.6091	17944	qExPlus02_00982.raw	45.25	32	25	1.25671e+06	0.02106	0.1574			0	0	0	0
qe	High	mLNVLLRR	1	8	N-Term(Dimethyl:2H(6))	1	1	YLL041C	SDH2	1	2	1	524.85	1048.69	-0.466627	HCD	0	30.25	33.182	8343	qExPlus02_00984.raw	17.34	33	26	1.01028e+07	0.001946	0.07213	9102.34	7.93019e+06	9102.34	7.93019e+06	9102.34	7.93019e+06	871.226
qe_Acetyl	High	mLNVLLRR	1	8	N-Term(Acetyl)	1	1	YLL041C	SDH2	1	2	1	528.821	1056.63	-0.765798	HCD	0.887131	49.17	63.1223	16413	qExPlus02_00983.raw	24.13	33	26	1.57115e+08	0.001447	0.0335			0	0	0	0
qe	High	mATATTAAATHTPR	19	32	N-Term(Dimethyl:2H(6)); M1(Oxidation)	1	1	YLL041C	SDH2	0	2	1	725.877	1450.75	-8.15528	HCD	15.1615	250	11.4303	2756	qExPlus02_00984.raw	76.05	33	26	8.8526e+06	0	0.0007556	1.29066e+07	8.8526e+06	1.29066e+07	8.8526e+06
qe	High	mATATTAAATHTPR	19	32	N-Term(Dimethyl:2H(6)); M1(Oxidation)	1	1	YLL041C	SDH2	0	2	1	725.881	1450.75	-3.4433	HCD	3.59368	91.8996	11.6965	2819	qExPlus02_00984.raw	80.08	33	26	9.92509e+06	0	0.001307	2.69049e+07	9.92509e+06	3.98115e+07	1.87777e+07
qe	High	mATATTAAATHTPR	19	32	N-Term(Dimethyl:2H(6)); M1(Oxidation)	1	1	YLL041C	SDH2	0	2	1	725.881	1450.75	-3.02259	HCD	4.1264	250	11.9616	2886	qExPlus02_00984.raw	84.28	33	26	989124	0	0.0008158	9102.34	456715	3.98206e+07	1.92344e+07
qe	High	mATATTAAATHTPR	19	32	N-Term(Dimethyl:2H(6)); M1(Oxidation)	1	1	YLL041C	SDH2	0	2	1	725.88	1450.75	-4.0323	HCD	0	250	12.2448	2956	qExPlus02_00984.raw	88.56	33	26	175122	0	6.922e-05	922039		4.07427e+07	1.92344e+07
qe	High	mATATTAAATHTPR	19	32	N-Term(Dimethyl); M1(Oxidation)	1	1	YLL041C	SDH2	0	2	1	722.864	1444.72	0.0504079	HCD	0	250	12.2643	2960	qExPlus02_00984.raw	92.06	34	27	2.59244e+06	0	4.93e-08	2.59244e+06	1.93396e+06	4.33351e+07	2.11684e+07
qe	High	mATATTAAATHTPR	19	32	N-Term(Dimethyl:2H(6)); M1(Oxidation)	1	1	YLL041C	SDH2	0	2	1	725.881	1450.76	-2.68602	HCD	0	250	12.7012	3064	qExPlus02_00984.raw	94.46	33	26	126468	0	2.209e-05	9102.34	77654.6	4.33442e+07	2.1246e+07
qe	High	mATATTAAATHTPR	19	32	N-Term(Dimethyl:2H(6))	1	1	YLL041C	SDH2	0	2	1	717.883	1434.76	-3.19721	HCD	0	141.493	14.6086	3541	qExPlus02_00984.raw	88.75	34	27	5.80979e+07	0	1.96e-06	7.3855e+07	5.80979e+07	1.17199e+08	7.93439e+07
qe	High	mATATTAAATHTPR	19	32	N-Term(Dimethyl); M1(Oxidation)	1	1	YLL041C	SDH2	0	2	1	722.86	1444.71	-5.35721	HCD	0	193.602	14.7021	3565	qExPlus02_00984.raw	82.73	34	27	3.25299e+07	0	2.966e-05	3.25299e+07	2.52926e+07	1.49729e+08	1.04636e+08
qe	High	mATATTAAATHTPR	19	32	N-Term(Dimethyl)	1	1	YLL041C	SDH2	0	2	1	714.866	1428.73	-0.859503	HCD	13.7629	78.6203	14.9451	3628	qExPlus02_00984.raw	70.26	34	28	1.43485e+07	0	6.893e-06	1.39502e+07	3.71978e+06	1.63679e+08	1.08356e+08	1.63679e+08	1.08356e+08	0.662004
qe_Acetyl	High	mATATTAAATHTPR	19	32	N-Term(Acetyl)	1	1	YLL041C	SDH2	0	2	1	721.854	1442.7	-2.72439	HCD	0	250	13.9346	3356	qExPlus02_00984.raw	107.78	34	27	482009	0	3.322e-05			0	0	0	0
qe	High	mATATTAAATHTPR	19	32	N-Term(Dimethyl); M1(Oxidation)	1	1	YLL041C	SDH2	0	3	1	482.243	1444.71	-5.5355	HCD	80.6324	250	11.5456	2784	qExPlus02_00984.raw	35.16	34	27	99261.2	0.001683	0.03323		320353	0	320353
qe	High	mATATTAAATHTPR	19	32	N-Term(Dimethyl); M1(Oxidation)	1	1	YLL041C	SDH2	0	3	1	482.243	1444.72	-4.20472	HCD	49.0933	250	11.6755	2814	qExPlus02_00984.raw	59.56	34	27	995477	0	1.446e-05	617242		617242	320353	617242	320353	0.519007
qe	High	aTATTAAATHTPR	20	32	N-Term(Dimethyl)	1	1	YLL041C	SDH2	0	2	1	649.346	1297.68	-1.63773	HCD	0	250	9.99748	2410	qExPlus02_00983.raw	72.24	34	27	1.04776e+06	0	3.47e-06	1.04776e+06	302820	1.04776e+06	302820
qe	High	aTATTAAATHTPR	20	32	N-Term(Dimethyl)	1	1	YLL041C	SDH2	0	2	1	649.346	1297.68	-0.88519	HCD	30.8898	250	22.1568	5508	qExPlus02_00983.raw	94.13	34	27	8.5321e+06	0	3.696e-08	8.5321e+06	3.50416e+06	9.57986e+06	3.80698e+06
qe	High	aTATTAAATHTPR	20	32	N-Term(Dimethyl:2H(6))	1	1	YLL041C	SDH2	0	2	1	652.365	1303.72	-0.461517	HCD	0	250	25.7342	6576	qExPlus02_00983.raw	11.31	34	27	2.63531e+06	0.002744	0.09874	9852984	2.63531e+06	1.94328e+07	6.44229e+06
qe	High	aTATTAAATHTPR	20	32	N-Term(Dimethyl:2H(6))	1	1	YLL041C	SDH2	0	2	1	652.367	1303.73	2.90924	HCD	10.8708	250	28.8986	7718	qExPlus02_00983.raw	74.78	34	27	1.62096e+06	0	0.0001627	9102.34	723927	1.94419e+07	7.16622e+06
qe	High	aTATTAAATHTPR	20	32	N-Term(Dimethyl:2H(6))	1	1	YLL041C	SDH2	0	2	1	652.363	1303.72	-3.36411	HCD	23.3588	250	10.0976	2416	qExPlus02_00984.raw	92.86	34	27	1.89994e+08	0	4.597e-05	3.11677e+08	1.89994e+08	3.31119e+08	1.9716e+08
qe	High	aTATTAAATHTPR	20	32	N-Term(Dimethyl:2H(6))	1	1	YLL041C	SDH2	0	2	1	652.363	1303.72	-3.64501	HCD	13.6541	250	10.8723	2616	qExPlus02_00984.raw	71.35	34	27	352848	0	5.632e-05	795517	352848	3.31914e+08	1.97513e+08	3.31914e+08	1.97513e+08	0.595071
qe	High	aTATTAAATHTPR	20	32	N-Term(Dimethyl)	1	1	YLL041C	SDH2	0	3	1	433.232	1297.68	-3.57648	HCD	17.2076	158.132	10.1821	2436	qExPlus02_00984.raw	61.82	35	28	2.35498e+07	0	5.812e-07	23403247	1.49664e+07	23403247	1.49664e+07	23403247	1.49664e+07	0.639499
Fusion	High	nVASEmNTkAAIAEEQILNkQR	51	72	N-Term(Dimethyl); M6(Oxidation); K9(Dimethyl); K20(Dimethyl)	1	1	YKL141W	SDH3	2	3	1	853.461	2558.37	2.54045	HCD	30.5326	40.693	12.0895	6956	Fusion002161.raw	23.84	24	17	1.29404e+07	0	0.1795	6.33369e+06	2.92916e+06	6.33369e+06	2.92916e+06
Fusion	High	nVASEMNTkAAIAEEQILNkQR	51	72	N-Term(Dimethyl:2H(6)); K9(Dimethyl:2H(6)); K20(Dimethyl:2H(6))	1	1	YKL141W	SDH3	2	3	1	854.163	2560.48	-1.21428	HCD	20.8827	40.693	6.54786	3797	Fusion002161.raw	49.5	23	16	1.90672e+07	0	0.003145	2.33171e+07	1.85558e+07	2.96508e+07	2.14849e+07	2.96508e+07	2.14849e+07	0.7246
qe	High	aAIAEEQILNkQR	60	72	N-Term(Dimethyl:2H(6)); K11(Dimethyl:2H(6))	1	1	YKL141W	SDH3	1	2	1	776.484	1551.96	0.45927	HCD	0	209.348	27.0528	6687	qExPlus02_00984.raw	84.59	34	27	7.89212e+06	0	0.0001123	2.74541e+07	7746140	2.74541e+07	7746140
qe	High	aAIAEEQILNkQR	60	72	N-Term(Dimethyl); K11(Dimethyl)	1	1	YKL141W	SDH3	1	2	1	770.447	1539.89	0.545143	HCD		250	27.3342	6758	qExPlus02_00984.raw	46.45	35	28	164816	0	4.895e-06			2.74541e+07	7746140	2.74541e+07	7746140	0.282149
qe	High	aAIAEEQILNkQR	60	72	N-Term(Dimethyl); K11(Dimethyl)	1	1	YKL141W	SDH3	1	3	1	513.967	1539.89	0.100413	HCD	30.0566	250	27.2298	6732	qExPlus02_00984.raw	11.76	35	28	1.52768e+06	0	0.003584	959941	9102.34	959941	9102.34	959941	9102.34	0.00948218
qe	High	lTIPFLPVLPQkPGGVR	32	48	N-Term(Dimethyl); K12(Dimethyl)	1	1	YDR178W	SDH4	0	2	1	944.593	1888.18	-0.0544627	HCD	5.51645	250	68.0911	17653	qExPlus02_00983.raw	63.25	25	18	1.37954e+07	0	5.55e-05	1.37954e+07	6.60954e+06	1.37954e+07	6.60954e+06	1.37954e+07	6.60954e+06	0.479111
qe	High	lTIPFLPVLPQkPGGVR	32	48	N-Term(Dimethyl:2H(6)); K12(Dimethyl:2H(6))	1	1	YDR178W	SDH4	0	3	1	634.089	1900.25	-0.609654	HCD	0	250	67.7699	17577	qExPlus02_00983.raw	62.39	28	21	3.65596e+07	0	4.584e-06	6.554e+07	3.65596e+07	6.554e+07	3.65596e+07
qe	High	lTIPFLPVLPQkPGGVR	32	48	N-Term(Dimethyl:2H(6)); K12(Dimethyl:2H(6))	1	1	YDR178W	SDH4	0	3	1	634.089	1900.25	-1.1878	HCD	37.6559	250	68.3036	17701	qExPlus02_00983.raw	39.92	28	21	666444	0	0.0001442	974177	666444	6.65141e+07	3.72261e+07	6.65141e+07	3.72261e+07	0.559672
qe	Medium	lTIPFLPVLPQkPGGVR	32	48	N-Term(Dimethyl); K12(Dimethyl)	1	1	YDR178W	SDH4	0	4	1	472.8	1888.18	-0.779853	HCD	0	250	67.9393	17617	qExPlus02_00983.raw	32.15	25	18	5.26511e+06	0.01934	0.2712	5.01712e+06	1.72155e+06	5.01712e+06	1.72155e+06	5.01712e+06	1.72155e+06	0.343134
qe	High	lLTSGAQSLVSkPVSEGDPEmFDILQQER	20	48	N-Term(Dimethyl); K12(Dimethyl); M21(Oxidation)	1	1	YBR263W	SHM1	0	3	1	1082.89	3246.65	-0.454494	HCD	0	250	58.0844	15211	qExPlus02_00983.raw	35.94	35	28	5.50394e+07	0	1.974e-07	5.50394e+07	2.56939e+07	5.50394e+07	2.56939e+07
qe	High	lLTSGAQSLVSkPVSEGDPEmFDILQQER	20	48	N-Term(Dimethyl); K12(Dimethyl); M21(Oxidation)	1	1	YBR263W	SHM1	0	3	1	1082.89	3246.65	-2.14644	HCD	36.3373	180.19	64.0305	16671	qExPlus02_00983.raw	25.83	35	28	1.8541e+06	0	9.78e-06			5.50394e+07	2.56939e+07
qe	High	lLTSGAQSLVSkPVSEGDPEMFDILQQER	20	48	N-Term(Dimethyl); K12(Dimethyl)	1	1	YBR263W	SHM1	0	3	1	1077.56	3230.66	-1.95516	HCD	3.11391	250	64.2318	16728	qExPlus02_00983.raw	68.44	35	28	2.30931e+08	0	1.94e-12	36268700	9102.34	9.13081e+07	2.5703e+07	9.13081e+07	2.5703e+07	0.281497
qe	High	lLTSGAQSLVSkPVSEGDPEmFDILQQER	20	48	N-Term(Dimethyl:2H(6)); K12(Dimethyl:2H(6)); M21(Oxidation)	1	1	YBR263W	SHM1	0	4	1	815.433	3258.71	-6.88265	HCD	54.3395	250	58.0555	15204	qExPlus02_00983.raw	31.84	34	27	2.12618e+06	0	0.03146	2.38181e+06	1.52977e+06	2.38181e+06	1.52977e+06
qe	High	lLTSGAQSLVSkPVSEGDPEmFDILQQER	20	48	N-Term(Dimethyl); K12(Dimethyl); M21(Oxidation)	1	1	YBR263W	SHM1	0	4	1	812.419	3246.65	-0.928621	HCD	1.34505	250	58.2094	15241	qExPlus02_00983.raw	47.41	35	28	1.43878e+07	0	2.692e-06	1.18725e+07	4.48003e+06	1.42543e+07	6.00981e+06
qe	High	lLTSGAQSLVSkPVSEGDPEMFDILQQER	20	48	N-Term(Dimethyl); K12(Dimethyl)	1	1	YBR263W	SHM1	0	4	1	808.421	3230.66	0.213316	HCD	31.6009	178.052	63.9811	16653	qExPlus02_00983.raw	50.52	35	28	4.97795e+07	0	3.617e-09	8632036		2.28863e+07	6.00981e+06	2.28863e+07	6.00981e+06	0.262594
qe	High	skVESFADALSR	76	87	N-Term(Dimethyl); K2(Dimethyl)	1	1	YDR011W	SNQ2	1	2	1	683.371	1365.73	-1.80605	HCD	15.4905	63.032	31.5475	7885	qExPlus02_00984.raw	54.4	36	29	6.97696e+07	0	2.987e-06	6.97696e+07	4.6893e+07	6.97696e+07	4.6893e+07	6.97696e+07	4.6893e+07	0.672112
Fusion	High	vQAVAVLkGDAGVSGVVkFEQASESEPTTVSYEIAGNSPNAER	2	44	N-Term(Dimethyl); K8(Dimethyl); K18(Dimethyl)	1	1	YJR104C	SOD1	2	5	1	895.867	4475.31	3.1339	ETD	0.961197	50	23.2119	13102	Fusion002161.raw	26.34	20	13	1.71006e+07	0	0.1304	1.71006e+07	4.31594e+07	1.71006e+07	4.31594e+07	1.71006e+07	4.31594e+07	2.52385
qe_Acetyl	High	mFAkTAAANLTk	1	12	N-Term(Acetyl); K4(Dimethyl:2H(6)); K12(Dimethyl:2H(6))	1	1	YHR008C	SOD2	1	2	1	688.923	1376.84	2.14913	HCD	0	250	45.4049	12092	qExPlus02_00983.raw	47.83	33	26	2.29552e+06	0	0.0002104	19568.4	1.27422e+06	19568.4	1.27422e+06	19568.4	1.27422e+06	65.1165
qe	High	tAAANLTkkGGLSLLSTTAR	5	24	N-Term(Dimethyl:2H(6)); K8(Dimethyl:2H(6)); K9(Dimethyl:2H(6))	1	1	YHR008C	SOD2	2	3	1	692.784	2076.34	-2.46845	HCD	67.398	96.2045	33.1998	8349	qExPlus02_00984.raw	49.53	29	22	10449131	0	7.023e-07	9102.34	5.82582e+06	9102.34	5.82582e+06	9102.34	5.82582e+06	640.036
qe	High	aANLTkkGGLSLLSTTAR	7	24	N-Term(Dimethyl:2H(6)); K6(Dimethyl:2H(6)); K7(Dimethyl:2H(6))	1	1	YHR008C	SOD2	2	3	1	635.422	1904.25	-1.78654	HCD	77.4994	77.9024	29.9299	7443	qExPlus02_00984.raw	14.6	28	21	1.33296e+07	0	0.008612	9102.34	6.18216e+06	9102.34	6.18216e+06	9102.34	6.18216e+06	679.184
qe	High	gLSLLSTTAR	15	24	N-Term(Dimethyl:2H(6))	1	1	YHR008C	SOD2	0	2	1	526.832	1052.66	-0.896701	HCD	15.2838	250	39.0436	10570	qExPlus02_00983.raw	44.56	33	26	2.32595e+06	0	0.01251		1.62308e+06	0	1.62308e+06	0	1.62308e+06
qe	High	lSLLSTTAR	16	24	N-Term(Dimethyl:2H(6))	1	1	YHR008C	SOD2	0	1	1	995.635	995.635	-1.50705	HCD	0	250	37.5829	10225	qExPlus02_00983.raw	41.86	33	26	5.65599e+06	0	0.004231	1.29795e+06	5.65599e+06	1.29795e+06	5.65599e+06	1.29795e+06	5.65599e+06	4.35763
qe	High	lSLLSTTAR	16	24	N-Term(Dimethyl)	1	1	YHR008C	SOD2	0	2	1	495.302	989.597	-1.89756	HCD	5.53674	250	37.6113	10231	qExPlus02_00983.raw	40.77	36	29	9.05582e+06	0.005141	0.04812	9.05582e+06	3.31261e+07	9.05582e+06	3.31261e+07	9.05582e+06	3.31261e+07	3.65799
qe	High	sLLSTTAR	17	24	N-Term(Dimethyl:2H(6))	1	1	YHR008C	SOD2	0	1	1	882.551	882.551	-1.61001	HCD	0	189.488	21.341	5293	qExPlus02_00983.raw	42.34	34	27	1.36021e+07	0.001946	0.07939	1.16723e+06	13006701	1.16723e+06	13006701	1.16723e+06	13006701	11.1433
qe	High	sLLSTTAR	17	24	N-Term(Dimethyl:2H(6))	1	1	YHR008C	SOD2	0	2	1	441.78	882.553	0.656952	HCD	3.12268	199.732	21.5591	5349	qExPlus02_00983.raw	38.09	33	26	1.19035e+08	0	0.06727	1.32374e+07	107563052	1.32374e+07	107563052	1.32374e+07	107563052	8.12571
qe	High	dLLAkEPSPANAR	76	88	N-Term(Dimethyl); K5(Dimethyl)	1	1	YHR008C	SOD2	1	2	1	719.406	1437.8	-1.30678	HCD	20.0956	250	38.1692	9092	qExPlus02_00989.raw	52	35	28	2.16037e+07	0	0.0003019	2.12657e+07	1.46371e+07	2.12657e+07	1.46371e+07	2.12657e+07	1.46371e+07	0.688296
qe	High	lLAkEPSPANAR	77	88	N-Term(Dimethyl:2H(6)); K4(Dimethyl:2H(6))	1	1	YHR008C	SOD2	1	2	1	667.93	1334.85	-0.796796	HCD	7.53158	250	17.388	4242	qExPlus02_00984.raw	29.77	33	26	1.42118e+06	0	0.01029	990259	1.42118e+06	990259	1.42118e+06
qe	High	lLAkEPSPANAR	77	88	N-Term(Dimethyl); K4(Dimethyl)	1	1	YHR008C	SOD2	1	2	1	661.892	1322.78	-1.44656	HCD	0	250	17.5259	4275	qExPlus02_00984.raw	23.21	34	27	322255	0.006573	0.08723			990259	1.42118e+06	990259	1.42118e+06	1.43516
qe	High	mkLDSGIYSEAQR	1	13	N-Term(Dimethyl:2H(6)); M1(Oxidation); K2(Dimethyl:2H(6))	1	1	YGR236C	SPG1	1	2	1	791.438	1581.87	-0.468255	HCD	10.1268	223.483	22.5025	5508	qExPlus02_00984.raw	58.26	35	28	9.67224e+07	0	0.0001192	7.51677e+06	9.65303e+07	7.51677e+06	9.65303e+07
qe	High	mkLDSGIYSEAQR	1	13	N-Term(Dimethyl); M1(Oxidation); K2(Dimethyl)	1	1	YGR236C	SPG1	1	2	1	785.398	1569.79	-3.57939	HCD	22.9104	250	22.8078	5580	qExPlus02_00984.raw	65.13	35	28	4.17493e+06	0	5.095e-05	4.17493e+06	41450790	1.16917e+07	1.37981e+08
qe	High	mkLDSGIYSEAQR	1	13	N-Term(Dimethyl:2H(6)); M1(Oxidation); K2(Dimethyl:2H(6))	1	1	YGR236C	SPG1	1	2	1	791.44	1581.87	1.76963	HCD	0	250	23.0362	5637	qExPlus02_00984.raw	44.98	35	28	111290	0	0.000559	31708	70946.9	1.17234e+07	1.38052e+08
qe	High	mkLDSGIYSEAQR	1	13	N-Term(Dimethyl:2H(6)); M1(Oxidation); K2(Dimethyl:2H(6))	1	1	YGR236C	SPG1	1	2	1	791.436	1581.87	-2.62897	HCD	0	250	24.5591	6038	qExPlus02_00984.raw	47.79	35	28	9.93265e+06	0	0.006506	9102.34	4.20522e+06	1.17325e+07	1.42257e+08
qe	High	mkLDSGIYSEAQR	1	13	N-Term(Dimethyl:2H(6)); M1(Oxidation); K2(Dimethyl:2H(6))	1	1	YGR236C	SPG1	1	2	1	791.435	1581.86	-4.32667	HCD	0	250	27.5625	6819	qExPlus02_00984.raw	36.94	35	28	677697	0	0.003343			1.17325e+07	1.42257e+08
qe	High	mkLDSGIYSEAQR	1	13	N-Term(Dimethyl:2H(6)); M1(Oxidation); K2(Dimethyl:2H(6))	1	1	YGR236C	SPG1	1	2	1	791.437	1581.87	-1.85729	HCD	0	250	27.8392	6897	qExPlus02_00984.raw	54.22	35	28	5.56983e+06	0	0.0004248	9102.34	3.16431e+06	1.17416e+07	1.45422e+08
qe	High	mkLDSGIYSEAQR	1	13	N-Term(Dimethyl:2H(6)); M1(Oxidation); K2(Dimethyl:2H(6))	1	1	YGR236C	SPG1	1	2	1	791.437	1581.87	-2.24313	HCD	27.0345	250	28.9995	7194	qExPlus02_00984.raw	39.64	35	28	1.27813e+06	0	0.0195	9102.34	610571	1.17507e+07	1.46032e+08
qe	High	mkLDSGIYSEAQR	1	13	N-Term(Dimethyl); K2(Dimethyl)	1	1	YGR236C	SPG1	1	2	1	777.402	1553.8	-1.86087	HCD	0	88.6253	29.8874	7431	qExPlus02_00984.raw	78.46	35	28	6.0158e+07	0	2.618e-07	6.0158e+07	609066242	7.19087e+07	7.55098e+08
qe	High	mkLDSGIYSEAQR	1	13	N-Term(Dimethyl:2H(6)); M1(Oxidation); K2(Dimethyl:2H(6))	1	1	YGR236C	SPG1	1	2	1	791.439	1581.87	1.22945	HCD	9.36076	187.631	30.0626	7479	qExPlus02_00984.raw	56.53	35	28	164761385	0	0.0003749	4.41715e+07	1.63762e+08	1.1608e+08	9.18861e+08
qe	High	mkLDSGIYSEAQR	1	13	N-Term(Dimethyl:2H(6)); K2(Dimethyl:2H(6))	1	1	YGR236C	SPG1	1	2	1	783.439	1565.87	-2.16129	HCD	7.95565	215.561	30.286	7531	qExPlus02_00984.raw	58.21	35	28	15197273	0	1.623e-06	2.87628e+06	1.12406e+07	1.18956e+08	9.30101e+08
qe	High	mkLDSGIYSEAQR	1	13	N-Term(Dimethyl:2H(6)); K2(Dimethyl:2H(6))	1	1	YGR236C	SPG1	1	2	1	783.44	1565.87	-1.22581	HCD	0	250	31.2459	7800	qExPlus02_00984.raw	43.12	35	28	6.84265e+06	0	0.001857	9102.34	3230444	1.18966e+08	9.33332e+08	1.18966e+08	9.33332e+08	7.84539
qe	High	mkLDSGIYSEAQR	1	13	N-Term(Dimethyl:2H(6)); M1(Oxidation); K2(Dimethyl:2H(6))	1	1	YGR236C	SPG1	1	3	1	527.961	1581.87	-0.0523287	HCD	6.11032	250	22.7135	5557	qExPlus02_00984.raw	26.43	35	28	7.38708e+06	0	0.01144	9102.34	3503408	9102.34	3503408
qe	Medium	mkLDSGIYSEAQR	1	13	N-Term(Dimethyl); M1(Oxidation); K2(Dimethyl)	1	1	YGR236C	SPG1	1	3	1	523.935	1569.79	-1.52727	HCD	0	250	22.8668	5594	qExPlus02_00984.raw	34.52	35	28	746740	0.01252	0.1875			9102.34	3503408
qe	Medium	mkLDSGIYSEAQR	1	13	N-Term(Dimethyl:2H(6)); K2(Dimethyl:2H(6))	1	1	YGR236C	SPG1	1	3	1	522.63	1565.88	1.41613	HCD	0	250	30.1	7488	qExPlus02_00984.raw	21.95	35	28	8.24508e+07	0.02674	0.297	5.27093e+06	76117116	5.28004e+06	79620524
qe	High	mkLDSGIYSEAQR	1	13	N-Term(Dimethyl:2H(6)); M1(Oxidation); K2(Dimethyl:2H(6))	1	1	YGR236C	SPG1	1	3	1	527.961	1581.87	-0.399586	HCD	12.8155	92.7528	29.9458	7450	qExPlus02_00984.raw	38.03	35	28	1.26538e+07	0	0.02028	3.32542e+06	1.26538e+07	8.60545e+06	9.22743e+07	8.60545e+06	9.22743e+07	10.7228
Fusion_Acetyl	High	gYTVPAHSLDNINGVDTTkASVMGTEQR	41	68	N-Term(Acetyl); K19(Dimethyl:2H(6))	1	1	YGR236C	SPG1	1	4	1	760.135	3037.52	0.0477261	ETD	2.57559	50	5.04572	2925	Fusion002161.raw	25.42	35	28	1.19341e+07	0	0.1071		2798139	0	2798139	0	2798139
qe_Acetyl	High	mLAAkNILNR	1	10	N-Term(Acetyl); M1(Oxidation); K5(Dimethyl:2H(6))	1	1	YJR045C	SSC1	1	2	1	618.372	1235.74	-2.74843	HCD	40.4706	250	40.3442	10887	qExPlus02_00983.raw	23.16	34	27	8143792	0	0.001066	19568.4	5449519	19568.4	5449519
qe_Acetyl	High	mLAAkNILNR	1	10	N-Term(Acetyl); M1(Oxidation); K5(Dimethyl:2H(6))	1	1	YJR045C	SSC1	1	2	1	618.373	1235.74	-2.35329	HCD	2.48362	103.076	41.8783	11250	qExPlus02_00983.raw	44.45	34	27	2.77789e+07	0	0.0008298			19568.4	5449519
qe_Acetyl	High	mLAAkNILNR	1	10	N-Term(Acetyl); M1(Oxidation); K5(Dimethyl:2H(6))	1	1	YJR045C	SSC1	1	2	1	618.372	1235.74	-3.04478	HCD	4.28451	2.18407	39.3466	10647	qExPlus02_00983.raw	49.72	34	27	2.09905e+09	0	0.001294	19568.4	1086861440	39136.7	1092310959
qe_Acetyl	High	mLAAkNILNR	1	10	N-Term(Acetyl); M1(Oxidation); K5(Dimethyl:2H(6))	1	1	YJR045C	SSC1	1	2	1	618.374	1235.74	-0.871547	HCD	14.2336	250	43.8484	11714	qExPlus02_00983.raw	35.49	34	27	3.15118e+06	0	0.007067	19568.4	1.51294e+06	58705.1	1.09382e+09
qe_Acetyl	High	mLAAkNILNR	1	10	N-Term(Acetyl); M1(Oxidation); K5(Dimethyl:2H(6))	1	1	YJR045C	SSC1	1	2	1	618.374	1235.74	-0.772764	HCD	3.08987	250	46.8518	12441	qExPlus02_00983.raw	44.32	34	27	3.64683e+06	0	0.01192	19568.4	1.87012e+06	78273.4	1.09569e+09
qe_Acetyl	High	mLAAkNILNR	1	10	N-Term(Acetyl); M1(Oxidation); K5(Dimethyl:2H(6))	1	1	YJR045C	SSC1	1	2	1	618.374	1235.74	0.31385	HCD	27.663	250	46.5594	12372	qExPlus02_00983.raw	46.19	34	27	3220990	0	0.001239	19568.4	2.23897e+06	97841.8	1.09793e+09
qe_Acetyl	High	mLAAkNILNR	1	10	N-Term(Acetyl); M1(Oxidation); K5(Dimethyl:2H(6))	1	1	YJR045C	SSC1	1	2	1	618.374	1235.74	-0.180066	HCD	7.68055	250	49.0411	12991	qExPlus02_00983.raw	42.66	33	26	3.29401e+06	0	0.004501			97841.8	1.09793e+09
qe_Acetyl	High	mLAAkNILNR	1	10	N-Term(Acetyl); M1(Oxidation); K5(Dimethyl:2H(6))	1	1	YJR045C	SSC1	1	2	1	618.373	1235.74	-1.46425	HCD	0	250	48.3738	12823	qExPlus02_00983.raw	42.9	33	26	4.40728e+06	0	0.002944	19568.4	2.88209e+06	117410	1.10082e+09
qe_Acetyl	High	mLAAkNILNR	1	10	N-Term(Acetyl); M1(Oxidation); K5(Dimethyl:2H(6))	1	1	YJR045C	SSC1	1	2	1	618.372	1235.74	-3.93382	HCD	37.8596	250	44.9598	11982	qExPlus02_00983.raw	24.01	33	26	1.42436e+06	0.001447	0.06188	19568.4	921053	136979	1.10174e+09
qe_Acetyl	High	mLAAkNILNR	1	10	N-Term(Acetyl); M1(Oxidation); K5(Dimethyl:2H(6))	1	1	YJR045C	SSC1	1	2	1	618.374	1235.74	-0.0812827	HCD	30.2594	250	44.6853	11916	qExPlus02_00983.raw	11.7	33	26	5.0798e+06	0.001447	0.06089	19568.4	3.57015e+06	156547	1.10531e+09
qe_Acetyl	High	mLAAkNILNR	1	10	N-Term(Acetyl); M1(Oxidation); K5(Dimethyl:2H(6))	1	1	YJR045C	SSC1	1	2	1	618.374	1235.74	-1.06911	HCD	12.6673	250	44.4026	11847	qExPlus02_00983.raw	31.47	33	26	3.44525e+06	0	0.01158	19568.4	1.74646e+06	176115	1.10705e+09
qe_Acetyl	High	mLAAkNILNR	1	10	N-Term(Acetyl); M1(Oxidation); K5(Dimethyl:2H(6))	1	1	YJR045C	SSC1	1	2	1	618.374	1235.74	-0.97033	HCD	45.1747	250	44.1231	11781	qExPlus02_00983.raw	25.27	33	26	2.15972e+06	0	0.01386	19568.4	1.18713e+06	195684	1.10824e+09
qe_Acetyl	High	mLAAkNILNR	1	10	N-Term(Acetyl); M1(Oxidation); K5(Dimethyl:2H(6))	1	1	YJR045C	SSC1	1	2	1	618.374	1235.74	-0.180066	HCD	37.8677	250	46.2532	12296	qExPlus02_00983.raw	34.66	33	26	542341	0	0.005324			195684	1.10824e+09
qe_Acetyl	High	mLAAkNILNR	1	10	N-Term(Acetyl); M1(Oxidation); K5(Dimethyl:2H(6))	1	1	YJR045C	SSC1	1	2	1	618.373	1235.74	-1.36546	HCD	55.655	190.91	45.9751	12230	qExPlus02_00983.raw	27.59	34	27	1.96581e+06	0.001447	0.02655	19568.4	1.46924e+06	215252	1.10971e+09
qe_Acetyl	High	mLAAkNILNR	1	10	N-Term(Acetyl); M1(Oxidation); K5(Dimethyl:2H(6))	1	1	YJR045C	SSC1	1	2	1	618.373	1235.74	-1.85938	HCD	5.28797	10.7117	50.3574	13315	qExPlus02_00983.raw	48.18	34	27	857237553	0	0.008762	19568.4	435154560	234820	1.54486e+09
qe_Acetyl	High	mLAAkNILNR	1	10	N-Term(Acetyl); K5(Dimethyl:2H(6))	1	1	YJR045C	SSC1	1	2	1	610.376	1219.74	-1.04874	HCD	5.17194	2.06229	50.3323	13309	qExPlus02_00983.raw	50.98	34	27	2.93654e+09	0	0.0001919	19568.4	1453449728	254389	2.99831e+09
qe_Acetyl	High	mLAAkNILNR	1	10	N-Term(Acetyl); M1(Oxidation); K5(Dimethyl:2H(6))	1	1	YJR045C	SSC1	1	2	1	618.375	1235.74	0.511416	HCD	0	250	49.7883	13168	qExPlus02_00983.raw	41.62	34	27	4601452	0	0.01323			254389	2.99831e+09
qe_Acetyl	High	mLAAkNILNR	1	10	N-Term(Acetyl); M1(Oxidation); K5(Dimethyl:2H(6))	1	1	YJR045C	SSC1	1	2	1	618.373	1235.74	-1.85938	HCD	57.3099	250	51.2302	13520	qExPlus02_00983.raw	35.71	34	27	1.79366e+06	0.001447	0.04577	19568.4	1.10306e+06	273957	2.99942e+09
qe_Acetyl	High	mLAAkNILNR	1	10	N-Term(Acetyl); M1(Oxidation); K5(Dimethyl:2H(6))	1	1	YJR045C	SSC1	1	2	1	618.374	1235.74	-0.476415	HCD	0	250	50.921	13448	qExPlus02_00983.raw	40.58	34	27	648157	0	0.003455			273957	2.99942e+09
qe_Acetyl	Medium	mLAAkNILNR	1	10	N-Term(Acetyl); M1(Oxidation); K5(Dimethyl:2H(6))	1	1	YJR045C	SSC1	1	2	1	618.372	1235.74	-3.34112	HCD	10.0557	250	45.4002	12091	qExPlus02_00983.raw	24.65	34	27	3.17747e+06	0.01213	0.1154	19568.4	2.01907e+06	293525	3001435535	293525	3001435535	10225.5
Fusion_Acetyl	High	mLAAkNILNRSSLSSSFR	1	18	N-Term(Acetyl); K5(Dimethyl:2H(6))	1	1	YJR045C	SSC1	2	3	1	691.059	2071.16	0.626533	HCD	10.3355	40.693	22.4684	12697	Fusion002161.raw	31.64	34	27	4.36581e+07	0	0.03655	604328	29143963	604328	29143963
Fusion_Acetyl	High	mLAAkNILNRSSLSSSFR	1	18	N-Term(Acetyl); M1(Oxidation); K5(Dimethyl:2H(6))	1	1	YJR045C	SSC1	2	3	1	696.39	2087.16	0.396928	ETD	51.5073	50	12.2148	7028	Fusion002161.raw	30.87	34	27	3.2498e+07	0	0.001809	2297.14	10499054	606625	39643017	606625	39643017	65.3501
qe	High	aAkNILNR	3	10	N-Term(Dimethyl:2H(6)); K3(Dimethyl:2H(6))	1	1	YJR045C	SSC1	1	2	1	484.343	967.678	-2.34103	HCD	10.8287	250	12.2282	2952	qExPlus02_00984.raw	26.21	33	26	2234137	0	0.009074	9102.34	1.22855e+06	9102.34	1.22855e+06	9102.34	1.22855e+06	134.971
qe_Acetyl	High	aAkNILNR	3	10	N-Term(Acetyl); K3(Dimethyl:2H(6))	1	1	YJR045C	SSC1	1	2	1	488.314	975.62	-1.39858	HCD	0	133.706	25.1225	6380	qExPlus02_00983.raw	21.78	32	25	94436510	0.001447	0.02699	19568.4	59396572	19568.4	59396572	19568.4	59396572	3035.34
qe_Acetyl	High	sSLSSSFR	11	18	N-Term(Acetyl)	1	1	YJR045C	SSC1	0	2	1	456.724	912.44	-2.08634	HCD	16.0952	28.78	38.8231	9996	qExPlus02_00982.raw	27.74	32	25	6.19691e+07	0.005022	0.09063			0	0	0	0
qe	High	tTPSVVAFTkEGER	63	76	N-Term(Dimethyl:2H(6)); K10(Dimethyl:2H(6))	1	1	YJR045C	SSC1	1	2	1	795.47	1589.93	3.0502	HCD	21.5119	138.389	31.506	7874	qExPlus02_00984.raw	57.51	36	29	2.64758e+07	0	0.0005646	1.30872e+07	2.61981e+07	1.30872e+07	2.61981e+07	1.30872e+07	2.61981e+07	2.00182
qe_Acetyl	High	tTPSVVAFTkEGER	63	76	N-Term(Acetyl); K10(Dimethyl)	1	1	YJR045C	SSC1	1	2	1	796.42	1591.83	-0.488727	HCD	10.7968	155.95	44.7163	11924	qExPlus02_00983.raw	66.85	36	29	41697773	0	0.01066	41697773	76853732	41697773	76853732	41697773	76853732	1.84311
qe	High	tPSVVAFTkEGER	64	76	N-Term(Dimethyl:2H(6)); K9(Dimethyl:2H(6))	1	1	YJR045C	SSC1	1	2	1	744.942	1488.88	-3.09017	HCD	15.2704	250	27.4502	6785	qExPlus02_00984.raw	29.71	35	28	1.72686e+07	0	0.004352	7074063	16973745	7074063	16973745	7074063	16973745	2.39943
qe_Acetyl	Medium	lVGIPAkR	77	84	N-Term(Acetyl); K7(Dimethyl:2H(6))	1	1	YJR045C	SSC1	1	2	1	465.323	929.639	-2.53924	HCD	41.4214	250	40.0689	10816	qExPlus02_00983.raw	19.81	30	23	1.35641e+06	0.02999	0.1977		837235	0	837235	0	837235
qe	High	qAVVNPENTLFATkR	85	99	N-Term(Dimethyl); K14(Dimethyl)	1	1	YJR045C	SSC1	1	3	1	581.997	1743.98	0.629239	HCD	22.467	250	36.9483	9403	qExPlus02_00984.raw	20.55	36	29	1.6418e+06	0	0.0004638	971901	9102.34	971901	9102.34	971901	9102.34	0.0093655
Fusion	High	qAVVNPENTLFATkR	85	99	N-Term(Dimethyl:2H(6)); K14(Dimethyl:2H(6))	1	1	YJR045C	SSC1	1	3	1	586.022	1756.05	0.691797	HCD	46.781	37.2279	1.39496	796	Fusion002161.raw	15.41	24	17	4.28962e+06	0	0.1514	2.3672e+07	4.28962e+06	2.3672e+07	4.28962e+06	2.3672e+07	4.28962e+06	0.181211
qe_Acetyl	Medium	mLkSGR	1	6	N-Term(Acetyl); K3(Dimethyl:2H(6))	1	1	YLR369W	SSQ1	1	2	1	384.239	767.471	-0.15725	HCD	0	250	16.2028	3978	qExPlus02_00983.raw	20.28	33	26	3.75873e+06	0.02487	0.1667	19568.4	2.80828e+06	19568.4	2.80828e+06	19568.4	2.80828e+06	143.511
qe	High	sTNPQLTkkVIGIDLGTTNSAVAYIR	21	46	N-Term(Dimethyl); K8(Dimethyl); K9(Dimethyl)	1	1	YLR369W	SSQ1	2	3	1	948.879	2844.62	1.0653	HCD	5.12309	250	49.6626	12532	qExPlus02_00984.raw	66.46	30	23	2.46622e+06	0	1.197e-07	1.99478e+06	9102.34	1.99478e+06	9102.34
qe	High	sTNPQLTkkVIGIDLGTTNSAVAYIR	21	46	N-Term(Dimethyl); K8(Dimethyl); K9(Dimethyl)	1	1	YLR369W	SSQ1	2	3	1	948.879	2844.62	1.38715	HCD	0	250	49.919	12595	qExPlus02_00984.raw	49.37	30	23	1.80572e+06	0	2.7e-06	431241	9102.34	2.42602e+06	18204.7	2.42602e+06	18204.7	0.00750391
qe	High	sDGPLGGAGPGNPQDIFIkR	24	43	N-Term(Dimethyl:2H(6)); K19(Dimethyl:2H(6))	1	1	YDL130W-A	STF1	1	2	1	1032.58	2064.16	-3.63764	HCD	0	250	39.3398	9423	qExPlus02_00989.raw	120.31	36	29	5.1648e+07	0	1.471e-08	7.69772e+07	5.1648e+07	7.69772e+07	5.1648e+07
qe	High	sDGPLGGAGPGNPQDIFIkR	24	43	N-Term(Dimethyl:2H(6)); K19(Dimethyl:2H(6))	1	1	YDL130W-A	STF1	1	2	1	1032.58	2064.16	-1.62695	HCD	0	39.7443	39.6031	9499	qExPlus02_00989.raw	121.27	36	29	97249088	0	9.227e-12			7.69772e+07	5.1648e+07
qe	High	sDGPLGGAGPGNPQDIFIkR	24	43	N-Term(Dimethyl:2H(6)); K19(Dimethyl:2H(6))	1	1	YDL130W-A	STF1	1	2	1	1032.58	2064.16	-0.325918	HCD	0	151.844	39.8712	9582	qExPlus02_00989.raw	121.08	36	29	1.41769e+07	0	8.087e-10	37483289	1.41769e+07	1.1446e+08	65824924
qe	High	sDGPLGGAGPGNPQDIFIkR	24	43	N-Term(Dimethyl:2H(6)); K19(Dimethyl:2H(6))	1	1	YDL130W-A	STF1	1	2	1	1032.58	2064.16	-0.799021	HCD		250	40.1884	9667	qExPlus02_00989.raw	126.95	36	29	758061	0	3.392e-09		488325	1.1446e+08	6.63132e+07	1.1446e+08	6.63132e+07	0.579355
qe	High	sDGPLGGAGPGNPQDIFIkR	24	43	N-Term(Dimethyl:2H(6)); K19(Dimethyl:2H(6))	1	1	YDL130W-A	STF1	1	3	1	688.723	2064.15	-4.2651	HCD	25.2536	250	47.4316	11983	qExPlus02_00984.raw	47.89	36	29	8.80214e+06	0	9.562e-07	1.52706e+07	8.80214e+06	1.52706e+07	8.80214e+06
qe	High	sDGPLGGAGPGNPQDIFIkR	24	43	N-Term(Dimethyl:2H(6)); K19(Dimethyl:2H(6))	1	1	YDL130W-A	STF1	1	3	1	688.725	2064.16	-0.982949	HCD	24.8893	28.473	39.3036	9413	qExPlus02_00989.raw	80.58	36	29	535725281	0	3.104e-08	714790216	535725281	7.30061e+08	5.44527e+08
qe	High	sDGPLGGAGPGNPQDIFIkR	24	43	N-Term(Dimethyl); K19(Dimethyl)	1	1	YDL130W-A	STF1	1	3	1	684.7	2052.08	-1.40288	HCD	1.00208	1.53775	39.6019	9498	qExPlus02_00989.raw	85.54	36	29	1165220365	0	1.797e-10	1164015072	815677805	1.89408e+09	1.36021e+09
qe	High	sDGPLGGAGPGNPQDIFIkR	24	43	N-Term(Dimethyl); K19(Dimethyl)	1	1	YDL130W-A	STF1	1	3	1	684.7	2052.08	-1.49211	HCD	6.67488	3.9364	39.855	9577	qExPlus02_00989.raw	88.52	36	29	135321296	0	4.519e-11		88643240	1.89408e+09	1.44885e+09
qe	High	sDGPLGGAGPGNPQDIFIkR	24	43	N-Term(Dimethyl); K19(Dimethyl)	1	1	YDL130W-A	STF1	1	3	1	684.7	2052.09	-0.421367	HCD	25.0337	100.654	40.3833	9726	qExPlus02_00989.raw	85.56	36	29	11944319	0	3.457e-07	11944319	9650776	1.90602e+09	1.4585e+09
qe	High	sDGPLGGAGPGNPQDIFIkR	24	43	N-Term(Dimethyl); K19(Dimethyl)	1	1	YDL130W-A	STF1	1	3	1	684.699	2052.08	-2.3844	HCD	49.8603	40.7156	40.6406	9807	qExPlus02_00989.raw	38.03	36	29	8.13663e+06	0	2.513e-05	7.32599e+06	6.03685e+06	1.91335e+09	1.46454e+09
qe	High	sDGPLGGAGPGNPQDIFIkR	24	43	N-Term(Dimethyl); K19(Dimethyl)	1	1	YDL130W-A	STF1	1	3	1	684.699	2052.08	-2.56286	HCD	14.5075	234.735	40.9389	9897	qExPlus02_00989.raw	50.02	36	29	1.38111e+07	0	5.794e-05	1.35452e+07	4.60895e+06	1.92689e+09	1.46915e+09
qe	High	sDGPLGGAGPGNPQDIFIkR	24	43	N-Term(Dimethyl:2H(6)); K19(Dimethyl:2H(6))	1	1	YDL130W-A	STF1	1	3	1	688.725	2064.16	-1.33778	HCD	7.93529	250	41.1745	9960	qExPlus02_00989.raw	46.75	36	29	1.52205e+06	0	6.067e-06	9102.34	832950	1.9269e+09	1.46998e+09
qe	High	sDGPLGGAGPGNPQDIFIkR	24	43	N-Term(Dimethyl:2H(6)); K19(Dimethyl:2H(6))	1	1	YDL130W-A	STF1	1	3	1	688.726	2064.16	0.258948	HCD	0	250	41.4555	10033	qExPlus02_00989.raw	54.14	36	29	1.04305e+06	0	3.023e-09	2.85504e+06	1.04305e+06	1.92976e+09	1.47102e+09
qe	High	sDGPLGGAGPGNPQDIFIkR	24	43	N-Term(Dimethyl:2H(6)); K19(Dimethyl:2H(6))	1	1	YDL130W-A	STF1	1	3	1	688.726	2064.16	0.0815337	HCD	0	250	42.7151	10362	qExPlus02_00989.raw	45.17	36	29	3.61276e+06	0	3.081e-07	3.26967e+06	3.61276e+06	1.93303e+09	1.47463e+09	1.93303e+09	1.47463e+09	0.762863
qe	High	aGPGNPQDIFIkR	31	43	N-Term(Dimethyl:2H(6)); K12(Dimethyl:2H(6))	1	1	YDL130W-A	STF1	1	3	1	494.305	1480.9	-1.08345	HCD	24.5692	130.876	33.7032	8526	qExPlus02_00984.raw	45.55	34	27	8.54843e+06	0	7.4e-05	7.46503e+06	7.16543e+06	7.46503e+06	7.16543e+06	7.46503e+06	7.16543e+06	0.959867
Fusion	High	gSDLDLLEkGIR	63	74	N-Term(Dimethyl); K9(Dimethyl)	1	1	YGR046W	TAM41	1	3	1	457.933	1371.78	-0.728118	HCD	23.067	31.453	8.08016	4678	Fusion002161.raw	28.09	24	17	3.47511e+06	0	0.06191	3.3704e+06	1.74754e+06	3.3704e+06	1.74754e+06	3.3704e+06	1.74754e+06	0.518496
qe_Acetyl	High	sFRDVLER	2	9	N-Term(Acetyl)	1	1	YPR140W	TAZ1	1	2	1	532.279	1063.55	-2.92401	HCD	0	250	41.9955	11277	qExPlus02_00983.raw	34.76	35	28	2.21307e+06	0.001447	0.05091			0	0	0	0
Fusion	High	mIRIAINGFGR	1	11	N-Term(Dimethyl:2H(6))	1	1	YJL052W	TDH1	1	3	1	427.93	1281.77	0.827041	HCD	31.4982	33.3293	9.44644	5463	Fusion002161.raw	14.57	21	14	5.5701e+06	0	0.1186	4.03966e+06	5.5701e+06	4.03966e+06	5.5701e+06	4.03966e+06	5.5701e+06	1.37885
Fusion	High	iRIAINGFGR	2	11	N-Term(Dimethyl:2H(6))	1	1	YJL052W	TDH1	1	3	1	384.249	1150.73	0.486248	HCD	3.68014	28.138	3.77821	2191	Fusion002161.raw	54.33	21	14	4.7968e+07	0	0.01294	9.6339e+06	4.77625e+07	9.6339e+06	4.77625e+07
Fusion	High	iRIAINGFGR	2	11	N-Term(Dimethyl:2H(6))	1	1	YJL052W	TDH1	1	3	1	384.249	1150.73	0.00888585	HCD	63.5388	67.525	4.5875	2662	Fusion002161.raw	17.06	21	14	164708	0	0.1379			9.6339e+06	4.77625e+07	9.6339e+06	4.77625e+07	4.95775
qe_Acetyl	High	sQGTLYINR	2	10	N-Term(Acetyl)	1	1	YKL081W	TEF4	0	1	1	1093.56	1093.56	-2.27844	HCD	0	248.902	40.7964	10594	qExPlus02_00982.raw	57.52	34	27	164982824	0.002723	0.0786			0	0	0	0
qe_Acetyl	High	sQGTLYINR	2	10	N-Term(Acetyl)	1	1	YKL081W	TEF4	0	2	1	547.285	1093.56	-0.11403	HCD	19.3563	250	40.7343	10365	qExPlus02_00984.raw	48.32	33	26	1.35916e+06	0.001447	0.05327			0	0
qe_Acetyl	High	sQGTLYINR	2	10	N-Term(Acetyl)	1	1	YKL081W	TEF4	0	2	1	547.284	1093.56	-2.56981	HCD	1.55373	31.4392	41.0046	10656	qExPlus02_00982.raw	51.95	36	29	2.49481e+09	0.005022	0.07588			0	0	0	0
qe	High	gSDVIEkSQILR	84	95	N-Term(Dimethyl:2H(6)); K7(Dimethyl:2H(6))	1	1	YKL081W	TEF4	1	2	1	706.946	1412.88	-1.15342	HCD	68.6871	250	28.5106	7066	qExPlus02_00984.raw	29.23	34	27	1.68371e+06	0	0.001586	2.72253e+06	1.68371e+06	2.72253e+06	1.68371e+06
qe	High	gSDVIEkSQILR	84	95	N-Term(Dimethyl); K7(Dimethyl)	1	1	YKL081W	TEF4	1	2	1	700.908	1400.81	-0.811501	HCD	31.1395	84.2513	28.7987	7141	qExPlus02_00984.raw	59.55	35	28	1.42528e+07	0	0.0002728	7.00418e+06	9102.34	9.72671e+06	1.69281e+06	9.72671e+06	1.69281e+06	0.174037
qe	Medium	sTVNVLR	2	8	N-Term(Dimethyl:2H(6))	1	1	YDR322C-A	TIM11	0	1	1	822.532	822.532	0.809005	HCD	0	250	20.6916	5124	qExPlus02_00983.raw	33.29	31	24	3.10744e+06	0.0347	0.3536	6.73206e+06	3.10744e+06	6.73206e+06	3.10744e+06	6.73206e+06	3.10744e+06	0.461588
qe_Acetyl	Medium	sTVNVLR	2	8	N-Term(Acetyl)	1	1	YDR322C-A	TIM11	0	1	1	830.471	830.471	-2.15614	HCD	6.30418	250	40.0622	10196	qExPlus02_00984.raw	38.07	36	29	1.86802e+07	0.01452	0.1318			0	0
qe_Acetyl	Medium	sTVNVLR	2	8	N-Term(Acetyl)	1	1	YDR322C-A	TIM11	0	1	1	830.471	830.471	-2.59711	HCD	43.1257	250	43.5043	11341	qExPlus02_00982.raw	10.46	36	29	1.76817e+07	0.04069	0.3108			0	0	0	0
qe	High	sTVNVLR	2	8	N-Term(Dimethyl)	1	1	YDR322C-A	TIM11	0	2	1	408.75	816.492	-2.18876	HCD	10.2331	22.4237	20.619	5105	qExPlus02_00983.raw	37.16	36	29	37415624	0.005141	0.08172	37415624	3.33179e+07	37415624	3.33179e+07	37415624	3.33179e+07	0.89048
qe_Acetyl	High	sTVNVLR	2	8	N-Term(Acetyl)	1	1	YDR322C-A	TIM11	0	2	1	415.739	830.471	-2.31932	HCD	0	250	39.9049	10778	qExPlus02_00983.raw	32.1	32	25	5.72814e+07	0.002723	0.07933			0	0
qe_Acetyl	High	sTVNVLR	2	8	N-Term(Acetyl)	1	1	YDR322C-A	TIM11	0	2	1	415.74	830.472	-0.77594	HCD	1.53949	32.6339	40.2372	10239	qExPlus02_00984.raw	36.85	31	24	124893889	0.002723	0.07033			0	0
qe_Acetyl	High	sTVNVLR	2	8	N-Term(Acetyl)	1	1	YDR322C-A	TIM11	0	2	1	415.739	830.471	-2.31932	HCD	2.91476	74.0401	39.7749	10261	qExPlus02_00982.raw	38.52	32	25	27127508630	0.006155	0.1045			0	0
qe_Acetyl	High	sTVNVLR	2	8	N-Term(Acetyl)	1	1	YDR322C-A	TIM11	0	2	1	415.739	830.471	-2.90728	HCD	14.9178	250	43.3106	11290	qExPlus02_00982.raw	29.55	32	25	2.85393e+07	0.006155	0.1063			0	0
qe_Acetyl	Medium	sTVNVLR	2	8	N-Term(Acetyl)	1	1	YDR322C-A	TIM11	0	2	1	415.739	830.472	-1.65787	HCD	0	250	44.3073	11567	qExPlus02_00982.raw	26.8	32	25	4.95709e+06	0.03233	0.2142			0	0
qe_Acetyl	Medium	sTVNVLR	2	8	N-Term(Acetyl)	1	1	YDR322C-A	TIM11	0	2	1	415.739	830.472	-1.80486	HCD	1.06058	56.5131	41.633	10839	qExPlus02_00982.raw	38.64	35	28	2.3907e+07	0.03167	0.2689			0	0	0	0
qe_Acetyl	High	sFFLNSLR	2	9	N-Term(Acetyl)	1	1	YBR091C	TIM12	0	2	1	513.274	1025.54	0.21124	HCD	0	250	79.9412	20455	qExPlus02_00982.raw	43.45	34	27	2.09075e+07	0.00508	0.09426			0	0	0	0
Fusion	High	vYTGFGLEQISPAQkkPYNELTPEEQGER	2	30	N-Term(Dimethyl); K15(Dimethyl); K16(Dimethyl)	1	1	YDL217C	TIM22	1	3	1	1131.59	3392.75	3.38712	HCD	0	48.4321	11.3273	6527	Fusion002161.raw	37.76	23	16	2.63852e+06	0	0.008319	2.31106e+06	2.54942e+06	2.31106e+06	2.54942e+06	2.31106e+06	2.54942e+06	1.10314
Fusion	High	vYTGFGLEQISPAQkkPYNELTPEEQGER	2	30	N-Term(Dimethyl); K15(Dimethyl); K16(Dimethyl)	1	1	YDL217C	TIM22	1	4	1	848.941	3392.74	0.91853	ETD	10.3743	50	11.1962	6453	Fusion002161.raw	40.65	23	16	2.73275e+08	0	0.05752	2.73275e+08	2.31937e+08	2.73275e+08	2.31937e+08	2.73275e+08	2.31937e+08	0.848732
qe	High	sLEGSQGLIPSR	80	91	N-Term(Dimethyl:2H(6))	1	1	YNR017W	TIM23	0	2	1	639.369	1277.73	-1.22	HCD	0	250	36.5509	9968	qExPlus02_00983.raw	68.82	35	28	8.26807e+06	0	4.119e-05	2.635e+07	8.26807e+06	2.635e+07	8.26807e+06	2.635e+07	8.26807e+06	0.313779
qe_Acetyl	High	sSESGkPIAkPIR	2	14	N-Term(Acetyl); K6(Dimethyl:2H(6)); K10(Dimethyl:2H(6))	1	1	YJL054W	TIM54	0	2	1	740.467	1479.93	-1.24125	HCD	0	250	16.8979	4121	qExPlus02_00984.raw	41.66	30	23	5.98252e+06	0	0.0123	5.54793e+06	5.98252e+06	5.54793e+06	5.98252e+06	5.54793e+06	5.98252e+06	1.07833
qe	High	nNVVHSFR	65	72	N-Term(Dimethyl)	1	1	YKL056C	TMA19	0	2	1	500.77	1000.53	0.290392	HCD	21.9213	250	13.4196	3234	qExPlus02_00984.raw	30.6	34	27	136750	0.0008655	0.02873			0	0	0	0
qe_Acetyl	High	sQSNPILR	2	9	N-Term(Acetyl)	1	1	YGR082W	TOM20	0	1	1	956.513	956.513	-3.16878	HCD	0	250	37.33	10162	qExPlus02_00983.raw	32.11	34	28	3.28342e+06	0.001447	0.05424			0	0
qe_Acetyl	High	sQSNPILR	2	9	N-Term(Acetyl)	1	1	YGR082W	TOM20	0	1	1	956.513	956.513	-2.78592	HCD	0	178.64	37.0873	9477	qExPlus02_00982.raw	41.85	34	27	2554862523	0.001447	0.05303			0	0	0	0
qe_Acetyl	High	sQSNPILR	2	9	N-Term(Acetyl)	1	1	YGR082W	TOM20	0	2	1	478.761	956.514	-1.90664	HCD	24.4794	250	37.2362	10140	qExPlus02_00983.raw	39.1	35	28	7584832	0.001447	0.02544			0	0
qe_Acetyl	High	sQSNPILR	2	9	N-Term(Acetyl)	1	1	YGR082W	TOM20	0	2	1	478.761	956.515	-0.885681	HCD		93.9495	37.5961	9562	qExPlus02_00984.raw	16.11	34	27	7.20355e+07	0	0.0125			0	0
qe_Acetyl	High	sQSNPILR	2	9	N-Term(Acetyl)	1	1	YGR082W	TOM20	0	2	1	478.759	956.511	-4.77808	HCD	0	149.012	37.0556	9465	qExPlus02_00982.raw	54.06	35	28	4.76603e+09	0.00508	0.09281			0	0
qe_Acetyl	High	sQSNPILR	2	9	N-Term(Acetyl)	1	1	YGR082W	TOM20	0	2	1	478.761	956.515	-1.33235	HCD	3.5389	5.12892	37.587	9624	qExPlus02_00982.raw	47.92	34	27	7.65357e+07	0.00508	0.1014			0	0	0	0
qe	High	vELTEIkDDVVQLDEPQFSR	2	21	N-Term(Dimethyl); K7(Dimethyl)	1	1	YNL131W	TOM22	1	2	1	1208.63	2416.26	-1.73846	HCD	0	250	59.0638	15449	qExPlus02_00983.raw	105.6	36	29	3.58877e+07	0	5.272e-09	3.58877e+07	7.37691e+07	3.58877e+07	7.37691e+07	3.58877e+07	7.37691e+07	2.05556
qe	High	vELTEIkDDVVQLDEPQFSR	2	21	N-Term(Dimethyl:2H(6)); K7(Dimethyl:2H(6))	1	1	YNL131W	TOM22	1	3	1	810.117	2428.34	-0.153774	HCD	28.8926	250	58.9176	15414	qExPlus02_00983.raw	37.36	35	28	387612173	0	2.021e-06	1.96663e+08	387612173	1.96663e+08	387612173	1.96663e+08	387612173	1.97095
qe_Acetyl	High	vELTEIkDDVVQLDEPQFSR	2	21	N-Term(Acetyl); K7(Dimethyl:2H(6))	1	1	YNL131W	TOM22	1	3	1	812.762	2436.27	-2.23865	HCD	0	250	75.9124	19532	qExPlus02_00983.raw	54.38	35	28	1.15051e+06	0	0.0002906	633409	1.15051e+06	633409	1.15051e+06	633409	1.15051e+06	1.81638
Fusion	High	vELTEIkDDVVQLDEPQFSR	2	21	N-Term(Dimethyl:2H(6)); K7(Dimethyl:2H(6))	1	1	YNL131W	TOM22	1	3	1	810.117	2428.34	0.600263	HCD	0	44.5444	25.0866	14125	Fusion002161.raw	60.26	22	15	2.2976e+06	0	0.001151		763663	0	763663	0	763663
qe	High	eLTEIkDDVVQLDEPQFSR	3	21	N-Term(Dimethyl:2H(6)); K6(Dimethyl:2H(6))	1	1	YNL131W	TOM22	1	3	1	777.093	2329.27	-0.7396	HCD	4.56035	250	53.7267	14152	qExPlus02_00983.raw	78.29	35	28	8.54662e+06	0	8.858e-09	5.08671e+06	8.46157e+06	5.08671e+06	8.46157e+06	5.08671e+06	8.46157e+06	1.66347
qe	High	kDDVVQLDEPQFSR	8	21	N-Term(Dimethyl:2H(6)); K1(Dimethyl:2H(6))	1	1	YNL131W	TOM22	1	2	1	872.483	1743.96	-4.18957	HCD		250	37.468	9532	qExPlus02_00984.raw	38.51	35	28	8785257	0	4.958e-05	1.21465e+07	8.48393e+06	1.21465e+07	8.48393e+06	1.21465e+07	8.48393e+06	0.698469
qe	Medium	dEPQFSR	15	21	N-Term(Dimethyl:2H(6))	1	1	YNL131W	TOM22	0	2	1	456.738	912.468	-1.3464	HCD	0	166.609	21.7855	5411	qExPlus02_00983.raw	29.4	32	25	3.02804e+06	0.01666	0.2509			0	0	0	0
qe	High	mFGLPQQEVSEEEkR	1	15	N-Term(Dimethyl:2H(6)); M1(Oxidation); K14(Dimethyl:2H(6))	1	1	YPR133W-A	TOM5	1	2	1	946.003	1891	-1.50195	HCD	6.91423	51.6054	31.3768	7835	qExPlus02_00984.raw	82.6	34	27	148415871	0	6.98e-07	9102.34	51219064	9102.34	51219064
qe	High	mFGLPQQEVSEEEkR	1	15	N-Term(Dimethyl:2H(6)); M1(Oxidation); K14(Dimethyl:2H(6))	1	1	YPR133W-A	TOM5	1	2	1	946.002	1891	-2.27659	HCD	9.77824	201.065	31.6427	7913	qExPlus02_00984.raw	82.32	34	27	1.86537e+08	0	2.519e-05	1.57552e+08	1.86537e+08	1.57561e+08	2.37756e+08
qe	High	mFGLPQQEVSEEEkR	1	15	N-Term(Dimethyl); M1(Oxidation); K14(Dimethyl)	1	1	YPR133W-A	TOM5	1	2	1	939.968	1878.93	0.829705	HCD	0	250	32.0288	8007	qExPlus02_00984.raw	88.38	35	28	3.23378e+06	0	2.197e-08	3.23378e+06	1.56338e+06	1.60795e+08	2.39319e+08
qe	High	mFGLPQQEVSEEEkR	1	15	N-Term(Dimethyl:2H(6)); M1(Oxidation); K14(Dimethyl:2H(6))	1	1	YPR133W-A	TOM5	1	2	1	946.003	1891	-1.95382	HCD	0	250	32.2015	8054	qExPlus02_00984.raw	55.84	34	27	1.7942e+06	0	8.966e-05	1.0086e+06	1.45204e+06	1.61803e+08	2.40772e+08
qe	High	mFGLPQQEVSEEEkR	1	15	N-Term(Dimethyl); M1(Oxidation); K14(Dimethyl)	1	1	YPR133W-A	TOM5	1	2	1	939.967	1878.93	0.30996	HCD	0	250	32.2993	8078	qExPlus02_00984.raw	60.48	35	28	4.63691e+06	0	7.515e-07	4.63691e+06	3.81224e+06	1.6644e+08	2.44584e+08
qe	High	mFGLPQQEVSEEEkR	1	15	N-Term(Dimethyl:2H(6)); M1(Oxidation); K14(Dimethyl:2H(6))	1	1	YPR133W-A	TOM5	1	2	1	946.002	1891	-2.27659	HCD	0	250	32.6112	8154	qExPlus02_00984.raw	52.05	34	27	430126	0	0.000274	1.73727e+06		1.68177e+08	2.44584e+08
qe	High	mFGLPQQEVSEEEkR	1	15	N-Term(Dimethyl:2H(6)); K14(Dimethyl:2H(6))	1	1	YPR133W-A	TOM5	1	2	1	938.009	1875.01	1.6977	HCD	7.02691	250	35.2728	8948	qExPlus02_00984.raw	88.55	35	28	5.89058e+08	0	1.082e-05			1.68177e+08	2.44584e+08
qe	High	mFGLPQQEVSEEEkR	1	15	N-Term(Dimethyl:2H(6)); K14(Dimethyl:2H(6))	1	1	YPR133W-A	TOM5	1	2	1	938.007	1875.01	-0.646038	HCD	0	12.0514	35.5336	9020	qExPlus02_00984.raw	98.56	34	27	6.61537e+08	0	1.228e-05			1.68177e+08	2.44584e+08
qe	High	mFGLPQQEVSEEEkR	1	15	N-Term(Dimethyl); M1(Oxidation); K14(Dimethyl)	1	1	YPR133W-A	TOM5	1	2	1	939.966	1878.93	-0.72953	HCD	14.1838	97.1967	35.5461	9024	qExPlus02_00984.raw	71.07	34	27	2.41312e+07	0	4.341e-05	17241134	6.44407e+06	1.85419e+08	251027838
qe	High	mFGLPQQEVSEEEkR	1	15	N-Term(Dimethyl); K14(Dimethyl)	1	1	YPR133W-A	TOM5	1	2	1	931.969	1862.93	-0.320118	HCD	0.796196	45.7413	35.6974	9066	qExPlus02_00984.raw	107.23	35	28	4.53942e+08	0	1.996e-08			1.85419e+08	251027838
qe	High	mFGLPQQEVSEEEkR	1	15	N-Term(Dimethyl:2H(6)); K14(Dimethyl:2H(6))	1	1	YPR133W-A	TOM5	1	2	1	938.008	1875.01	0.786248	HCD	45.1337	250	35.8159	9093	qExPlus02_00984.raw	58.28	34	27	4.30705e+06	0	0.0001185	1.02813e+07	4.30705e+06	1.957e+08	2.55335e+08	1.957e+08	2.55335e+08	1.30473
qe_Acetyl	High	mFGLPQQEVSEEEkR	1	15	N-Term(Acetyl); M1(Oxidation); K14(Dimethyl:2H(6))	1	1	YPR133W-A	TOM5	1	2	1	949.979	1898.95	3.34099	HCD		250	45.0289	11998	qExPlus02_00983.raw	60.75	34	27	1.9928e+06	0	0.0003031	19568.4	514872	19568.4	514872
qe_Acetyl	High	mFGLPQQEVSEEEkR	1	15	N-Term(Acetyl); K14(Dimethyl)	1	1	YPR133W-A	TOM5	1	2	1	938.958	1876.91	-1.10722	HCD	22.9375	250	54.4913	14327	qExPlus02_00983.raw	47.43	35	28	4.00223e+06	0	0.001997	4.00223e+06	5.31401e+06	4.02179e+06	5.82888e+06
qe_Acetyl	High	mFGLPQQEVSEEEkR	1	15	N-Term(Acetyl); M1(Oxidation); K14(Dimethyl:2H(6))	1	1	YPR133W-A	TOM5	1	2	1	949.973	1898.94	-2.17836	HCD	0	250	54.561	14343	qExPlus02_00983.raw	28.44	34	27	1.82438e+06	0.001447	0.03474		735414	4.02179e+06	6.56429e+06	4.02179e+06	6.56429e+06	1.63218
qe	High	mFGLPQQEVSEEEkR	1	15	N-Term(Dimethyl:2H(6)); M1(Oxidation); K14(Dimethyl:2H(6))	1	1	YPR133W-A	TOM5	1	3	1	631.004	1891	-1.92866	HCD	6.32691	54.4438	31.3372	7823	qExPlus02_00984.raw	51.98	34	27	5.86908e+08	0	2.109e-06	6.1235e+08	5.86908e+08	6.1235e+08	5.86908e+08
qe	High	mFGLPQQEVSEEEkR	1	15	N-Term(Dimethyl); M1(Oxidation); K14(Dimethyl)	1	1	YPR133W-A	TOM5	1	3	1	626.982	1878.93	1.99197	HCD	15.0371	67.1999	31.9991	8000	qExPlus02_00984.raw	51.37	35	28	7.00207e+07	0	2.354e-07	26468344	9102.34	6.38819e+08	5.86917e+08
qe	High	mFGLPQQEVSEEEkR	1	15	N-Term(Dimethyl:2H(6)); M1(Oxidation); K14(Dimethyl:2H(6))	1	1	YPR133W-A	TOM5	1	3	1	631.006	1891	1.07307	HCD	44.6689	153.601	32.1567	8043	qExPlus02_00984.raw	32.46	34	27	1.07042e+07	0	9.071e-06	3.86147e+06	10572473	6.4268e+08	5.9749e+08
qe	High	mFGLPQQEVSEEEkR	1	15	N-Term(Dimethyl); M1(Oxidation); K14(Dimethyl)	1	1	YPR133W-A	TOM5	1	3	1	626.983	1878.93	3.84357	HCD	12.4103	250	32.2588	8068	qExPlus02_00984.raw	58.24	35	28	2.32747e+07	0	7.686e-08	2.32747e+07	1.8992e+07	6.65955e+08	6.16482e+08
qe	High	mFGLPQQEVSEEEkR	1	15	N-Term(Dimethyl); M1(Oxidation); K14(Dimethyl)	1	1	YPR133W-A	TOM5	1	3	1	626.98	1878.92	-1.12649	HCD	33.9465	98.3213	34.1256	8641	qExPlus02_00984.raw	41.05	34	27	6.93298e+06	0	1.241e-06	6.72961e+06	8.56699e+06	6.72684e+08	6.25049e+08
qe	High	mFGLPQQEVSEEEkR	1	15	N-Term(Dimethyl:2H(6)); M1(Oxidation); K14(Dimethyl:2H(6))	1	1	YPR133W-A	TOM5	1	3	1	631.005	1891	-0.66987	HCD	24.5814	250	34.4258	8721	qExPlus02_00984.raw	46.78	34	27	5735553	0	1.955e-05	8566594	5735553	6.81251e+08	6.30785e+08
qe	High	mFGLPQQEVSEEEkR	1	15	N-Term(Dimethyl:2H(6)); K14(Dimethyl:2H(6))	1	1	YPR133W-A	TOM5	1	3	1	625.673	1875.01	-0.718314	HCD	5.10752	13.7147	35.3115	8960	qExPlus02_00984.raw	52.18	34	27	1.8958e+09	0	3.435e-06			6.81251e+08	6.30785e+08
qe	High	mFGLPQQEVSEEEkR	1	15	N-Term(Dimethyl:2H(6)); K14(Dimethyl:2H(6))	1	1	YPR133W-A	TOM5	1	3	1	625.673	1875	-1.98784	HCD	7.27623	4.64212	35.5801	9035	qExPlus02_00984.raw	56.77	34	27	1.8958e+09	0	4.938e-10			6.81251e+08	6.30785e+08
qe	High	mFGLPQQEVSEEEkR	1	15	N-Term(Dimethyl:2H(6)); M1(Oxidation); K14(Dimethyl:2H(6))	1	1	YPR133W-A	TOM5	1	3	1	631.005	1891	-1.25085	HCD	13.2447	9.90959	35.5439	9023	qExPlus02_00984.raw	46.45	34	27	9.46811e+07	0	4.616e-05	5.45511e+07	9.46811e+07	7.35802e+08	7.25466e+08
qe	High	mFGLPQQEVSEEEkR	1	15	N-Term(Dimethyl); K14(Dimethyl)	1	1	YPR133W-A	TOM5	1	3	1	621.649	1862.93	0.000293808	HCD	1.18316	9.7314	35.696	9065	qExPlus02_00984.raw	60.64	35	28	1.32328e+09	0	8.748e-10			7.35802e+08	7.25466e+08
qe	High	mFGLPQQEVSEEEkR	1	15	N-Term(Dimethyl:2H(6)); K14(Dimethyl:2H(6))	1	1	YPR133W-A	TOM5	1	3	1	625.673	1875.01	-0.620658	HCD	14.5544	60.6275	35.8417	9101	qExPlus02_00984.raw	50.49	34	27	1.48728e+07	0	5.246e-07	35416139	1.48728e+07	7.71218e+08	7.40338e+08
qe	High	mFGLPQQEVSEEEkR	1	15	N-Term(Dimethyl:2H(6)); M1(Oxidation); K14(Dimethyl:2H(6))	1	1	YPR133W-A	TOM5	1	3	1	631.007	1891.01	2.23503	HCD	27.1913	250	35.8887	9115	qExPlus02_00984.raw	50.24	34	27	5.63983e+06	0	1.384e-07	6780937	5.63983e+06	7.77999e+08	7.45978e+08	7.77999e+08	7.45978e+08	0.958842
qe_Acetyl	High	mFGLPQQEVSEEEkR	1	15	N-Term(Acetyl); M1(Oxidation); K14(Dimethyl:2H(6))	1	1	YPR133W-A	TOM5	1	3	1	633.653	1898.94	0.32161	HCD		250	44.9852	11988	qExPlus02_00983.raw	22.96	34	27	1.1133e+06	0	0.002056	745280	1.02906e+06	745280	1.02906e+06
qe_Acetyl	High	mFGLPQQEVSEEEkR	1	15	N-Term(Acetyl); K14(Dimethyl:2H(6))	1	1	YPR133W-A	TOM5	1	3	1	628.322	1882.95	1.8377	HCD	26.9109	250	54.4865	14326	qExPlus02_00983.raw	49.89	35	28	5.36619e+06	0	4.044e-05	3.66181e+06	5.36619e+06	4.40709e+06	6.39525e+06	4.40709e+06	6.39525e+06	1.45113
Fusion	Medium	mFGLPQQEVSEEEkR	1	15	N-Term(Dimethyl:2H(6)); M1(Oxidation); K14(Dimethyl:2H(6))	1	1	YPR133W-A	TOM5	1	3	1	631.006	1891	0.104769	HCD	8.39072	39.6784	59.0691	27214	Fusion002161.raw	8.46	21	14	1.82061e+06	0.02617	0.2347	2.00257e+06	1.78386e+06	2.00257e+06	1.78386e+06
Fusion	High	mFGLPQQEVSEEEkR	1	15	N-Term(Dimethyl); K14(Dimethyl)	1	1	YPR133W-A	TOM5	1	3	1	621.649	1862.93	0.491738	HCD	20.214	85.8439	73.1741	30758	Fusion002161.raw	13.94	22	15	692379	0	0.2285	692379	688783	2.69495e+06	2.47265e+06
Fusion	High	mFGLPQQEVSEEEkR	1	15	N-Term(Dimethyl:2H(6)); K14(Dimethyl:2H(6))	1	1	YPR133W-A	TOM5	1	3	1	625.673	1875	-1.4019	HCD	33.4261	39.0129	1.82332	1047	Fusion002161.raw	18.78	21	14	1.88047e+06	0	0.09671			2.69495e+06	2.47265e+06	2.69495e+06	2.47265e+06	0.917513
qe	High	fGLPQQEVSEEEkR	2	15	N-Term(Dimethyl:2H(6)); K13(Dimethyl:2H(6))	1	1	YPR133W-A	TOM5	1	2	1	872.486	1743.97	-0.719108	HCD	0	250	30.173	7505	qExPlus02_00984.raw	88.7	35	28	2.60727e+06	0	1.938e-05	33997394	2.60727e+06	33997394	2.60727e+06	33997394	2.60727e+06	0.0766904
qe	High	fGLPQQEVSEEEkR	2	15	N-Term(Dimethyl:2H(6)); K13(Dimethyl:2H(6))	1	1	YPR133W-A	TOM5	1	3	1	581.995	1743.97	1.82803	HCD	45.7915	250	30.1268	7494	qExPlus02_00984.raw	45.53	35	28	1.68868e+06	0	4.695e-07	9102.34	1.29668e+06	9102.34	1.29668e+06
qe	High	fGLPQQEVSEEEkR	2	15	N-Term(Dimethyl); K13(Dimethyl)	1	1	YPR133W-A	TOM5	1	3	1	577.969	1731.89	1.35005	HCD	1.609	250	30.1873	7508	qExPlus02_00984.raw	65.19	36	29	6.89438e+07	0	1.009e-09	6.74123e+07	7.64436e+06	6.74214e+07	8.94104e+06
qe	High	fGLPQQEVSEEEkR	2	15	N-Term(Dimethyl); K13(Dimethyl)	1	1	YPR133W-A	TOM5	1	3	1	577.969	1731.89	0.715698	HCD	67.9589	250	30.46	7572	qExPlus02_00984.raw	23.91	36	29	155684	0	0.01076	95841.2	9102.34	6.75173e+07	8.95014e+06	6.75173e+07	8.95014e+06	0.132561
qe	High	gLPQQEVSEEEkR	3	15	N-Term(Dimethyl); K12(Dimethyl)	1	1	YPR133W-A	TOM5	1	2	1	792.912	1584.82	-4.1431	HCD	0	250	18.4096	4486	qExPlus02_00984.raw	74.76	35	28	4.78523e+06	0	2.759e-05	4.63089e+06	1.33312e+06	4.63089e+06	1.33312e+06	4.63089e+06	1.33312e+06	0.287875
qe	High	gLPQQEVSEEEkR	3	15	N-Term(Dimethyl); K12(Dimethyl)	1	1	YPR133W-A	TOM5	1	3	1	528.947	1584.83	1.89484	HCD	67.7118	250	18.3926	4482	qExPlus02_00984.raw	29.61	35	28	6.68042e+06	0	0.001106	6.68042e+06	2.33843e+06	6.68042e+06	2.33843e+06	6.68042e+06	2.33843e+06	0.350042
qe_Acetyl	High	mDGmFAMPGAAAGAASPQQPkSR	1	23	N-Term(Acetyl); M1(Oxidation); M4(Oxidation); K21(Dimethyl)	1	1	YOR045W	TOM6	1	2	1	1190.05	2379.09	-0.95827	HCD	0	250	51.2142	13516	qExPlus02_00983.raw	96.98	33	26	6.58728e+06	0	0.001837	6.58728e+06	1.44527e+07	6.58728e+06	1.44527e+07
qe_Acetyl	High	mDGMFAMPGAAAGAASPQQPkSR	1	23	N-Term(Acetyl); M1(Oxidation); K21(Dimethyl)	1	1	YOR045W	TOM6	1	2	1	1182.05	2363.1	2.0491	HCD	0	250	51.2095	13515	qExPlus02_00983.raw	86.63	34	27	1.55041e+07	0	0.0005804	1.49493e+07	2.89601e+07	2.15365e+07	4.34129e+07
qe_Acetyl	High	mDGmFAMPGAAAGAASPQQPkSR	1	23	N-Term(Acetyl); M1(Oxidation); M4(Oxidation); K21(Dimethyl)	1	1	YOR045W	TOM6	1	2	1	1190.05	2379.09	-1.47137	HCD	0	250	60.494	15780	qExPlus02_00983.raw	72.65	33	26	7.82206e+06	0	0.005868	7.82206e+06	1.2687e+07	2.93586e+07	5.60999e+07
qe_Acetyl	High	mDGMFAMPGAAAGAASPQQPkSR	1	23	N-Term(Acetyl); M1(Oxidation); K21(Dimethyl)	1	1	YOR045W	TOM6	1	2	2	1182.05	2363.09	-2.18677	HCD	0	250	60.4596	15772	qExPlus02_00983.raw	82.66	33	26	1.46105e+07	0	0.0002084	1.46105e+07	2.52595e+07	4.39691e+07	8.13594e+07
qe_Acetyl	High	mDGMFAMPGAAAGAASPQQPkSR	1	23	N-Term(Acetyl); K21(Dimethyl)	1	1	YOR045W	TOM6	1	2	1	1174.05	2347.1	-1.0396	HCD	0	250	60.4135	15761	qExPlus02_00983.raw	89.53	34	27	3.0236e+07	0	0.0004258	3.0236e+07	50886142	7.42051e+07	1.32246e+08	7.42051e+07	1.32246e+08	1.78216
qe_Acetyl	High	mDGMFAmPGAAAGAASPQQPkSR	1	23	N-Term(Acetyl); M1(Oxidation); M7(Oxidation); K21(Dimethyl:2H(6))	1	1	YOR045W	TOM6	1	3	1	795.713	2385.13	-0.680961	HCD	9.411	250	41.4786	11151	qExPlus02_00983.raw	71.66	33	26	7.5856e+06	0	1.874e-06	3.65441e+06	7.5856e+06	3.65441e+06	7.5856e+06
qe_Acetyl	High	mDGmFAMPGAAAGAASPQQPkSR	1	23	N-Term(Acetyl); M1(Oxidation); M4(Oxidation); K21(Dimethyl:2H(6))	1	1	YOR045W	TOM6	1	3	1	795.712	2385.12	-2.06282	HCD	22.303	250	43.4455	11618	qExPlus02_00983.raw	67.52	33	26	9.65201e+06	0	2.303e-06	5.99064e+06	9.65201e+06	9.64505e+06	1.72376e+07
qe_Acetyl	High	mDGmFAmPGAAAGAASPQQPkSR	1	23	N-Term(Acetyl); M1(Oxidation); M4(Oxidation); M7(Oxidation); K21(Dimethyl:2H(6))	1	1	YOR045W	TOM6	1	3	1	801.043	2401.11	-2.93081	HCD		250	41.8111	11233	qExPlus02_00983.raw	67.22	32	25	3.07942e+06	0	4.215e-06	19568.4	1.00715e+06	9.66462e+06	1.82448e+07
qe_Acetyl	High	mDGmFAmPGAAAGAASPQQPkSR	1	23	N-Term(Acetyl); M1(Oxidation); M4(Oxidation); M7(Oxidation); K21(Dimethyl:2H(6))	1	1	YOR045W	TOM6	1	3	1	801.044	2401.12	-2.24448	HCD	12.3846	250	34.2797	9378	qExPlus02_00983.raw	63.9	32	25	4.85624e+06	0	1.856e-07	1.30807e+06	3.72239e+06	1.09727e+07	2.19672e+07
qe_Acetyl	High	mDGmFAMPGAAAGAASPQQPkSR	1	23	N-Term(Acetyl); M1(Oxidation); M4(Oxidation); K21(Dimethyl:2H(6))	1	1	YOR045W	TOM6	1	3	1	795.712	2385.12	-2.67697	HCD	69.3142	250	43.7223	11684	qExPlus02_00983.raw	65.14	33	26	1.17775e+07	0	6.136e-07	7.62103e+06	1.16596e+07	1.85937e+07	3.36268e+07
qe_Acetyl	High	mDGMFAMPGAAAGAASPQQPkSR	1	23	N-Term(Acetyl); M1(Oxidation); K21(Dimethyl:2H(6))	1	1	YOR045W	TOM6	1	3	2	790.382	2369.13	-0.332935	HCD	55.4787	250	54.3608	14297	qExPlus02_00983.raw	52.68	33	26	916920	0	1.513e-05	19568.4	306930	1.86133e+07	3.39337e+07
qe_Acetyl	High	mDGmFAmPGAAAGAASPQQPkSR	1	23	N-Term(Acetyl); M4(Oxidation); M7(Oxidation); K21(Dimethyl:2H(6))	1	1	YOR045W	TOM6	1	3	3	795.719	2385.14	6.45862	HCD	9.47561	250	53.9521	14204	qExPlus02_00983.raw	61.05	33	26	415022	0	4.137e-06	401109		1.90144e+07	3.39337e+07
qe_Acetyl	High	mDGMFAMPGAAAGAASPQQPkSR	1	23	N-Term(Acetyl); M1(Oxidation); K21(Dimethyl:2H(6))	1	1	YOR045W	TOM6	1	3	2	790.379	2369.12	-4.27462	HCD	4.14933	250	53.8075	14171	qExPlus02_00983.raw	49.4	33	26	973390	0	1.255e-05	666476	973390	1.96809e+07	3.49071e+07
qe_Acetyl	High	mDGMFAMPGAAAGAASPQQPkSR	1	23	N-Term(Acetyl); M1(Oxidation); K21(Dimethyl)	1	1	YOR045W	TOM6	1	3	1	788.369	2363.09	-0.126181	HCD	64.4154	171.811	51.2954	13538	qExPlus02_00983.raw	68.74	33	26	3.64929e+07	0	3.579e-05	3.64929e+07	6.73855e+07	5.61738e+07	1.02293e+08
qe_Acetyl	High	mDGMFAmPGAAAGAASPQQPkSR	1	23	N-Term(Acetyl); M1(Oxidation); M7(Oxidation); K21(Dimethyl:2H(6))	1	1	YOR045W	TOM6	1	3	1	795.713	2385.13	-0.373882	HCD	26.3778	250	51.0914	13487	qExPlus02_00983.raw	59.87	33	26	83878254	0	4.542e-06	2.7787e+07	51476014	8.39608e+07	1.53769e+08
qe_Acetyl	High	mDGMFAmPGAAAGAASPQQPkSR	1	23	N-Term(Acetyl); M7(Oxidation); K21(Dimethyl:2H(6))	1	1	YOR045W	TOM6	1	3	1	790.382	2369.13	-0.101071	HCD	16.7709	250	50.7746	13413	qExPlus02_00983.raw	73.57	33	26	2.60625e+07	0	5.763e-06	1.70028e+07	2.60625e+07	1.00964e+08	1.79831e+08
qe_Acetyl	High	mDGMFAmPGAAAGAASPQQPkSR	1	23	N-Term(Acetyl); M1(Oxidation); M7(Oxidation); K21(Dimethyl)	1	1	YOR045W	TOM6	1	3	2	793.698	2379.08	-3.40113	HCD	77.2285	250	60.6467	15816	qExPlus02_00983.raw	61.44	33	26	32091470	0	0.0005373	32091470	50677092	1.33055e+08	2.30508e+08
qe_Acetyl	High	mDGMFAMPGAAAGAASPQQPkSR	1	23	N-Term(Acetyl); K21(Dimethyl:2H(6))	1	1	YOR045W	TOM6	1	3	1	785.05	2353.14	-0.602685	HCD	4.29299	174.187	60.6326	15813	qExPlus02_00983.raw	72.36	34	27	1.32661e+08	0	8.704e-07	78155940	128322244	2.11211e+08	3.5883e+08	2.11211e+08	3.5883e+08	1.69892
qe	Medium	amPGAAAGAASPQQPkSR	6	23	N-Term(Dimethyl); M2(Oxidation); K16(Dimethyl)	1	1	YOR045W	TOM6	1	3	1	589.975	1767.91	-3.97099	HCD		250	13.0501	3146	qExPlus02_00984.raw	14.64	36	29	390400	0.0131	0.1994	390400	339096	390400	339096
qe	High	amPGAAAGAASPQQPkSR	6	23	N-Term(Dimethyl); M2(Oxidation); K16(Dimethyl)	1	1	YOR045W	TOM6	1	3	1	589.977	1767.92	-0.967424	HCD	39.2927	250	18.2868	4458	qExPlus02_00984.raw	45.73	36	29	4.59166e+06	0	0.0005097	2391522		2.78192e+06	339096
qe	Medium	amPGAAAGAASPQQPkSR	6	23	N-Term(Dimethyl); M2(Oxidation); K16(Dimethyl)	1	1	YOR045W	TOM6	1	3	1	589.976	1767.91	-1.48528	HCD	45.6258	250	37.1336	8839	qExPlus02_00989.raw	5.78	36	29	374497	0.04605	0.4239	311894		3.09382e+06	339096
[truncated: 168 more rows]
